# Supplementary material for: Understanding the structural requirements of cyclic sulfone hydroxyethylamines as hBACE1 inhibitors against Aβ plaques in Alzheimer's disease: a predictive QSAR approach
Source: Royal Society of Chemistry journal article supplement (doi:10.1039/c6ra04104c), 2016-01-01
Supplement: c6ra04104c2.sdf [file c6ra04104c2.sdf]

Dataset (1)
 OpenBabel02101614293D

 56 58  0  0  0  0  0  0  0  0999 V2000
    7.8518   -2.5413    0.9460 C   0  0  0  0  0  0  0  0  0  0  0  0
    7.8058   -1.0003    0.6947 C   0  0  2  0  0  0  0  0  0  0  0  0
    7.0445   -0.6445   -0.6391 C   0  0  1  0  0  0  0  0  0  0  0  0
    5.5436   -1.1066   -0.7056 C   0  0  2  0  0  0  0  0  0  0  0  0
    5.3822   -2.6492   -0.5807 C   0  0  0  0  0  0  0  0  0  0  0  0
    6.1773   -3.2652    0.9417 S   0  0  0  0  0  0  0  0  0  0  0  0
    6.2587   -4.8659    0.9146 O   0  0  0  0  0  0  0  0  0  0  0  0
    5.3555   -2.7734    2.2266 O   0  0  0  0  0  0  0  0  0  0  0  0
    7.0622    0.7756   -0.8054 O   0  0  0  0  0  0  0  0  0  0  0  0
    4.9265   -0.6202   -1.9781 N   0  0  0  0  0  0  0  0  0  0  0  0
    9.2563   -0.3955    0.7341 C   0  0  0  0  0  0  0  0  0  0  0  0
    3.4452   -0.6706   -2.0779 C   0  0  0  0  0  0  0  0  0  0  0  0
    2.9544   -0.0278   -3.3256 C   0  0  0  0  0  0  0  0  0  0  0  0
    2.4799    1.3071   -3.3240 C   0  0  0  0  0  0  0  0  0  0  0  0
    1.9624    1.9154   -4.4961 C   0  0  0  0  0  0  0  0  0  0  0  0
    1.9398    1.1517   -5.6883 C   0  0  0  0  0  0  0  0  0  0  0  0
    2.4006   -0.1756   -5.7049 C   0  0  0  0  0  0  0  0  0  0  0  0
    2.9081   -0.7610   -4.5336 C   0  0  0  0  0  0  0  0  0  0  0  0
    9.9498   -0.6120    2.0384 C   0  0  0  0  0  0  0  0  0  0  0  0
   10.8312   -1.7063    2.2164 C   0  0  0  0  0  0  0  0  0  0  0  0
   11.3934   -1.9790    3.4786 C   0  0  0  0  0  0  0  0  0  0  0  0
   11.1062   -1.1432    4.5721 C   0  0  0  0  0  0  0  0  0  0  0  0
   10.2640   -0.0294    4.4021 C   0  0  0  0  0  0  0  0  0  0  0  0
    9.6890    0.2343    3.1438 C   0  0  0  0  0  0  0  0  0  0  0  0
    1.4488    3.3273   -4.4910 C   0  0  0  0  0  0  0  0  0  0  0  0
    2.5808    4.3555   -4.2159 C   0  0  0  0  0  0  0  0  0  0  0  0
    0.2400    3.5209   -3.5320 C   0  0  0  0  0  0  0  0  0  0  0  0
    8.4434   -3.0288    0.1669 H   0  0  0  0  0  0  0  0  0  0  0  0
    8.2861   -2.7762    1.9175 H   0  0  0  0  0  0  0  0  0  0  0  0
    7.2413   -0.5432    1.5146 H   0  0  0  0  0  0  0  0  0  0  0  0
    7.5870   -1.0817   -1.4853 H   0  0  0  0  0  0  0  0  0  0  0  0
    5.0215   -0.6313    0.1317 H   0  0  0  0  0  0  0  0  0  0  0  0
    4.3320   -2.9336   -0.5329 H   0  0  0  0  0  0  0  0  0  0  0  0
    5.8435   -3.1425   -1.4393 H   0  0  0  0  0  0  0  0  0  0  0  0
    6.6951    0.9329   -1.6997 H   0  0  0  0  0  0  0  0  0  0  0  0
    5.3147   -1.1743   -2.7439 H   0  0  0  0  0  0  0  0  0  0  0  0
    9.8490   -0.8242   -0.0791 H   0  0  0  0  0  0  0  0  0  0  0  0
    9.2212    0.6807    0.5442 H   0  0  0  0  0  0  0  0  0  0  0  0
    3.1012   -1.7071   -2.0648 H   0  0  0  0  0  0  0  0  0  0  0  0
    3.0087   -0.1784   -1.2063 H   0  0  0  0  0  0  0  0  0  0  0  0
    2.5043    1.8439   -2.4545 H   0  0  0  0  0  0  0  0  0  0  0  0
    1.5811    1.5557   -6.5577 H   0  0  0  0  0  0  0  0  0  0  0  0
    2.3630   -0.7175   -6.5698 H   0  0  0  0  0  0  0  0  0  0  0  0
    3.2299   -1.7338   -4.5616 H   0  0  0  0  0  0  0  0  0  0  0  0
   11.0444   -2.3319    1.4339 H   0  0  0  0  0  0  0  0  0  0  0  0
   12.0019   -2.7917    3.6021 H   0  0  0  0  0  0  0  0  0  0  0  0
   11.5100   -1.3456    5.4899 H   0  0  0  0  0  0  0  0  0  0  0  0
   10.0641    0.5849    5.1952 H   0  0  0  0  0  0  0  0  0  0  0  0
    9.0671    1.0406    3.0414 H   0  0  0  0  0  0  0  0  0  0  0  0
    1.0679    3.5758   -5.4878 H   0  0  0  0  0  0  0  0  0  0  0  0
    2.2008    5.3747   -4.3229 H   0  0  0  0  0  0  0  0  0  0  0  0
    2.9882    4.2473   -3.2081 H   0  0  0  0  0  0  0  0  0  0  0  0
    3.3925    4.2234   -4.9357 H   0  0  0  0  0  0  0  0  0  0  0  0
   -0.1740    4.5259   -3.6448 H   0  0  0  0  0  0  0  0  0  0  0  0
    0.5264    3.3882   -2.4865 H   0  0  0  0  0  0  0  0  0  0  0  0
   -0.5502    2.8056   -3.7705 H   0  0  0  0  0  0  0  0  0  0  0  0
  1 28  1  0  0  0  0
  1 29  1  0  0  0  0
  2  1  1  0  0  0  0
  2 11  1  0  0  0  0
  2 30  1  1  0  0  0
  3  2  1  0  0  0  0
  3  4  1  0  0  0  0
  3  9  1  0  0  0  0
  3 31  1  6  0  0  0
  4  5  1  0  0  0  0
  4 10  1  0  0  0  0
  4 32  1  1  0  0  0
  5  6  1  0  0  0  0
  5 33  1  0  0  0  0
  5 34  1  0  0  0  0
  6  1  1  0  0  0  0
  6  7  2  0  0  0  0
  6  8  2  0  0  0  0
  9 35  1  0  0  0  0
 10 12  1  0  0  0  0
 10 36  1  0  0  0  0
 11 19  1  0  0  0  0
 11 37  1  0  0  0  0
 11 38  1  0  0  0  0
 12 13  1  0  0  0  0
 12 39  1  0  0  0  0
 12 40  1  0  0  0  0
 13 14  2  0  0  0  0
 14 15  1  0  0  0  0
 14 41  1  0  0  0  0
 15 16  2  0  0  0  0
 15 25  1  0  0  0  0
 16 17  1  0  0  0  0
 16 42  1  0  0  0  0
 17 18  2  0  0  0  0
 17 43  1  0  0  0  0
 18 13  1  0  0  0  0
 18 44  1  0  0  0  0
 19 20  2  0  0  0  0
 20 21  1  0  0  0  0
 20 45  1  0  0  0  0
 21 22  2  0  0  0  0
 21 46  1  0  0  0  0
 22 23  1  0  0  0  0
 22 47  1  0  0  0  0
 23 24  2  0  0  0  0
 23 48  1  0  0  0  0
 24 19  1  0  0  0  0
 24 49  1  0  0  0  0
 25 26  1  0  0  0  0
 25 27  1  0  0  0  0
 25 50  1  0  0  0  0
 26 51  1  0  0  0  0
 26 52  1  0  0  0  0
 26 53  1  0  0  0  0
 27 54  1  0  0  0  0
 27 55  1  0  0  0  0
 27 56  1  0  0  0  0
M  END
$$$$
Dataset (2)
 OpenBabel02101614293D

 56 58  0  0  0  0  0  0  0  0999 V2000
    7.2605   -2.2039    1.4031 C   0  0  0  0  0  0  0  0  0  0  0  0
    7.2637   -0.6978    0.9903 C   0  0  2  0  0  0  0  0  0  0  0  0
    6.9120   -0.5065   -0.5335 C   0  0  1  0  0  0  0  0  0  0  0  0
    5.4974   -1.0276   -0.9704 C   0  0  2  0  0  0  0  0  0  0  0  0
    5.3266   -2.5554   -0.7400 C   0  0  0  0  0  0  0  0  0  0  0  0
    5.6702   -2.9966    0.9959 S   0  0  0  0  0  0  0  0  0  0  0  0
    5.7786   -4.5868    1.1639 O   0  0  0  0  0  0  0  0  0  0  0  0
    4.5160   -2.4187    1.9467 O   0  0  0  0  0  0  0  0  0  0  0  0
    6.9716    0.8867   -0.8457 O   0  0  0  0  0  0  0  0  0  0  0  0
    5.2669   -0.6923   -2.4096 N   0  0  0  0  0  0  0  0  0  0  0  0
    8.6361   -0.0353    1.3715 C   0  0  0  0  0  0  0  0  0  0  0  0
    3.8749   -0.8369   -2.9125 C   0  0  0  0  0  0  0  0  0  0  0  0
    3.7393   -0.3422   -4.3074 C   0  0  0  0  0  0  0  0  0  0  0  0
    3.2753    0.9670   -4.5846 C   0  0  0  0  0  0  0  0  0  0  0  0
    3.1077    1.4369   -5.9125 C   0  0  0  0  0  0  0  0  0  0  0  0
    3.4284    0.5577   -6.9752 C   0  0  0  0  0  0  0  0  0  0  0  0
    3.8901   -0.7440   -6.7170 C   0  0  0  0  0  0  0  0  0  0  0  0
    4.0451   -1.1916   -5.3945 C   0  0  0  0  0  0  0  0  0  0  0  0
    8.9297   -0.1069    2.8326 C   0  0  0  0  0  0  0  0  0  0  0  0
    9.7094   -1.1643    3.3626 C   0  0  0  0  0  0  0  0  0  0  0  0
    9.8790   -1.3051    4.7519 C   0  0  0  0  0  0  0  0  0  0  0  0
    9.2993   -0.3712    5.6285 C   0  0  0  0  0  0  0  0  0  0  0  0
    8.5659    0.7122    5.1129 C   0  0  0  0  0  0  0  0  0  0  0  0
    8.3782    0.8431    3.7249 C   0  0  0  0  0  0  0  0  0  0  0  0
    2.5956    2.8202   -6.1976 C   0  0  0  0  0  0  0  0  0  0  0  0
    3.5916    3.9113   -5.7217 C   0  0  0  0  0  0  0  0  0  0  0  0
    1.1641    3.0504   -5.6379 C   0  0  0  0  0  0  0  0  0  0  0  0
   10.8470   -2.7413    5.4286 Br  0  0  0  0  0  0  0  0  0  0  0  0
    8.0595   -2.7347    0.8802 H   0  0  0  0  0  0  0  0  0  0  0  0
    7.3993   -2.3309    2.4773 H   0  0  0  0  0  0  0  0  0  0  0  0
    6.4813   -0.1934    1.5681 H   0  0  0  0  0  0  0  0  0  0  0  0
    7.6767   -1.0055   -1.1359 H   0  0  0  0  0  0  0  0  0  0  0  0
    4.7537   -0.4982   -0.3652 H   0  0  0  0  0  0  0  0  0  0  0  0
    4.3072   -2.8748   -0.9561 H   0  0  0  0  0  0  0  0  0  0  0  0
    6.0168   -3.1045   -1.3823 H   0  0  0  0  0  0  0  0  0  0  0  0
    6.8725    0.9404   -1.8197 H   0  0  0  0  0  0  0  0  0  0  0  0
    5.8662   -1.3033   -2.9697 H   0  0  0  0  0  0  0  0  0  0  0  0
    9.4383   -0.5173    0.8042 H   0  0  0  0  0  0  0  0  0  0  0  0
    8.6397    1.0150    1.0692 H   0  0  0  0  0  0  0  0  0  0  0  0
    3.5713   -1.8865   -2.8909 H   0  0  0  0  0  0  0  0  0  0  0  0
    3.1897   -0.2882   -2.2613 H   0  0  0  0  0  0  0  0  0  0  0  0
    3.0468    1.5876   -3.8044 H   0  0  0  0  0  0  0  0  0  0  0  0
    3.3252    0.8536   -7.9518 H   0  0  0  0  0  0  0  0  0  0  0  0
    4.1047   -1.3729   -7.4954 H   0  0  0  0  0  0  0  0  0  0  0  0
    4.3723   -2.1480   -5.2344 H   0  0  0  0  0  0  0  0  0  0  0  0
   10.1300   -1.8597    2.7412 H   0  0  0  0  0  0  0  0  0  0  0  0
    9.4066   -0.4809    6.6393 H   0  0  0  0  0  0  0  0  0  0  0  0
    8.1606    1.4007    5.7474 H   0  0  0  0  0  0  0  0  0  0  0  0
    7.8300    1.6318    3.3702 H   0  0  0  0  0  0  0  0  0  0  0  0
    2.5082    2.9541   -7.2812 H   0  0  0  0  0  0  0  0  0  0  0  0
    3.2472    4.8992   -6.0346 H   0  0  0  0  0  0  0  0  0  0  0  0
    3.6952    3.9084   -4.6355 H   0  0  0  0  0  0  0  0  0  0  0  0
    4.5736    3.7425   -6.1671 H   0  0  0  0  0  0  0  0  0  0  0  0
    0.7829    4.0223   -5.9597 H   0  0  0  0  0  0  0  0  0  0  0  0
    1.1543    3.0219   -4.5471 H   0  0  0  0  0  0  0  0  0  0  0  0
    0.4833    2.2845   -6.0141 H   0  0  0  0  0  0  0  0  0  0  0  0
  1 29  1  0  0  0  0
  1 30  1  0  0  0  0
  2  1  1  0  0  0  0
  2 11  1  0  0  0  0
  2 31  1  1  0  0  0
  3  2  1  0  0  0  0
  3  4  1  0  0  0  0
  3  9  1  0  0  0  0
  3 32  1  6  0  0  0
  4  5  1  0  0  0  0
  4 10  1  0  0  0  0
  4 33  1  1  0  0  0
  5  6  1  0  0  0  0
  5 34  1  0  0  0  0
  5 35  1  0  0  0  0
  6  1  1  0  0  0  0
  6  7  2  0  0  0  0
  6  8  2  0  0  0  0
  9 36  1  0  0  0  0
 10 12  1  0  0  0  0
 10 37  1  0  0  0  0
 11 19  1  0  0  0  0
 11 38  1  0  0  0  0
 11 39  1  0  0  0  0
 12 13  1  0  0  0  0
 12 40  1  0  0  0  0
 12 41  1  0  0  0  0
 13 14  2  0  0  0  0
 14 15  1  0  0  0  0
 14 42  1  0  0  0  0
 15 16  2  0  0  0  0
 15 25  1  0  0  0  0
 16 17  1  0  0  0  0
 16 43  1  0  0  0  0
 17 18  2  0  0  0  0
 17 44  1  0  0  0  0
 18 13  1  0  0  0  0
 18 45  1  0  0  0  0
 19 20  2  0  0  0  0
 20 21  1  0  0  0  0
 20 46  1  0  0  0  0
 21 22  2  0  0  0  0
 21 28  1  0  0  0  0
 22 23  1  0  0  0  0
 22 47  1  0  0  0  0
 23 24  2  0  0  0  0
 23 48  1  0  0  0  0
 24 19  1  0  0  0  0
 24 49  1  0  0  0  0
 25 26  1  0  0  0  0
 25 27  1  0  0  0  0
 25 50  1  0  0  0  0
 26 51  1  0  0  0  0
 26 52  1  0  0  0  0
 26 53  1  0  0  0  0
 27 54  1  0  0  0  0
 27 55  1  0  0  0  0
 27 56  1  0  0  0  0
M  END
$$$$
Dataset (3)
 OpenBabel02101614293D

 66 68  0  0  0  0  0  0  0  0999 V2000
    7.8634   -2.4676    0.9126 C   0  0  0  0  0  0  0  0  0  0  0  0
    7.8079   -0.9252    0.6742 C   0  0  2  0  0  0  0  0  0  0  0  0
    7.0405   -0.5770   -0.6575 C   0  0  1  0  0  0  0  0  0  0  0  0
    5.5377   -1.0331   -0.7017 C   0  0  2  0  0  0  0  0  0  0  0  0
    5.3793   -2.5793   -0.5983 C   0  0  0  0  0  0  0  0  0  0  0  0
    6.2011   -3.2082    0.9016 S   0  0  0  0  0  0  0  0  0  0  0  0
    6.3089   -4.8063    0.8533 O   0  0  0  0  0  0  0  0  0  0  0  0
    5.3970   -2.7335    2.2058 O   0  0  0  0  0  0  0  0  0  0  0  0
    7.0887    0.8376   -0.8682 O   0  0  0  0  0  0  0  0  0  0  0  0
    4.9041   -0.5320   -1.9553 N   0  0  0  0  0  0  0  0  0  0  0  0
    9.2598   -0.3258    0.7108 C   0  0  0  0  0  0  0  0  0  0  0  0
    3.4302   -0.6672   -2.0602 C   0  0  0  0  0  0  0  0  0  0  0  0
    2.9452   -0.0497   -3.3174 C   0  0  0  0  0  0  0  0  0  0  0  0
    2.4955    1.2897   -3.3315 C   0  0  0  0  0  0  0  0  0  0  0  0
    1.9616    1.8836   -4.5024 C   0  0  0  0  0  0  0  0  0  0  0  0
    1.9115    1.1066   -5.6844 C   0  0  0  0  0  0  0  0  0  0  0  0
    2.3892   -0.2166   -5.6957 C   0  0  0  0  0  0  0  0  0  0  0  0
    2.9051   -0.7932   -4.5199 C   0  0  0  0  0  0  0  0  0  0  0  0
    9.9514   -0.5606    2.0145 C   0  0  0  0  0  0  0  0  0  0  0  0
   10.7685   -1.7019    2.2060 C   0  0  0  0  0  0  0  0  0  0  0  0
   11.2498   -2.0384    3.4896 C   0  0  0  0  0  0  0  0  0  0  0  0
   11.0310   -1.1574    4.5685 C   0  0  0  0  0  0  0  0  0  0  0  0
   10.2828    0.0180    4.3748 C   0  0  0  0  0  0  0  0  0  0  0  0
    9.7285    0.3038    3.1130 C   0  0  0  0  0  0  0  0  0  0  0  0
    1.4582    3.2939   -4.4899 C   0  0  0  0  0  0  0  0  0  0  0  0
    2.6012    4.3046   -4.1943 C   0  0  0  0  0  0  0  0  0  0  0  0
    0.2733    3.4596   -3.4977 C   0  0  0  0  0  0  0  0  0  0  0  0
   11.8939   -3.2327    3.6865 O   0  0  0  0  0  0  0  0  0  0  0  0
   10.9714   -4.2949    4.0288 C   0  0  0  0  0  0  0  0  0  0  0  0
   11.7420   -5.6248    4.2013 C   0  0  0  0  0  0  0  0  0  0  0  0
   10.8372   -6.7980    4.6468 C   0  0  0  0  0  0  0  0  0  0  0  0
    8.4642   -2.9544    0.1400 H   0  0  0  0  0  0  0  0  0  0  0  0
    8.2783   -2.7054    1.8904 H   0  0  0  0  0  0  0  0  0  0  0  0
    7.2479   -0.4735    1.5007 H   0  0  0  0  0  0  0  0  0  0  0  0
    7.5699   -1.0403   -1.4947 H   0  0  0  0  0  0  0  0  0  0  0  0
    5.0246   -0.5661    0.1456 H   0  0  0  0  0  0  0  0  0  0  0  0
    4.3343   -2.8744   -0.5250 H   0  0  0  0  0  0  0  0  0  0  0  0
    5.8144   -3.0630   -1.4750 H   0  0  0  0  0  0  0  0  0  0  0  0
    6.7588    0.9785   -1.7815 H   0  0  0  0  0  0  0  0  0  0  0  0
    5.3168   -1.0456   -2.7349 H   0  0  0  0  0  0  0  0  0  0  0  0
    9.2260    0.7515    0.5262 H   0  0  0  0  0  0  0  0  0  0  0  0
    9.8410   -0.7568   -0.1095 H   0  0  0  0  0  0  0  0  0  0  0  0
    3.1318   -1.7176   -2.0594 H   0  0  0  0  0  0  0  0  0  0  0  0
    2.9563   -0.1978   -1.1925 H   0  0  0  0  0  0  0  0  0  0  0  0
    2.5518    1.8363   -2.4684 H   0  0  0  0  0  0  0  0  0  0  0  0
    1.5299    1.5016   -6.5493 H   0  0  0  0  0  0  0  0  0  0  0  0
    2.3560   -0.7611   -6.5622 H   0  0  0  0  0  0  0  0  0  0  0  0
    3.2423   -1.7617   -4.5452 H   0  0  0  0  0  0  0  0  0  0  0  0
   10.9698   -2.3271    1.4195 H   0  0  0  0  0  0  0  0  0  0  0  0
   11.4032   -1.3745    5.4974 H   0  0  0  0  0  0  0  0  0  0  0  0
   10.1308    0.6597    5.1555 H   0  0  0  0  0  0  0  0  0  0  0  0
    9.1546    1.1441    3.0003 H   0  0  0  0  0  0  0  0  0  0  0  0
    1.0683    3.5552   -5.4813 H   0  0  0  0  0  0  0  0  0  0  0  0
    2.2318    5.3285   -4.2742 H   0  0  0  0  0  0  0  0  0  0  0  0
    2.9997    4.1638   -3.1881 H   0  0  0  0  0  0  0  0  0  0  0  0
    3.4156    4.1807   -4.9118 H   0  0  0  0  0  0  0  0  0  0  0  0
   -0.1392    4.4671   -3.5654 H   0  0  0  0  0  0  0  0  0  0  0  0
    0.5946    3.2923   -2.4679 H   0  0  0  0  0  0  0  0  0  0  0  0
   -0.5217    2.7487   -3.7337 H   0  0  0  0  0  0  0  0  0  0  0  0
   10.4558   -4.0612    4.9674 H   0  0  0  0  0  0  0  0  0  0  0  0
   10.2236   -4.4272    3.2382 H   0  0  0  0  0  0  0  0  0  0  0  0
   12.2155   -5.8866    3.2514 H   0  0  0  0  0  0  0  0  0  0  0  0
   12.5297   -5.4851    4.9459 H   0  0  0  0  0  0  0  0  0  0  0  0
   11.4335   -7.7059    4.7586 H   0  0  0  0  0  0  0  0  0  0  0  0
   10.0591   -6.9838    3.9036 H   0  0  0  0  0  0  0  0  0  0  0  0
   10.3662   -6.5737    5.6061 H   0  0  0  0  0  0  0  0  0  0  0  0
  1 32  1  0  0  0  0
  1 33  1  0  0  0  0
  2  1  1  0  0  0  0
  2 11  1  0  0  0  0
  2 34  1  1  0  0  0
  3  2  1  0  0  0  0
  3  4  1  0  0  0  0
  3  9  1  0  0  0  0
  3 35  1  6  0  0  0
  4  5  1  0  0  0  0
  4 10  1  0  0  0  0
  4 36  1  1  0  0  0
  5  6  1  0  0  0  0
  5 37  1  0  0  0  0
  5 38  1  0  0  0  0
  6  1  1  0  0  0  0
  6  7  2  0  0  0  0
  6  8  2  0  0  0  0
  9 39  1  0  0  0  0
 10 12  1  0  0  0  0
 10 40  1  0  0  0  0
 11 19  1  0  0  0  0
 11 41  1  0  0  0  0
 11 42  1  0  0  0  0
 12 13  1  0  0  0  0
 12 43  1  0  0  0  0
 12 44  1  0  0  0  0
 13 14  2  0  0  0  0
 14 15  1  0  0  0  0
 14 45  1  0  0  0  0
 15 16  2  0  0  0  0
 15 25  1  0  0  0  0
 16 17  1  0  0  0  0
 16 46  1  0  0  0  0
 17 18  2  0  0  0  0
 17 47  1  0  0  0  0
 18 13  1  0  0  0  0
 18 48  1  0  0  0  0
 19 20  2  0  0  0  0
 20 21  1  0  0  0  0
 20 49  1  0  0  0  0
 21 22  2  0  0  0  0
 21 28  1  0  0  0  0
 22 23  1  0  0  0  0
 22 50  1  0  0  0  0
 23 24  2  0  0  0  0
 23 51  1  0  0  0  0
 24 19  1  0  0  0  0
 24 52  1  0  0  0  0
 25 26  1  0  0  0  0
 25 27  1  0  0  0  0
 25 53  1  0  0  0  0
 26 54  1  0  0  0  0
 26 55  1  0  0  0  0
 26 56  1  0  0  0  0
 27 57  1  0  0  0  0
 27 58  1  0  0  0  0
 27 59  1  0  0  0  0
 28 29  1  0  0  0  0
 29 30  1  0  0  0  0
 29 60  1  0  0  0  0
 29 61  1  0  0  0  0
 30 31  1  0  0  0  0
 30 62  1  0  0  0  0
 30 63  1  0  0  0  0
 31 64  1  0  0  0  0
 31 65  1  0  0  0  0
 31 66  1  0  0  0  0
M  END
$$$$
Dataset (4)
 OpenBabel02101614293D

 69 71  0  0  0  0  0  0  0  0999 V2000
   -1.6641    4.3149    3.8570 C   0  0  0  0  0  0  0  0  0  0  0  0
   -3.0847    4.9144    4.1094 C   0  0  2  0  0  0  0  0  0  0  0  0
   -3.2256    5.4695    5.5784 C   0  0  1  0  0  0  0  0  0  0  0  0
   -2.2362    6.6342    5.9467 C   0  0  2  0  0  0  0  0  0  0  0  0
   -0.7421    6.2031    5.8728 C   0  0  0  0  0  0  0  0  0  0  0  0
   -0.3552    5.5283    4.2227 S   0  0  0  0  0  0  0  0  0  0  0  0
    1.0752    4.8047    4.2350 O   0  0  0  0  0  0  0  0  0  0  0  0
   -0.3856    6.7005    3.1282 O   0  0  0  0  0  0  0  0  0  0  0  0
   -4.5645    5.9330    5.7839 O   0  0  0  0  0  0  0  0  0  0  0  0
   -2.5595    7.1387    7.3129 N   0  0  0  0  0  0  0  0  0  0  0  0
   -4.1850    3.8507    3.7584 C   0  0  0  0  0  0  0  0  0  0  0  0
   -1.9107    8.4052    7.7329 C   0  0  0  0  0  0  0  0  0  0  0  0
   -2.4103    8.8291    9.0646 C   0  0  0  0  0  0  0  0  0  0  0  0
   -3.4818    9.7453    9.1731 C   0  0  0  0  0  0  0  0  0  0  0  0
   -3.9358   10.2171   10.4315 C   0  0  0  0  0  0  0  0  0  0  0  0
   -3.2981    9.7229   11.5961 C   0  0  0  0  0  0  0  0  0  0  0  0
   -2.2493    8.7901   11.5089 C   0  0  0  0  0  0  0  0  0  0  0  0
   -1.8104    8.3461   10.2500 C   0  0  0  0  0  0  0  0  0  0  0  0
   -4.1123    3.3868    2.3398 C   0  0  0  0  0  0  0  0  0  0  0  0
   -3.3663    2.2338    1.9887 C   0  0  0  0  0  0  0  0  0  0  0  0
   -3.1340    1.8887    0.6359 C   0  0  0  0  0  0  0  0  0  0  0  0
   -3.7332    2.6775   -0.3717 C   0  0  0  0  0  0  0  0  0  0  0  0
   -4.5384    3.7811   -0.0376 C   0  0  0  0  0  0  0  0  0  0  0  0
   -4.7174    4.1411    1.3093 C   0  0  0  0  0  0  0  0  0  0  0  0
   -5.0572   11.2118   10.5280 C   0  0  0  0  0  0  0  0  0  0  0  0
   -4.6924   12.5480    9.8221 C   0  0  0  0  0  0  0  0  0  0  0  0
   -6.3961   10.6238   10.0007 C   0  0  0  0  0  0  0  0  0  0  0  0
   -2.2658    0.7378    0.2773 C   0  0  0  0  0  0  0  0  0  0  0  0
   -0.9122    1.1941    0.0673 O   0  0  0  0  0  0  0  0  0  0  0  0
    0.0261    0.1334   -0.2176 C   0  0  0  0  0  0  0  0  0  0  0  0
    1.4441    0.7131   -0.4341 C   0  0  0  0  0  0  0  0  0  0  0  0
    2.4890   -0.3704   -0.7906 C   0  0  0  0  0  0  0  0  0  0  0  0
   -1.5039    3.4333    4.4833 H   0  0  0  0  0  0  0  0  0  0  0  0
   -1.5292    4.0326    2.8141 H   0  0  0  0  0  0  0  0  0  0  0  0
   -3.2201    5.7595    3.4235 H   0  0  0  0  0  0  0  0  0  0  0  0
   -3.0682    4.6415    6.2760 H   0  0  0  0  0  0  0  0  0  0  0  0
   -2.4046    7.4478    5.2326 H   0  0  0  0  0  0  0  0  0  0  0  0
   -0.0754    7.0503    6.0323 H   0  0  0  0  0  0  0  0  0  0  0  0
   -0.5346    5.4465    6.6337 H   0  0  0  0  0  0  0  0  0  0  0  0
   -4.6378    6.0959    6.7486 H   0  0  0  0  0  0  0  0  0  0  0  0
   -2.2868    6.4145    7.9817 H   0  0  0  0  0  0  0  0  0  0  0  0
   -5.1775    4.2742    3.9344 H   0  0  0  0  0  0  0  0  0  0  0  0
   -4.0880    2.9995    4.4387 H   0  0  0  0  0  0  0  0  0  0  0  0
   -0.8290    8.2837    7.7930 H   0  0  0  0  0  0  0  0  0  0  0  0
   -2.1026    9.1847    6.9900 H   0  0  0  0  0  0  0  0  0  0  0  0
   -3.9348   10.0773    8.3162 H   0  0  0  0  0  0  0  0  0  0  0  0
   -3.5978   10.0347   12.5221 H   0  0  0  0  0  0  0  0  0  0  0  0
   -1.8057    8.4346   12.3602 H   0  0  0  0  0  0  0  0  0  0  0  0
   -1.0425    7.6728   10.2013 H   0  0  0  0  0  0  0  0  0  0  0  0
   -2.9551    1.6602    2.7307 H   0  0  0  0  0  0  0  0  0  0  0  0
   -3.5888    2.4504   -1.3583 H   0  0  0  0  0  0  0  0  0  0  0  0
   -4.9858    4.3298   -0.7754 H   0  0  0  0  0  0  0  0  0  0  0  0
   -5.2815    4.9653    1.5338 H   0  0  0  0  0  0  0  0  0  0  0  0
   -5.2347   11.4650   11.5803 H   0  0  0  0  0  0  0  0  0  0  0  0
   -5.4741   13.2918    9.9851 H   0  0  0  0  0  0  0  0  0  0  0  0
   -4.5771   12.4122    8.7452 H   0  0  0  0  0  0  0  0  0  0  0  0
   -3.7558   12.9416   10.2229 H   0  0  0  0  0  0  0  0  0  0  0  0
   -7.2131   11.3286   10.1647 H   0  0  0  0  0  0  0  0  0  0  0  0
   -6.3447   10.4115    8.9318 H   0  0  0  0  0  0  0  0  0  0  0  0
   -6.6362    9.6977   10.5268 H   0  0  0  0  0  0  0  0  0  0  0  0
   -2.2936   -0.0074    1.0768 H   0  0  0  0  0  0  0  0  0  0  0  0
   -2.6433    0.2569   -0.6297 H   0  0  0  0  0  0  0  0  0  0  0  0
   -0.2791   -0.4052   -1.1197 H   0  0  0  0  0  0  0  0  0  0  0  0
    0.0597   -0.5686    0.6207 H   0  0  0  0  0  0  0  0  0  0  0  0
    1.4115    1.4486   -1.2417 H   0  0  0  0  0  0  0  0  0  0  0  0
    1.7647    1.2231    0.4780 H   0  0  0  0  0  0  0  0  0  0  0  0
    3.4678    0.0900   -0.9393 H   0  0  0  0  0  0  0  0  0  0  0  0
    2.5699   -1.1026    0.0153 H   0  0  0  0  0  0  0  0  0  0  0  0
    2.2061   -0.8853   -1.7110 H   0  0  0  0  0  0  0  0  0  0  0  0
  1 33  1  0  0  0  0
  1 34  1  0  0  0  0
  2  1  1  0  0  0  0
  2 11  1  0  0  0  0
  2 35  1  6  0  0  0
  3  2  1  0  0  0  0
  3  4  1  0  0  0  0
  3  9  1  0  0  0  0
  3 36  1  1  0  0  0
  4  5  1  0  0  0  0
  4 10  1  0  0  0  0
  4 37  1  6  0  0  0
  5  6  1  0  0  0  0
  5 38  1  0  0  0  0
  5 39  1  0  0  0  0
  6  1  1  0  0  0  0
  6  7  2  0  0  0  0
  6  8  2  0  0  0  0
  9 40  1  0  0  0  0
 10 12  1  0  0  0  0
 10 41  1  0  0  0  0
 11 19  1  0  0  0  0
 11 42  1  0  0  0  0
 11 43  1  0  0  0  0
 12 13  1  0  0  0  0
 12 44  1  0  0  0  0
 12 45  1  0  0  0  0
 13 14  2  0  0  0  0
 14 15  1  0  0  0  0
 14 46  1  0  0  0  0
 15 16  2  0  0  0  0
 15 25  1  0  0  0  0
 16 17  1  0  0  0  0
 16 47  1  0  0  0  0
 17 18  2  0  0  0  0
 17 48  1  0  0  0  0
 18 13  1  0  0  0  0
 18 49  1  0  0  0  0
 19 20  2  0  0  0  0
 20 21  1  0  0  0  0
 20 50  1  0  0  0  0
 21 22  2  0  0  0  0
 21 28  1  0  0  0  0
 22 23  1  0  0  0  0
 22 51  1  0  0  0  0
 23 24  2  0  0  0  0
 23 52  1  0  0  0  0
 24 19  1  0  0  0  0
 24 53  1  0  0  0  0
 25 26  1  0  0  0  0
 25 27  1  0  0  0  0
 25 54  1  0  0  0  0
 26 55  1  0  0  0  0
 26 56  1  0  0  0  0
 26 57  1  0  0  0  0
 27 58  1  0  0  0  0
 27 59  1  0  0  0  0
 27 60  1  0  0  0  0
 28 29  1  0  0  0  0
 28 61  1  0  0  0  0
 28 62  1  0  0  0  0
 29 30  1  0  0  0  0
 30 31  1  0  0  0  0
 30 63  1  0  0  0  0
 30 64  1  0  0  0  0
 31 32  1  0  0  0  0
 31 65  1  0  0  0  0
 31 66  1  0  0  0  0
 32 67  1  0  0  0  0
 32 68  1  0  0  0  0
 32 69  1  0  0  0  0
M  END
$$$$
Dataset (5)
 OpenBabel02101614293D

 60 62  0  0  0  0  0  0  0  0999 V2000
    7.1517   -2.0760    1.4662 C   0  0  0  0  0  0  0  0  0  0  0  0
    7.2473   -0.5669    1.0765 C   0  0  2  0  0  0  0  0  0  0  0  0
    6.9100   -0.3351   -0.4473 C   0  0  1  0  0  0  0  0  0  0  0  0
    5.4683   -0.7667   -0.8945 C   0  0  2  0  0  0  0  0  0  0  0  0
    5.2069   -2.2846   -0.6892 C   0  0  0  0  0  0  0  0  0  0  0  0
    5.5180   -2.7697    1.0440 S   0  0  0  0  0  0  0  0  0  0  0  0
    5.5385   -4.3659    1.1951 O   0  0  0  0  0  0  0  0  0  0  0  0
    4.3983   -2.1339    1.9997 O   0  0  0  0  0  0  0  0  0  0  0  0
    7.0595    1.0541   -0.7452 O   0  0  0  0  0  0  0  0  0  0  0  0
    5.2591   -0.3976   -2.3281 N   0  0  0  0  0  0  0  0  0  0  0  0
    8.6581   -0.0019    1.4767 C   0  0  0  0  0  0  0  0  0  0  0  0
    3.8656   -0.4404   -2.8435 C   0  0  0  0  0  0  0  0  0  0  0  0
    3.7890    0.0942   -4.2308 C   0  0  0  0  0  0  0  0  0  0  0  0
    3.4189    1.4392   -4.4820 C   0  0  0  0  0  0  0  0  0  0  0  0
    3.2949    1.9472   -5.8018 C   0  0  0  0  0  0  0  0  0  0  0  0
    3.5697    1.0685   -6.8801 C   0  0  0  0  0  0  0  0  0  0  0  0
    3.9485   -0.2653   -6.6480 C   0  0  0  0  0  0  0  0  0  0  0  0
    4.0577   -0.7483   -5.3340 C   0  0  0  0  0  0  0  0  0  0  0  0
    8.9529   -0.1253    2.9368 C   0  0  0  0  0  0  0  0  0  0  0  0
    9.6615   -1.2426    3.4424 C   0  0  0  0  0  0  0  0  0  0  0  0
    9.8326   -1.4292    4.8264 C   0  0  0  0  0  0  0  0  0  0  0  0
    9.3517   -0.4604    5.7330 C   0  0  0  0  0  0  0  0  0  0  0  0
    8.6815    0.6765    5.2369 C   0  0  0  0  0  0  0  0  0  0  0  0
    8.4728    0.8368    3.8548 C   0  0  0  0  0  0  0  0  0  0  0  0
    2.8765    3.3664   -6.0604 C   0  0  0  0  0  0  0  0  0  0  0  0
    3.9357    4.3833   -5.5553 C   0  0  0  0  0  0  0  0  0  0  0  0
    1.4583    3.6730   -5.5014 C   0  0  0  0  0  0  0  0  0  0  0  0
   10.6599   -2.9850    5.4288 Br  0  0  0  0  0  0  0  0  0  0  0  0
    9.4850   -0.6318    7.0849 O   0  0  0  0  0  0  0  0  0  0  0  0
   10.7203   -0.1067    7.6012 C   0  0  0  0  0  0  0  0  0  0  0  0
    7.9181   -2.6466    0.9360 H   0  0  0  0  0  0  0  0  0  0  0  0
    7.2792   -2.2273    2.5388 H   0  0  0  0  0  0  0  0  0  0  0  0
    6.4965   -0.0243    1.6606 H   0  0  0  0  0  0  0  0  0  0  0  0
    7.6462   -0.8707   -1.0533 H   0  0  0  0  0  0  0  0  0  0  0  0
    4.7543   -0.2083   -0.2812 H   0  0  0  0  0  0  0  0  0  0  0  0
    4.1732   -2.5418   -0.9182 H   0  0  0  0  0  0  0  0  0  0  0  0
    5.8678   -2.8641   -1.3356 H   0  0  0  0  0  0  0  0  0  0  0  0
    6.9840    1.1209   -1.7199 H   0  0  0  0  0  0  0  0  0  0  0  0
    5.8226   -1.0362   -2.8978 H   0  0  0  0  0  0  0  0  0  0  0  0
    9.4288   -0.5193    0.8973 H   0  0  0  0  0  0  0  0  0  0  0  0
    8.7281    1.0522    1.1968 H   0  0  0  0  0  0  0  0  0  0  0  0
    3.4946   -1.4681   -2.8403 H   0  0  0  0  0  0  0  0  0  0  0  0
    3.2099    0.1400   -2.1902 H   0  0  0  0  0  0  0  0  0  0  0  0
    3.2267    2.0554   -3.6872 H   0  0  0  0  0  0  0  0  0  0  0  0
    3.4953    1.3889   -7.8495 H   0  0  0  0  0  0  0  0  0  0  0  0
    4.1369   -0.8895   -7.4353 H   0  0  0  0  0  0  0  0  0  0  0  0
    4.3226   -1.7263   -5.1896 H   0  0  0  0  0  0  0  0  0  0  0  0
   10.0245   -1.9534    2.8030 H   0  0  0  0  0  0  0  0  0  0  0  0
    8.3293    1.3863    5.8834 H   0  0  0  0  0  0  0  0  0  0  0  0
    7.9565    1.6561    3.5255 H   0  0  0  0  0  0  0  0  0  0  0  0
    2.8041    3.5276   -7.1402 H   0  0  0  0  0  0  0  0  0  0  0  0
    3.6565    5.3962   -5.8528 H   0  0  0  0  0  0  0  0  0  0  0  0
    4.0286    4.3563   -4.4678 H   0  0  0  0  0  0  0  0  0  0  0  0
    4.9096    4.1591   -5.9954 H   0  0  0  0  0  0  0  0  0  0  0  0
    1.1387    4.6725   -5.8061 H   0  0  0  0  0  0  0  0  0  0  0  0
    1.4408    3.6264   -4.4104 H   0  0  0  0  0  0  0  0  0  0  0  0
    0.7342    2.9545   -5.8935 H   0  0  0  0  0  0  0  0  0  0  0  0
   10.7420   -0.2947    8.6749 H   0  0  0  0  0  0  0  0  0  0  0  0
   11.5855   -0.6020    7.1521 H   0  0  0  0  0  0  0  0  0  0  0  0
   10.7924    0.9722    7.4401 H   0  0  0  0  0  0  0  0  0  0  0  0
  1 31  1  0  0  0  0
  1 32  1  0  0  0  0
  2  1  1  0  0  0  0
  2 11  1  0  0  0  0
  2 33  1  1  0  0  0
  3  2  1  0  0  0  0
  3  4  1  0  0  0  0
  3  9  1  0  0  0  0
  3 34  1  6  0  0  0
  4  5  1  0  0  0  0
  4 10  1  0  0  0  0
  4 35  1  1  0  0  0
  5  6  1  0  0  0  0
  5 36  1  0  0  0  0
  5 37  1  0  0  0  0
  6  1  1  0  0  0  0
  6  7  2  0  0  0  0
  6  8  2  0  0  0  0
  9 38  1  0  0  0  0
 10 12  1  0  0  0  0
 10 39  1  0  0  0  0
 11 19  1  0  0  0  0
 11 40  1  0  0  0  0
 11 41  1  0  0  0  0
 12 13  1  0  0  0  0
 12 42  1  0  0  0  0
 12 43  1  0  0  0  0
 13 14  2  0  0  0  0
 14 15  1  0  0  0  0
 14 44  1  0  0  0  0
 15 16  2  0  0  0  0
 15 25  1  0  0  0  0
 16 17  1  0  0  0  0
 16 45  1  0  0  0  0
 17 18  2  0  0  0  0
 17 46  1  0  0  0  0
 18 13  1  0  0  0  0
 18 47  1  0  0  0  0
 19 20  2  0  0  0  0
 20 21  1  0  0  0  0
 20 48  1  0  0  0  0
 21 22  2  0  0  0  0
 21 28  1  0  0  0  0
 22 23  1  0  0  0  0
 22 29  1  0  0  0  0
 23 24  2  0  0  0  0
 23 49  1  0  0  0  0
 24 19  1  0  0  0  0
 24 50  1  0  0  0  0
 25 26  1  0  0  0  0
 25 27  1  0  0  0  0
 25 51  1  0  0  0  0
 26 52  1  0  0  0  0
 26 53  1  0  0  0  0
 26 54  1  0  0  0  0
 27 55  1  0  0  0  0
 27 56  1  0  0  0  0
 27 57  1  0  0  0  0
 29 30  1  0  0  0  0
 30 58  1  0  0  0  0
 30 59  1  0  0  0  0
 30 60  1  0  0  0  0
M  END
$$$$
Dataset (6)
 OpenBabel02101614293D

 57 59  0  0  0  0  0  0  0  0999 V2000
    7.8575   -2.5199    0.9382 C   0  0  0  0  0  0  0  0  0  0  0  0
    7.8029   -0.9799    0.6989 C   0  0  2  0  0  0  0  0  0  0  0  0
    7.0452   -0.6203   -0.6359 C   0  0  1  0  0  0  0  0  0  0  0  0
    5.5422   -1.0722   -0.7019 C   0  0  2  0  0  0  0  0  0  0  0  0
    5.3789   -2.6143   -0.5912 C   0  0  0  0  0  0  0  0  0  0  0  0
    6.1855   -3.2433    0.9194 S   0  0  0  0  0  0  0  0  0  0  0  0
    6.2744   -4.8431    0.8917 O   0  0  0  0  0  0  0  0  0  0  0  0
    5.3796   -2.7559    2.2171 O   0  0  0  0  0  0  0  0  0  0  0  0
    7.0848    0.7968   -0.8305 O   0  0  0  0  0  0  0  0  0  0  0  0
    4.9268   -0.5840   -1.9732 N   0  0  0  0  0  0  0  0  0  0  0  0
    9.2546   -0.3858    0.7355 C   0  0  0  0  0  0  0  0  0  0  0  0
    3.4462   -0.6725   -2.0750 C   0  0  0  0  0  0  0  0  0  0  0  0
    2.9427   -0.0352   -3.3212 C   0  0  0  0  0  0  0  0  0  0  0  0
    2.4789    1.3012   -3.3272 C   0  0  0  0  0  0  0  0  0  0  0  0
    1.9589    1.9063   -4.4995 C   0  0  0  0  0  0  0  0  0  0  0  0
    1.9288    1.1361   -5.6868 C   0  0  0  0  0  0  0  0  0  0  0  0
    2.3897   -0.1902   -5.7011 C   0  0  0  0  0  0  0  0  0  0  0  0
    2.8925   -0.7711   -4.5263 C   0  0  0  0  0  0  0  0  0  0  0  0
    9.9521   -0.6093    2.0358 C   0  0  0  0  0  0  0  0  0  0  0  0
   10.8122   -1.7203    2.2176 C   0  0  0  0  0  0  0  0  0  0  0  0
   11.3601   -2.0092    3.4804 C   0  0  0  0  0  0  0  0  0  0  0  0
   11.0770   -1.1764    4.5775 C   0  0  0  0  0  0  0  0  0  0  0  0
   10.2776   -0.0322    4.3976 C   0  0  0  0  0  0  0  0  0  0  0  0
    9.7201    0.2492    3.1366 C   0  0  0  0  0  0  0  0  0  0  0  0
    1.4502    3.3179   -4.4931 C   0  0  0  0  0  0  0  0  0  0  0  0
    2.5865    4.3377   -4.2108 C   0  0  0  0  0  0  0  0  0  0  0  0
    0.2523    3.4989   -3.5207 C   0  0  0  0  0  0  0  0  0  0  0  0
   11.5593   -1.4829    5.8043 O   0  0  0  0  0  0  0  0  0  0  0  0
    8.4535   -3.0004    0.1604 H   0  0  0  0  0  0  0  0  0  0  0  0
    8.2924   -2.7602    1.9086 H   0  0  0  0  0  0  0  0  0  0  0  0
    7.2408   -0.5319    1.5254 H   0  0  0  0  0  0  0  0  0  0  0  0
    7.5859   -1.0701   -1.4736 H   0  0  0  0  0  0  0  0  0  0  0  0
    5.0225   -0.6047    0.1406 H   0  0  0  0  0  0  0  0  0  0  0  0
    4.3282   -2.9003   -0.5326 H   0  0  0  0  0  0  0  0  0  0  0  0
    5.8315   -3.0979   -1.4607 H   0  0  0  0  0  0  0  0  0  0  0  0
    6.7213    0.9497   -1.7299 H   0  0  0  0  0  0  0  0  0  0  0  0
    5.3253   -1.1324   -2.7392 H   0  0  0  0  0  0  0  0  0  0  0  0
    9.8378   -0.8243   -0.0788 H   0  0  0  0  0  0  0  0  0  0  0  0
    9.2227    0.6902    0.5471 H   0  0  0  0  0  0  0  0  0  0  0  0
    3.1340   -1.7199   -2.0724 H   0  0  0  0  0  0  0  0  0  0  0  0
    2.9873   -0.1979   -1.2029 H   0  0  0  0  0  0  0  0  0  0  0  0
    2.5160    1.8363   -2.4586 H   0  0  0  0  0  0  0  0  0  0  0  0
    1.5657    1.5332   -6.5563 H   0  0  0  0  0  0  0  0  0  0  0  0
    2.3571   -0.7338   -6.5666 H   0  0  0  0  0  0  0  0  0  0  0  0
    3.2158   -1.7412   -4.5583 H   0  0  0  0  0  0  0  0  0  0  0  0
   11.0211   -2.3490    1.4384 H   0  0  0  0  0  0  0  0  0  0  0  0
   11.9547   -2.8334    3.5988 H   0  0  0  0  0  0  0  0  0  0  0  0
   10.0904    0.5905    5.1863 H   0  0  0  0  0  0  0  0  0  0  0  0
    9.1312    1.0795    3.0315 H   0  0  0  0  0  0  0  0  0  0  0  0
    1.0647    3.5704   -5.4861 H   0  0  0  0  0  0  0  0  0  0  0  0
    2.2114    5.3602   -4.3075 H   0  0  0  0  0  0  0  0  0  0  0  0
    2.9878    4.2106   -3.2026 H   0  0  0  0  0  0  0  0  0  0  0  0
    3.3982    4.2055   -4.9306 H   0  0  0  0  0  0  0  0  0  0  0  0
   -0.1639    4.5057   -3.6114 H   0  0  0  0  0  0  0  0  0  0  0  0
    0.5607    3.3475   -2.4841 H   0  0  0  0  0  0  0  0  0  0  0  0
   -0.5378    2.7828   -3.7584 H   0  0  0  0  0  0  0  0  0  0  0  0
   10.8495   -2.0228    6.2137 H   0  0  0  0  0  0  0  0  0  0  0  0
  1 29  1  0  0  0  0
  1 30  1  0  0  0  0
  2  1  1  0  0  0  0
  2 11  1  0  0  0  0
  2 31  1  1  0  0  0
  3  2  1  0  0  0  0
  3  4  1  0  0  0  0
  3  9  1  0  0  0  0
  3 32  1  6  0  0  0
  4  5  1  0  0  0  0
  4 10  1  0  0  0  0
  4 33  1  1  0  0  0
  5  6  1  0  0  0  0
  5 34  1  0  0  0  0
  5 35  1  0  0  0  0
  6  1  1  0  0  0  0
  6  7  2  0  0  0  0
  6  8  2  0  0  0  0
  9 36  1  0  0  0  0
 10 12  1  0  0  0  0
 10 37  1  0  0  0  0
 11 19  1  0  0  0  0
 11 38  1  0  0  0  0
 11 39  1  0  0  0  0
 12 13  1  0  0  0  0
 12 40  1  0  0  0  0
 12 41  1  0  0  0  0
 13 14  2  0  0  0  0
 14 15  1  0  0  0  0
 14 42  1  0  0  0  0
 15 16  2  0  0  0  0
 15 25  1  0  0  0  0
 16 17  1  0  0  0  0
 16 43  1  0  0  0  0
 17 18  2  0  0  0  0
 17 44  1  0  0  0  0
 18 13  1  0  0  0  0
 18 45  1  0  0  0  0
 19 20  2  0  0  0  0
 20 21  1  0  0  0  0
 20 46  1  0  0  0  0
 21 22  2  0  0  0  0
 21 47  1  0  0  0  0
 22 23  1  0  0  0  0
 22 28  1  0  0  0  0
 23 24  2  0  0  0  0
 23 48  1  0  0  0  0
 24 19  1  0  0  0  0
 24 49  1  0  0  0  0
 25 26  1  0  0  0  0
 25 27  1  0  0  0  0
 25 50  1  0  0  0  0
 26 51  1  0  0  0  0
 26 52  1  0  0  0  0
 26 53  1  0  0  0  0
 27 54  1  0  0  0  0
 27 55  1  0  0  0  0
 27 56  1  0  0  0  0
 28 57  1  0  0  0  0
M  END
$$$$
Dataset (7)
 OpenBabel02101614293D

 70 73  0  0  0  0  0  0  0  0999 V2000
    7.8469   -2.4743    0.9114 C   0  0  0  0  0  0  0  0  0  0  0  0
    7.7786   -0.9331    0.6716 C   0  0  2  0  0  0  0  0  0  0  0  0
    7.0105   -0.5916   -0.6613 C   0  0  1  0  0  0  0  0  0  0  0  0
    5.5113   -1.0609   -0.7083 C   0  0  2  0  0  0  0  0  0  0  0  0
    5.3638   -2.6066   -0.6024 C   0  0  0  0  0  0  0  0  0  0  0  0
    6.1877   -3.2239    0.9028 S   0  0  0  0  0  0  0  0  0  0  0  0
    6.3095   -4.8219    0.8676 O   0  0  0  0  0  0  0  0  0  0  0  0
    5.3847   -2.7452    2.2058 O   0  0  0  0  0  0  0  0  0  0  0  0
    7.0500    0.8238   -0.8713 O   0  0  0  0  0  0  0  0  0  0  0  0
    4.8830   -0.5670   -1.9681 N   0  0  0  0  0  0  0  0  0  0  0  0
    9.2262   -0.3225    0.7153 C   0  0  0  0  0  0  0  0  0  0  0  0
    3.4074   -0.6789   -2.0735 C   0  0  0  0  0  0  0  0  0  0  0  0
    2.9304   -0.0443   -3.3280 C   0  0  0  0  0  0  0  0  0  0  0  0
    2.4818    1.2966   -3.3353 C   0  0  0  0  0  0  0  0  0  0  0  0
    1.9540    1.8963   -4.5082 C   0  0  0  0  0  0  0  0  0  0  0  0
    1.9088    1.1245   -5.6945 C   0  0  0  0  0  0  0  0  0  0  0  0
    2.3811   -0.1988   -5.7134 C   0  0  0  0  0  0  0  0  0  0  0  0
    2.8878   -0.7772   -4.5366 C   0  0  0  0  0  0  0  0  0  0  0  0
    9.9196   -0.5591    2.0188 C   0  0  0  0  0  0  0  0  0  0  0  0
   10.7215   -1.7098    2.2138 C   0  0  0  0  0  0  0  0  0  0  0  0
   11.2283   -2.0470    3.4903 C   0  0  0  0  0  0  0  0  0  0  0  0
   10.9900   -1.1702    4.5747 C   0  0  0  0  0  0  0  0  0  0  0  0
   10.2586    0.0155    4.3774 C   0  0  0  0  0  0  0  0  0  0  0  0
    9.7200    0.3148    3.1131 C   0  0  0  0  0  0  0  0  0  0  0  0
    1.4506    3.3088   -4.5009 C   0  0  0  0  0  0  0  0  0  0  0  0
    2.5905    4.3230   -4.2071 C   0  0  0  0  0  0  0  0  0  0  0  0
    0.2638    3.4801   -3.5127 C   0  0  0  0  0  0  0  0  0  0  0  0
   11.4354   -1.4473    5.8261 O   0  0  0  0  0  0  0  0  0  0  0  0
   13.2929   -3.2568    4.0578 C   0  0  0  0  0  0  0  0  0  0  0  0
   13.3641   -5.6874    3.9202 C   0  0  0  0  0  0  0  0  0  0  0  0
   12.0097   -5.7059    3.5420 C   0  0  0  0  0  0  0  0  0  0  0  0
   11.3005   -4.4996    3.4088 C   0  0  0  0  0  0  0  0  0  0  0  0
   11.9378   -3.2622    3.6575 C   0  0  0  0  0  0  0  0  0  0  0  0
   14.0179   -4.4615    4.1880 C   0  0  0  0  0  0  0  0  0  0  0  0
   15.4867   -4.4115    4.5725 C   0  0  0  0  0  0  0  0  0  0  0  0
    8.4517   -2.9544    0.1376 H   0  0  0  0  0  0  0  0  0  0  0  0
    8.2656   -2.7104    1.8886 H   0  0  0  0  0  0  0  0  0  0  0  0
    7.2137   -0.4854    1.4978 H   0  0  0  0  0  0  0  0  0  0  0  0
    7.5468   -1.0504   -1.4969 H   0  0  0  0  0  0  0  0  0  0  0  0
    4.9926   -0.5966    0.1376 H   0  0  0  0  0  0  0  0  0  0  0  0
    4.3187   -2.9069   -0.5366 H   0  0  0  0  0  0  0  0  0  0  0  0
    5.8135   -3.0843   -1.4756 H   0  0  0  0  0  0  0  0  0  0  0  0
    6.7315    0.9585   -1.7896 H   0  0  0  0  0  0  0  0  0  0  0  0
    5.2878   -1.0906   -2.7468 H   0  0  0  0  0  0  0  0  0  0  0  0
    9.8154   -0.7418   -0.1054 H   0  0  0  0  0  0  0  0  0  0  0  0
    9.1839    0.7553    0.5375 H   0  0  0  0  0  0  0  0  0  0  0  0
    3.0983   -1.7249   -2.0720 H   0  0  0  0  0  0  0  0  0  0  0  0
    2.9331   -0.2067   -1.2080 H   0  0  0  0  0  0  0  0  0  0  0  0
    2.5349    1.8391   -2.4681 H   0  0  0  0  0  0  0  0  0  0  0  0
    1.5332    1.5219   -6.5597 H   0  0  0  0  0  0  0  0  0  0  0  0
    2.3517   -0.7402   -6.5829 H   0  0  0  0  0  0  0  0  0  0  0  0
    3.2168   -1.7441   -4.5664 H   0  0  0  0  0  0  0  0  0  0  0  0
   10.9091   -2.3285    1.4179 H   0  0  0  0  0  0  0  0  0  0  0  0
   10.0993    0.6535    5.1619 H   0  0  0  0  0  0  0  0  0  0  0  0
    9.1666    1.1674    3.0012 H   0  0  0  0  0  0  0  0  0  0  0  0
    1.0611    3.5716   -5.4932 H   0  0  0  0  0  0  0  0  0  0  0  0
    2.2181    5.3458   -4.2933 H   0  0  0  0  0  0  0  0  0  0  0  0
    2.9871    4.1911   -3.1991 H   0  0  0  0  0  0  0  0  0  0  0  0
    3.4075    4.1963   -4.9209 H   0  0  0  0  0  0  0  0  0  0  0  0
   -0.1490    4.4877   -3.5878 H   0  0  0  0  0  0  0  0  0  0  0  0
    0.5823    3.3212   -2.4806 H   0  0  0  0  0  0  0  0  0  0  0  0
   -0.5283    2.7648   -3.7451 H   0  0  0  0  0  0  0  0  0  0  0  0
   10.8148   -2.1257    6.1670 H   0  0  0  0  0  0  0  0  0  0  0  0
   13.7634   -2.3650    4.2394 H   0  0  0  0  0  0  0  0  0  0  0  0
   13.8721   -6.5726    3.9986 H   0  0  0  0  0  0  0  0  0  0  0  0
   11.5416   -6.5982    3.3619 H   0  0  0  0  0  0  0  0  0  0  0  0
   10.3160   -4.5309    3.1312 H   0  0  0  0  0  0  0  0  0  0  0  0
   16.0266   -4.5091    3.5869 H   0  0  0  0  0  0  0  0  0  0  0  0
   15.7177   -5.3929    5.0805 H   0  0  0  0  0  0  0  0  0  0  0  0
   15.8298   -3.4531    5.2177 H   0  0  0  0  0  0  0  0  0  0  0  0
  1 36  1  0  0  0  0
  1 37  1  0  0  0  0
  2  1  1  0  0  0  0
  2 11  1  0  0  0  0
  2 38  1  1  0  0  0
  3  2  1  0  0  0  0
  3  4  1  0  0  0  0
  3  9  1  0  0  0  0
  3 39  1  6  0  0  0
  4  5  1  0  0  0  0
  4 10  1  0  0  0  0
  4 40  1  1  0  0  0
  5  6  1  0  0  0  0
  5 41  1  0  0  0  0
  5 42  1  0  0  0  0
  6  1  1  0  0  0  0
  6  7  2  0  0  0  0
  6  8  2  0  0  0  0
  9 43  1  0  0  0  0
 10 12  1  0  0  0  0
 10 44  1  0  0  0  0
 11 19  1  0  0  0  0
 11 45  1  0  0  0  0
 11 46  1  0  0  0  0
 12 13  1  0  0  0  0
 12 47  1  0  0  0  0
 12 48  1  0  0  0  0
 13 14  2  0  0  0  0
 14 15  1  0  0  0  0
 14 49  1  0  0  0  0
 15 16  2  0  0  0  0
 15 25  1  0  0  0  0
 16 17  1  0  0  0  0
 16 50  1  0  0  0  0
 17 18  2  0  0  0  0
 17 51  1  0  0  0  0
 18 13  1  0  0  0  0
 18 52  1  0  0  0  0
 19 20  2  0  0  0  0
 20 21  1  0  0  0  0
 20 53  1  0  0  0  0
 21 22  2  0  0  0  0
 21 33  1  0  0  0  0
 22 23  1  0  0  0  0
 22 28  1  0  0  0  0
 23 24  2  0  0  0  0
 23 54  1  0  0  0  0
 24 19  1  0  0  0  0
 24 55  1  0  0  0  0
 25 26  1  0  0  0  0
 25 27  1  0  0  0  0
 25 56  1  0  0  0  0
 26 57  1  0  0  0  0
 26 58  1  0  0  0  0
 26 59  1  0  0  0  0
 27 60  1  0  0  0  0
 27 61  1  0  0  0  0
 27 62  1  0  0  0  0
 28 63  1  0  0  0  0
 29 34  1  0  0  0  0
 29 64  1  0  0  0  0
 30 31  1  0  0  0  0
 30 34  2  0  0  0  0
 30 65  1  0  0  0  0
 31 32  2  0  0  0  0
 31 66  1  0  0  0  0
 32 33  1  0  0  0  0
 32 67  1  0  0  0  0
 33 29  2  0  0  0  0
 34 35  1  0  0  0  0
 35 68  1  0  0  0  0
 35 69  1  0  0  0  0
 35 70  1  0  0  0  0
M  END
$$$$
Dataset (8)
 OpenBabel02101614293D

 61 63  0  0  0  0  0  0  0  0999 V2000
    7.8496   -2.4690    0.9081 C   0  0  0  0  0  0  0  0  0  0  0  0
    7.8047   -0.9261    0.6683 C   0  0  2  0  0  0  0  0  0  0  0  0
    7.0331   -0.5799   -0.6622 C   0  0  1  0  0  0  0  0  0  0  0  0
    5.5267   -1.0296   -0.7023 C   0  0  2  0  0  0  0  0  0  0  0  0
    5.3648   -2.5735   -0.6046 C   0  0  0  0  0  0  0  0  0  0  0  0
    6.1848   -3.2093    0.8919 S   0  0  0  0  0  0  0  0  0  0  0  0
    6.2879   -4.8080    0.8393 O   0  0  0  0  0  0  0  0  0  0  0  0
    5.3776   -2.7428    2.1960 O   0  0  0  0  0  0  0  0  0  0  0  0
    7.0873    0.8344   -0.8621 O   0  0  0  0  0  0  0  0  0  0  0  0
    4.8852   -0.5241   -1.9493 N   0  0  0  0  0  0  0  0  0  0  0  0
    9.2632   -0.3311    0.7160 C   0  0  0  0  0  0  0  0  0  0  0  0
    3.4136   -0.6634   -2.0607 C   0  0  0  0  0  0  0  0  0  0  0  0
    2.9461   -0.0493   -3.3246 C   0  0  0  0  0  0  0  0  0  0  0  0
    2.5045    1.2905   -3.3372 C   0  0  0  0  0  0  0  0  0  0  0  0
    1.9668    1.8802   -4.5062 C   0  0  0  0  0  0  0  0  0  0  0  0
    1.9056    1.1013   -5.6863 C   0  0  0  0  0  0  0  0  0  0  0  0
    2.3884   -0.2184   -5.7001 C   0  0  0  0  0  0  0  0  0  0  0  0
    2.9094   -0.7907   -4.5274 C   0  0  0  0  0  0  0  0  0  0  0  0
    9.9526   -0.5789    2.0224 C   0  0  0  0  0  0  0  0  0  0  0  0
   10.7679   -1.7228    2.2038 C   0  0  0  0  0  0  0  0  0  0  0  0
   11.2724   -2.0799    3.4777 C   0  0  0  0  0  0  0  0  0  0  0  0
   11.0299   -1.2155    4.5731 C   0  0  0  0  0  0  0  0  0  0  0  0
   10.2853   -0.0352    4.3897 C   0  0  0  0  0  0  0  0  0  0  0  0
    9.7401    0.2745    3.1301 C   0  0  0  0  0  0  0  0  0  0  0  0
    1.4620    3.2877   -4.4881 C   0  0  0  0  0  0  0  0  0  0  0  0
    2.6049    4.2956   -4.1887 C   0  0  0  0  0  0  0  0  0  0  0  0
    0.2807    3.4484   -3.4915 C   0  0  0  0  0  0  0  0  0  0  0  0
   11.9845   -3.3695    3.6561 C   0  0  0  0  0  0  0  0  0  0  0  0
   11.4992   -1.4932    5.8174 O   0  0  0  0  0  0  0  0  0  0  0  0
   11.0493   -4.3485    4.0962 O   0  0  0  0  0  0  0  0  0  0  0  0
    8.4531   -2.9474    0.1320 H   0  0  0  0  0  0  0  0  0  0  0  0
    8.2675   -2.7090    1.8852 H   0  0  0  0  0  0  0  0  0  0  0  0
    7.2434   -0.4693    1.4904 H   0  0  0  0  0  0  0  0  0  0  0  0
    7.5590   -1.0424   -1.5030 H   0  0  0  0  0  0  0  0  0  0  0  0
    5.0204   -0.5688    0.1507 H   0  0  0  0  0  0  0  0  0  0  0  0
    4.3203   -2.8693   -0.5306 H   0  0  0  0  0  0  0  0  0  0  0  0
    5.8076   -3.0554   -1.4770 H   0  0  0  0  0  0  0  0  0  0  0  0
    6.7876    0.9780   -1.7841 H   0  0  0  0  0  0  0  0  0  0  0  0
    5.3069   -1.0093   -2.7421 H   0  0  0  0  0  0  0  0  0  0  0  0
    9.8499   -0.7559   -0.1045 H   0  0  0  0  0  0  0  0  0  0  0  0
    9.2389    0.7481    0.5389 H   0  0  0  0  0  0  0  0  0  0  0  0
    3.1164   -1.7125   -2.0566 H   0  0  0  0  0  0  0  0  0  0  0  0
    2.9316   -0.1885   -1.2000 H   0  0  0  0  0  0  0  0  0  0  0  0
    2.5651    1.8397   -2.4757 H   0  0  0  0  0  0  0  0  0  0  0  0
    1.5087    1.4872   -6.5478 H   0  0  0  0  0  0  0  0  0  0  0  0
    2.3531   -0.7657   -6.5623 H   0  0  0  0  0  0  0  0  0  0  0  0
    3.2493   -1.7556   -4.5514 H   0  0  0  0  0  0  0  0  0  0  0  0
   10.9552   -2.3315    1.4012 H   0  0  0  0  0  0  0  0  0  0  0  0
   10.1278    0.5971    5.1784 H   0  0  0  0  0  0  0  0  0  0  0  0
    9.1766    1.1242    3.0298 H   0  0  0  0  0  0  0  0  0  0  0  0
    1.0698    3.5480   -5.4779 H   0  0  0  0  0  0  0  0  0  0  0  0
    2.2287    5.3174   -4.2675 H   0  0  0  0  0  0  0  0  0  0  0  0
    3.0020    4.1503   -3.1812 H   0  0  0  0  0  0  0  0  0  0  0  0
    3.4193    4.1723   -4.9075 H   0  0  0  0  0  0  0  0  0  0  0  0
   -0.1280    4.4584   -3.5569 H   0  0  0  0  0  0  0  0  0  0  0  0
    0.6081    3.2760   -2.4631 H   0  0  0  0  0  0  0  0  0  0  0  0
   -0.5170    2.7386   -3.7276 H   0  0  0  0  0  0  0  0  0  0  0  0
   12.7854   -3.2781    4.3914 H   0  0  0  0  0  0  0  0  0  0  0  0
   12.4294   -3.7149    2.7206 H   0  0  0  0  0  0  0  0  0  0  0  0
   10.8255   -2.0852    6.2129 H   0  0  0  0  0  0  0  0  0  0  0  0
   11.5483   -5.1921    4.1118 H   0  0  0  0  0  0  0  0  0  0  0  0
  1 31  1  0  0  0  0
  1 32  1  0  0  0  0
  2  1  1  0  0  0  0
  2 11  1  0  0  0  0
  2 33  1  1  0  0  0
  3  2  1  0  0  0  0
  3  4  1  0  0  0  0
  3  9  1  0  0  0  0
  3 34  1  6  0  0  0
  4  5  1  0  0  0  0
  4 10  1  0  0  0  0
  4 35  1  1  0  0  0
  5  6  1  0  0  0  0
  5 36  1  0  0  0  0
  5 37  1  0  0  0  0
  6  1  1  0  0  0  0
  6  7  2  0  0  0  0
  6  8  2  0  0  0  0
  9 38  1  0  0  0  0
 10 12  1  0  0  0  0
 10 39  1  0  0  0  0
 11 19  1  0  0  0  0
 11 40  1  0  0  0  0
 11 41  1  0  0  0  0
 12 13  1  0  0  0  0
 12 42  1  0  0  0  0
 12 43  1  0  0  0  0
 13 14  2  0  0  0  0
 14 15  1  0  0  0  0
 14 44  1  0  0  0  0
 15 16  2  0  0  0  0
 15 25  1  0  0  0  0
 16 17  1  0  0  0  0
 16 45  1  0  0  0  0
 17 18  2  0  0  0  0
 17 46  1  0  0  0  0
 18 13  1  0  0  0  0
 18 47  1  0  0  0  0
 19 20  2  0  0  0  0
 20 21  1  0  0  0  0
 20 48  1  0  0  0  0
 21 22  2  0  0  0  0
 21 28  1  0  0  0  0
 22 23  1  0  0  0  0
 22 29  1  0  0  0  0
 23 24  2  0  0  0  0
 23 49  1  0  0  0  0
 24 19  1  0  0  0  0
 24 50  1  0  0  0  0
 25 26  1  0  0  0  0
 25 27  1  0  0  0  0
 25 51  1  0  0  0  0
 26 52  1  0  0  0  0
 26 53  1  0  0  0  0
 26 54  1  0  0  0  0
 27 55  1  0  0  0  0
 27 56  1  0  0  0  0
 27 57  1  0  0  0  0
 28 30  1  0  0  0  0
 28 58  1  0  0  0  0
 28 59  1  0  0  0  0
 29 60  1  0  0  0  0
 30 61  1  0  0  0  0
M  END
$$$$
Dataset (9)
 OpenBabel02101614293D

 64 66  0  0  0  0  0  0  0  0999 V2000
    7.8618   -2.4718    0.9157 C   0  0  0  0  0  0  0  0  0  0  0  0
    7.8047   -0.9296    0.6747 C   0  0  2  0  0  0  0  0  0  0  0  0
    7.0340   -0.5863   -0.6570 C   0  0  1  0  0  0  0  0  0  0  0  0
    5.5305   -1.0466   -0.7015 C   0  0  2  0  0  0  0  0  0  0  0  0
    5.3758   -2.5931   -0.5957 C   0  0  0  0  0  0  0  0  0  0  0  0
    6.1992   -3.2150    0.9076 S   0  0  0  0  0  0  0  0  0  0  0  0
    6.3117   -4.8131    0.8644 O   0  0  0  0  0  0  0  0  0  0  0  0
    5.3936   -2.7403    2.2100 O   0  0  0  0  0  0  0  0  0  0  0  0
    7.0770    0.8272   -0.8663 O   0  0  0  0  0  0  0  0  0  0  0  0
    4.8935   -0.5472   -1.9567 N   0  0  0  0  0  0  0  0  0  0  0  0
    9.2583   -0.3333    0.7160 C   0  0  0  0  0  0  0  0  0  0  0  0
    3.4181   -0.6739   -2.0654 C   0  0  0  0  0  0  0  0  0  0  0  0
    2.9394   -0.0481   -3.3226 C   0  0  0  0  0  0  0  0  0  0  0  0
    2.4917    1.2923   -3.3349 C   0  0  0  0  0  0  0  0  0  0  0  0
    1.9594    1.8885   -4.5057 C   0  0  0  0  0  0  0  0  0  0  0  0
    1.9088    1.1146   -5.6896 C   0  0  0  0  0  0  0  0  0  0  0  0
    2.3860   -0.2083   -5.7040 C   0  0  0  0  0  0  0  0  0  0  0  0
    2.8991   -0.7870   -4.5282 C   0  0  0  0  0  0  0  0  0  0  0  0
    9.9431   -0.5550    2.0307 C   0  0  0  0  0  0  0  0  0  0  0  0
   10.7655   -1.6912    2.2168 C   0  0  0  0  0  0  0  0  0  0  0  0
   11.2723   -2.0582    3.4862 C   0  0  0  0  0  0  0  0  0  0  0  0
   11.0450   -1.2170    4.6051 C   0  0  0  0  0  0  0  0  0  0  0  0
   10.2801   -0.0233    4.3978 C   0  0  0  0  0  0  0  0  0  0  0  0
    9.7101    0.3174    3.1178 C   0  0  0  0  0  0  0  0  0  0  0  0
    1.4557    3.2998   -4.4941 C   0  0  0  0  0  0  0  0  0  0  0  0
    2.5962    4.3126   -4.1991 C   0  0  0  0  0  0  0  0  0  0  0  0
    0.2707    3.4676   -3.5034 C   0  0  0  0  0  0  0  0  0  0  0  0
   11.9770   -3.3675    3.6335 C   0  0  0  0  0  0  0  0  0  0  0  0
   11.5782   -1.6188    5.8390 O   0  0  0  0  0  0  0  0  0  0  0  0
   11.0034   -4.4876    4.0693 C   0  0  0  0  0  0  0  0  0  0  0  0
   11.7048   -5.7175    4.2157 O   0  0  0  0  0  0  0  0  0  0  0  0
    8.4608   -2.9572    0.1402 H   0  0  0  0  0  0  0  0  0  0  0  0
    8.2852   -2.7068    1.8914 H   0  0  0  0  0  0  0  0  0  0  0  0
    7.2456   -0.4763    1.5005 H   0  0  0  0  0  0  0  0  0  0  0  0
    7.5638   -1.0488   -1.4936 H   0  0  0  0  0  0  0  0  0  0  0  0
    5.0142   -0.5825    0.1463 H   0  0  0  0  0  0  0  0  0  0  0  0
    4.3298   -2.8891   -0.5301 H   0  0  0  0  0  0  0  0  0  0  0  0
    5.8161   -3.0748   -1.4707 H   0  0  0  0  0  0  0  0  0  0  0  0
    6.7561    0.9674   -1.7822 H   0  0  0  0  0  0  0  0  0  0  0  0
    5.3042   -1.0629   -2.7372 H   0  0  0  0  0  0  0  0  0  0  0  0
    9.8429   -0.7767   -0.0943 H   0  0  0  0  0  0  0  0  0  0  0  0
    9.2332    0.7400    0.5111 H   0  0  0  0  0  0  0  0  0  0  0  0
    3.1143   -1.7226   -2.0641 H   0  0  0  0  0  0  0  0  0  0  0  0
    2.9441   -0.2017   -1.2009 H   0  0  0  0  0  0  0  0  0  0  0  0
    2.5480    1.8385   -2.4716 H   0  0  0  0  0  0  0  0  0  0  0  0
    1.5262    1.5112   -6.5531 H   0  0  0  0  0  0  0  0  0  0  0  0
    2.3541   -0.7504   -6.5728 H   0  0  0  0  0  0  0  0  0  0  0  0
    3.2347   -1.7560   -4.5568 H   0  0  0  0  0  0  0  0  0  0  0  0
   10.9605   -2.2946    1.4126 H   0  0  0  0  0  0  0  0  0  0  0  0
   10.1171    0.5991    5.1884 H   0  0  0  0  0  0  0  0  0  0  0  0
    9.1030    1.1789    2.9031 H   0  0  0  0  0  0  0  0  0  0  0  0
    1.0660    3.5607   -5.4855 H   0  0  0  0  0  0  0  0  0  0  0  0
    2.2249    5.3358   -4.2825 H   0  0  0  0  0  0  0  0  0  0  0  0
    2.9941    4.1762   -3.1922 H   0  0  0  0  0  0  0  0  0  0  0  0
    3.4113    4.1884   -4.9155 H   0  0  0  0  0  0  0  0  0  0  0  0
   -0.1425    4.4751   -3.5743 H   0  0  0  0  0  0  0  0  0  0  0  0
    0.5907    3.3036   -2.4726 H   0  0  0  0  0  0  0  0  0  0  0  0
   -0.5235    2.7557   -3.7385 H   0  0  0  0  0  0  0  0  0  0  0  0
   12.4437   -3.6633    2.6897 H   0  0  0  0  0  0  0  0  0  0  0  0
   12.7837   -3.2923    4.3672 H   0  0  0  0  0  0  0  0  0  0  0  0
   10.8199   -2.0023    6.3282 H   0  0  0  0  0  0  0  0  0  0  0  0
   10.2204   -4.6213    3.3192 H   0  0  0  0  0  0  0  0  0  0  0  0
   10.5381   -4.2380    5.0254 H   0  0  0  0  0  0  0  0  0  0  0  0
   11.0202   -6.3636    4.4870 H   0  0  0  0  0  0  0  0  0  0  0  0
  1 32  1  0  0  0  0
  1 33  1  0  0  0  0
  2  1  1  0  0  0  0
  2 11  1  0  0  0  0
  2 34  1  1  0  0  0
  3  2  1  0  0  0  0
  3  4  1  0  0  0  0
  3  9  1  0  0  0  0
  3 35  1  6  0  0  0
  4  5  1  0  0  0  0
  4 10  1  0  0  0  0
  4 36  1  1  0  0  0
  5  6  1  0  0  0  0
  5 37  1  0  0  0  0
  5 38  1  0  0  0  0
  6  1  1  0  0  0  0
  6  7  2  0  0  0  0
  6  8  2  0  0  0  0
  9 39  1  0  0  0  0
 10 12  1  0  0  0  0
 10 40  1  0  0  0  0
 11 19  1  0  0  0  0
 11 41  1  0  0  0  0
 11 42  1  0  0  0  0
 12 13  1  0  0  0  0
 12 43  1  0  0  0  0
 12 44  1  0  0  0  0
 13 14  2  0  0  0  0
 14 15  1  0  0  0  0
 14 45  1  0  0  0  0
 15 16  2  0  0  0  0
 15 25  1  0  0  0  0
 16 17  1  0  0  0  0
 16 46  1  0  0  0  0
 17 18  2  0  0  0  0
 17 47  1  0  0  0  0
 18 13  1  0  0  0  0
 18 48  1  0  0  0  0
 19 20  2  0  0  0  0
 20 21  1  0  0  0  0
 20 49  1  0  0  0  0
 21 22  2  0  0  0  0
 21 28  1  0  0  0  0
 22 23  1  0  0  0  0
 22 29  1  0  0  0  0
 23 24  2  0  0  0  0
 23 50  1  0  0  0  0
 24 19  1  0  0  0  0
 24 51  1  0  0  0  0
 25 26  1  0  0  0  0
 25 27  1  0  0  0  0
 25 52  1  0  0  0  0
 26 53  1  0  0  0  0
 26 54  1  0  0  0  0
 26 55  1  0  0  0  0
 27 56  1  0  0  0  0
 27 57  1  0  0  0  0
 27 58  1  0  0  0  0
 28 30  1  0  0  0  0
 28 59  1  0  0  0  0
 28 60  1  0  0  0  0
 29 61  1  0  0  0  0
 30 31  1  0  0  0  0
 30 62  1  0  0  0  0
 30 63  1  0  0  0  0
 31 64  1  0  0  0  0
M  END
$$$$
Dataset (10)
 OpenBabel02101614293D

 69 71  0  0  0  0  0  0  0  0999 V2000
    7.8572   -2.4575    0.9103 C   0  0  0  0  0  0  0  0  0  0  0  0
    7.7978   -0.9161    0.6694 C   0  0  2  0  0  0  0  0  0  0  0  0
    7.0284   -0.5744   -0.6610 C   0  0  1  0  0  0  0  0  0  0  0  0
    5.5260   -1.0346   -0.7016 C   0  0  2  0  0  0  0  0  0  0  0  0
    5.3709   -2.5807   -0.6017 C   0  0  0  0  0  0  0  0  0  0  0  0
    6.1970   -3.2054    0.8959 S   0  0  0  0  0  0  0  0  0  0  0  0
    6.3082   -4.8035    0.8498 O   0  0  0  0  0  0  0  0  0  0  0  0
    5.3880   -2.7406    2.2000 O   0  0  0  0  0  0  0  0  0  0  0  0
    7.0712    0.8381   -0.8728 O   0  0  0  0  0  0  0  0  0  0  0  0
    4.8888   -0.5306   -1.9523 N   0  0  0  0  0  0  0  0  0  0  0  0
    9.2437   -0.3043    0.7097 C   0  0  0  0  0  0  0  0  0  0  0  0
    3.4161   -0.6685   -2.0630 C   0  0  0  0  0  0  0  0  0  0  0  0
    2.9414   -0.0498   -3.3229 C   0  0  0  0  0  0  0  0  0  0  0  0
    2.4958    1.2889   -3.3377 C   0  0  0  0  0  0  0  0  0  0  0  0
    1.9637    1.8823   -4.5069 C   0  0  0  0  0  0  0  0  0  0  0  0
    1.9096    1.1055   -5.6878 C   0  0  0  0  0  0  0  0  0  0  0  0
    2.3884   -0.2168   -5.6984 C   0  0  0  0  0  0  0  0  0  0  0  0
    2.9036   -0.7936   -4.5240 C   0  0  0  0  0  0  0  0  0  0  0  0
    9.9406   -0.5421    2.0108 C   0  0  0  0  0  0  0  0  0  0  0  0
   10.7695   -1.6752    2.1926 C   0  0  0  0  0  0  0  0  0  0  0  0
   11.2764   -2.0309    3.4662 C   0  0  0  0  0  0  0  0  0  0  0  0
   11.0295   -1.1612    4.5575 C   0  0  0  0  0  0  0  0  0  0  0  0
   10.2706    0.0093    4.3721 C   0  0  0  0  0  0  0  0  0  0  0  0
    9.7181    0.3095    3.1150 C   0  0  0  0  0  0  0  0  0  0  0  0
    1.4600    3.2913   -4.4880 C   0  0  0  0  0  0  0  0  0  0  0  0
    2.6018    4.3025   -4.1924 C   0  0  0  0  0  0  0  0  0  0  0  0
    0.2758    3.4566   -3.4954 C   0  0  0  0  0  0  0  0  0  0  0  0
   11.9959   -3.3265    3.6468 C   0  0  0  0  0  0  0  0  0  0  0  0
   11.4974   -1.4271    5.8035 O   0  0  0  0  0  0  0  0  0  0  0  0
   11.0292   -4.4726    4.0650 C   0  0  0  0  0  0  0  0  0  0  0  0
   11.7408   -5.8412    4.2531 C   0  0  0  0  0  0  0  0  0  0  0  0
   10.7856   -6.9717    4.7036 C   0  0  0  0  0  0  0  0  0  0  0  0
    7.2341   -0.4647    1.4935 H   0  0  0  0  0  0  0  0  0  0  0  0
    5.0124   -0.5708    0.1480 H   0  0  0  0  0  0  0  0  0  0  0  0
    8.4566   -2.9407    0.1356 H   0  0  0  0  0  0  0  0  0  0  0  0
    8.2781   -2.6934    1.8860 H   0  0  0  0  0  0  0  0  0  0  0  0
    7.5570   -1.0355   -1.4987 H   0  0  0  0  0  0  0  0  0  0  0  0
    4.3259   -2.8802   -0.5268 H   0  0  0  0  0  0  0  0  0  0  0  0
    5.8112   -3.0629   -1.4765 H   0  0  0  0  0  0  0  0  0  0  0  0
    6.7658    0.9761   -1.7948 H   0  0  0  0  0  0  0  0  0  0  0  0
    5.3054   -1.0327   -2.7386 H   0  0  0  0  0  0  0  0  0  0  0  0
    9.8290   -0.7267   -0.1119 H   0  0  0  0  0  0  0  0  0  0  0  0
    9.2045    0.7744    0.5306 H   0  0  0  0  0  0  0  0  0  0  0  0
    3.1142   -1.7203   -2.0636 H   0  0  0  0  0  0  0  0  0  0  0  0
    2.9399   -0.1938   -1.1984 H   0  0  0  0  0  0  0  0  0  0  0  0
    2.5560    1.8385   -2.4792 H   0  0  0  0  0  0  0  0  0  0  0  0
    1.5184    1.4980   -6.5492 H   0  0  0  0  0  0  0  0  0  0  0  0
    2.3540   -0.7597   -6.5642 H   0  0  0  0  0  0  0  0  0  0  0  0
    3.2448   -1.7603   -4.5513 H   0  0  0  0  0  0  0  0  0  0  0  0
   10.9675   -2.2758    1.3893 H   0  0  0  0  0  0  0  0  0  0  0  0
   10.1035    0.6402    5.1586 H   0  0  0  0  0  0  0  0  0  0  0  0
    9.1418    1.1488    3.0141 H   0  0  0  0  0  0  0  0  0  0  0  0
    1.0693    3.5533   -5.4779 H   0  0  0  0  0  0  0  0  0  0  0  0
    2.2316    5.3276   -4.2741 H   0  0  0  0  0  0  0  0  0  0  0  0
    3.0006    4.1598   -3.1854 H   0  0  0  0  0  0  0  0  0  0  0  0
    3.4159    4.1797   -4.9107 H   0  0  0  0  0  0  0  0  0  0  0  0
   -0.1384    4.4647   -3.5628 H   0  0  0  0  0  0  0  0  0  0  0  0
    0.5994    3.2867   -2.4661 H   0  0  0  0  0  0  0  0  0  0  0  0
   -0.5201    2.7472   -3.7319 H   0  0  0  0  0  0  0  0  0  0  0  0
   12.4948   -3.6095    2.7153 H   0  0  0  0  0  0  0  0  0  0  0  0
   12.7800   -3.2158    4.4013 H   0  0  0  0  0  0  0  0  0  0  0  0
   10.8501   -2.0574    6.1848 H   0  0  0  0  0  0  0  0  0  0  0  0
   10.2560   -4.5848    3.2984 H   0  0  0  0  0  0  0  0  0  0  0  0
   10.5411   -4.1984    5.0047 H   0  0  0  0  0  0  0  0  0  0  0  0
   12.2050   -6.1390    3.3094 H   0  0  0  0  0  0  0  0  0  0  0  0
   12.5284   -5.7368    5.0034 H   0  0  0  0  0  0  0  0  0  0  0  0
   11.3451   -7.9006    4.8314 H   0  0  0  0  0  0  0  0  0  0  0  0
   10.0085   -7.1366    3.9551 H   0  0  0  0  0  0  0  0  0  0  0  0
   10.3145   -6.7192    5.6551 H   0  0  0  0  0  0  0  0  0  0  0  0
  1 35  1  0  0  0  0
  1 36  1  0  0  0  0
  2  1  1  0  0  0  0
  2 11  1  0  0  0  0
  2 33  1  1  0  0  0
  3  2  1  0  0  0  0
  3  4  1  0  0  0  0
  3  9  1  0  0  0  0
  3 37  1  6  0  0  0
  4  5  1  0  0  0  0
  4 10  1  0  0  0  0
  4 34  1  1  0  0  0
  5  6  1  0  0  0  0
  5 38  1  0  0  0  0
  5 39  1  0  0  0  0
  6  1  1  0  0  0  0
  6  7  2  0  0  0  0
  6  8  2  0  0  0  0
  9 40  1  0  0  0  0
 10 12  1  0  0  0  0
 10 41  1  0  0  0  0
 11 19  1  0  0  0  0
 11 42  1  0  0  0  0
 11 43  1  0  0  0  0
 12 13  1  0  0  0  0
 12 44  1  0  0  0  0
 12 45  1  0  0  0  0
 13 14  2  0  0  0  0
 14 15  1  0  0  0  0
 14 46  1  0  0  0  0
 15 16  2  0  0  0  0
 15 25  1  0  0  0  0
 16 17  1  0  0  0  0
 16 47  1  0  0  0  0
 17 18  2  0  0  0  0
 17 48  1  0  0  0  0
 18 13  1  0  0  0  0
 18 49  1  0  0  0  0
 19 20  2  0  0  0  0
 20 21  1  0  0  0  0
 20 50  1  0  0  0  0
 21 22  2  0  0  0  0
 21 28  1  0  0  0  0
 22 23  1  0  0  0  0
 22 29  1  0  0  0  0
 23 24  2  0  0  0  0
 23 51  1  0  0  0  0
 24 19  1  0  0  0  0
 24 52  1  0  0  0  0
 25 26  1  0  0  0  0
 25 27  1  0  0  0  0
 25 53  1  0  0  0  0
 26 54  1  0  0  0  0
 26 55  1  0  0  0  0
 26 56  1  0  0  0  0
 27 57  1  0  0  0  0
 27 58  1  0  0  0  0
 27 59  1  0  0  0  0
 28 30  1  0  0  0  0
 28 60  1  0  0  0  0
 28 61  1  0  0  0  0
 29 62  1  0  0  0  0
 30 31  1  0  0  0  0
 30 63  1  0  0  0  0
 30 64  1  0  0  0  0
 31 32  1  0  0  0  0
 31 65  1  0  0  0  0
 31 66  1  0  0  0  0
 32 67  1  0  0  0  0
 32 68  1  0  0  0  0
 32 69  1  0  0  0  0
M  END
$$$$
Dataset (11)
 OpenBabel02101614293D

 66 68  0  0  0  0  0  0  0  0999 V2000
    7.8598   -2.4632    0.9236 C   0  0  0  0  0  0  0  0  0  0  0  0
    7.7926   -0.9227    0.6801 C   0  0  2  0  0  0  0  0  0  0  0  0
    7.0232   -0.5810   -0.6520 C   0  0  1  0  0  0  0  0  0  0  0  0
    5.5231   -1.0481   -0.6998 C   0  0  2  0  0  0  0  0  0  0  0  0
    5.3745   -2.5940   -0.5971 C   0  0  0  0  0  0  0  0  0  0  0  0
    6.1972   -3.2100    0.9103 S   0  0  0  0  0  0  0  0  0  0  0  0
    6.3129   -4.8079    0.8732 O   0  0  0  0  0  0  0  0  0  0  0  0
    5.3898   -2.7438    2.2150 O   0  0  0  0  0  0  0  0  0  0  0  0
    7.0601    0.8330   -0.8626 O   0  0  0  0  0  0  0  0  0  0  0  0
    4.8952   -0.5532   -1.9593 N   0  0  0  0  0  0  0  0  0  0  0  0
    9.2391   -0.3114    0.7184 C   0  0  0  0  0  0  0  0  0  0  0  0
    3.4201   -0.6715   -2.0687 C   0  0  0  0  0  0  0  0  0  0  0  0
    2.9366   -0.0468   -3.3237 C   0  0  0  0  0  0  0  0  0  0  0  0
    2.4864    1.2920   -3.3347 C   0  0  0  0  0  0  0  0  0  0  0  0
    1.9577    1.8919   -4.5046 C   0  0  0  0  0  0  0  0  0  0  0  0
    1.9121    1.1178   -5.6875 C   0  0  0  0  0  0  0  0  0  0  0  0
    2.3845   -0.2058   -5.7033 C   0  0  0  0  0  0  0  0  0  0  0  0
    2.8942   -0.7845   -4.5284 C   0  0  0  0  0  0  0  0  0  0  0  0
    9.9523   -0.5701    2.0106 C   0  0  0  0  0  0  0  0  0  0  0  0
   10.7811   -1.7213    2.1528 C   0  0  0  0  0  0  0  0  0  0  0  0
   11.2924   -2.0922    3.4572 C   0  0  0  0  0  0  0  0  0  0  0  0
   10.9997   -1.1547    4.5569 C   0  0  0  0  0  0  0  0  0  0  0  0
   10.2373    0.0599    4.3876 C   0  0  0  0  0  0  0  0  0  0  0  0
    9.7196    0.3044    3.1050 C   0  0  0  0  0  0  0  0  0  0  0  0
    1.4548    3.3041   -4.4934 C   0  0  0  0  0  0  0  0  0  0  0  0
    2.5939    4.3181   -4.2016 C   0  0  0  0  0  0  0  0  0  0  0  0
    0.2671    3.4749   -3.5074 C   0  0  0  0  0  0  0  0  0  0  0  0
   12.0202   -3.3663    3.6697 C   0  0  0  0  0  0  0  0  0  0  0  0
   11.4151   -1.3361    5.8756 O   0  0  0  0  0  0  0  0  0  0  0  0
   11.0536   -4.5086    4.0804 C   0  0  0  0  0  0  0  0  0  0  0  0
   11.7531   -5.8747    4.2642 C   0  0  0  0  0  0  0  0  0  0  0  0
    8.4632   -2.9448    0.1498 H   0  0  0  0  0  0  0  0  0  0  0  0
    8.2906   -2.6932    1.8986 H   0  0  0  0  0  0  0  0  0  0  0  0
    7.2295   -0.4770    1.5076 H   0  0  0  0  0  0  0  0  0  0  0  0
    7.5598   -1.0386   -1.4873 H   0  0  0  0  0  0  0  0  0  0  0  0
    5.0036   -0.5871    0.1469 H   0  0  0  0  0  0  0  0  0  0  0  0
    4.3287   -2.8939   -0.5296 H   0  0  0  0  0  0  0  0  0  0  0  0
    5.8211   -3.0713   -1.4738 H   0  0  0  0  0  0  0  0  0  0  0  0
    6.7412    0.9704   -1.7801 H   0  0  0  0  0  0  0  0  0  0  0  0
    5.3062   -1.0758   -2.7349 H   0  0  0  0  0  0  0  0  0  0  0  0
    9.8188   -0.7139   -0.1152 H   0  0  0  0  0  0  0  0  0  0  0  0
    9.1840    0.7684    0.5568 H   0  0  0  0  0  0  0  0  0  0  0  0
    3.1141   -1.7184   -2.0747 H   0  0  0  0  0  0  0  0  0  0  0  0
    2.9480   -0.2010   -1.2015 H   0  0  0  0  0  0  0  0  0  0  0  0
    2.5408    1.8363   -2.4716 H   0  0  0  0  0  0  0  0  0  0  0  0
    1.5372    1.5145   -6.5518 H   0  0  0  0  0  0  0  0  0  0  0  0
    2.3551   -0.7472   -6.5706 H   0  0  0  0  0  0  0  0  0  0  0  0
    3.2285   -1.7513   -4.5557 H   0  0  0  0  0  0  0  0  0  0  0  0
   10.9336   -2.2758    1.2434 H   0  0  0  0  0  0  0  0  0  0  0  0
   10.0641    0.7043    5.1622 H   0  0  0  0  0  0  0  0  0  0  0  0
    9.1463    1.1431    2.9716 H   0  0  0  0  0  0  0  0  0  0  0  0
    1.0661    3.5634   -5.4846 H   0  0  0  0  0  0  0  0  0  0  0  0
    2.2230    5.3414   -4.2879 H   0  0  0  0  0  0  0  0  0  0  0  0
    2.9926    4.1828   -3.1951 H   0  0  0  0  0  0  0  0  0  0  0  0
    3.4068    4.1905   -4.9191 H   0  0  0  0  0  0  0  0  0  0  0  0
   -0.1475    4.4819   -3.5820 H   0  0  0  0  0  0  0  0  0  0  0  0
    0.5847    3.3126   -2.4758 H   0  0  0  0  0  0  0  0  0  0  0  0
   -0.5245    2.7611   -3.7445 H   0  0  0  0  0  0  0  0  0  0  0  0
   12.5387   -3.6475    2.7514 H   0  0  0  0  0  0  0  0  0  0  0  0
   12.7785   -3.2369    4.4451 H   0  0  0  0  0  0  0  0  0  0  0  0
   10.9707   -2.1609    6.1675 H   0  0  0  0  0  0  0  0  0  0  0  0
   10.2810   -4.6225    3.3154 H   0  0  0  0  0  0  0  0  0  0  0  0
   10.5658   -4.2425    5.0218 H   0  0  0  0  0  0  0  0  0  0  0  0
   12.5245   -5.8063    5.0327 H   0  0  0  0  0  0  0  0  0  0  0  0
   11.0224   -6.6265    4.5713 H   0  0  0  0  0  0  0  0  0  0  0  0
   12.2100   -6.2001    3.3279 H   0  0  0  0  0  0  0  0  0  0  0  0
  1 32  1  0  0  0  0
  1 33  1  0  0  0  0
  2  1  1  0  0  0  0
  2 11  1  0  0  0  0
  2 34  1  1  0  0  0
  3  2  1  0  0  0  0
  3  4  1  0  0  0  0
  3  9  1  0  0  0  0
  3 35  1  6  0  0  0
  4  5  1  0  0  0  0
  4 10  1  0  0  0  0
  4 36  1  1  0  0  0
  5  6  1  0  0  0  0
  5 37  1  0  0  0  0
  5 38  1  0  0  0  0
  6  1  1  0  0  0  0
  6  7  2  0  0  0  0
  6  8  2  0  0  0  0
  9 39  1  0  0  0  0
 10 12  1  0  0  0  0
 10 40  1  0  0  0  0
 11 19  1  0  0  0  0
 11 41  1  0  0  0  0
 11 42  1  0  0  0  0
 12 13  1  0  0  0  0
 12 43  1  0  0  0  0
 12 44  1  0  0  0  0
 13 14  2  0  0  0  0
 14 15  1  0  0  0  0
 14 45  1  0  0  0  0
 15 16  2  0  0  0  0
 15 25  1  0  0  0  0
 16 17  1  0  0  0  0
 16 46  1  0  0  0  0
 17 18  2  0  0  0  0
 17 47  1  0  0  0  0
 18 13  1  0  0  0  0
 18 48  1  0  0  0  0
 19 20  2  0  0  0  0
 20 21  1  0  0  0  0
 20 49  1  0  0  0  0
 21 22  2  0  0  0  0
 21 28  1  0  0  0  0
 22 23  1  0  0  0  0
 22 29  1  0  0  0  0
 23 24  2  0  0  0  0
 23 50  1  0  0  0  0
 24 19  1  0  0  0  0
 24 51  1  0  0  0  0
 25 26  1  0  0  0  0
 25 27  1  0  0  0  0
 25 52  1  0  0  0  0
 26 53  1  0  0  0  0
 26 54  1  0  0  0  0
 26 55  1  0  0  0  0
 27 56  1  0  0  0  0
 27 57  1  0  0  0  0
 27 58  1  0  0  0  0
 28 30  1  0  0  0  0
 28 59  1  0  0  0  0
 28 60  1  0  0  0  0
 29 61  1  0  0  0  0
 30 31  1  0  0  0  0
 30 62  1  0  0  0  0
 30 63  1  0  0  0  0
 31 64  1  0  0  0  0
 31 65  1  0  0  0  0
 31 66  1  0  0  0  0
M  END
$$$$
Dataset (12)
 OpenBabel02101614293D

 63 65  0  0  0  0  0  0  0  0999 V2000
    7.8599   -2.4785    0.9225 C   0  0  0  0  0  0  0  0  0  0  0  0
    7.7984   -0.9361    0.6786 C   0  0  2  0  0  0  0  0  0  0  0  0
    7.0306   -0.5872   -0.6538 C   0  0  1  0  0  0  0  0  0  0  0  0
    5.5298   -1.0540   -0.7011 C   0  0  2  0  0  0  0  0  0  0  0  0
    5.3762   -2.5999   -0.5968 C   0  0  0  0  0  0  0  0  0  0  0  0
    6.1957   -3.2206    0.9108 S   0  0  0  0  0  0  0  0  0  0  0  0
    6.3123   -4.8189    0.8746 O   0  0  0  0  0  0  0  0  0  0  0  0
    5.3920   -2.7454    2.2149 O   0  0  0  0  0  0  0  0  0  0  0  0
    7.0694    0.8286   -0.8617 O   0  0  0  0  0  0  0  0  0  0  0  0
    4.9006   -0.5621   -1.9615 N   0  0  0  0  0  0  0  0  0  0  0  0
    9.2484   -0.3314    0.7179 C   0  0  0  0  0  0  0  0  0  0  0  0
    3.4248   -0.6764   -2.0695 C   0  0  0  0  0  0  0  0  0  0  0  0
    2.9366   -0.0500   -3.3244 C   0  0  0  0  0  0  0  0  0  0  0  0
    2.4857    1.2902   -3.3354 C   0  0  0  0  0  0  0  0  0  0  0  0
    1.9586    1.8948   -4.5041 C   0  0  0  0  0  0  0  0  0  0  0  0
    1.9146    1.1208   -5.6884 C   0  0  0  0  0  0  0  0  0  0  0  0
    2.3856   -0.2034   -5.7050 C   0  0  0  0  0  0  0  0  0  0  0  0
    2.8942   -0.7836   -4.5310 C   0  0  0  0  0  0  0  0  0  0  0  0
    9.9502   -0.5734    2.0171 C   0  0  0  0  0  0  0  0  0  0  0  0
   10.7660   -1.7167    2.2003 C   0  0  0  0  0  0  0  0  0  0  0  0
   11.2743   -2.0702    3.4735 C   0  0  0  0  0  0  0  0  0  0  0  0
   11.0349   -1.1943    4.5606 C   0  0  0  0  0  0  0  0  0  0  0  0
   10.2924   -0.0143    4.3761 C   0  0  0  0  0  0  0  0  0  0  0  0
    9.7423    0.2864    3.1184 C   0  0  0  0  0  0  0  0  0  0  0  0
    1.4546    3.3089   -4.4917 C   0  0  0  0  0  0  0  0  0  0  0  0
    2.5945    4.3247   -4.2033 C   0  0  0  0  0  0  0  0  0  0  0  0
    0.2618    3.4805   -3.5087 C   0  0  0  0  0  0  0  0  0  0  0  0
   11.9817   -3.3684    3.6618 C   0  0  0  0  0  0  0  0  0  0  0  0
   11.4948   -1.4684    5.8063 O   0  0  0  0  0  0  0  0  0  0  0  0
   10.9977   -4.4864    4.0748 C   0  0  0  0  0  0  0  0  0  0  0  0
    8.4593   -2.9656    0.1491 H   0  0  0  0  0  0  0  0  0  0  0  0
    8.2872   -2.7144    1.8972 H   0  0  0  0  0  0  0  0  0  0  0  0
    7.2411   -0.4888    1.5095 H   0  0  0  0  0  0  0  0  0  0  0  0
    7.5694   -1.0455   -1.4885 H   0  0  0  0  0  0  0  0  0  0  0  0
    5.0141   -0.5893    0.1466 H   0  0  0  0  0  0  0  0  0  0  0  0
    4.3292   -2.8939   -0.5291 H   0  0  0  0  0  0  0  0  0  0  0  0
    5.8235   -3.0807   -1.4710 H   0  0  0  0  0  0  0  0  0  0  0  0
    6.7368    0.9636   -1.7739 H   0  0  0  0  0  0  0  0  0  0  0  0
    5.3105   -1.0897   -2.7345 H   0  0  0  0  0  0  0  0  0  0  0  0
    9.2044    0.7473    0.5435 H   0  0  0  0  0  0  0  0  0  0  0  0
    9.8318   -0.7535   -0.1056 H   0  0  0  0  0  0  0  0  0  0  0  0
    3.1220   -1.7216   -2.0657 H   0  0  0  0  0  0  0  0  0  0  0  0
    2.9553   -0.2041   -1.2023 H   0  0  0  0  0  0  0  0  0  0  0  0
    2.5357    1.8347   -2.4721 H   0  0  0  0  0  0  0  0  0  0  0  0
    1.5446    1.5149   -6.5548 H   0  0  0  0  0  0  0  0  0  0  0  0
    2.3566   -0.7483   -6.5708 H   0  0  0  0  0  0  0  0  0  0  0  0
    3.2258   -1.7507   -4.5571 H   0  0  0  0  0  0  0  0  0  0  0  0
   10.9483   -2.3298    1.4008 H   0  0  0  0  0  0  0  0  0  0  0  0
   10.1304    0.6173    5.1644 H   0  0  0  0  0  0  0  0  0  0  0  0
    9.1747    1.1306    3.0156 H   0  0  0  0  0  0  0  0  0  0  0  0
    1.0647    3.5686   -5.4829 H   0  0  0  0  0  0  0  0  0  0  0  0
    2.2249    5.3481   -4.2911 H   0  0  0  0  0  0  0  0  0  0  0  0
    2.9951    4.1926   -3.1975 H   0  0  0  0  0  0  0  0  0  0  0  0
    3.4062    4.1953   -4.9213 H   0  0  0  0  0  0  0  0  0  0  0  0
   -0.1554    4.4870   -3.5846 H   0  0  0  0  0  0  0  0  0  0  0  0
    0.5744    3.3204   -2.4751 H   0  0  0  0  0  0  0  0  0  0  0  0
   -0.5296    2.7655   -3.7460 H   0  0  0  0  0  0  0  0  0  0  0  0
   12.7551   -3.2773    4.4281 H   0  0  0  0  0  0  0  0  0  0  0  0
   12.4844   -3.6667    2.7382 H   0  0  0  0  0  0  0  0  0  0  0  0
   10.8349   -2.0836    6.1915 H   0  0  0  0  0  0  0  0  0  0  0  0
   11.5286   -5.4326    4.1905 H   0  0  0  0  0  0  0  0  0  0  0  0
   10.2250   -4.6155    3.3145 H   0  0  0  0  0  0  0  0  0  0  0  0
   10.5217   -4.2408    5.0257 H   0  0  0  0  0  0  0  0  0  0  0  0
  1 31  1  0  0  0  0
  1 32  1  0  0  0  0
  2  1  1  0  0  0  0
  2 11  1  0  0  0  0
  2 33  1  1  0  0  0
  3  2  1  0  0  0  0
  3  4  1  0  0  0  0
  3  9  1  0  0  0  0
  3 34  1  6  0  0  0
  4  5  1  0  0  0  0
  4 10  1  0  0  0  0
  4 35  1  1  0  0  0
  5  6  1  0  0  0  0
  5 36  1  0  0  0  0
  5 37  1  0  0  0  0
  6  1  1  0  0  0  0
  6  7  2  0  0  0  0
  6  8  2  0  0  0  0
  9 38  1  0  0  0  0
 10 12  1  0  0  0  0
 10 39  1  0  0  0  0
 11 19  1  0  0  0  0
 11 40  1  0  0  0  0
 11 41  1  0  0  0  0
 12 13  1  0  0  0  0
 12 42  1  0  0  0  0
 12 43  1  0  0  0  0
 13 14  2  0  0  0  0
 14 15  1  0  0  0  0
 14 44  1  0  0  0  0
 15 16  2  0  0  0  0
 15 25  1  0  0  0  0
 16 17  1  0  0  0  0
 16 45  1  0  0  0  0
 17 18  2  0  0  0  0
 17 46  1  0  0  0  0
 18 13  1  0  0  0  0
 18 47  1  0  0  0  0
 19 20  2  0  0  0  0
 20 21  1  0  0  0  0
 20 48  1  0  0  0  0
 21 22  2  0  0  0  0
 21 28  1  0  0  0  0
 22 23  1  0  0  0  0
 22 29  1  0  0  0  0
 23 24  2  0  0  0  0
 23 49  1  0  0  0  0
 24 19  1  0  0  0  0
 24 50  1  0  0  0  0
 25 26  1  0  0  0  0
 25 27  1  0  0  0  0
 25 51  1  0  0  0  0
 26 52  1  0  0  0  0
 26 53  1  0  0  0  0
 26 54  1  0  0  0  0
 27 55  1  0  0  0  0
 27 56  1  0  0  0  0
 27 57  1  0  0  0  0
 28 30  1  0  0  0  0
 28 58  1  0  0  0  0
 28 59  1  0  0  0  0
 29 60  1  0  0  0  0
 30 61  1  0  0  0  0
 30 62  1  0  0  0  0
 30 63  1  0  0  0  0
M  END
$$$$
Dataset (13)
 OpenBabel02101614293D

 57 59  0  0  0  0  0  0  0  0999 V2000
    7.2661   -2.1846    1.4029 C   0  0  0  0  0  0  0  0  0  0  0  0
    7.2646   -0.6790    0.9905 C   0  0  2  0  0  0  0  0  0  0  0  0
    6.9072   -0.4911   -0.5348 C   0  0  1  0  0  0  0  0  0  0  0  0
    5.4865   -1.0140   -0.9623 C   0  0  2  0  0  0  0  0  0  0  0  0
    5.3200   -2.5450   -0.7375 C   0  0  0  0  0  0  0  0  0  0  0  0
    5.6751   -2.9775    0.9992 S   0  0  0  0  0  0  0  0  0  0  0  0
    5.8004   -4.5665    1.1732 O   0  0  0  0  0  0  0  0  0  0  0  0
    4.5320   -2.3961    1.9622 O   0  0  0  0  0  0  0  0  0  0  0  0
    6.9923    0.8972   -0.8732 O   0  0  0  0  0  0  0  0  0  0  0  0
    5.2417   -0.6807   -2.3966 N   0  0  0  0  0  0  0  0  0  0  0  0
    8.6414   -0.0316    1.3755 C   0  0  0  0  0  0  0  0  0  0  0  0
    3.8570   -0.8545   -2.9055 C   0  0  0  0  0  0  0  0  0  0  0  0
    3.7314   -0.3796   -4.3077 C   0  0  0  0  0  0  0  0  0  0  0  0
    3.2788    0.9301   -4.5917 C   0  0  0  0  0  0  0  0  0  0  0  0
    3.1011    1.3888   -5.9224 C   0  0  0  0  0  0  0  0  0  0  0  0
    3.4090    0.4976   -6.9780 C   0  0  0  0  0  0  0  0  0  0  0  0
    3.8753   -0.8018   -6.7168 C   0  0  0  0  0  0  0  0  0  0  0  0
    4.0346   -1.2364   -5.3904 C   0  0  0  0  0  0  0  0  0  0  0  0
    8.9425   -0.0986    2.8370 C   0  0  0  0  0  0  0  0  0  0  0  0
    9.7066   -1.1630    3.3734 C   0  0  0  0  0  0  0  0  0  0  0  0
    9.8586   -1.3167    4.7648 C   0  0  0  0  0  0  0  0  0  0  0  0
    9.2843   -0.3718    5.6383 C   0  0  0  0  0  0  0  0  0  0  0  0
    8.5863    0.7324    5.1158 C   0  0  0  0  0  0  0  0  0  0  0  0
    8.4119    0.8644    3.7259 C   0  0  0  0  0  0  0  0  0  0  0  0
    2.6004    2.7744   -6.2146 C   0  0  0  0  0  0  0  0  0  0  0  0
    3.5995    3.8627   -5.7329 C   0  0  0  0  0  0  0  0  0  0  0  0
    1.1761    3.0004   -5.6341 C   0  0  0  0  0  0  0  0  0  0  0  0
   10.7896   -2.7888    5.4257 Br  0  0  0  0  0  0  0  0  0  0  0  0
    9.3890   -0.5121    6.9813 O   0  0  0  0  0  0  0  0  0  0  0  0
    8.0636   -2.7231    0.8849 H   0  0  0  0  0  0  0  0  0  0  0  0
    7.4045   -2.3032    2.4783 H   0  0  0  0  0  0  0  0  0  0  0  0
    6.4908   -0.1701    1.5767 H   0  0  0  0  0  0  0  0  0  0  0  0
    7.6643   -1.0077   -1.1299 H   0  0  0  0  0  0  0  0  0  0  0  0
    4.7436   -0.4861   -0.3550 H   0  0  0  0  0  0  0  0  0  0  0  0
    4.3004   -2.8707   -0.9372 H   0  0  0  0  0  0  0  0  0  0  0  0
    6.0009   -3.0958   -1.3906 H   0  0  0  0  0  0  0  0  0  0  0  0
    6.9143    0.9324   -1.8499 H   0  0  0  0  0  0  0  0  0  0  0  0
    5.8536   -1.2772   -2.9586 H   0  0  0  0  0  0  0  0  0  0  0  0
    9.4350   -0.5248    0.8072 H   0  0  0  0  0  0  0  0  0  0  0  0
    8.6527    1.0184    1.0736 H   0  0  0  0  0  0  0  0  0  0  0  0
    3.5725   -1.9068   -2.8780 H   0  0  0  0  0  0  0  0  0  0  0  0
    3.1581   -0.3189   -2.2577 H   0  0  0  0  0  0  0  0  0  0  0  0
    3.0740    1.5617   -3.8136 H   0  0  0  0  0  0  0  0  0  0  0  0
    3.3002    0.7895   -7.9512 H   0  0  0  0  0  0  0  0  0  0  0  0
    4.1002   -1.4302   -7.4906 H   0  0  0  0  0  0  0  0  0  0  0  0
    4.3685   -2.1856   -5.2160 H   0  0  0  0  0  0  0  0  0  0  0  0
   10.1258   -1.8555    2.7484 H   0  0  0  0  0  0  0  0  0  0  0  0
    8.1904    1.4339    5.7478 H   0  0  0  0  0  0  0  0  0  0  0  0
    7.8832    1.6622    3.3664 H   0  0  0  0  0  0  0  0  0  0  0  0
    2.5069    2.9136   -7.2985 H   0  0  0  0  0  0  0  0  0  0  0  0
    3.2595    4.8554   -6.0361 H   0  0  0  0  0  0  0  0  0  0  0  0
    3.6979    3.8538   -4.6464 H   0  0  0  0  0  0  0  0  0  0  0  0
    4.5842    3.6932   -6.1739 H   0  0  0  0  0  0  0  0  0  0  0  0
    0.7885    3.9752   -5.9386 H   0  0  0  0  0  0  0  0  0  0  0  0
    1.1839    2.9639   -4.5431 H   0  0  0  0  0  0  0  0  0  0  0  0
    0.4932    2.2312   -6.0028 H   0  0  0  0  0  0  0  0  0  0  0  0
    8.6190   -1.0650    7.2383 H   0  0  0  0  0  0  0  0  0  0  0  0
  1  2  1  0  0  0  0
  1 30  1  0  0  0  0
  1 31  1  0  0  0  0
  2  3  1  0  0  0  0
  2 11  1  0  0  0  0
  2 32  1  1  0  0  0
  3  4  1  0  0  0  0
  3  9  1  0  0  0  0
  3 33  1  6  0  0  0
  4  5  1  0  0  0  0
  4 10  1  0  0  0  0
  4 34  1  1  0  0  0
  5  6  1  0  0  0  0
  5 35  1  0  0  0  0
  5 36  1  0  0  0  0
  6  1  1  0  0  0  0
  6  7  2  0  0  0  0
  6  8  2  0  0  0  0
  9 37  1  0  0  0  0
 10 12  1  0  0  0  0
 10 38  1  0  0  0  0
 11 19  1  0  0  0  0
 11 39  1  0  0  0  0
 11 40  1  0  0  0  0
 12 13  1  0  0  0  0
 12 41  1  0  0  0  0
 12 42  1  0  0  0  0
 13 14  2  0  0  0  0
 14 15  1  0  0  0  0
 14 43  1  0  0  0  0
 15 16  2  0  0  0  0
 15 25  1  0  0  0  0
 16 17  1  0  0  0  0
 16 44  1  0  0  0  0
 17 18  2  0  0  0  0
 17 45  1  0  0  0  0
 18 13  1  0  0  0  0
 18 46  1  0  0  0  0
 19 20  2  0  0  0  0
 20 21  1  0  0  0  0
 20 47  1  0  0  0  0
 21 22  2  0  0  0  0
 21 28  1  0  0  0  0
 22 23  1  0  0  0  0
 22 29  1  0  0  0  0
 23 24  2  0  0  0  0
 23 48  1  0  0  0  0
 24 19  1  0  0  0  0
 24 49  1  0  0  0  0
 25 26  1  0  0  0  0
 25 27  1  0  0  0  0
 25 50  1  0  0  0  0
 26 51  1  0  0  0  0
 26 52  1  0  0  0  0
 26 53  1  0  0  0  0
 27 54  1  0  0  0  0
 27 55  1  0  0  0  0
 27 56  1  0  0  0  0
 29 57  1  0  0  0  0
M  END
$$$$
Dataset (14)
 OpenBabel02101614293D

 64 66  0  0  0  0  0  0  0  0999 V2000
   10.7282    1.8804    6.9952 C   0  0  0  0  0  0  0  0  0  0  0  0
    9.4391    2.6213    6.5263 C   0  0  2  0  0  0  0  0  0  0  0  0
    8.9930    3.7491    7.5281 C   0  0  1  0  0  0  0  0  0  0  0  0
   10.0543    4.8848    7.7357 C   0  0  2  0  0  0  0  0  0  0  0  0
   11.3802    4.3732    8.3615 C   0  0  0  0  0  0  0  0  0  0  0  0
   12.0864    3.0665    7.2956 S   0  0  0  0  0  0  0  0  0  0  0  0
   13.3115    2.3384    8.0303 O   0  0  0  0  0  0  0  0  0  0  0  0
   12.5712    3.7060    5.9071 O   0  0  0  0  0  0  0  0  0  0  0  0
    7.7976    4.3602    7.0294 O   0  0  0  0  0  0  0  0  0  0  0  0
    9.4795    5.9537    8.5991 N   0  0  0  0  0  0  0  0  0  0  0  0
    8.3004    1.5767    6.2690 C   0  0  0  0  0  0  0  0  0  0  0  0
   10.0537    7.3145    8.4534 C   0  0  0  0  0  0  0  0  0  0  0  0
    9.2819    8.2864    9.2698 C   0  0  0  0  0  0  0  0  0  0  0  0
    8.5080    9.3066    8.6645 C   0  0  0  0  0  0  0  0  0  0  0  0
    7.7848   10.2497    9.4380 C   0  0  0  0  0  0  0  0  0  0  0  0
    7.8576   10.1464   10.8486 C   0  0  0  0  0  0  0  0  0  0  0  0
    8.6091    9.1308   11.4649 C   0  0  0  0  0  0  0  0  0  0  0  0
    9.3180    8.2079   10.6799 C   0  0  0  0  0  0  0  0  0  0  0  0
    8.5742    0.6615    5.1257 C   0  0  0  0  0  0  0  0  0  0  0  0
    8.8402   -0.7143    5.3304 C   0  0  0  0  0  0  0  0  0  0  0  0
    9.0645   -1.5770    4.2389 C   0  0  0  0  0  0  0  0  0  0  0  0
    9.0300   -1.0608    2.9235 C   0  0  0  0  0  0  0  0  0  0  0  0
    8.8208    0.3140    2.7150 C   0  0  0  0  0  0  0  0  0  0  0  0
    8.5736    1.1650    3.8037 C   0  0  0  0  0  0  0  0  0  0  0  0
    6.9589   11.3199    8.7845 C   0  0  0  0  0  0  0  0  0  0  0  0
    7.8186   12.2637    7.8971 C   0  0  0  0  0  0  0  0  0  0  0  0
    5.7602   10.7172    7.9993 C   0  0  0  0  0  0  0  0  0  0  0  0
    9.4220   -3.3775    4.5695 Br  0  0  0  0  0  0  0  0  0  0  0  0
    9.1753   -1.8167    1.8005 O   0  0  0  0  0  0  0  0  0  0  0  0
    8.3721   -2.8357    1.3880 C   0  0  0  0  0  0  0  0  0  0  0  0
    7.3743   -3.2053    2.0549 O   0  0  0  0  0  0  0  0  0  0  0  0
    8.6832   -3.3709    0.1863 N   0  0  0  0  0  0  0  0  0  0  0  0
    7.9529   -4.3831   -0.4943 C   0  0  0  0  0  0  0  0  0  0  0  0
   10.5364    1.3438    7.9258 H   0  0  0  0  0  0  0  0  0  0  0  0
   11.0641    1.1639    6.2437 H   0  0  0  0  0  0  0  0  0  0  0  0
    9.6671    3.1175    5.5769 H   0  0  0  0  0  0  0  0  0  0  0  0
    8.7500    3.2960    8.4938 H   0  0  0  0  0  0  0  0  0  0  0  0
   10.2699    5.3063    6.7472 H   0  0  0  0  0  0  0  0  0  0  0  0
   12.1115    5.1763    8.4513 H   0  0  0  0  0  0  0  0  0  0  0  0
   11.1938    3.9595    9.3538 H   0  0  0  0  0  0  0  0  0  0  0  0
    7.5307    5.0097    7.7137 H   0  0  0  0  0  0  0  0  0  0  0  0
    9.6090    5.6680    9.5728 H   0  0  0  0  0  0  0  0  0  0  0  0
    7.3588    2.0840    6.0445 H   0  0  0  0  0  0  0  0  0  0  0  0
    8.1321    1.0037    7.1874 H   0  0  0  0  0  0  0  0  0  0  0  0
   11.0949    7.3250    8.7852 H   0  0  0  0  0  0  0  0  0  0  0  0
   10.0426    7.6028    7.3987 H   0  0  0  0  0  0  0  0  0  0  0  0
    8.4694    9.3600    7.6436 H   0  0  0  0  0  0  0  0  0  0  0  0
    7.3537   10.8086   11.4425 H   0  0  0  0  0  0  0  0  0  0  0  0
    8.6411    9.0636   12.4861 H   0  0  0  0  0  0  0  0  0  0  0  0
    9.8682    7.4792   11.1431 H   0  0  0  0  0  0  0  0  0  0  0  0
    8.8753   -1.0986    6.2791 H   0  0  0  0  0  0  0  0  0  0  0  0
    8.8312    0.6982    1.7657 H   0  0  0  0  0  0  0  0  0  0  0  0
    8.3879    2.1559    3.6216 H   0  0  0  0  0  0  0  0  0  0  0  0
    6.5178   11.9599    9.5574 H   0  0  0  0  0  0  0  0  0  0  0  0
    7.2105   13.0930    7.5283 H   0  0  0  0  0  0  0  0  0  0  0  0
    8.2304   11.7366    7.0341 H   0  0  0  0  0  0  0  0  0  0  0  0
    8.6462   12.6777    8.4785 H   0  0  0  0  0  0  0  0  0  0  0  0
    5.1212   11.5147    7.6140 H   0  0  0  0  0  0  0  0  0  0  0  0
    6.0989   10.1148    7.1541 H   0  0  0  0  0  0  0  0  0  0  0  0
    5.1571   10.0861    8.6570 H   0  0  0  0  0  0  0  0  0  0  0  0
    9.4643   -3.0116   -0.2631 H   0  0  0  0  0  0  0  0  0  0  0  0
    7.3088   -3.9121   -1.2392 H   0  0  0  0  0  0  0  0  0  0  0  0
    8.6633   -5.0403   -1.0001 H   0  0  0  0  0  0  0  0  0  0  0  0
    7.3368   -4.9807    0.1809 H   0  0  0  0  0  0  0  0  0  0  0  0
  1  2  1  0  0  0  0
  1 34  1  0  0  0  0
  1 35  1  0  0  0  0
  2  3  1  0  0  0  0
  2 11  1  0  0  0  0
  2 36  1  6  0  0  0
  3  4  1  0  0  0  0
  3  9  1  0  0  0  0
  3 37  1  1  0  0  0
  4  5  1  0  0  0  0
  4 10  1  0  0  0  0
  4 38  1  6  0  0  0
  5  6  1  0  0  0  0
  5 39  1  0  0  0  0
  5 40  1  0  0  0  0
  6  1  1  0  0  0  0
  6  7  2  0  0  0  0
  6  8  2  0  0  0  0
  9 41  1  0  0  0  0
 10 12  1  0  0  0  0
 10 42  1  0  0  0  0
 11 19  1  0  0  0  0
 11 43  1  0  0  0  0
 11 44  1  0  0  0  0
 12 13  1  0  0  0  0
 12 45  1  0  0  0  0
 12 46  1  0  0  0  0
 13 14  2  0  0  0  0
 14 15  1  0  0  0  0
 14 47  1  0  0  0  0
 15 16  2  0  0  0  0
 15 25  1  0  0  0  0
 16 17  1  0  0  0  0
 16 48  1  0  0  0  0
 17 18  2  0  0  0  0
 17 49  1  0  0  0  0
 18 13  1  0  0  0  0
 18 50  1  0  0  0  0
 19 20  2  0  0  0  0
 20 21  1  0  0  0  0
 20 51  1  0  0  0  0
 21 22  2  0  0  0  0
 21 28  1  0  0  0  0
 22 23  1  0  0  0  0
 22 29  1  0  0  0  0
 23 24  2  0  0  0  0
 23 52  1  0  0  0  0
 24 19  1  0  0  0  0
 24 53  1  0  0  0  0
 25 26  1  0  0  0  0
 25 27  1  0  0  0  0
 25 54  1  0  0  0  0
 26 55  1  0  0  0  0
 26 56  1  0  0  0  0
 26 57  1  0  0  0  0
 27 58  1  0  0  0  0
 27 59  1  0  0  0  0
 27 60  1  0  0  0  0
 29 30  1  0  0  0  0
 30 31  2  0  0  0  0
 30 32  1  0  0  0  0
 32 33  1  0  0  0  0
 32 61  1  0  0  0  0
 33 62  1  0  0  0  0
 33 63  1  0  0  0  0
 33 64  1  0  0  0  0
M  END
$$$$
Dataset (15)
 OpenBabel02101614293D

 78 81  0  0  0  0  0  0  0  0999 V2000
    7.0113   -2.1593    1.6101 C   0  0  0  0  0  0  0  0  0  0  0  0
    5.9977   -1.1078    2.1633 C   0  0  2  0  0  0  0  0  0  0  0  0
    5.1685   -0.4040    1.0227 C   0  0  1  0  0  0  0  0  0  0  0  0
    4.3421   -1.3586    0.0916 C   0  0  2  0  0  0  0  0  0  0  0  0
    5.2355   -2.3661   -0.6830 C   0  0  0  0  0  0  0  0  0  0  0  0
    6.1817   -3.3640    0.5168 S   0  0  0  0  0  0  0  0  0  0  0  0
    7.2565   -4.2887   -0.2292 O   0  0  0  0  0  0  0  0  0  0  0  0
    5.1676   -4.2642    1.3729 O   0  0  0  0  0  0  0  0  0  0  0  0
    4.2426    0.4991    1.6355 O   0  0  0  0  0  0  0  0  0  0  0  0
    3.5340   -0.5486   -0.8674 N   0  0  0  0  0  0  0  0  0  0  0  0
    6.7481   -0.0594    3.0599 C   0  0  0  0  0  0  0  0  0  0  0  0
    2.3539   -1.2208   -1.4689 C   0  0  0  0  0  0  0  0  0  0  0  0
    1.5559   -0.2731   -2.2888 C   0  0  0  0  0  0  0  0  0  0  0  0
    0.3099    0.2204   -1.8325 C   0  0  0  0  0  0  0  0  0  0  0  0
   -0.4842    1.0876   -2.6239 C   0  0  0  0  0  0  0  0  0  0  0  0
    0.0013    1.4505   -3.9046 C   0  0  0  0  0  0  0  0  0  0  0  0
    1.2462    0.9865   -4.3645 C   0  0  0  0  0  0  0  0  0  0  0  0
    2.0206    0.1348   -3.5595 C   0  0  0  0  0  0  0  0  0  0  0  0
    7.4086   -0.6569    4.2598 C   0  0  0  0  0  0  0  0  0  0  0  0
    6.6323   -0.9780    5.3947 C   0  0  0  0  0  0  0  0  0  0  0  0
    7.1771   -1.6335    6.5260 C   0  0  0  0  0  0  0  0  0  0  0  0
    8.5625   -1.9438    6.5594 C   0  0  0  0  0  0  0  0  0  0  0  0
    9.3569   -1.5862    5.4187 C   0  0  0  0  0  0  0  0  0  0  0  0
    8.7934   -0.9434    4.2591 C   0  0  0  0  0  0  0  0  0  0  0  0
   -1.7988    1.6110   -2.1213 C   0  0  0  0  0  0  0  0  0  0  0  0
   -1.6120    2.5375   -0.8874 C   0  0  0  0  0  0  0  0  0  0  0  0
   -2.8219    0.4740   -1.8410 C   0  0  0  0  0  0  0  0  0  0  0  0
    6.2718   -1.9684    7.6675 C   0  0  0  0  0  0  0  0  0  0  0  0
    9.0624   -2.5696    7.7114 O   0  0  0  0  0  0  0  0  0  0  0  0
    5.8210   -3.4620    7.7777 C   0  0  2  0  0  0  0  0  0  0  0  0
    3.6888   -4.0356    7.1561 C   0  0  0  0  0  0  0  0  0  0  0  0
    4.9613   -3.9124    6.7070 N   0  0  0  0  0  0  0  0  0  0  0  0
    4.9150   -3.6671    9.0283 C   0  0  0  0  0  0  0  0  0  0  0  0
    3.6191   -3.8590    8.4842 O   0  0  0  0  0  0  0  0  0  0  0  0
    5.3798   -4.2736    5.3705 C   0  0  0  0  0  0  0  0  0  0  0  0
    6.4524   -5.3947    5.3720 C   0  0  0  0  0  0  0  0  0  0  0  0
    6.7961   -5.9117    3.9602 C   0  0  0  0  0  0  0  0  0  0  0  0
    2.6772   -4.3242    6.4766 O   0  0  0  0  0  0  0  0  0  0  0  0
    7.7958   -1.6606    1.0362 H   0  0  0  0  0  0  0  0  0  0  0  0
    7.4760   -2.7228    2.4204 H   0  0  0  0  0  0  0  0  0  0  0  0
    5.2814   -1.6414    2.7973 H   0  0  0  0  0  0  0  0  0  0  0  0
    5.8476    0.1919    0.4054 H   0  0  0  0  0  0  0  0  0  0  0  0
    3.6598   -1.9196    0.7395 H   0  0  0  0  0  0  0  0  0  0  0  0
    4.6375   -3.0467   -1.2878 H   0  0  0  0  0  0  0  0  0  0  0  0
    5.9316   -1.8330   -1.3337 H   0  0  0  0  0  0  0  0  0  0  0  0
    3.7944    0.9580    0.8943 H   0  0  0  0  0  0  0  0  0  0  0  0
    4.1527   -0.2515   -1.6263 H   0  0  0  0  0  0  0  0  0  0  0  0
    7.4809    0.4662    2.4413 H   0  0  0  0  0  0  0  0  0  0  0  0
    6.0514    0.7060    3.4103 H   0  0  0  0  0  0  0  0  0  0  0  0
    2.6717   -2.0479   -2.1069 H   0  0  0  0  0  0  0  0  0  0  0  0
    1.7344   -1.6467   -0.6741 H   0  0  0  0  0  0  0  0  0  0  0  0
   -0.0256   -0.0582   -0.9065 H   0  0  0  0  0  0  0  0  0  0  0  0
   -0.5477    2.0574   -4.5182 H   0  0  0  0  0  0  0  0  0  0  0  0
    1.5869    1.2642   -5.2884 H   0  0  0  0  0  0  0  0  0  0  0  0
    2.9221   -0.1972   -3.9122 H   0  0  0  0  0  0  0  0  0  0  0  0
    5.6345   -0.7484    5.3807 H   0  0  0  0  0  0  0  0  0  0  0  0
   10.3578   -1.7949    5.4241 H   0  0  0  0  0  0  0  0  0  0  0  0
    9.3264   -0.6642    3.3669 H   0  0  0  0  0  0  0  0  0  0  0  0
   -2.2581    2.2358   -2.8940 H   0  0  0  0  0  0  0  0  0  0  0  0
   -2.5657    2.9893   -0.6051 H   0  0  0  0  0  0  0  0  0  0  0  0
   -1.2267    1.9817   -0.0301 H   0  0  0  0  0  0  0  0  0  0  0  0
   -0.9145    3.3449   -1.1221 H   0  0  0  0  0  0  0  0  0  0  0  0
   -3.8008    0.8973   -1.6036 H   0  0  0  0  0  0  0  0  0  0  0  0
   -2.5051   -0.1472   -1.0010 H   0  0  0  0  0  0  0  0  0  0  0  0
   -2.9355   -0.1621   -2.7217 H   0  0  0  0  0  0  0  0  0  0  0  0
    5.3699   -1.3509    7.6326 H   0  0  0  0  0  0  0  0  0  0  0  0
    6.7812   -1.6885    8.5929 H   0  0  0  0  0  0  0  0  0  0  0  0
   10.0250   -2.6734    7.5497 H   0  0  0  0  0  0  0  0  0  0  0  0
    6.6973   -4.1099    7.8826 H   0  0  0  0  0  0  0  0  0  0  0  0
    5.1944   -4.5636    9.5876 H   0  0  0  0  0  0  0  0  0  0  0  0
    4.9086   -2.8110    9.7084 H   0  0  0  0  0  0  0  0  0  0  0  0
    4.5264   -4.6165    4.7750 H   0  0  0  0  0  0  0  0  0  0  0  0
    5.7785   -3.4036    4.8593 H   0  0  0  0  0  0  0  0  0  0  0  0
    7.3771   -5.0233    5.8221 H   0  0  0  0  0  0  0  0  0  0  0  0
    6.0894   -6.2328    5.9726 H   0  0  0  0  0  0  0  0  0  0  0  0
    7.2069   -5.1036    3.3551 H   0  0  0  0  0  0  0  0  0  0  0  0
    7.5385   -6.7078    4.0323 H   0  0  0  0  0  0  0  0  0  0  0  0
    5.9084   -6.3100    3.4663 H   0  0  0  0  0  0  0  0  0  0  0  0
  1  2  1  0  0  0  0
  1 39  1  0  0  0  0
  1 40  1  0  0  0  0
  2  3  1  0  0  0  0
  2 11  1  0  0  0  0
  2 41  1  1  0  0  0
  3  4  1  0  0  0  0
  3  9  1  0  0  0  0
  3 42  1  6  0  0  0
  4  5  1  0  0  0  0
  4 10  1  0  0  0  0
  4 43  1  1  0  0  0
  5  6  1  0  0  0  0
  5 44  1  0  0  0  0
  5 45  1  0  0  0  0
  6  1  1  0  0  0  0
  6  7  2  0  0  0  0
  6  8  2  0  0  0  0
  9 46  1  0  0  0  0
 10 12  1  0  0  0  0
 10 47  1  0  0  0  0
 11 19  1  0  0  0  0
 11 48  1  0  0  0  0
 11 49  1  0  0  0  0
 12 13  1  0  0  0  0
 12 50  1  0  0  0  0
 12 51  1  0  0  0  0
 13 14  2  0  0  0  0
 14 15  1  0  0  0  0
 14 52  1  0  0  0  0
 15 16  2  0  0  0  0
 15 25  1  0  0  0  0
 16 17  1  0  0  0  0
 16 53  1  0  0  0  0
 17 18  2  0  0  0  0
 17 54  1  0  0  0  0
 18 13  1  0  0  0  0
 18 55  1  0  0  0  0
 19 20  2  0  0  0  0
 20 21  1  0  0  0  0
 20 56  1  0  0  0  0
 21 22  2  0  0  0  0
 21 28  1  0  0  0  0
 22 23  1  0  0  0  0
 22 29  1  0  0  0  0
 23 24  2  0  0  0  0
 23 57  1  0  0  0  0
 24 19  1  0  0  0  0
 24 58  1  0  0  0  0
 25 26  1  0  0  0  0
 25 27  1  0  0  0  0
 25 59  1  0  0  0  0
 26 60  1  0  0  0  0
 26 61  1  0  0  0  0
 26 62  1  0  0  0  0
 27 63  1  0  0  0  0
 27 64  1  0  0  0  0
 27 65  1  0  0  0  0
 28 30  1  0  0  0  0
 28 66  1  0  0  0  0
 28 67  1  0  0  0  0
 29 68  1  0  0  0  0
 30 33  1  0  0  0  0
 30 69  1  1  0  0  0
 31 32  1  0  0  0  0
 31 34  1  0  0  0  0
 31 38  2  0  0  0  0
 32 30  1  0  0  0  0
 32 35  1  0  0  0  0
 33 34  1  0  0  0  0
 33 70  1  0  0  0  0
 33 71  1  0  0  0  0
 35 36  1  0  0  0  0
 35 72  1  0  0  0  0
 35 73  1  0  0  0  0
 36 37  1  0  0  0  0
 36 74  1  0  0  0  0
 36 75  1  0  0  0  0
 37 76  1  0  0  0  0
 37 77  1  0  0  0  0
 37 78  1  0  0  0  0
M  END
$$$$
Dataset (16)
 OpenBabel02101614293D

 56 57  0  0  0  0  0  0  0  0999 V2000
    5.0010    4.1496    4.0959 C   0  0  1  0  0  0  0  0  0  0  0  0
    4.2745    2.9190    3.4616 C   0  0  1  0  0  0  0  0  0  0  0  0
    4.2413    2.9441    1.9090 C   0  0  0  0  0  0  0  0  0  0  0  0
    4.9221    1.7079    3.8525 O   0  0  0  0  0  0  0  0  0  0  0  0
    3.3251    3.9924    1.4052 N   0  0  0  0  0  0  0  0  0  0  0  0
    4.2641    5.3412    3.7780 N   0  0  0  0  0  0  0  0  0  0  0  0
    3.3368    4.1761   -0.0620 C   0  0  0  0  0  0  0  0  0  0  0  0
    2.5133    5.3630   -0.3999 C   0  0  0  0  0  0  0  0  0  0  0  0
    1.1065    5.2555   -0.4900 C   0  0  0  0  0  0  0  0  0  0  0  0
    0.2932    6.3709   -0.8121 C   0  0  0  0  0  0  0  0  0  0  0  0
    0.9298    7.6157   -1.0349 C   0  0  0  0  0  0  0  0  0  0  0  0
    2.3253    7.7428   -0.9332 C   0  0  0  0  0  0  0  0  0  0  0  0
    3.1134    6.6227   -0.6203 C   0  0  0  0  0  0  0  0  0  0  0  0
    4.7779    6.5157    3.3156 C   0  0  0  0  0  0  0  0  0  0  0  0
    6.0063    6.6802    3.1216 O   0  0  0  0  0  0  0  0  0  0  0  0
    3.8512    7.6296    3.0622 C   0  0  0  0  0  0  0  0  0  0  0  0
   -1.1981    6.2434   -0.9114 C   0  0  0  0  0  0  0  0  0  0  0  0
   -1.8316    5.8391    0.4484 C   0  0  0  0  0  0  0  0  0  0  0  0
   -1.6240    5.2809   -2.0549 C   0  0  0  0  0  0  0  0  0  0  0  0
    5.1353    4.0477    5.6473 C   0  0  0  0  0  0  0  0  0  0  0  0
    5.8274    5.2339    6.2243 C   0  0  0  0  0  0  0  0  0  0  0  0
    5.7314    7.4362    7.2996 C   0  0  0  0  0  0  0  0  0  0  0  0
    5.0842    6.2887    6.8053 C   0  0  0  0  0  0  0  0  0  0  0  0
    7.2362    5.3489    6.1576 C   0  0  0  0  0  0  0  0  0  0  0  0
    7.8890    6.4877    6.6673 C   0  0  0  0  0  0  0  0  0  0  0  0
    7.1333    7.5321    7.2339 C   0  0  0  0  0  0  0  0  0  0  0  0
    5.0294    8.4089    7.8123 F   0  0  0  0  0  0  0  0  0  0  0  0
    9.1900    6.5776    6.6095 F   0  0  0  0  0  0  0  0  0  0  0  0
    6.0106    4.1906    3.6730 H   0  0  0  0  0  0  0  0  0  0  0  0
    3.2471    2.8675    3.8320 H   0  0  0  0  0  0  0  0  0  0  0  0
    5.2549    3.1174    1.5348 H   0  0  0  0  0  0  0  0  0  0  0  0
    3.8989    1.9735    1.5376 H   0  0  0  0  0  0  0  0  0  0  0  0
    4.7681    1.6366    4.8183 H   0  0  0  0  0  0  0  0  0  0  0  0
    2.3746    3.7240    1.6730 H   0  0  0  0  0  0  0  0  0  0  0  0
    3.3049    5.3102    3.9177 H   0  0  0  0  0  0  0  0  0  0  0  0
    2.9375    3.2843   -0.5556 H   0  0  0  0  0  0  0  0  0  0  0  0
    4.3635    4.3149   -0.4132 H   0  0  0  0  0  0  0  0  0  0  0  0
    0.6690    4.3463   -0.3197 H   0  0  0  0  0  0  0  0  0  0  0  0
    0.3799    8.4449   -1.2708 H   0  0  0  0  0  0  0  0  0  0  0  0
    2.7689    8.6515   -1.0865 H   0  0  0  0  0  0  0  0  0  0  0  0
    4.1276    6.7359   -0.5491 H   0  0  0  0  0  0  0  0  0  0  0  0
    4.3829    8.5117    2.6948 H   0  0  0  0  0  0  0  0  0  0  0  0
    3.3336    7.8946    3.9864 H   0  0  0  0  0  0  0  0  0  0  0  0
    3.1112    7.3328    2.3166 H   0  0  0  0  0  0  0  0  0  0  0  0
   -1.6296    7.2179   -1.1653 H   0  0  0  0  0  0  0  0  0  0  0  0
   -2.9208    5.8629    0.3800 H   0  0  0  0  0  0  0  0  0  0  0  0
   -1.5304    4.8319    0.7427 H   0  0  0  0  0  0  0  0  0  0  0  0
   -1.5237    6.5370    1.2299 H   0  0  0  0  0  0  0  0  0  0  0  0
   -2.7068    5.3160   -2.1941 H   0  0  0  0  0  0  0  0  0  0  0  0
   -1.3421    4.2499   -1.8314 H   0  0  0  0  0  0  0  0  0  0  0  0
   -1.1511    5.5755   -2.9947 H   0  0  0  0  0  0  0  0  0  0  0  0
    4.1414    3.9358    6.0872 H   0  0  0  0  0  0  0  0  0  0  0  0
    5.6998    3.1523    5.9177 H   0  0  0  0  0  0  0  0  0  0  0  0
    4.0648    6.2323    6.8541 H   0  0  0  0  0  0  0  0  0  0  0  0
    7.7925    4.6036    5.7296 H   0  0  0  0  0  0  0  0  0  0  0  0
    7.6068    8.3647    7.5971 H   0  0  0  0  0  0  0  0  0  0  0  0
  1  2  1  0  0  0  0
  1  6  1  0  0  0  0
  1 20  1  0  0  0  0
  1 29  1  6  0  0  0
  2  3  1  0  0  0  0
  2  4  1  0  0  0  0
  2 30  1  1  0  0  0
  3  5  1  0  0  0  0
  3 31  1  0  0  0  0
  3 32  1  0  0  0  0
  4 33  1  0  0  0  0
  5  7  1  0  0  0  0
  5 34  1  0  0  0  0
  6 14  1  0  0  0  0
  6 35  1  0  0  0  0
  7  8  1  0  0  0  0
  7 36  1  0  0  0  0
  7 37  1  0  0  0  0
  8  9  2  0  0  0  0
  9 10  1  0  0  0  0
  9 38  1  0  0  0  0
 10 11  2  0  0  0  0
 10 17  1  0  0  0  0
 11 12  1  0  0  0  0
 11 39  1  0  0  0  0
 12 13  2  0  0  0  0
 12 40  1  0  0  0  0
 13  8  1  0  0  0  0
 13 41  1  0  0  0  0
 14 15  2  0  0  0  0
 16 14  1  0  0  0  0
 16 42  1  0  0  0  0
 16 43  1  0  0  0  0
 16 44  1  0  0  0  0
 17 18  1  0  0  0  0
 17 19  1  0  0  0  0
 17 45  1  0  0  0  0
 18 46  1  0  0  0  0
 18 47  1  0  0  0  0
 18 48  1  0  0  0  0
 19 49  1  0  0  0  0
 19 50  1  0  0  0  0
 19 51  1  0  0  0  0
 20 21  1  0  0  0  0
 20 52  1  0  0  0  0
 20 53  1  0  0  0  0
 21 24  1  0  0  0  0
 22 23  1  0  0  0  0
 22 26  2  0  0  0  0
 22 27  1  0  0  0  0
 23 21  2  0  0  0  0
 23 54  1  0  0  0  0
 24 25  2  0  0  0  0
 24 55  1  0  0  0  0
 25 26  1  0  0  0  0
 25 28  1  0  0  0  0
 26 56  1  0  0  0  0
M  END
$$$$
Dataset (17)
 OpenBabel02101614293D

 48 50  0  0  0  0  0  0  0  0999 V2000
    2.1769   -3.5475   -4.0142 C   0  0  0  0  0  0  0  0  0  0  0  0
    1.2380   -2.3739   -4.4351 C   0  0  2  0  0  0  0  0  0  0  0  0
   -0.0289   -2.2896   -3.4998 C   0  0  1  0  0  0  0  0  0  0  0  0
    0.2714   -2.0085   -1.9811 C   0  0  2  0  0  0  0  0  0  0  0  0
    1.0996   -3.1552   -1.3301 C   0  0  0  0  0  0  0  0  0  0  0  0
    2.6440   -3.4369   -2.2569 S   0  0  0  0  0  0  0  0  0  0  0  0
    3.3460   -4.7960   -1.7790 O   0  0  0  0  0  0  0  0  0  0  0  0
    3.6392   -2.1975   -2.0500 O   0  0  0  0  0  0  0  0  0  0  0  0
   -0.8829   -1.2528   -3.9909 O   0  0  0  0  0  0  0  0  0  0  0  0
   -1.0120   -1.8021   -1.2445 N   0  0  0  0  0  0  0  0  0  0  0  0
    0.8750   -2.5035   -5.9609 C   0  0  0  0  0  0  0  0  0  0  0  0
   -0.9192   -1.2726    0.1398 C   0  0  0  0  0  0  0  0  0  0  0  0
   -2.2702   -1.1031    0.7299 C   0  0  0  0  0  0  0  0  0  0  0  0
   -2.9160    0.1559    0.7268 C   0  0  0  0  0  0  0  0  0  0  0  0
   -4.1661    0.3238    1.3513 C   0  0  0  0  0  0  0  0  0  0  0  0
   -4.7916   -0.7645    1.9831 C   0  0  0  0  0  0  0  0  0  0  0  0
   -4.1746   -2.0271    1.9658 C   0  0  0  0  0  0  0  0  0  0  0  0
   -2.9275   -2.1993    1.3376 C   0  0  0  0  0  0  0  0  0  0  0  0
    2.0756   -2.4740   -6.8534 C   0  0  0  0  0  0  0  0  0  0  0  0
    2.7123   -3.6727   -7.2596 C   0  0  0  0  0  0  0  0  0  0  0  0
    3.9283   -3.6429   -7.9705 C   0  0  0  0  0  0  0  0  0  0  0  0
    4.4952   -2.4098   -8.3480 C   0  0  0  0  0  0  0  0  0  0  0  0
    3.8387   -1.2135   -8.0059 C   0  0  0  0  0  0  0  0  0  0  0  0
    2.6457   -1.2443   -7.2588 C   0  0  0  0  0  0  0  0  0  0  0  0
    4.7893   -5.2433   -8.3737 Br  0  0  0  0  0  0  0  0  0  0  0  0
    5.6642   -2.3626   -9.0350 O   0  0  0  0  0  0  0  0  0  0  0  0
    1.6779   -4.5040   -4.1850 H   0  0  0  0  0  0  0  0  0  0  0  0
    3.1117   -3.5308   -4.5734 H   0  0  0  0  0  0  0  0  0  0  0  0
    1.7904   -1.4363   -4.3113 H   0  0  0  0  0  0  0  0  0  0  0  0
   -0.5835   -3.2310   -3.5794 H   0  0  0  0  0  0  0  0  0  0  0  0
    0.8503   -1.0799   -1.9257 H   0  0  0  0  0  0  0  0  0  0  0  0
    1.3897   -2.9138   -0.3081 H   0  0  0  0  0  0  0  0  0  0  0  0
    0.5209   -4.0815   -1.3274 H   0  0  0  0  0  0  0  0  0  0  0  0
   -1.7240   -1.3580   -3.5000 H   0  0  0  0  0  0  0  0  0  0  0  0
   -1.5009   -2.6990   -1.2098 H   0  0  0  0  0  0  0  0  0  0  0  0
    0.3166   -3.4310   -6.1179 H   0  0  0  0  0  0  0  0  0  0  0  0
    0.2051   -1.6924   -6.2601 H   0  0  0  0  0  0  0  0  0  0  0  0
   -0.3548   -1.9537    0.7797 H   0  0  0  0  0  0  0  0  0  0  0  0
   -0.3873   -0.3169    0.1313 H   0  0  0  0  0  0  0  0  0  0  0  0
   -2.4767    0.9625    0.2773 H   0  0  0  0  0  0  0  0  0  0  0  0
   -4.6175    1.2396    1.3508 H   0  0  0  0  0  0  0  0  0  0  0  0
   -5.6890   -0.6368    2.4568 H   0  0  0  0  0  0  0  0  0  0  0  0
   -4.6314   -2.8195    2.4162 H   0  0  0  0  0  0  0  0  0  0  0  0
   -2.4949   -3.1266    1.3405 H   0  0  0  0  0  0  0  0  0  0  0  0
    2.3093   -4.5793   -7.0090 H   0  0  0  0  0  0  0  0  0  0  0  0
    4.2342   -0.3165   -8.2935 H   0  0  0  0  0  0  0  0  0  0  0  0
    2.1986   -0.3598   -7.0065 H   0  0  0  0  0  0  0  0  0  0  0  0
    6.3574   -2.3451   -8.3412 H   0  0  0  0  0  0  0  0  0  0  0  0
  1  2  1  0  0  0  0
  1 27  1  0  0  0  0
  1 28  1  0  0  0  0
  2  3  1  0  0  0  0
  2 11  1  0  0  0  0
  2 29  1  1  0  0  0
  3  4  1  0  0  0  0
  3  9  1  0  0  0  0
  3 30  1  6  0  0  0
  4  5  1  0  0  0  0
  4 10  1  0  0  0  0
  4 31  1  1  0  0  0
  5  6  1  0  0  0  0
  5 32  1  0  0  0  0
  5 33  1  0  0  0  0
  6  1  1  0  0  0  0
  6  7  2  0  0  0  0
  6  8  2  0  0  0  0
  9 34  1  0  0  0  0
 10 12  1  0  0  0  0
 10 35  1  0  0  0  0
 11 19  1  0  0  0  0
 11 36  1  0  0  0  0
 11 37  1  0  0  0  0
 12 13  1  0  0  0  0
 12 38  1  0  0  0  0
 12 39  1  0  0  0  0
 13 14  2  0  0  0  0
 14 15  1  0  0  0  0
 14 40  1  0  0  0  0
 15 16  2  0  0  0  0
 15 41  1  0  0  0  0
 16 17  1  0  0  0  0
 16 42  1  0  0  0  0
 17 18  2  0  0  0  0
 17 43  1  0  0  0  0
 18 13  1  0  0  0  0
 18 44  1  0  0  0  0
 19 20  2  0  0  0  0
 20 21  1  0  0  0  0
 20 45  1  0  0  0  0
 21 22  2  0  0  0  0
 21 25  1  0  0  0  0
 22 23  1  0  0  0  0
 22 26  1  0  0  0  0
 23 24  2  0  0  0  0
 23 46  1  0  0  0  0
 24 19  1  0  0  0  0
 24 47  1  0  0  0  0
 26 48  1  0  0  0  0
M  END
$$$$
Dataset (18)
 OpenBabel02101614293D

 56 58  0  0  0  0  0  0  0  0999 V2000
    4.6273    3.5589   -5.5056 C   0  0  0  0  0  0  0  0  0  0  0  0
    5.5551    2.5920   -4.7051 C   0  0  2  0  0  0  0  0  0  0  0  0
    5.7945    3.0953   -3.2304 C   0  0  1  0  0  0  0  0  0  0  0  0
    4.5028    3.2054   -2.3446 C   0  0  2  0  0  0  0  0  0  0  0  0
    3.4934    4.2428   -2.9052 C   0  0  0  0  0  0  0  0  0  0  0  0
    3.0513    3.8371   -4.6300 S   0  0  0  0  0  0  0  0  0  0  0  0
    2.2466    5.0463   -5.3088 O   0  0  0  0  0  0  0  0  0  0  0  0
    2.1754    2.4943   -4.6701 O   0  0  0  0  0  0  0  0  0  0  0  0
    6.7018    2.2089   -2.5726 O   0  0  0  0  0  0  0  0  0  0  0  0
    4.8701    3.5867   -0.9464 N   0  0  0  0  0  0  0  0  0  0  0  0
    6.8989    2.3756   -5.4890 C   0  0  0  0  0  0  0  0  0  0  0  0
    3.8807    3.2731    0.1175 C   0  0  0  0  0  0  0  0  0  0  0  0
    4.3519    3.7296    1.4456 C   0  0  0  0  0  0  0  0  0  0  0  0
    4.3943    5.0980    1.8061 C   0  0  0  0  0  0  0  0  0  0  0  0
    4.8222    5.4867    3.1026 C   0  0  0  0  0  0  0  0  0  0  0  0
    5.2299    4.4654    3.9966 C   0  0  0  0  0  0  0  0  0  0  0  0
    5.1684    3.1174    3.6049 C   0  0  0  0  0  0  0  0  0  0  0  0
    4.7359    2.8011    2.3612 N   0  0  0  0  0  0  0  0  0  0  0  0
    6.7019    1.7693   -6.8402 C   0  0  0  0  0  0  0  0  0  0  0  0
    6.6167    2.5771   -7.9997 C   0  0  0  0  0  0  0  0  0  0  0  0
    6.3171    2.0158   -9.2560 C   0  0  0  0  0  0  0  0  0  0  0  0
    6.1239    0.6259   -9.3736 C   0  0  0  0  0  0  0  0  0  0  0  0
    6.2702   -0.1955   -8.2415 C   0  0  0  0  0  0  0  0  0  0  0  0
    6.5478    0.3713   -6.9850 C   0  0  0  0  0  0  0  0  0  0  0  0
    6.1525    3.1340  -10.7361 Br  0  0  0  0  0  0  0  0  0  0  0  0
    5.7777    0.0643  -10.5571 O   0  0  0  0  0  0  0  0  0  0  0  0
    4.8338    6.9254    3.5371 C   0  0  0  0  0  0  0  0  0  0  0  0
    3.4050    7.5347    3.5377 C   0  0  0  0  0  0  0  0  0  0  0  0
    5.8366    7.7845    2.7201 C   0  0  0  0  0  0  0  0  0  0  0  0
    5.1207    4.5219   -5.6445 H   0  0  0  0  0  0  0  0  0  0  0  0
    4.3695    3.1545   -6.4847 H   0  0  0  0  0  0  0  0  0  0  0  0
    5.0494    1.6228   -4.6429 H   0  0  0  0  0  0  0  0  0  0  0  0
    6.2799    4.0737   -3.2719 H   0  0  0  0  0  0  0  0  0  0  0  0
    4.0287    2.2176   -2.3361 H   0  0  0  0  0  0  0  0  0  0  0  0
    2.5732    4.2569   -2.3208 H   0  0  0  0  0  0  0  0  0  0  0  0
    3.9448    5.2370   -2.8887 H   0  0  0  0  0  0  0  0  0  0  0  0
    6.9180    2.6450   -1.7217 H   0  0  0  0  0  0  0  0  0  0  0  0
    5.0424    4.5957   -0.9338 H   0  0  0  0  0  0  0  0  0  0  0  0
    7.4186    3.3347   -5.5816 H   0  0  0  0  0  0  0  0  0  0  0  0
    7.5648    1.7231   -4.9162 H   0  0  0  0  0  0  0  0  0  0  0  0
    2.9184    3.7443   -0.0923 H   0  0  0  0  0  0  0  0  0  0  0  0
    3.7230    2.1909    0.1395 H   0  0  0  0  0  0  0  0  0  0  0  0
    4.0961    5.8034    1.1283 H   0  0  0  0  0  0  0  0  0  0  0  0
    5.5679    4.6894    4.9355 H   0  0  0  0  0  0  0  0  0  0  0  0
    5.4378    2.3729    4.2527 H   0  0  0  0  0  0  0  0  0  0  0  0
    6.7433    3.5884   -7.9292 H   0  0  0  0  0  0  0  0  0  0  0  0
    6.1600   -1.2078   -8.3241 H   0  0  0  0  0  0  0  0  0  0  0  0
    6.6224   -0.2437   -6.1717 H   0  0  0  0  0  0  0  0  0  0  0  0
    6.6001    0.0712  -11.0886 H   0  0  0  0  0  0  0  0  0  0  0  0
    5.1775    6.9868    4.5759 H   0  0  0  0  0  0  0  0  0  0  0  0
    3.4237    8.5401    3.9624 H   0  0  0  0  0  0  0  0  0  0  0  0
    3.0025    7.5937    2.5253 H   0  0  0  0  0  0  0  0  0  0  0  0
    2.7346    6.9235    4.1461 H   0  0  0  0  0  0  0  0  0  0  0  0
    5.8913    8.7929    3.1363 H   0  0  0  0  0  0  0  0  0  0  0  0
    5.5322    7.8566    1.6750 H   0  0  0  0  0  0  0  0  0  0  0  0
    6.8359    7.3462    2.7666 H   0  0  0  0  0  0  0  0  0  0  0  0
  1  2  1  0  0  0  0
  1 30  1  0  0  0  0
  1 31  1  0  0  0  0
  2  3  1  0  0  0  0
  2 11  1  0  0  0  0
  2 32  1  1  0  0  0
  3  4  1  0  0  0  0
  3  9  1  0  0  0  0
  3 33  1  6  0  0  0
  4  5  1  0  0  0  0
  4 10  1  0  0  0  0
  4 34  1  1  0  0  0
  5  6  1  0  0  0  0
  5 35  1  0  0  0  0
  5 36  1  0  0  0  0
  6  1  1  0  0  0  0
  6  7  2  0  0  0  0
  6  8  2  0  0  0  0
  9 37  1  0  0  0  0
 10 12  1  0  0  0  0
 10 38  1  0  0  0  0
 11 19  1  0  0  0  0
 11 39  1  0  0  0  0
 11 40  1  0  0  0  0
 12 13  1  0  0  0  0
 12 41  1  0  0  0  0
 12 42  1  0  0  0  0
 13 14  2  0  0  0  0
 14 15  1  0  0  0  0
 14 43  1  0  0  0  0
 15 16  2  0  0  0  0
 15 27  1  0  0  0  0
 16 17  1  0  0  0  0
 16 44  1  0  0  0  0
 17 18  2  0  0  0  0
 17 45  1  0  0  0  0
 18 13  1  0  0  0  0
 19 20  2  0  0  0  0
 20 21  1  0  0  0  0
 20 46  1  0  0  0  0
 21 22  2  0  0  0  0
 21 25  1  0  0  0  0
 22 23  1  0  0  0  0
 22 26  1  0  0  0  0
 23 24  2  0  0  0  0
 23 47  1  0  0  0  0
 24 19  1  0  0  0  0
 24 48  1  0  0  0  0
 26 49  1  0  0  0  0
 27 28  1  0  0  0  0
 27 29  1  0  0  0  0
 27 50  1  0  0  0  0
 28 51  1  0  0  0  0
 28 52  1  0  0  0  0
 28 53  1  0  0  0  0
 29 54  1  0  0  0  0
 29 55  1  0  0  0  0
 29 56  1  0  0  0  0
M  END
$$$$
Dataset (19)
 OpenBabel02101614293D

 60 62  0  0  0  0  0  0  0  0999 V2000
    0.7749    6.9493    1.1141 C   0  0  0  0  0  0  0  0  0  0  0  0
    2.1108    6.5503    0.4111 C   0  0  2  0  0  0  0  0  0  0  0  0
    3.0371    5.6919    1.3576 C   0  0  1  0  0  0  0  0  0  0  0  0
    2.4288    4.3310    1.8539 C   0  0  2  0  0  0  0  0  0  0  0  0
    1.1317    4.5249    2.6861 C   0  0  0  0  0  0  0  0  0  0  0  0
   -0.1083    5.4837    1.7490 S   0  0  0  0  0  0  0  0  0  0  0  0
   -1.3153    5.9325    2.7043 O   0  0  0  0  0  0  0  0  0  0  0  0
   -0.6640    4.6066    0.5266 O   0  0  0  0  0  0  0  0  0  0  0  0
    4.2534    5.3916    0.6695 O   0  0  0  0  0  0  0  0  0  0  0  0
    3.4462    3.5902    2.6624 N   0  0  0  0  0  0  0  0  0  0  0  0
    2.8344    7.8337   -0.1394 C   0  0  0  0  0  0  0  0  0  0  0  0
    3.1930    2.1445    2.9074 C   0  0  0  0  0  0  0  0  0  0  0  0
    4.3220    1.5081    3.6388 C   0  0  0  0  0  0  0  0  0  0  0  0
    5.3007    0.7385    2.9632 C   0  0  0  0  0  0  0  0  0  0  0  0
    6.3691    0.0825    3.6410 C   0  0  0  0  0  0  0  0  0  0  0  0
    6.4224    0.2510    5.0520 C   0  0  0  0  0  0  0  0  0  0  0  0
    5.4654    1.0143    5.7409 C   0  0  0  0  0  0  0  0  0  0  0  0
    4.4238    1.6393    5.0412 C   0  0  0  0  0  0  0  0  0  0  0  0
    2.0146    8.5914   -1.1320 C   0  0  0  0  0  0  0  0  0  0  0  0
    1.2000    9.6771   -0.7243 C   0  0  0  0  0  0  0  0  0  0  0  0
    0.3163   10.2977   -1.6274 C   0  0  0  0  0  0  0  0  0  0  0  0
    0.2621    9.8628   -2.9658 C   0  0  0  0  0  0  0  0  0  0  0  0
    1.1146    8.8309   -3.3997 C   0  0  0  0  0  0  0  0  0  0  0  0
    1.9812    8.1964   -2.4906 C   0  0  0  0  0  0  0  0  0  0  0  0
    7.3788   -0.7431    2.8545 C   0  0  0  0  0  0  0  0  0  0  0  0
    8.4675   -1.4496    3.7387 C   0  0  0  0  0  0  0  0  0  0  0  0
    8.1450    0.1941    1.8630 C   0  0  0  0  0  0  0  0  0  0  0  0
    6.6455   -1.8845    2.0689 C   0  0  0  0  0  0  0  0  0  0  0  0
   -0.7917   11.6678   -1.0248 Br  0  0  0  0  0  0  0  0  0  0  0  0
   -0.6156   10.4152   -3.8361 O   0  0  0  0  0  0  0  0  0  0  0  0
    0.9791    7.6150    1.9548 H   0  0  0  0  0  0  0  0  0  0  0  0
    0.0901    7.4501    0.4291 H   0  0  0  0  0  0  0  0  0  0  0  0
    1.8573    5.9216   -0.4495 H   0  0  0  0  0  0  0  0  0  0  0  0
    3.3069    6.2993    2.2255 H   0  0  0  0  0  0  0  0  0  0  0  0
    2.1833    3.7398    0.9654 H   0  0  0  0  0  0  0  0  0  0  0  0
    0.6786    3.5677    2.9386 H   0  0  0  0  0  0  0  0  0  0  0  0
    1.3608    5.0608    3.6074 H   0  0  0  0  0  0  0  0  0  0  0  0
    4.8425    4.9935    1.3452 H   0  0  0  0  0  0  0  0  0  0  0  0
    3.5205    4.0576    3.5706 H   0  0  0  0  0  0  0  0  0  0  0  0
    3.1003    8.4840    0.6999 H   0  0  0  0  0  0  0  0  0  0  0  0
    3.7784    7.5510   -0.6136 H   0  0  0  0  0  0  0  0  0  0  0  0
    2.2824    2.0067    3.4953 H   0  0  0  0  0  0  0  0  0  0  0  0
    3.0354    1.6389    1.9517 H   0  0  0  0  0  0  0  0  0  0  0  0
    5.2193    0.6541    1.9477 H   0  0  0  0  0  0  0  0  0  0  0  0
    7.1576   -0.1804    5.6131 H   0  0  0  0  0  0  0  0  0  0  0  0
    5.5218    1.1084    6.7573 H   0  0  0  0  0  0  0  0  0  0  0  0
    3.7315    2.1789    5.5676 H   0  0  0  0  0  0  0  0  0  0  0  0
    1.2182    9.9987    0.2467 H   0  0  0  0  0  0  0  0  0  0  0  0
    1.0965    8.5282   -4.3759 H   0  0  0  0  0  0  0  0  0  0  0  0
    2.5797    7.4364   -2.8255 H   0  0  0  0  0  0  0  0  0  0  0  0
    9.1623   -2.0294    3.1260 H   0  0  0  0  0  0  0  0  0  0  0  0
    9.0553   -0.7136    4.2929 H   0  0  0  0  0  0  0  0  0  0  0  0
    8.0027   -2.1371    4.4509 H   0  0  0  0  0  0  0  0  0  0  0  0
    8.9084   -0.3601    1.3133 H   0  0  0  0  0  0  0  0  0  0  0  0
    8.6388    1.0001    2.4113 H   0  0  0  0  0  0  0  0  0  0  0  0
    7.4742    0.6442    1.1296 H   0  0  0  0  0  0  0  0  0  0  0  0
    7.3604   -2.5213    1.5423 H   0  0  0  0  0  0  0  0  0  0  0  0
    5.9565   -1.4880    1.3216 H   0  0  0  0  0  0  0  0  0  0  0  0
    6.0752   -2.5145    2.7566 H   0  0  0  0  0  0  0  0  0  0  0  0
   -1.4281    9.8755   -3.7288 H   0  0  0  0  0  0  0  0  0  0  0  0
  1  2  1  0  0  0  0
  1 31  1  0  0  0  0
  1 32  1  0  0  0  0
  2  3  1  0  0  0  0
  2 11  1  0  0  0  0
  2 33  1  6  0  0  0
  3  4  1  0  0  0  0
  3  9  1  0  0  0  0
  3 34  1  1  0  0  0
  4  5  1  0  0  0  0
  4 10  1  0  0  0  0
  4 35  1  6  0  0  0
  5  6  1  0  0  0  0
  5 36  1  0  0  0  0
  5 37  1  0  0  0  0
  6  1  1  0  0  0  0
  6  7  2  0  0  0  0
  6  8  2  0  0  0  0
  9 38  1  0  0  0  0
 10 12  1  0  0  0  0
 10 39  1  0  0  0  0
 11 19  1  0  0  0  0
 11 40  1  0  0  0  0
 11 41  1  0  0  0  0
 12 13  1  0  0  0  0
 12 42  1  0  0  0  0
 12 43  1  0  0  0  0
 13 14  2  0  0  0  0
 14 15  1  0  0  0  0
 14 44  1  0  0  0  0
 15 16  2  0  0  0  0
 15 25  1  0  0  0  0
 16 17  1  0  0  0  0
 16 45  1  0  0  0  0
 17 18  2  0  0  0  0
 17 46  1  0  0  0  0
 18 13  1  0  0  0  0
 18 47  1  0  0  0  0
 19 20  2  0  0  0  0
 20 21  1  0  0  0  0
 20 48  1  0  0  0  0
 21 22  2  0  0  0  0
 21 29  1  0  0  0  0
 22 23  1  0  0  0  0
 22 30  1  0  0  0  0
 23 24  2  0  0  0  0
 23 49  1  0  0  0  0
 24 19  1  0  0  0  0
 24 50  1  0  0  0  0
 25 26  1  0  0  0  0
 25 27  1  0  0  0  0
 25 28  1  0  0  0  0
 26 51  1  0  0  0  0
 26 52  1  0  0  0  0
 26 53  1  0  0  0  0
 27 54  1  0  0  0  0
 27 55  1  0  0  0  0
 27 56  1  0  0  0  0
 28 57  1  0  0  0  0
 28 58  1  0  0  0  0
 28 59  1  0  0  0  0
 30 60  1  0  0  0  0
M  END
$$$$
Dataset (20)
 OpenBabel02101614293D

 58 60  0  0  0  0  0  0  0  0999 V2000
    4.4475    4.0531   -0.1781 C   0  0  0  0  0  0  0  0  0  0  0  0
    3.1662    3.7729   -1.0267 C   0  0  2  0  0  0  0  0  0  0  0  0
    2.0629    2.9966   -0.2121 C   0  0  1  0  0  0  0  0  0  0  0  0
    1.5591    3.7203    1.0839 C   0  0  2  0  0  0  0  0  0  0  0  0
    2.6818    3.9633    2.1308 C   0  0  0  0  0  0  0  0  0  0  0  0
    4.0266    4.9337    1.3663 S   0  0  0  0  0  0  0  0  0  0  0  0
    5.2992    5.0145    2.3353 O   0  0  0  0  0  0  0  0  0  0  0  0
    3.4973    6.4080    1.0244 O   0  0  0  0  0  0  0  0  0  0  0  0
    0.9235    2.8056   -1.0543 O   0  0  0  0  0  0  0  0  0  0  0  0
    0.4442    2.9385    1.7008 N   0  0  0  0  0  0  0  0  0  0  0  0
    3.5540    3.0203   -2.3465 C   0  0  0  0  0  0  0  0  0  0  0  0
   -0.4522    3.6872    2.6134 C   0  0  0  0  0  0  0  0  0  0  0  0
   -1.6312    2.8839    3.0218 C   0  0  0  0  0  0  0  0  0  0  0  0
   -2.9157    3.1870    2.5144 C   0  0  0  0  0  0  0  0  0  0  0  0
   -4.0601    2.5122    2.9846 C   0  0  0  0  0  0  0  0  0  0  0  0
   -3.9217    1.4920    3.9473 C   0  0  0  0  0  0  0  0  0  0  0  0
   -2.6446    1.1416    4.4203 C   0  0  0  0  0  0  0  0  0  0  0  0
   -1.5070    1.8316    3.9593 C   0  0  0  0  0  0  0  0  0  0  0  0
    4.5015    3.7800   -3.2141 C   0  0  0  0  0  0  0  0  0  0  0  0
    5.8768    3.4458   -3.2611 C   0  0  0  0  0  0  0  0  0  0  0  0
    6.7788    4.1949   -4.0407 C   0  0  0  0  0  0  0  0  0  0  0  0
    6.3109    5.2779   -4.8109 C   0  0  0  0  0  0  0  0  0  0  0  0
    4.9450    5.6116   -4.7844 C   0  0  0  0  0  0  0  0  0  0  0  0
    4.0487    4.8732   -3.9900 C   0  0  0  0  0  0  0  0  0  0  0  0
   -5.2872    2.8179    2.4591 O   0  0  0  0  0  0  0  0  0  0  0  0
   -6.1045    3.7373    3.2227 C   0  0  0  0  0  0  0  0  0  0  0  0
    8.5866    3.7504   -4.0284 Br  0  0  0  0  0  0  0  0  0  0  0  0
    7.1599    6.0048   -5.5777 O   0  0  0  0  0  0  0  0  0  0  0  0
   -5.5603    5.1911    3.2105 C   0  0  0  0  0  0  0  0  0  0  0  0
   -7.5143    3.6720    2.5903 C   0  0  0  0  0  0  0  0  0  0  0  0
    4.9342    3.1116    0.0894 H   0  0  0  0  0  0  0  0  0  0  0  0
    5.1608    4.6759   -0.7235 H   0  0  0  0  0  0  0  0  0  0  0  0
    2.7380    4.7401   -1.3116 H   0  0  0  0  0  0  0  0  0  0  0  0
    2.4432    2.0067    0.0547 H   0  0  0  0  0  0  0  0  0  0  0  0
    1.1697    4.6930    0.7649 H   0  0  0  0  0  0  0  0  0  0  0  0
    2.3106    4.5294    2.9866 H   0  0  0  0  0  0  0  0  0  0  0  0
    3.0866    3.0104    2.4777 H   0  0  0  0  0  0  0  0  0  0  0  0
    0.2954    2.2789   -0.5193 H   0  0  0  0  0  0  0  0  0  0  0  0
    0.8532    2.1591    2.2227 H   0  0  0  0  0  0  0  0  0  0  0  0
    3.9832    2.0489   -2.0821 H   0  0  0  0  0  0  0  0  0  0  0  0
    2.6595    2.8113   -2.9392 H   0  0  0  0  0  0  0  0  0  0  0  0
   -0.7796    4.6051    2.1178 H   0  0  0  0  0  0  0  0  0  0  0  0
    0.0883    3.9816    3.5133 H   0  0  0  0  0  0  0  0  0  0  0  0
   -3.0287    3.9114    1.7990 H   0  0  0  0  0  0  0  0  0  0  0  0
   -4.7490    1.0007    4.2942 H   0  0  0  0  0  0  0  0  0  0  0  0
   -2.5455    0.3910    5.1074 H   0  0  0  0  0  0  0  0  0  0  0  0
   -0.5893    1.5686    4.3249 H   0  0  0  0  0  0  0  0  0  0  0  0
    6.2359    2.6629   -2.7107 H   0  0  0  0  0  0  0  0  0  0  0  0
    4.6021    6.4004   -5.3372 H   0  0  0  0  0  0  0  0  0  0  0  0
    3.0617    5.1415   -3.9828 H   0  0  0  0  0  0  0  0  0  0  0  0
   -6.1953    3.4038    4.2630 H   0  0  0  0  0  0  0  0  0  0  0  0
    7.5085    6.6943   -4.9729 H   0  0  0  0  0  0  0  0  0  0  0  0
   -6.2831    5.8759    3.6571 H   0  0  0  0  0  0  0  0  0  0  0  0
   -5.3614    5.5145    2.1876 H   0  0  0  0  0  0  0  0  0  0  0  0
   -4.6367    5.2530    3.7876 H   0  0  0  0  0  0  0  0  0  0  0  0
   -8.2079    4.3304    3.1148 H   0  0  0  0  0  0  0  0  0  0  0  0
   -7.9015    2.6541    2.6517 H   0  0  0  0  0  0  0  0  0  0  0  0
   -7.4737    3.9674    1.5401 H   0  0  0  0  0  0  0  0  0  0  0  0
  1  2  1  0  0  0  0
  1 31  1  0  0  0  0
  1 32  1  0  0  0  0
  2  3  1  0  0  0  0
  2 11  1  0  0  0  0
  2 33  1  6  0  0  0
  3  4  1  0  0  0  0
  3  9  1  0  0  0  0
  3 34  1  1  0  0  0
  4  5  1  0  0  0  0
  4 10  1  0  0  0  0
  4 35  1  6  0  0  0
  5  6  1  0  0  0  0
  5 36  1  0  0  0  0
  5 37  1  0  0  0  0
  6  1  1  0  0  0  0
  6  7  2  0  0  0  0
  6  8  2  0  0  0  0
  9 38  1  0  0  0  0
 10 12  1  0  0  0  0
 10 39  1  0  0  0  0
 11 19  1  0  0  0  0
 11 40  1  0  0  0  0
 11 41  1  0  0  0  0
 12 13  1  0  0  0  0
 12 42  1  0  0  0  0
 12 43  1  0  0  0  0
 13 14  2  0  0  0  0
 14 15  1  0  0  0  0
 14 44  1  0  0  0  0
 15 16  2  0  0  0  0
 15 25  1  0  0  0  0
 16 17  1  0  0  0  0
 16 45  1  0  0  0  0
 17 18  2  0  0  0  0
 17 46  1  0  0  0  0
 18 13  1  0  0  0  0
 18 47  1  0  0  0  0
 19 20  2  0  0  0  0
 20 21  1  0  0  0  0
 20 48  1  0  0  0  0
 21 22  2  0  0  0  0
 21 27  1  0  0  0  0
 22 23  1  0  0  0  0
 22 28  1  0  0  0  0
 23 24  2  0  0  0  0
 23 49  1  0  0  0  0
 24 19  1  0  0  0  0
 24 50  1  0  0  0  0
 25 26  1  0  0  0  0
 26 29  1  0  0  0  0
 26 30  1  0  0  0  0
 26 51  1  0  0  0  0
 28 52  1  0  0  0  0
 29 53  1  0  0  0  0
 29 54  1  0  0  0  0
 29 55  1  0  0  0  0
 30 56  1  0  0  0  0
 30 57  1  0  0  0  0
 30 58  1  0  0  0  0
M  END
$$$$
Dataset (21)
 OpenBabel02101614293D

 48 50  0  0  0  0  0  0  0  0999 V2000
    0.6664   -2.8585    5.0961 C   0  0  0  0  0  0  0  0  0  0  0  0
    1.3019   -1.4652    4.7859 C   0  0  2  0  0  0  0  0  0  0  0  0
    1.9865   -1.4241    3.3673 C   0  0  1  0  0  0  0  0  0  0  0  0
    1.0376   -1.7356    2.1590 C   0  0  2  0  0  0  0  0  0  0  0  0
    0.4251   -3.1616    2.2108 C   0  0  0  0  0  0  0  0  0  0  0  0
   -0.4872   -3.3718    3.7776 S   0  0  0  0  0  0  0  0  0  0  0  0
   -0.9377   -4.8945    3.9919 O   0  0  0  0  0  0  0  0  0  0  0  0
   -1.7715   -2.4123    3.7846 O   0  0  0  0  0  0  0  0  0  0  0  0
    2.5248   -0.1161    3.1547 O   0  0  0  0  0  0  0  0  0  0  0  0
    1.7896   -1.5671    0.8846 N   0  0  0  0  0  0  0  0  0  0  0  0
    2.2945   -1.0590    5.9312 C   0  0  0  0  0  0  0  0  0  0  0  0
    0.9929   -1.1872   -0.3053 C   0  0  0  0  0  0  0  0  0  0  0  0
    1.8756   -0.9900   -1.4846 C   0  0  0  0  0  0  0  0  0  0  0  0
    2.0373    0.2861   -2.0749 C   0  0  0  0  0  0  0  0  0  0  0  0
    2.8363    0.4561   -3.2222 C   0  0  0  0  0  0  0  0  0  0  0  0
    3.4896   -0.6524   -3.7902 C   0  0  0  0  0  0  0  0  0  0  0  0
    3.3518   -1.9271   -3.2078 C   0  0  0  0  0  0  0  0  0  0  0  0
    2.5533   -2.0921   -2.0580 C   0  0  0  0  0  0  0  0  0  0  0  0
    1.6480   -0.9310    7.2722 C   0  0  0  0  0  0  0  0  0  0  0  0
    1.7712   -1.9522    8.2446 C   0  0  0  0  0  0  0  0  0  0  0  0
    1.1078   -1.8602    9.4829 C   0  0  0  0  0  0  0  0  0  0  0  0
    0.3311   -0.7235    9.7799 C   0  0  0  0  0  0  0  0  0  0  0  0
    0.2225    0.3138    8.8352 C   0  0  0  0  0  0  0  0  0  0  0  0
    0.8720    0.2082    7.5909 C   0  0  0  0  0  0  0  0  0  0  0  0
    3.0033    1.9894   -3.9180 Cl  0  0  0  0  0  0  0  0  0  0  0  0
    1.2560   -3.2613   10.7008 Br  0  0  0  0  0  0  0  0  0  0  0  0
   -0.3147   -0.6170   10.9679 O   0  0  0  0  0  0  0  0  0  0  0  0
    4.1363   -3.2622   -3.8923 Cl  0  0  0  0  0  0  0  0  0  0  0  0
    1.4473   -3.6184    5.1832 H   0  0  0  0  0  0  0  0  0  0  0  0
    0.0953   -2.8371    6.0258 H   0  0  0  0  0  0  0  0  0  0  0  0
    0.4910   -0.7295    4.7704 H   0  0  0  0  0  0  0  0  0  0  0  0
    2.8230   -2.1295    3.3546 H   0  0  0  0  0  0  0  0  0  0  0  0
    0.2227   -1.0047    2.1975 H   0  0  0  0  0  0  0  0  0  0  0  0
   -0.2743   -3.3151    1.3881 H   0  0  0  0  0  0  0  0  0  0  0  0
    1.2119   -3.9182    2.1529 H   0  0  0  0  0  0  0  0  0  0  0  0
    3.0164   -0.1709    2.3079 H   0  0  0  0  0  0  0  0  0  0  0  0
    2.2613   -2.4508    0.6807 H   0  0  0  0  0  0  0  0  0  0  0  0
    3.1021   -1.7944    5.9704 H   0  0  0  0  0  0  0  0  0  0  0  0
    2.7670   -0.1033    5.6958 H   0  0  0  0  0  0  0  0  0  0  0  0
    0.2649   -1.9636   -0.5461 H   0  0  0  0  0  0  0  0  0  0  0  0
    0.4424   -0.2700   -0.0846 H   0  0  0  0  0  0  0  0  0  0  0  0
    1.5669    1.0992   -1.6686 H   0  0  0  0  0  0  0  0  0  0  0  0
    4.0603   -0.5329   -4.6302 H   0  0  0  0  0  0  0  0  0  0  0  0
    2.4565   -3.0228   -1.6373 H   0  0  0  0  0  0  0  0  0  0  0  0
    2.3364   -2.7808    8.0505 H   0  0  0  0  0  0  0  0  0  0  0  0
   -0.3340    1.1454    9.0508 H   0  0  0  0  0  0  0  0  0  0  0  0
    0.7732    0.9693    6.9158 H   0  0  0  0  0  0  0  0  0  0  0  0
   -1.1798   -1.0534   10.8202 H   0  0  0  0  0  0  0  0  0  0  0  0
  1  2  1  0  0  0  0
  1 29  1  0  0  0  0
  1 30  1  0  0  0  0
  2  3  1  0  0  0  0
  2 11  1  0  0  0  0
  2 31  1  6  0  0  0
  3  4  1  0  0  0  0
  3  9  1  0  0  0  0
  3 32  1  6  0  0  0
  4  5  1  0  0  0  0
  4 10  1  0  0  0  0
  4 33  1  1  0  0  0
  5  6  1  0  0  0  0
  5 34  1  0  0  0  0
  5 35  1  0  0  0  0
  6  1  1  0  0  0  0
  6  7  2  0  0  0  0
  6  8  2  0  0  0  0
  9 36  1  0  0  0  0
 10 12  1  0  0  0  0
 10 37  1  0  0  0  0
 11 19  1  0  0  0  0
 11 38  1  0  0  0  0
 11 39  1  0  0  0  0
 12 13  1  0  0  0  0
 12 40  1  0  0  0  0
 12 41  1  0  0  0  0
 13 14  2  0  0  0  0
 14 15  1  0  0  0  0
 14 42  1  0  0  0  0
 15 16  2  0  0  0  0
 15 25  1  0  0  0  0
 16 17  1  0  0  0  0
 16 43  1  0  0  0  0
 17 18  2  0  0  0  0
 17 28  1  0  0  0  0
 18 13  1  0  0  0  0
 18 44  1  0  0  0  0
 19 20  2  0  0  0  0
 20 21  1  0  0  0  0
 20 45  1  0  0  0  0
 21 22  2  0  0  0  0
 21 26  1  0  0  0  0
 22 23  1  0  0  0  0
 22 27  1  0  0  0  0
 23 24  2  0  0  0  0
 23 46  1  0  0  0  0
 24 19  1  0  0  0  0
 24 47  1  0  0  0  0
 27 48  1  0  0  0  0
M  END
$$$$
Dataset (22)
 OpenBabel02101614293D

 59 61  0  0  0  0  0  0  0  0999 V2000
    1.0225    7.4203    1.7571 C   0  0  0  0  0  0  0  0  0  0  0  0
    2.2601    7.0152    0.8971 C   0  0  2  0  0  0  0  0  0  0  0  0
    3.0551    5.8132    1.5370 C   0  0  1  0  0  0  0  0  0  0  0  0
    2.2450    4.4792    1.7167 C   0  0  2  0  0  0  0  0  0  0  0  0
    1.0097    4.6467    2.6443 C   0  0  0  0  0  0  0  0  0  0  0  0
   -0.0731    5.9896    2.0472 S   0  0  0  0  0  0  0  0  0  0  0  0
   -1.1772    6.3518    3.1509 O   0  0  0  0  0  0  0  0  0  0  0  0
   -0.7884    5.5561    0.6792 O   0  0  0  0  0  0  0  0  0  0  0  0
    4.1852    5.5145    0.7155 O   0  0  0  0  0  0  0  0  0  0  0  0
    3.1455    3.4118    2.2581 N   0  0  0  0  0  0  0  0  0  0  0  0
    3.1722    8.2684    0.6447 C   0  0  0  0  0  0  0  0  0  0  0  0
    2.6814    2.0035    2.1255 C   0  0  0  0  0  0  0  0  0  0  0  0
    3.7032    1.0295    2.5966 C   0  0  0  0  0  0  0  0  0  0  0  0
    4.5197    0.3143    1.6883 C   0  0  0  0  0  0  0  0  0  0  0  0
    5.4849   -0.6439    2.1093 C   0  0  0  0  0  0  0  0  0  0  0  0
    5.6038   -0.8543    3.5091 C   0  0  0  0  0  0  0  0  0  0  0  0
    4.7971   -0.1639    4.4264 C   0  0  0  0  0  0  0  0  0  0  0  0
    3.8531    0.7698    3.9749 C   0  0  0  0  0  0  0  0  0  0  0  0
    2.4733    9.3710   -0.0794 C   0  0  0  0  0  0  0  0  0  0  0  0
    1.8836   10.4454    0.6309 C   0  0  0  0  0  0  0  0  0  0  0  0
    1.1172   11.4159   -0.0392 C   0  0  0  0  0  0  0  0  0  0  0  0
    0.9519   11.3426   -1.4331 C   0  0  0  0  0  0  0  0  0  0  0  0
    1.5740   10.3107   -2.1583 C   0  0  0  0  0  0  0  0  0  0  0  0
    2.3314    9.3328   -1.4868 C   0  0  0  0  0  0  0  0  0  0  0  0
    6.3338   -1.3867    1.0862 C   0  0  0  0  0  0  0  0  0  0  0  0
    7.3107   -2.4526    1.6970 C   0  0  0  0  0  0  0  0  0  0  0  0
    7.2263   -0.3574    0.3178 C   0  0  0  0  0  0  0  0  0  0  0  0
    5.4172   -2.1664    0.0826 C   0  0  0  0  0  0  0  0  0  0  0  0
    1.3511    7.8056    2.7252 H   0  0  0  0  0  0  0  0  0  0  0  0
    0.4240    8.1880    1.2643 H   0  0  0  0  0  0  0  0  0  0  0  0
    1.8906    6.6770   -0.0772 H   0  0  0  0  0  0  0  0  0  0  0  0
    3.4406    6.1271    2.5111 H   0  0  0  0  0  0  0  0  0  0  0  0
    1.8948    4.1724    0.7250 H   0  0  0  0  0  0  0  0  0  0  0  0
    0.4145    3.7343    2.6745 H   0  0  0  0  0  0  0  0  0  0  0  0
    1.3401    4.8884    3.6568 H   0  0  0  0  0  0  0  0  0  0  0  0
    4.7095    4.8585    1.2218 H   0  0  0  0  0  0  0  0  0  0  0  0
    3.2881    3.6029    3.2530 H   0  0  0  0  0  0  0  0  0  0  0  0
    3.5516    8.6332    1.6037 H   0  0  0  0  0  0  0  0  0  0  0  0
    4.0485    7.9763    0.0620 H   0  0  0  0  0  0  0  0  0  0  0  0
    1.7717    1.8419    2.7081 H   0  0  0  0  0  0  0  0  0  0  0  0
    2.4319    1.8063    1.0799 H   0  0  0  0  0  0  0  0  0  0  0  0
    4.4084    0.5021    0.6911 H   0  0  0  0  0  0  0  0  0  0  0  0
    6.2766   -1.5170    3.8993 H   0  0  0  0  0  0  0  0  0  0  0  0
    4.8957   -0.3475    5.4276 H   0  0  0  0  0  0  0  0  0  0  0  0
    3.2706    1.2531    4.6619 H   0  0  0  0  0  0  0  0  0  0  0  0
    1.9831   10.5126    1.6465 H   0  0  0  0  0  0  0  0  0  0  0  0
    0.6701   12.1679    0.4892 H   0  0  0  0  0  0  0  0  0  0  0  0
    0.3798   12.0385   -1.9173 H   0  0  0  0  0  0  0  0  0  0  0  0
    1.4692   10.2670   -3.1739 H   0  0  0  0  0  0  0  0  0  0  0  0
    2.7688    8.5847   -2.0304 H   0  0  0  0  0  0  0  0  0  0  0  0
    7.8905   -2.9567    0.9199 H   0  0  0  0  0  0  0  0  0  0  0  0
    8.0213   -1.9830    2.3798 H   0  0  0  0  0  0  0  0  0  0  0  0
    6.7546   -3.2182    2.2420 H   0  0  0  0  0  0  0  0  0  0  0  0
    7.8774   -0.8587   -0.4023 H   0  0  0  0  0  0  0  0  0  0  0  0
    7.8573    0.1927    1.0203 H   0  0  0  0  0  0  0  0  0  0  0  0
    6.6235    0.3653   -0.2334 H   0  0  0  0  0  0  0  0  0  0  0  0
    6.0115   -2.7468   -0.6283 H   0  0  0  0  0  0  0  0  0  0  0  0
    4.7880   -1.4921   -0.4988 H   0  0  0  0  0  0  0  0  0  0  0  0
    4.7667   -2.8584    0.6230 H   0  0  0  0  0  0  0  0  0  0  0  0
  1  2  1  0  0  0  0
  1 29  1  0  0  0  0
  1 30  1  0  0  0  0
  2  3  1  0  0  0  0
  2 11  1  0  0  0  0
  2 31  1  6  0  0  0
  3  4  1  0  0  0  0
  3  9  1  0  0  0  0
  3 32  1  1  0  0  0
  4  5  1  0  0  0  0
  4 10  1  0  0  0  0
  4 33  1  6  0  0  0
  5  6  1  0  0  0  0
  5 34  1  0  0  0  0
  5 35  1  0  0  0  0
  6  1  1  0  0  0  0
  6  7  2  0  0  0  0
  6  8  2  0  0  0  0
  9 36  1  0  0  0  0
 10 12  1  0  0  0  0
 10 37  1  0  0  0  0
 11 19  1  0  0  0  0
 11 38  1  0  0  0  0
 11 39  1  0  0  0  0
 12 13  1  0  0  0  0
 12 40  1  0  0  0  0
 12 41  1  0  0  0  0
 13 14  2  0  0  0  0
 14 15  1  0  0  0  0
 14 42  1  0  0  0  0
 15 16  2  0  0  0  0
 15 25  1  0  0  0  0
 16 17  1  0  0  0  0
 16 43  1  0  0  0  0
 17 18  2  0  0  0  0
 17 44  1  0  0  0  0
 18 13  1  0  0  0  0
 18 45  1  0  0  0  0
 19 20  2  0  0  0  0
 20 21  1  0  0  0  0
 20 46  1  0  0  0  0
 21 22  2  0  0  0  0
 21 47  1  0  0  0  0
 22 23  1  0  0  0  0
 22 48  1  0  0  0  0
 23 24  2  0  0  0  0
 23 49  1  0  0  0  0
 24 19  1  0  0  0  0
 24 50  1  0  0  0  0
 25 26  1  0  0  0  0
 25 27  1  0  0  0  0
 25 28  1  0  0  0  0
 26 51  1  0  0  0  0
 26 52  1  0  0  0  0
 26 53  1  0  0  0  0
 27 54  1  0  0  0  0
 27 55  1  0  0  0  0
 27 56  1  0  0  0  0
 28 57  1  0  0  0  0
 28 58  1  0  0  0  0
 28 59  1  0  0  0  0
M  END
$$$$
Dataset (23)
 OpenBabel02101614293D

 61 63  0  0  0  0  0  0  0  0999 V2000
    0.7822    6.9348    1.1266 C   0  0  0  0  0  0  0  0  0  0  0  0
    2.1129    6.5313    0.4160 C   0  0  2  0  0  0  0  0  0  0  0  0
    3.0399    5.6755    1.3614 C   0  0  1  0  0  0  0  0  0  0  0  0
    2.4331    4.3135    1.8523 C   0  0  2  0  0  0  0  0  0  0  0  0
    1.1407    4.5076    2.6948 C   0  0  0  0  0  0  0  0  0  0  0  0
   -0.0973    5.4721    1.7658 S   0  0  0  0  0  0  0  0  0  0  0  0
   -1.2978    5.9162    2.7306 O   0  0  0  0  0  0  0  0  0  0  0  0
   -0.6596    4.5963    0.5465 O   0  0  0  0  0  0  0  0  0  0  0  0
    4.2598    5.3838    0.6753 O   0  0  0  0  0  0  0  0  0  0  0  0
    3.4532    3.5664    2.6511 N   0  0  0  0  0  0  0  0  0  0  0  0
    2.8456    7.8112   -0.1267 C   0  0  0  0  0  0  0  0  0  0  0  0
    3.1791    2.1291    2.9104 C   0  0  0  0  0  0  0  0  0  0  0  0
    4.3049    1.4968    3.6449 C   0  0  0  0  0  0  0  0  0  0  0  0
    5.2800    0.7304    2.9659 C   0  0  0  0  0  0  0  0  0  0  0  0
    6.3461    0.0725    3.6418 C   0  0  0  0  0  0  0  0  0  0  0  0
    6.4020    0.2354    5.0526 C   0  0  0  0  0  0  0  0  0  0  0  0
    5.4502    1.0025    5.7436 C   0  0  0  0  0  0  0  0  0  0  0  0
    4.4075    1.6301    5.0467 C   0  0  0  0  0  0  0  0  0  0  0  0
    2.0393    8.5919   -1.1147 C   0  0  0  0  0  0  0  0  0  0  0  0
    2.0129    8.2268   -2.4818 C   0  0  0  0  0  0  0  0  0  0  0  0
    1.1807    8.9009   -3.3950 C   0  0  0  0  0  0  0  0  0  0  0  0
    0.3549    9.9558   -2.9581 C   0  0  0  0  0  0  0  0  0  0  0  0
    0.4028   10.3625   -1.6083 C   0  0  0  0  0  0  0  0  0  0  0  0
    1.2449    9.6893   -0.7019 C   0  0  0  0  0  0  0  0  0  0  0  0
    7.3507   -0.7530    2.8530 C   0  0  0  0  0  0  0  0  0  0  0  0
    8.4390   -1.4625    3.7364 C   0  0  0  0  0  0  0  0  0  0  0  0
    8.1136    0.1850    1.8573 C   0  0  0  0  0  0  0  0  0  0  0  0
    6.6066   -1.8877    2.0657 C   0  0  0  0  0  0  0  0  0  0  0  0
   -0.4806   10.5536   -3.8347 N   0  0  0  0  0  0  0  0  0  0  0  0
   -0.3402   11.3488   -1.1767 F   0  0  0  0  0  0  0  0  0  0  0  0
    0.9928    7.6023    1.9641 H   0  0  0  0  0  0  0  0  0  0  0  0
    0.0940    7.4327    0.4437 H   0  0  0  0  0  0  0  0  0  0  0  0
    1.8581    5.9071   -0.4473 H   0  0  0  0  0  0  0  0  0  0  0  0
    3.2992    6.2796    2.2347 H   0  0  0  0  0  0  0  0  0  0  0  0
    2.1875    3.7244    0.9620 H   0  0  0  0  0  0  0  0  0  0  0  0
    0.6833    3.5511    2.9443 H   0  0  0  0  0  0  0  0  0  0  0  0
    1.3771    5.0394    3.6174 H   0  0  0  0  0  0  0  0  0  0  0  0
    4.8482    4.9873    1.3518 H   0  0  0  0  0  0  0  0  0  0  0  0
    3.5473    4.0379    3.5538 H   0  0  0  0  0  0  0  0  0  0  0  0
    3.1202    8.4507    0.7185 H   0  0  0  0  0  0  0  0  0  0  0  0
    3.7848    7.5253   -0.6092 H   0  0  0  0  0  0  0  0  0  0  0  0
    2.2726    2.0073    3.5069 H   0  0  0  0  0  0  0  0  0  0  0  0
    3.0091    1.6178    1.9582 H   0  0  0  0  0  0  0  0  0  0  0  0
    5.1984    0.6510    1.9496 H   0  0  0  0  0  0  0  0  0  0  0  0
    7.1344   -0.2000    5.6127 H   0  0  0  0  0  0  0  0  0  0  0  0
    5.5133    1.0965    6.7596 H   0  0  0  0  0  0  0  0  0  0  0  0
    3.7184    2.1727    5.5738 H   0  0  0  0  0  0  0  0  0  0  0  0
    2.5917    7.4564   -2.8221 H   0  0  0  0  0  0  0  0  0  0  0  0
    1.1730    8.6094   -4.3767 H   0  0  0  0  0  0  0  0  0  0  0  0
    1.2524    9.9905    0.2743 H   0  0  0  0  0  0  0  0  0  0  0  0
    9.1337   -2.0447    3.1256 H   0  0  0  0  0  0  0  0  0  0  0  0
    9.0292   -0.7289    4.2917 H   0  0  0  0  0  0  0  0  0  0  0  0
    7.9735   -2.1489    4.4492 H   0  0  0  0  0  0  0  0  0  0  0  0
    8.8745   -0.3700    1.3040 H   0  0  0  0  0  0  0  0  0  0  0  0
    8.6108    0.9921    2.4013 H   0  0  0  0  0  0  0  0  0  0  0  0
    7.4418    0.6375    1.1248 H   0  0  0  0  0  0  0  0  0  0  0  0
    7.3163   -2.5265    1.5344 H   0  0  0  0  0  0  0  0  0  0  0  0
    5.9154   -1.4872    1.3214 H   0  0  0  0  0  0  0  0  0  0  0  0
    6.0344   -2.5165    2.7525 H   0  0  0  0  0  0  0  0  0  0  0  0
   -0.4985   10.2724   -4.7635 H   0  0  0  0  0  0  0  0  0  0  0  0
   -1.0773   11.2604   -3.5409 H   0  0  0  0  0  0  0  0  0  0  0  0
  1  2  1  0  0  0  0
  1 31  1  0  0  0  0
  1 32  1  0  0  0  0
  2  3  1  0  0  0  0
  2 11  1  0  0  0  0
  2 33  1  6  0  0  0
  3  4  1  0  0  0  0
  3  9  1  0  0  0  0
  3 34  1  1  0  0  0
  4  5  1  0  0  0  0
  4 10  1  0  0  0  0
  4 35  1  6  0  0  0
  5  6  1  0  0  0  0
  5 36  1  0  0  0  0
  5 37  1  0  0  0  0
  6  1  1  0  0  0  0
  6  7  2  0  0  0  0
  6  8  2  0  0  0  0
  9 38  1  0  0  0  0
 10 12  1  0  0  0  0
 10 39  1  0  0  0  0
 11 19  1  0  0  0  0
 11 40  1  0  0  0  0
 11 41  1  0  0  0  0
 12 13  1  0  0  0  0
 12 42  1  0  0  0  0
 12 43  1  0  0  0  0
 13 14  2  0  0  0  0
 14 15  1  0  0  0  0
 14 44  1  0  0  0  0
 15 16  2  0  0  0  0
 15 25  1  0  0  0  0
 16 17  1  0  0  0  0
 16 45  1  0  0  0  0
 17 18  2  0  0  0  0
 17 46  1  0  0  0  0
 18 13  1  0  0  0  0
 18 47  1  0  0  0  0
 19 20  2  0  0  0  0
 20 21  1  0  0  0  0
 20 48  1  0  0  0  0
 21 22  2  0  0  0  0
 21 49  1  0  0  0  0
 22 23  1  0  0  0  0
 22 29  1  0  0  0  0
 23 24  2  0  0  0  0
 23 30  1  0  0  0  0
 24 19  1  0  0  0  0
 24 50  1  0  0  0  0
 25 26  1  0  0  0  0
 25 27  1  0  0  0  0
 25 28  1  0  0  0  0
 26 51  1  0  0  0  0
 26 52  1  0  0  0  0
 26 53  1  0  0  0  0
 27 54  1  0  0  0  0
 27 55  1  0  0  0  0
 27 56  1  0  0  0  0
 28 57  1  0  0  0  0
 28 58  1  0  0  0  0
 28 59  1  0  0  0  0
 29 60  1  0  0  0  0
 29 61  1  0  0  0  0
M  END
$$$$
Dataset (24)
 OpenBabel02101614293D

 61 63  0  0  0  0  0  0  0  0999 V2000
    0.7780    6.9350    1.1217 C   0  0  0  0  0  0  0  0  0  0  0  0
    2.1123    6.5347    0.4163 C   0  0  2  0  0  0  0  0  0  0  0  0
    3.0388    5.6795    1.3624 C   0  0  1  0  0  0  0  0  0  0  0  0
    2.4307    4.3171    1.8543 C   0  0  2  0  0  0  0  0  0  0  0  0
    1.1356    4.5093    2.6930 C   0  0  0  0  0  0  0  0  0  0  0  0
   -0.1006    5.4690    1.7581 S   0  0  0  0  0  0  0  0  0  0  0  0
   -1.3048    5.9153    2.7161 O   0  0  0  0  0  0  0  0  0  0  0  0
   -0.6610    4.5967    0.5362 O   0  0  0  0  0  0  0  0  0  0  0  0
    4.2589    5.3860    0.6788 O   0  0  0  0  0  0  0  0  0  0  0  0
    3.4505    3.5734    2.6572 N   0  0  0  0  0  0  0  0  0  0  0  0
    2.8435    7.8145   -0.1252 C   0  0  0  0  0  0  0  0  0  0  0  0
    3.1841    2.1328    2.9093 C   0  0  0  0  0  0  0  0  0  0  0  0
    4.3088    1.4996    3.6446 C   0  0  0  0  0  0  0  0  0  0  0  0
    5.2856    0.7332    2.9682 C   0  0  0  0  0  0  0  0  0  0  0  0
    6.3539    0.0780    3.6430 C   0  0  0  0  0  0  0  0  0  0  0  0
    6.4089    0.2427    5.0535 C   0  0  0  0  0  0  0  0  0  0  0  0
    5.4542    1.0047    5.7440 C   0  0  0  0  0  0  0  0  0  0  0  0
    4.4105    1.6296    5.0463 C   0  0  0  0  0  0  0  0  0  0  0  0
    2.0392    8.5945   -1.1151 C   0  0  0  0  0  0  0  0  0  0  0  0
    1.2338    9.6821   -0.7036 C   0  0  0  0  0  0  0  0  0  0  0  0
    0.3901   10.3512   -1.6101 C   0  0  0  0  0  0  0  0  0  0  0  0
    0.3564    9.9564   -2.9652 C   0  0  0  0  0  0  0  0  0  0  0  0
    1.1932    8.9058   -3.4003 C   0  0  0  0  0  0  0  0  0  0  0  0
    2.0223    8.2333   -2.4813 C   0  0  0  0  0  0  0  0  0  0  0  0
    7.3641   -0.7463    2.8571 C   0  0  0  0  0  0  0  0  0  0  0  0
    8.4507   -1.4522    3.7436 C   0  0  0  0  0  0  0  0  0  0  0  0
    8.1281    0.1932    1.8640 C   0  0  0  0  0  0  0  0  0  0  0  0
    6.6260   -1.8836    2.0683 C   0  0  0  0  0  0  0  0  0  0  0  0
   -0.6827   11.7343   -0.9671 Br  0  0  0  0  0  0  0  0  0  0  0  0
   -0.4878   10.5540   -3.8353 N   0  0  0  0  0  0  0  0  0  0  0  0
    1.2071    8.5320   -4.6532 F   0  0  0  0  0  0  0  0  0  0  0  0
    0.9837    7.6038    1.9609 H   0  0  0  0  0  0  0  0  0  0  0  0
    0.0929    7.4349    0.4357 H   0  0  0  0  0  0  0  0  0  0  0  0
    1.8585    5.9107   -0.4474 H   0  0  0  0  0  0  0  0  0  0  0  0
    3.2967    6.2846    2.2356 H   0  0  0  0  0  0  0  0  0  0  0  0
    2.1900    3.7258    0.9634 H   0  0  0  0  0  0  0  0  0  0  0  0
    0.6802    3.5515    2.9401 H   0  0  0  0  0  0  0  0  0  0  0  0
    1.3682    5.0419    3.6163 H   0  0  0  0  0  0  0  0  0  0  0  0
    4.8446    4.9860    1.3550 H   0  0  0  0  0  0  0  0  0  0  0  0
    3.5323    4.0425    3.5630 H   0  0  0  0  0  0  0  0  0  0  0  0
    3.1164    8.4534    0.7197 H   0  0  0  0  0  0  0  0  0  0  0  0
    3.7840    7.5282   -0.6025 H   0  0  0  0  0  0  0  0  0  0  0  0
    2.2779    2.0030    3.5035 H   0  0  0  0  0  0  0  0  0  0  0  0
    3.0192    1.6253    1.9556 H   0  0  0  0  0  0  0  0  0  0  0  0
    5.2086    0.6534    1.9520 H   0  0  0  0  0  0  0  0  0  0  0  0
    7.1421   -0.1886    5.6158 H   0  0  0  0  0  0  0  0  0  0  0  0
    5.5182    1.0986    6.7600 H   0  0  0  0  0  0  0  0  0  0  0  0
    3.7207    2.1723    5.5724 H   0  0  0  0  0  0  0  0  0  0  0  0
    1.2329    9.9737    0.2757 H   0  0  0  0  0  0  0  0  0  0  0  0
    2.6080    7.4628   -2.8120 H   0  0  0  0  0  0  0  0  0  0  0  0
    9.1482   -2.0334    3.1349 H   0  0  0  0  0  0  0  0  0  0  0  0
    9.0386   -0.7184    4.2986 H   0  0  0  0  0  0  0  0  0  0  0  0
    7.9856   -2.1392    4.4540 H   0  0  0  0  0  0  0  0  0  0  0  0
    8.8915   -0.3583    1.3105 H   0  0  0  0  0  0  0  0  0  0  0  0
    8.6231    1.0005    2.4097 H   0  0  0  0  0  0  0  0  0  0  0  0
    7.4566    0.6449    1.1319 H   0  0  0  0  0  0  0  0  0  0  0  0
    7.3376   -2.5216    1.5385 H   0  0  0  0  0  0  0  0  0  0  0  0
    5.9361   -1.4848    1.3229 H   0  0  0  0  0  0  0  0  0  0  0  0
    6.0539   -2.5140    2.7537 H   0  0  0  0  0  0  0  0  0  0  0  0
   -0.5064   10.2790   -4.7651 H   0  0  0  0  0  0  0  0  0  0  0  0
   -1.0854   11.2566   -3.5365 H   0  0  0  0  0  0  0  0  0  0  0  0
  1  2  1  0  0  0  0
  1 32  1  0  0  0  0
  1 33  1  0  0  0  0
  2  3  1  0  0  0  0
  2 11  1  0  0  0  0
  2 34  1  6  0  0  0
  3  4  1  0  0  0  0
  3  9  1  0  0  0  0
  3 35  1  1  0  0  0
  4  5  1  0  0  0  0
  4 10  1  0  0  0  0
  4 36  1  6  0  0  0
  5  6  1  0  0  0  0
  5 37  1  0  0  0  0
  5 38  1  0  0  0  0
  6  1  1  0  0  0  0
  6  7  2  0  0  0  0
  6  8  2  0  0  0  0
  9 39  1  0  0  0  0
 10 12  1  0  0  0  0
 10 40  1  0  0  0  0
 11 19  1  0  0  0  0
 11 41  1  0  0  0  0
 11 42  1  0  0  0  0
 12 13  1  0  0  0  0
 12 43  1  0  0  0  0
 12 44  1  0  0  0  0
 13 14  2  0  0  0  0
 14 15  1  0  0  0  0
 14 45  1  0  0  0  0
 15 16  2  0  0  0  0
 15 25  1  0  0  0  0
 16 17  1  0  0  0  0
 16 46  1  0  0  0  0
 17 18  2  0  0  0  0
 17 47  1  0  0  0  0
 18 13  1  0  0  0  0
 18 48  1  0  0  0  0
 19 20  2  0  0  0  0
 20 21  1  0  0  0  0
 20 49  1  0  0  0  0
 21 22  2  0  0  0  0
 21 29  1  0  0  0  0
 22 23  1  0  0  0  0
 22 30  1  0  0  0  0
 23 24  2  0  0  0  0
 23 31  1  0  0  0  0
 24 19  1  0  0  0  0
 24 50  1  0  0  0  0
 25 26  1  0  0  0  0
 25 27  1  0  0  0  0
 25 28  1  0  0  0  0
 26 51  1  0  0  0  0
 26 52  1  0  0  0  0
 26 53  1  0  0  0  0
 27 54  1  0  0  0  0
 27 55  1  0  0  0  0
 27 56  1  0  0  0  0
 28 57  1  0  0  0  0
 28 58  1  0  0  0  0
 28 59  1  0  0  0  0
 30 60  1  0  0  0  0
 30 61  1  0  0  0  0
M  END
$$$$
Dataset (25)
 OpenBabel02101614293D

 61 63  0  0  0  0  0  0  0  0999 V2000
    0.7900    6.9384    1.1204 C   0  0  0  0  0  0  0  0  0  0  0  0
    2.1206    6.5321    0.4139 C   0  0  2  0  0  0  0  0  0  0  0  0
    3.0419    5.6705    1.3612 C   0  0  1  0  0  0  0  0  0  0  0  0
    2.4305    4.3077    1.8507 C   0  0  2  0  0  0  0  0  0  0  0  0
    1.1398    4.5072    2.6922 C   0  0  0  0  0  0  0  0  0  0  0  0
   -0.0929    5.4760    1.7586 S   0  0  0  0  0  0  0  0  0  0  0  0
   -1.2956    5.9311    2.7159 O   0  0  0  0  0  0  0  0  0  0  0  0
   -0.6573    4.6074    0.5344 O   0  0  0  0  0  0  0  0  0  0  0  0
    4.2672    5.3830    0.6838 O   0  0  0  0  0  0  0  0  0  0  0  0
    3.4453    3.5558    2.6487 N   0  0  0  0  0  0  0  0  0  0  0  0
    2.8474    7.8171   -0.1288 C   0  0  0  0  0  0  0  0  0  0  0  0
    3.1790    2.1180    2.9137 C   0  0  0  0  0  0  0  0  0  0  0  0
    4.3087    1.4946    3.6524 C   0  0  0  0  0  0  0  0  0  0  0  0
    5.2882    0.7337    2.9746 C   0  0  0  0  0  0  0  0  0  0  0  0
    6.3541    0.0755    3.6511 C   0  0  0  0  0  0  0  0  0  0  0  0
    6.4079    0.2356    5.0631 C   0  0  0  0  0  0  0  0  0  0  0  0
    5.4565    1.0032    5.7543 C   0  0  0  0  0  0  0  0  0  0  0  0
    4.4134    1.6283    5.0538 C   0  0  0  0  0  0  0  0  0  0  0  0
    2.0356    8.5991   -1.1163 C   0  0  0  0  0  0  0  0  0  0  0  0
    1.2284    9.6884   -0.7034 C   0  0  0  0  0  0  0  0  0  0  0  0
    0.3750   10.3522   -1.6059 C   0  0  0  0  0  0  0  0  0  0  0  0
    0.3431    9.9550   -2.9600 C   0  0  0  0  0  0  0  0  0  0  0  0
    1.1883    8.9163   -3.3993 C   0  0  0  0  0  0  0  0  0  0  0  0
    2.0195    8.2416   -2.4853 C   0  0  0  0  0  0  0  0  0  0  0  0
    7.3634   -0.7463    2.8621 C   0  0  0  0  0  0  0  0  0  0  0  0
    8.4556   -1.4593    3.7378 C   0  0  0  0  0  0  0  0  0  0  0  0
    8.1238    0.1948    1.8672 C   0  0  0  0  0  0  0  0  0  0  0  0
    6.6160   -1.8769    2.0739 C   0  0  0  0  0  0  0  0  0  0  0  0
   -0.7189   11.7198   -0.9638 Br  0  0  0  0  0  0  0  0  0  0  0  0
   -0.4939   10.5460   -3.8408 N   0  0  0  0  0  0  0  0  0  0  0  0
    1.0019    7.6064    1.9576 H   0  0  0  0  0  0  0  0  0  0  0  0
    0.1099    7.4413    0.4329 H   0  0  0  0  0  0  0  0  0  0  0  0
    1.8670    5.9109   -0.4527 H   0  0  0  0  0  0  0  0  0  0  0  0
    3.2979    6.2736    2.2362 H   0  0  0  0  0  0  0  0  0  0  0  0
    2.1794    3.7196    0.9626 H   0  0  0  0  0  0  0  0  0  0  0  0
    0.6787    3.5538    2.9468 H   0  0  0  0  0  0  0  0  0  0  0  0
    1.3785    5.0375    3.6149 H   0  0  0  0  0  0  0  0  0  0  0  0
    4.8566    4.9988    1.3665 H   0  0  0  0  0  0  0  0  0  0  0  0
    3.5474    4.0281    3.5493 H   0  0  0  0  0  0  0  0  0  0  0  0
    3.1185    8.4593    0.7158 H   0  0  0  0  0  0  0  0  0  0  0  0
    3.7893    7.5356   -0.6104 H   0  0  0  0  0  0  0  0  0  0  0  0
    2.2713    1.9950    3.5063 H   0  0  0  0  0  0  0  0  0  0  0  0
    3.0134    1.5989    1.9659 H   0  0  0  0  0  0  0  0  0  0  0  0
    5.2120    0.6590    1.9570 H   0  0  0  0  0  0  0  0  0  0  0  0
    7.1385   -0.2009    5.6255 H   0  0  0  0  0  0  0  0  0  0  0  0
    5.5221    1.1024    6.7710 H   0  0  0  0  0  0  0  0  0  0  0  0
    3.7250    2.1733    5.5786 H   0  0  0  0  0  0  0  0  0  0  0  0
    1.2366    9.9879    0.2734 H   0  0  0  0  0  0  0  0  0  0  0  0
    1.1885    8.6341   -4.3831 H   0  0  0  0  0  0  0  0  0  0  0  0
    2.6069    7.4790   -2.8289 H   0  0  0  0  0  0  0  0  0  0  0  0
    9.1485   -2.0370    3.1172 H   0  0  0  0  0  0  0  0  0  0  0  0
    9.0470   -0.7271    4.2953 H   0  0  0  0  0  0  0  0  0  0  0  0
    7.9919   -2.1509    4.4476 H   0  0  0  0  0  0  0  0  0  0  0  0
    8.8885   -0.3550    1.3123 H   0  0  0  0  0  0  0  0  0  0  0  0
    8.6157    1.0059    2.4122 H   0  0  0  0  0  0  0  0  0  0  0  0
    7.4478    0.6404    1.1349 H   0  0  0  0  0  0  0  0  0  0  0  0
    7.3209   -2.5182    1.5385 H   0  0  0  0  0  0  0  0  0  0  0  0
    5.9274   -1.4684    1.3323 H   0  0  0  0  0  0  0  0  0  0  0  0
    6.0405   -2.5028    2.7621 H   0  0  0  0  0  0  0  0  0  0  0  0
   -0.4981   10.2688   -4.7700 H   0  0  0  0  0  0  0  0  0  0  0  0
   -1.0960   11.2504   -3.5526 H   0  0  0  0  0  0  0  0  0  0  0  0
  1  2  1  0  0  0  0
  1 31  1  0  0  0  0
  1 32  1  0  0  0  0
  2  3  1  0  0  0  0
  2 11  1  0  0  0  0
  2 33  1  6  0  0  0
  3  4  1  0  0  0  0
  3  9  1  0  0  0  0
  3 34  1  1  0  0  0
  4  5  1  0  0  0  0
  4 10  1  0  0  0  0
  4 35  1  6  0  0  0
  5  6  1  0  0  0  0
  5 36  1  0  0  0  0
  5 37  1  0  0  0  0
  6  1  1  0  0  0  0
  6  7  2  0  0  0  0
  6  8  2  0  0  0  0
  9 38  1  0  0  0  0
 10 12  1  0  0  0  0
 10 39  1  0  0  0  0
 11 19  1  0  0  0  0
 11 40  1  0  0  0  0
 11 41  1  0  0  0  0
 12 13  1  0  0  0  0
 12 42  1  0  0  0  0
 12 43  1  0  0  0  0
 13 14  2  0  0  0  0
 14 15  1  0  0  0  0
 14 44  1  0  0  0  0
 15 16  2  0  0  0  0
 15 25  1  0  0  0  0
 16 17  1  0  0  0  0
 16 45  1  0  0  0  0
 17 18  2  0  0  0  0
 17 46  1  0  0  0  0
 18 13  1  0  0  0  0
 18 47  1  0  0  0  0
 19 20  2  0  0  0  0
 20 21  1  0  0  0  0
 20 48  1  0  0  0  0
 21 22  2  0  0  0  0
 21 29  1  0  0  0  0
 22 23  1  0  0  0  0
 22 30  1  0  0  0  0
 23 24  2  0  0  0  0
 23 49  1  0  0  0  0
 24 19  1  0  0  0  0
 24 50  1  0  0  0  0
 25 26  1  0  0  0  0
 25 27  1  0  0  0  0
 25 28  1  0  0  0  0
 26 51  1  0  0  0  0
 26 52  1  0  0  0  0
 26 53  1  0  0  0  0
 27 54  1  0  0  0  0
 27 55  1  0  0  0  0
 27 56  1  0  0  0  0
 28 57  1  0  0  0  0
 28 58  1  0  0  0  0
 28 59  1  0  0  0  0
 30 60  1  0  0  0  0
 30 61  1  0  0  0  0
M  END
$$$$
Dataset (26)
 OpenBabel02101614293D

 55 57  0  0  0  0  0  0  0  0999 V2000
    2.4505    3.7015    5.2563 C   0  0  0  0  0  0  0  0  0  0  0  0
    3.6865    3.5271    4.3190 C   0  0  2  0  0  0  0  0  0  0  0  0
    4.2976    2.0756    4.4286 C   0  0  1  0  0  0  0  0  0  0  0  0
    3.3360    0.9008    4.0236 C   0  0  2  0  0  0  0  0  0  0  0  0
    2.0761    0.8292    4.9321 C   0  0  0  0  0  0  0  0  0  0  0  0
    1.1907    2.4242    4.9340 S   0  0  0  0  0  0  0  0  0  0  0  0
    0.0724    2.4487    6.0818 O   0  0  0  0  0  0  0  0  0  0  0  0
    0.5211    2.6784    3.5000 O   0  0  0  0  0  0  0  0  0  0  0  0
    5.4604    1.9927    3.6000 O   0  0  0  0  0  0  0  0  0  0  0  0
    4.0717   -0.4019    4.0686 N   0  0  0  0  0  0  0  0  0  0  0  0
    4.7494    4.6435    4.6210 C   0  0  0  0  0  0  0  0  0  0  0  0
    3.4269   -1.5634    3.3994 C   0  0  0  0  0  0  0  0  0  0  0  0
    4.2965   -2.7707    3.4413 C   0  0  0  0  0  0  0  0  0  0  0  0
    5.0875   -3.1488    2.3282 C   0  0  0  0  0  0  0  0  0  0  0  0
    5.8892   -4.3202    2.3415 C   0  0  0  0  0  0  0  0  0  0  0  0
    5.8904   -5.1086    3.5183 C   0  0  0  0  0  0  0  0  0  0  0  0
    5.1136   -4.7472    4.6321 C   0  0  0  0  0  0  0  0  0  0  0  0
    4.3275   -3.5836    4.5973 C   0  0  0  0  0  0  0  0  0  0  0  0
    4.2355    6.0342    4.4180 C   0  0  0  0  0  0  0  0  0  0  0  0
    3.7043    6.7806    5.4964 C   0  0  0  0  0  0  0  0  0  0  0  0
    3.1296    8.0502    5.2930 C   0  0  0  0  0  0  0  0  0  0  0  0
    3.0991    8.6112    3.9971 C   0  0  0  0  0  0  0  0  0  0  0  0
    3.6801    7.9019    2.9232 C   0  0  0  0  0  0  0  0  0  0  0  0
    4.2356    6.6247    3.1337 C   0  0  0  0  0  0  0  0  0  0  0  0
    6.7457   -4.6898    1.1674 C   0  0  0  0  0  0  0  0  0  0  0  0
    6.9179   -6.0536    1.0604 F   0  0  0  0  0  0  0  0  0  0  0  0
    6.1588   -4.3275   -0.0263 F   0  0  0  0  0  0  0  0  0  0  0  0
    8.1381   -4.0227    1.2744 C   0  0  0  0  0  0  0  0  0  0  0  0
    2.3959    8.9331    6.7622 Br  0  0  0  0  0  0  0  0  0  0  0  0
    2.5116    9.8091    3.7816 N   0  0  0  0  0  0  0  0  0  0  0  0
    3.6978    8.4055    1.7165 F   0  0  0  0  0  0  0  0  0  0  0  0
    2.7574    3.6264    6.3022 H   0  0  0  0  0  0  0  0  0  0  0  0
    1.9643    4.6654    5.1027 H   0  0  0  0  0  0  0  0  0  0  0  0
    3.3460    3.6637    3.2862 H   0  0  0  0  0  0  0  0  0  0  0  0
    4.6326    1.9182    5.4583 H   0  0  0  0  0  0  0  0  0  0  0  0
    3.0144    1.0835    2.9932 H   0  0  0  0  0  0  0  0  0  0  0  0
    1.3762    0.0730    4.5797 H   0  0  0  0  0  0  0  0  0  0  0  0
    2.3702    0.5869    5.9549 H   0  0  0  0  0  0  0  0  0  0  0  0
    5.8758    1.1302    3.8193 H   0  0  0  0  0  0  0  0  0  0  0  0
    4.2132   -0.6410    5.0536 H   0  0  0  0  0  0  0  0  0  0  0  0
    5.1081    4.5252    5.6496 H   0  0  0  0  0  0  0  0  0  0  0  0
    5.6213    4.5058    3.9736 H   0  0  0  0  0  0  0  0  0  0  0  0
    2.4799   -1.8055    3.8847 H   0  0  0  0  0  0  0  0  0  0  0  0
    3.1968   -1.3001    2.3637 H   0  0  0  0  0  0  0  0  0  0  0  0
    5.0776   -2.5554    1.4938 H   0  0  0  0  0  0  0  0  0  0  0  0
    6.4636   -5.9535    3.5818 H   0  0  0  0  0  0  0  0  0  0  0  0
    5.1196   -5.3336    5.4698 H   0  0  0  0  0  0  0  0  0  0  0  0
    3.7683   -3.3403    5.4203 H   0  0  0  0  0  0  0  0  0  0  0  0
    3.7075    6.3882    6.4405 H   0  0  0  0  0  0  0  0  0  0  0  0
    4.6357    6.1199    2.3387 H   0  0  0  0  0  0  0  0  0  0  0  0
    8.7474   -4.2797    0.4040 H   0  0  0  0  0  0  0  0  0  0  0  0
    8.6581   -4.3662    2.1729 H   0  0  0  0  0  0  0  0  0  0  0  0
    8.0383   -2.9353    1.3193 H   0  0  0  0  0  0  0  0  0  0  0  0
    2.4971   10.1914    2.8899 H   0  0  0  0  0  0  0  0  0  0  0  0
    2.0909   10.2880    4.5129 H   0  0  0  0  0  0  0  0  0  0  0  0
  1  2  1  0  0  0  0
  1 32  1  0  0  0  0
  1 33  1  0  0  0  0
  2  3  1  0  0  0  0
  2 11  1  0  0  0  0
  2 34  1  6  0  0  0
  3  4  1  0  0  0  0
  3  9  1  0  0  0  0
  3 35  1  1  0  0  0
  4  5  1  0  0  0  0
  4 10  1  0  0  0  0
  4 36  1  6  0  0  0
  5  6  1  0  0  0  0
  5 37  1  0  0  0  0
  5 38  1  0  0  0  0
  6  1  1  0  0  0  0
  6  7  2  0  0  0  0
  6  8  2  0  0  0  0
  9 39  1  0  0  0  0
 10 12  1  0  0  0  0
 10 40  1  0  0  0  0
 11 19  1  0  0  0  0
 11 41  1  0  0  0  0
 11 42  1  0  0  0  0
 12 13  1  0  0  0  0
 12 43  1  0  0  0  0
 12 44  1  0  0  0  0
 13 14  2  0  0  0  0
 14 15  1  0  0  0  0
 14 45  1  0  0  0  0
 15 16  2  0  0  0  0
 15 25  1  0  0  0  0
 16 17  1  0  0  0  0
 16 46  1  0  0  0  0
 17 18  2  0  0  0  0
 17 47  1  0  0  0  0
 18 13  1  0  0  0  0
 18 48  1  0  0  0  0
 19 20  2  0  0  0  0
 20 21  1  0  0  0  0
 20 49  1  0  0  0  0
 21 22  2  0  0  0  0
 21 29  1  0  0  0  0
 22 23  1  0  0  0  0
 22 30  1  0  0  0  0
 23 24  2  0  0  0  0
 23 31  1  0  0  0  0
 24 19  1  0  0  0  0
 24 50  1  0  0  0  0
 25 26  1  0  0  0  0
 25 27  1  0  0  0  0
 25 28  1  0  0  0  0
 28 51  1  0  0  0  0
 28 52  1  0  0  0  0
 28 53  1  0  0  0  0
 30 54  1  0  0  0  0
 30 55  1  0  0  0  0
M  END
$$$$
Dataset (27)
 OpenBabel02101614293D

 65 67  0  0  0  0  0  0  0  0999 V2000
    0.6316    6.7478    0.8349 C   0  0  0  0  0  0  0  0  0  0  0  0
    0.6344    5.7733   -0.3855 C   0  0  2  0  0  0  0  0  0  0  0  0
    1.5369    4.5070   -0.1202 C   0  0  1  0  0  0  0  0  0  0  0  0
    1.1077    3.6158    1.0991 C   0  0  2  0  0  0  0  0  0  0  0  0
    1.1565    4.3833    2.4515 C   0  0  0  0  0  0  0  0  0  0  0  0
    0.1399    5.8966    2.3717 S   0  0  0  0  0  0  0  0  0  0  0  0
    0.4318    6.8285    3.6437 O   0  0  0  0  0  0  0  0  0  0  0  0
   -1.4150    5.5077    2.3130 O   0  0  0  0  0  0  0  0  0  0  0  0
    1.5287    3.6755   -1.2840 O   0  0  0  0  0  0  0  0  0  0  0  0
    1.9867    2.4096    1.1688 N   0  0  0  0  0  0  0  0  0  0  0  0
    1.0445    6.5391   -1.6935 C   0  0  0  0  0  0  0  0  0  0  0  0
    1.5162    1.2888    2.0244 C   0  0  0  0  0  0  0  0  0  0  0  0
    2.4340    0.1248    1.9293 C   0  0  0  0  0  0  0  0  0  0  0  0
    2.1313   -0.9834    1.1045 C   0  0  0  0  0  0  0  0  0  0  0  0
    2.9674   -2.1317    1.0189 C   0  0  0  0  0  0  0  0  0  0  0  0
    4.1540   -2.1112    1.8019 C   0  0  0  0  0  0  0  0  0  0  0  0
    4.4761   -1.0186    2.6241 C   0  0  0  0  0  0  0  0  0  0  0  0
    3.6230    0.0932    2.6877 C   0  0  0  0  0  0  0  0  0  0  0  0
    0.1115    7.6540   -2.0485 C   0  0  0  0  0  0  0  0  0  0  0  0
    0.3648    8.9601   -1.5709 C   0  0  0  0  0  0  0  0  0  0  0  0
   -0.5689   10.0027   -1.7346 C   0  0  0  0  0  0  0  0  0  0  0  0
   -1.7432    9.8143   -2.5007 C   0  0  0  0  0  0  0  0  0  0  0  0
   -1.9730    8.4921   -3.0265 C   0  0  0  0  0  0  0  0  0  0  0  0
   -1.0616    7.3980   -2.7961 C   0  0  0  0  0  0  0  0  0  0  0  0
    2.5749   -3.2972    0.1208 C   0  0  0  0  0  0  0  0  0  0  0  0
    3.5657   -4.5137    0.1715 C   0  0  0  0  0  0  0  0  0  0  0  0
    2.5356   -2.8091   -1.3672 C   0  0  0  0  0  0  0  0  0  0  0  0
    1.1703   -3.8533    0.5447 C   0  0  0  0  0  0  0  0  0  0  0  0
   -2.5784   10.9332   -2.6560 N   0  0  0  0  0  0  0  0  0  0  0  0
   -0.3106   11.2041   -1.1199 O   0  0  0  0  0  0  0  0  0  0  0  0
   -0.7835   11.2796    0.2456 C   0  0  0  0  0  0  0  0  0  0  0  0
   -0.1743   10.3685    1.0776 F   0  0  0  0  0  0  0  0  0  0  0  0
   -2.1484   11.1369    0.3493 F   0  0  0  0  0  0  0  0  0  0  0  0
   -0.4692   12.5273    0.7173 F   0  0  0  0  0  0  0  0  0  0  0  0
    1.6278    7.1728    0.9796 H   0  0  0  0  0  0  0  0  0  0  0  0
   -0.0829    7.5589    0.6989 H   0  0  0  0  0  0  0  0  0  0  0  0
   -0.3905    5.4148   -0.5284 H   0  0  0  0  0  0  0  0  0  0  0  0
    2.5682    4.8378    0.0296 H   0  0  0  0  0  0  0  0  0  0  0  0
    0.0776    3.2879    0.9176 H   0  0  0  0  0  0  0  0  0  0  0  0
    0.7635    3.7736    3.2649 H   0  0  0  0  0  0  0  0  0  0  0  0
    2.1854    4.6666    2.6823 H   0  0  0  0  0  0  0  0  0  0  0  0
    2.2075    2.9883   -1.1149 H   0  0  0  0  0  0  0  0  0  0  0  0
    2.9003    2.7110    1.5181 H   0  0  0  0  0  0  0  0  0  0  0  0
    1.0806    5.8396   -2.5318 H   0  0  0  0  0  0  0  0  0  0  0  0
    2.0640    6.9199   -1.5829 H   0  0  0  0  0  0  0  0  0  0  0  0
    1.4597    1.5978    3.0714 H   0  0  0  0  0  0  0  0  0  0  0  0
    0.5066    1.0015    1.7175 H   0  0  0  0  0  0  0  0  0  0  0  0
    1.2712   -0.9484    0.5540 H   0  0  0  0  0  0  0  0  0  0  0  0
    4.8123   -2.8913    1.7929 H   0  0  0  0  0  0  0  0  0  0  0  0
    5.3326   -1.0351    3.1822 H   0  0  0  0  0  0  0  0  0  0  0  0
    3.8701    0.8744    3.3014 H   0  0  0  0  0  0  0  0  0  0  0  0
    1.2259    9.1515   -1.0499 H   0  0  0  0  0  0  0  0  0  0  0  0
   -2.8167    8.3211   -3.5751 H   0  0  0  0  0  0  0  0  0  0  0  0
   -1.1841    6.3846   -3.1375 H   0  0  0  0  0  0  0  0  0  0  0  0
    3.2395   -5.3248   -0.4844 H   0  0  0  0  0  0  0  0  0  0  0  0
    4.5648   -4.2174   -0.1514 H   0  0  0  0  0  0  0  0  0  0  0  0
    3.6327   -4.9174    1.1833 H   0  0  0  0  0  0  0  0  0  0  0  0
    2.2957   -3.6300   -2.0469 H   0  0  0  0  0  0  0  0  0  0  0  0
    3.5068   -2.4015   -1.6588 H   0  0  0  0  0  0  0  0  0  0  0  0
    1.7860   -2.0317   -1.5207 H   0  0  0  0  0  0  0  0  0  0  0  0
    0.8924   -4.7259   -0.0517 H   0  0  0  0  0  0  0  0  0  0  0  0
    0.3800   -3.1131    0.4137 H   0  0  0  0  0  0  0  0  0  0  0  0
    1.1802   -4.1527    1.5958 H   0  0  0  0  0  0  0  0  0  0  0  0
   -3.4030   10.8523   -3.1616 H   0  0  0  0  0  0  0  0  0  0  0  0
   -2.3403   11.7891   -2.2646 H   0  0  0  0  0  0  0  0  0  0  0  0
  1  2  1  0  0  0  0
  1 35  1  0  0  0  0
  1 36  1  0  0  0  0
  2  3  1  0  0  0  0
  2 11  1  0  0  0  0
  2 37  1  6  0  0  0
  3  4  1  0  0  0  0
  3  9  1  0  0  0  0
  3 38  1  1  0  0  0
  4  5  1  0  0  0  0
  4 10  1  0  0  0  0
  4 39  1  6  0  0  0
  5  6  1  0  0  0  0
  5 40  1  0  0  0  0
  5 41  1  0  0  0  0
  6  1  1  0  0  0  0
  6  7  2  0  0  0  0
  6  8  2  0  0  0  0
  9 42  1  0  0  0  0
 10 12  1  0  0  0  0
 10 43  1  0  0  0  0
 11 19  1  0  0  0  0
 11 44  1  0  0  0  0
 11 45  1  0  0  0  0
 12 13  1  0  0  0  0
 12 46  1  0  0  0  0
 12 47  1  0  0  0  0
 13 14  2  0  0  0  0
 14 15  1  0  0  0  0
 14 48  1  0  0  0  0
 15 16  2  0  0  0  0
 15 25  1  0  0  0  0
 16 17  1  0  0  0  0
 16 49  1  0  0  0  0
 17 18  2  0  0  0  0
 17 50  1  0  0  0  0
 18 13  1  0  0  0  0
 18 51  1  0  0  0  0
 19 20  2  0  0  0  0
 20 21  1  0  0  0  0
 20 52  1  0  0  0  0
 21 22  2  0  0  0  0
 21 30  1  0  0  0  0
 22 23  1  0  0  0  0
 22 29  1  0  0  0  0
 23 24  2  0  0  0  0
 23 53  1  0  0  0  0
 24 19  1  0  0  0  0
 24 54  1  0  0  0  0
 25 26  1  0  0  0  0
 25 27  1  0  0  0  0
 25 28  1  0  0  0  0
 26 55  1  0  0  0  0
 26 56  1  0  0  0  0
 26 57  1  0  0  0  0
 27 58  1  0  0  0  0
 27 59  1  0  0  0  0
 27 60  1  0  0  0  0
 28 61  1  0  0  0  0
 28 62  1  0  0  0  0
 28 63  1  0  0  0  0
 29 64  1  0  0  0  0
 29 65  1  0  0  0  0
 30 31  1  0  0  0  0
 31 32  1  0  0  0  0
 31 33  1  0  0  0  0
 31 34  1  0  0  0  0
M  END
$$$$
Dataset (28)
 OpenBabel02101614293D

 70 72  0  0  0  0  0  0  0  0999 V2000
    0.9072    6.9000    1.0770 C   0  0  0  0  0  0  0  0  0  0  0  0
    2.2403    6.5203    0.3571 C   0  0  2  0  0  0  0  0  0  0  0  0
    3.1642    5.6573    1.2963 C   0  0  1  0  0  0  0  0  0  0  0  0
    2.5581    4.2809    1.7579 C   0  0  2  0  0  0  0  0  0  0  0  0
    1.2747    4.4574    2.6206 C   0  0  0  0  0  0  0  0  0  0  0  0
    0.0329    5.4310    1.7085 S   0  0  0  0  0  0  0  0  0  0  0  0
   -1.1580    5.8742    2.6849 O   0  0  0  0  0  0  0  0  0  0  0  0
   -0.5435    4.5765    0.4803 O   0  0  0  0  0  0  0  0  0  0  0  0
    4.3965    5.3990    0.6202 O   0  0  0  0  0  0  0  0  0  0  0  0
    3.5904    3.5184    2.5179 N   0  0  0  0  0  0  0  0  0  0  0  0
    2.9506    7.8141   -0.1892 C   0  0  0  0  0  0  0  0  0  0  0  0
    3.3063    2.0912    2.8100 C   0  0  0  0  0  0  0  0  0  0  0  0
    4.4464    1.4925    3.5474 C   0  0  0  0  0  0  0  0  0  0  0  0
    5.4406    0.7640    2.8589 C   0  0  0  0  0  0  0  0  0  0  0  0
    6.5115    0.1066    3.5249 C   0  0  0  0  0  0  0  0  0  0  0  0
    6.5584    0.2397    4.9390 C   0  0  0  0  0  0  0  0  0  0  0  0
    5.6031    0.9976    5.6393 C   0  0  0  0  0  0  0  0  0  0  0  0
    4.5527    1.6244    4.9491 C   0  0  0  0  0  0  0  0  0  0  0  0
    2.0944    8.5650   -1.1577 C   0  0  0  0  0  0  0  0  0  0  0  0
    1.2459    9.6062   -0.7123 C   0  0  0  0  0  0  0  0  0  0  0  0
    0.2494   10.1642   -1.5495 C   0  0  0  0  0  0  0  0  0  0  0  0
    0.1809    9.7249   -2.8993 C   0  0  0  0  0  0  0  0  0  0  0  0
    1.0896    8.7553   -3.3804 C   0  0  0  0  0  0  0  0  0  0  0  0
    2.0361    8.1796   -2.5140 C   0  0  0  0  0  0  0  0  0  0  0  0
    7.5246   -0.6877    2.7133 C   0  0  0  0  0  0  0  0  0  0  0  0
    8.6367   -1.3990    3.5633 C   0  0  0  0  0  0  0  0  0  0  0  0
    8.2596    0.2725    1.7154 C   0  0  0  0  0  0  0  0  0  0  0  0
    6.7771   -1.8118    1.9153 C   0  0  0  0  0  0  0  0  0  0  0  0
   -0.7524   10.2025   -3.7527 N   0  0  0  0  0  0  0  0  0  0  0  0
    1.0558    8.3501   -4.6247 F   0  0  0  0  0  0  0  0  0  0  0  0
   -3.0865   11.4664    0.0439 C   0  0  0  0  0  0  0  0  0  0  0  0
   -2.0552   10.4684   -0.5331 C   0  0  0  0  0  0  0  0  0  0  0  0
   -0.7247   11.1419   -0.9728 C   0  0  0  0  0  0  0  0  0  0  0  0
    1.1081    7.5746    1.9131 H   0  0  0  0  0  0  0  0  0  0  0  0
    0.2142    7.3849    0.3935 H   0  0  0  0  0  0  0  0  0  0  0  0
    1.9926    5.8947   -0.5073 H   0  0  0  0  0  0  0  0  0  0  0  0
    3.4079    6.2447    2.1864 H   0  0  0  0  0  0  0  0  0  0  0  0
    2.3025    3.7089    0.8595 H   0  0  0  0  0  0  0  0  0  0  0  0
    0.8120    3.5011    2.8597 H   0  0  0  0  0  0  0  0  0  0  0  0
    1.5185    4.9691    3.5546 H   0  0  0  0  0  0  0  0  0  0  0  0
    5.0051    5.0439    1.3038 H   0  0  0  0  0  0  0  0  0  0  0  0
    3.7373    3.9946    3.4089 H   0  0  0  0  0  0  0  0  0  0  0  0
    3.2200    8.4568    0.6538 H   0  0  0  0  0  0  0  0  0  0  0  0
    3.8901    7.5481   -0.6819 H   0  0  0  0  0  0  0  0  0  0  0  0
    2.4076    1.9753    3.4192 H   0  0  0  0  0  0  0  0  0  0  0  0
    3.1313    1.5553    1.8723 H   0  0  0  0  0  0  0  0  0  0  0  0
    5.3698    0.7132    1.8399 H   0  0  0  0  0  0  0  0  0  0  0  0
    7.2909   -0.2096    5.4896 H   0  0  0  0  0  0  0  0  0  0  0  0
    5.6728    1.0881    6.6564 H   0  0  0  0  0  0  0  0  0  0  0  0
    3.8620    2.1681    5.4758 H   0  0  0  0  0  0  0  0  0  0  0  0
    1.3217    9.9224    0.2597 H   0  0  0  0  0  0  0  0  0  0  0  0
    2.6718    7.4585   -2.8705 H   0  0  0  0  0  0  0  0  0  0  0  0
    9.3286   -1.9548    2.9236 H   0  0  0  0  0  0  0  0  0  0  0  0
    9.2256   -0.6736    4.1282 H   0  0  0  0  0  0  0  0  0  0  0  0
    8.1971   -2.1103    4.2652 H   0  0  0  0  0  0  0  0  0  0  0  0
    9.0275   -0.2571    1.1468 H   0  0  0  0  0  0  0  0  0  0  0  0
    8.7400    1.0927    2.2551 H   0  0  0  0  0  0  0  0  0  0  0  0
    7.5682    0.7065    0.9913 H   0  0  0  0  0  0  0  0  0  0  0  0
    7.4776   -2.4372    1.3579 H   0  0  0  0  0  0  0  0  0  0  0  0
    6.0766   -1.3948    1.1896 H   0  0  0  0  0  0  0  0  0  0  0  0
    6.2122   -2.4522    2.5978 H   0  0  0  0  0  0  0  0  0  0  0  0
   -1.4125   10.8448   -3.4563 H   0  0  0  0  0  0  0  0  0  0  0  0
   -0.7671    9.9009   -4.6724 H   0  0  0  0  0  0  0  0  0  0  0  0
   -3.3432   12.2218   -0.7015 H   0  0  0  0  0  0  0  0  0  0  0  0
   -3.9991   10.9363    0.3275 H   0  0  0  0  0  0  0  0  0  0  0  0
   -2.6859   11.9615    0.9307 H   0  0  0  0  0  0  0  0  0  0  0  0
   -1.8416    9.7178    0.2327 H   0  0  0  0  0  0  0  0  0  0  0  0
   -2.5086    9.9609   -1.3879 H   0  0  0  0  0  0  0  0  0  0  0  0
   -0.2875   11.6316   -0.0996 H   0  0  0  0  0  0  0  0  0  0  0  0
   -0.9328   11.9309   -1.6976 H   0  0  0  0  0  0  0  0  0  0  0  0
  1  2  1  0  0  0  0
  1 34  1  0  0  0  0
  1 35  1  0  0  0  0
  2  3  1  0  0  0  0
  2 11  1  0  0  0  0
  2 36  1  6  0  0  0
  3  4  1  0  0  0  0
  3  9  1  0  0  0  0
  3 37  1  1  0  0  0
  4  5  1  0  0  0  0
  4 10  1  0  0  0  0
  4 38  1  6  0  0  0
  5  6  1  0  0  0  0
  5 39  1  0  0  0  0
  5 40  1  0  0  0  0
  6  1  1  0  0  0  0
  6  7  2  0  0  0  0
  6  8  2  0  0  0  0
  9 41  1  0  0  0  0
 10 12  1  0  0  0  0
 10 42  1  0  0  0  0
 11 19  1  0  0  0  0
 11 43  1  0  0  0  0
 11 44  1  0  0  0  0
 12 13  1  0  0  0  0
 12 45  1  0  0  0  0
 12 46  1  0  0  0  0
 13 14  2  0  0  0  0
 14 15  1  0  0  0  0
 14 47  1  0  0  0  0
 15 16  2  0  0  0  0
 15 25  1  0  0  0  0
 16 17  1  0  0  0  0
 16 48  1  0  0  0  0
 17 18  2  0  0  0  0
 17 49  1  0  0  0  0
 18 13  1  0  0  0  0
 18 50  1  0  0  0  0
 19 20  2  0  0  0  0
 20 21  1  0  0  0  0
 20 51  1  0  0  0  0
 21 22  2  0  0  0  0
 21 33  1  0  0  0  0
 22 23  1  0  0  0  0
 22 29  1  0  0  0  0
 23 24  2  0  0  0  0
 23 30  1  0  0  0  0
 24 19  1  0  0  0  0
 24 52  1  0  0  0  0
 25 26  1  0  0  0  0
 25 27  1  0  0  0  0
 25 28  1  0  0  0  0
 26 53  1  0  0  0  0
 26 54  1  0  0  0  0
 26 55  1  0  0  0  0
 27 56  1  0  0  0  0
 27 57  1  0  0  0  0
 27 58  1  0  0  0  0
 28 59  1  0  0  0  0
 28 60  1  0  0  0  0
 28 61  1  0  0  0  0
 29 62  1  0  0  0  0
 29 63  1  0  0  0  0
 31 32  1  0  0  0  0
 31 64  1  0  0  0  0
 31 65  1  0  0  0  0
 31 66  1  0  0  0  0
 32 33  1  0  0  0  0
 32 67  1  0  0  0  0
 32 68  1  0  0  0  0
 33 69  1  0  0  0  0
 33 70  1  0  0  0  0
M  END
$$$$
Dataset (29)
 OpenBabel02101614293D

 60 62  0  0  0  0  0  0  0  0999 V2000
    0.6484   -5.2984    0.2012 C   0  0  0  0  0  0  0  0  0  0  0  0
    1.0268   -4.2495    1.2911 C   0  0  2  0  0  0  0  0  0  0  0  0
    1.7396   -2.9915    0.6578 C   0  0  1  0  0  0  0  0  0  0  0  0
    0.8817   -2.1772   -0.3800 C   0  0  2  0  0  0  0  0  0  0  0  0
    0.4998   -3.0283   -1.6248 C   0  0  0  0  0  0  0  0  0  0  0  0
   -0.3699   -4.5483   -1.1118 S   0  0  0  0  0  0  0  0  0  0  0  0
   -0.5076   -5.5580   -2.3486 O   0  0  0  0  0  0  0  0  0  0  0  0
   -1.8165   -4.1844   -0.5231 O   0  0  0  0  0  0  0  0  0  0  0  0
    2.1381   -2.1045    1.7072 O   0  0  0  0  0  0  0  0  0  0  0  0
    1.6344   -0.9584   -0.8034 N   0  0  0  0  0  0  0  0  0  0  0  0
    1.8846   -4.9417    2.4119 C   0  0  0  0  0  0  0  0  0  0  0  0
    0.8784    0.0804   -1.5487 C   0  0  0  0  0  0  0  0  0  0  0  0
    1.7496    1.2410   -1.8652 C   0  0  0  0  0  0  0  0  0  0  0  0
    1.7321    2.3976   -1.0539 C   0  0  0  0  0  0  0  0  0  0  0  0
    2.4964    3.5593   -1.3554 C   0  0  0  0  0  0  0  0  0  0  0  0
    3.3128    3.5014   -2.5177 C   0  0  0  0  0  0  0  0  0  0  0  0
    3.3696    2.3502   -3.3219 C   0  0  0  0  0  0  0  0  0  0  0  0
    2.5926    1.2260   -2.9979 C   0  0  0  0  0  0  0  0  0  0  0  0
    1.1965   -6.0793    3.0967 C   0  0  0  0  0  0  0  0  0  0  0  0
    1.3586   -7.4159    2.6581 C   0  0  0  0  0  0  0  0  0  0  0  0
    0.6264   -8.4631    3.2468 C   0  0  0  0  0  0  0  0  0  0  0  0
   -0.2566   -8.1670    4.2999 C   0  0  0  0  0  0  0  0  0  0  0  0
   -0.3659   -6.8875    4.7394 N   0  0  0  0  0  0  0  0  0  0  0  0
    0.3244   -5.8571    4.1865 C   0  0  0  0  0  0  0  0  0  0  0  0
    2.4104    4.7783   -0.4470 C   0  0  0  0  0  0  0  0  0  0  0  0
    3.2731    6.0052   -0.9122 C   0  0  0  0  0  0  0  0  0  0  0  0
    2.9103    4.3870    0.9856 C   0  0  0  0  0  0  0  0  0  0  0  0
    0.9226    5.2679   -0.3867 C   0  0  0  0  0  0  0  0  0  0  0  0
   -0.9912   -9.1321    4.8786 N   0  0  0  0  0  0  0  0  0  0  0  0
    1.5513   -5.7151   -0.2513 H   0  0  0  0  0  0  0  0  0  0  0  0
    0.0587   -6.1109    0.6235 H   0  0  0  0  0  0  0  0  0  0  0  0
    0.1018   -3.8989    1.7615 H   0  0  0  0  0  0  0  0  0  0  0  0
    2.6550   -3.3266    0.1621 H   0  0  0  0  0  0  0  0  0  0  0  0
   -0.0361   -1.8551    0.1242 H   0  0  0  0  0  0  0  0  0  0  0  0
   -0.1703   -2.4881   -2.2923 H   0  0  0  0  0  0  0  0  0  0  0  0
    1.4007   -3.2995   -2.1786 H   0  0  0  0  0  0  0  0  0  0  0  0
    2.7332   -1.4508    1.2832 H   0  0  0  0  0  0  0  0  0  0  0  0
    2.4143   -1.2597   -1.3921 H   0  0  0  0  0  0  0  0  0  0  0  0
    2.8222   -5.2936    1.9750 H   0  0  0  0  0  0  0  0  0  0  0  0
    2.1616   -4.2061    3.1711 H   0  0  0  0  0  0  0  0  0  0  0  0
    0.4833   -0.3144   -2.4866 H   0  0  0  0  0  0  0  0  0  0  0  0
    0.0221    0.4033   -0.9502 H   0  0  0  0  0  0  0  0  0  0  0  0
    1.1378    2.3870   -0.2218 H   0  0  0  0  0  0  0  0  0  0  0  0
    3.8898    4.2935   -2.8015 H   0  0  0  0  0  0  0  0  0  0  0  0
    3.9761    2.3335   -4.1455 H   0  0  0  0  0  0  0  0  0  0  0  0
    2.6366    0.3991   -3.6005 H   0  0  0  0  0  0  0  0  0  0  0  0
    1.9966   -7.6308    1.8887 H   0  0  0  0  0  0  0  0  0  0  0  0
    0.7325   -9.4219    2.9052 H   0  0  0  0  0  0  0  0  0  0  0  0
    0.2023   -4.9202    4.5760 H   0  0  0  0  0  0  0  0  0  0  0  0
    3.1690    6.8490   -0.2255 H   0  0  0  0  0  0  0  0  0  0  0  0
    4.3332    5.7456   -0.9554 H   0  0  0  0  0  0  0  0  0  0  0  0
    2.9634    6.3451   -1.9028 H   0  0  0  0  0  0  0  0  0  0  0  0
    2.9049    5.2459    1.6606 H   0  0  0  0  0  0  0  0  0  0  0  0
    3.9296    3.9955    0.9415 H   0  0  0  0  0  0  0  0  0  0  0  0
    2.2768    3.6229    1.4356 H   0  0  0  0  0  0  0  0  0  0  0  0
    0.8218    6.1722    0.2176 H   0  0  0  0  0  0  0  0  0  0  0  0
    0.2697    4.5157    0.0561 H   0  0  0  0  0  0  0  0  0  0  0  0
    0.5527    5.4838   -1.3923 H   0  0  0  0  0  0  0  0  0  0  0  0
   -1.5780   -8.9124    5.6195 H   0  0  0  0  0  0  0  0  0  0  0  0
   -0.9444  -10.0441    4.5471 H   0  0  0  0  0  0  0  0  0  0  0  0
  1  2  1  0  0  0  0
  1 30  1  0  0  0  0
  1 31  1  0  0  0  0
  2  3  1  0  0  0  0
  2 11  1  0  0  0  0
  2 32  1  1  0  0  0
  3  4  1  0  0  0  0
  3  9  1  0  0  0  0
  3 33  1  6  0  0  0
  4  5  1  0  0  0  0
  4 10  1  0  0  0  0
  4 34  1  1  0  0  0
  5  6  1  0  0  0  0
  5 35  1  0  0  0  0
  5 36  1  0  0  0  0
  6  1  1  0  0  0  0
  6  7  2  0  0  0  0
  6  8  2  0  0  0  0
  9 37  1  0  0  0  0
 10 12  1  0  0  0  0
 10 38  1  0  0  0  0
 11 19  1  0  0  0  0
 11 39  1  0  0  0  0
 11 40  1  0  0  0  0
 12 13  1  0  0  0  0
 12 41  1  0  0  0  0
 12 42  1  0  0  0  0
 13 14  2  0  0  0  0
 14 15  1  0  0  0  0
 14 43  1  0  0  0  0
 15 16  2  0  0  0  0
 15 25  1  0  0  0  0
 16 17  1  0  0  0  0
 16 44  1  0  0  0  0
 17 18  2  0  0  0  0
 17 45  1  0  0  0  0
 18 13  1  0  0  0  0
 18 46  1  0  0  0  0
 19 20  2  0  0  0  0
 20 21  1  0  0  0  0
 20 47  1  0  0  0  0
 21 22  2  0  0  0  0
 21 48  1  0  0  0  0
 22 23  1  0  0  0  0
 22 29  1  0  0  0  0
 23 24  2  0  0  0  0
 24 19  1  0  0  0  0
 24 49  1  0  0  0  0
 25 26  1  0  0  0  0
 25 27  1  0  0  0  0
 25 28  1  0  0  0  0
 26 50  1  0  0  0  0
 26 51  1  0  0  0  0
 26 52  1  0  0  0  0
 27 53  1  0  0  0  0
 27 54  1  0  0  0  0
 27 55  1  0  0  0  0
 28 56  1  0  0  0  0
 28 57  1  0  0  0  0
 28 58  1  0  0  0  0
 29 59  1  0  0  0  0
 29 60  1  0  0  0  0
M  END
$$$$
Dataset (30)
 OpenBabel02101614293D

 62 65  0  0  0  0  0  0  0  0999 V2000
    0.6480   -5.2990    0.2003 C   0  0  0  0  0  0  0  0  0  0  0  0
    1.0458   -4.2442    1.2819 C   0  0  2  0  0  0  0  0  0  0  0  0
    1.7558   -2.9907    0.6409 C   0  0  1  0  0  0  0  0  0  0  0  0
    0.8999   -2.1876   -0.4031 C   0  0  2  0  0  0  0  0  0  0  0  0
    0.4968   -3.0458   -1.6349 C   0  0  0  0  0  0  0  0  0  0  0  0
   -0.3784   -4.5577   -1.1116 S   0  0  0  0  0  0  0  0  0  0  0  0
   -0.5276   -5.5762   -2.3405 O   0  0  0  0  0  0  0  0  0  0  0  0
   -1.8232   -4.1811   -0.5273 O   0  0  0  0  0  0  0  0  0  0  0  0
    2.1269   -2.0824    1.6812 O   0  0  0  0  0  0  0  0  0  0  0  0
    1.6617   -0.9835   -0.8541 N   0  0  0  0  0  0  0  0  0  0  0  0
    1.9165   -4.9157    2.4046 C   0  0  0  0  0  0  0  0  0  0  0  0
    0.8889    0.0758   -1.5560 C   0  0  0  0  0  0  0  0  0  0  0  0
    1.7440    1.2511   -1.8659 C   0  0  0  0  0  0  0  0  0  0  0  0
    1.7180    2.4124   -1.0581 C   0  0  0  0  0  0  0  0  0  0  0  0
    2.4962    3.5696   -1.3405 C   0  0  0  0  0  0  0  0  0  0  0  0
    3.3302    3.5046   -2.4889 C   0  0  0  0  0  0  0  0  0  0  0  0
    3.3744    2.3589   -3.3016 C   0  0  0  0  0  0  0  0  0  0  0  0
    2.5877    1.2390   -2.9956 C   0  0  0  0  0  0  0  0  0  0  0  0
    1.2139   -6.0400    3.0943 C   0  0  0  0  0  0  0  0  0  0  0  0
    1.3767   -7.3765    2.6391 C   0  0  0  0  0  0  0  0  0  0  0  0
    0.5731   -8.3825    3.1971 C   0  0  0  0  0  0  0  0  0  0  0  0
   -0.3303   -8.1081    4.2111 C   0  0  0  0  0  0  0  0  0  0  0  0
   -0.4605   -6.8136    4.7367 C   0  0  0  0  0  0  0  0  0  0  0  0
    0.3131   -5.7793    4.1649 C   0  0  0  0  0  0  0  0  0  0  0  0
    2.4077    4.7936   -0.4395 C   0  0  0  0  0  0  0  0  0  0  0  0
    3.2793    6.0102   -0.9145 C   0  0  0  0  0  0  0  0  0  0  0  0
    2.9106    4.4089    0.9931 C   0  0  0  0  0  0  0  0  0  0  0  0
    0.9271    5.3097   -0.3741 C   0  0  0  0  0  0  0  0  0  0  0  0
    0.4316   -9.7349    2.9253 C   0  0  0  0  0  0  0  0  0  0  0  0
   -0.5253  -10.2176    3.7430 N   0  0  0  0  0  0  0  0  0  0  0  0
   -0.9668   -9.2530    4.4966 N   0  0  0  0  0  0  0  0  0  0  0  0
    1.5432   -5.7186   -0.2607 H   0  0  0  0  0  0  0  0  0  0  0  0
    0.0558   -6.1100    0.6235 H   0  0  0  0  0  0  0  0  0  0  0  0
    0.1236   -3.8890    1.7533 H   0  0  0  0  0  0  0  0  0  0  0  0
    2.6811   -3.3213    0.1619 H   0  0  0  0  0  0  0  0  0  0  0  0
   -0.0111   -1.8564    0.1079 H   0  0  0  0  0  0  0  0  0  0  0  0
   -0.1758   -2.5000   -2.2949 H   0  0  0  0  0  0  0  0  0  0  0  0
    1.3874   -3.3384   -2.1938 H   0  0  0  0  0  0  0  0  0  0  0  0
    2.6823   -1.4017    1.2444 H   0  0  0  0  0  0  0  0  0  0  0  0
    2.4004   -1.3037   -1.4838 H   0  0  0  0  0  0  0  0  0  0  0  0
    2.8560   -5.2680    1.9680 H   0  0  0  0  0  0  0  0  0  0  0  0
    2.1933   -4.1695    3.1551 H   0  0  0  0  0  0  0  0  0  0  0  0
    0.4772   -0.3007   -2.4958 H   0  0  0  0  0  0  0  0  0  0  0  0
    0.0426    0.3771   -0.9310 H   0  0  0  0  0  0  0  0  0  0  0  0
    1.1108    2.4088   -0.2389 H   0  0  0  0  0  0  0  0  0  0  0  0
    3.9237    4.2887   -2.7655 H   0  0  0  0  0  0  0  0  0  0  0  0
    3.9770    2.3451   -4.1285 H   0  0  0  0  0  0  0  0  0  0  0  0
    2.6314    0.4218   -3.6084 H   0  0  0  0  0  0  0  0  0  0  0  0
    2.0314   -7.6095    1.8896 H   0  0  0  0  0  0  0  0  0  0  0  0
   -1.1102   -6.6232    5.5016 H   0  0  0  0  0  0  0  0  0  0  0  0
    0.2035   -4.8280    4.5271 H   0  0  0  0  0  0  0  0  0  0  0  0
    3.1808    6.8626   -0.2390 H   0  0  0  0  0  0  0  0  0  0  0  0
    4.3378    5.7421   -0.9473 H   0  0  0  0  0  0  0  0  0  0  0  0
    2.9721    6.3430   -1.9090 H   0  0  0  0  0  0  0  0  0  0  0  0
    2.9023    5.2754    1.6596 H   0  0  0  0  0  0  0  0  0  0  0  0
    3.9351    4.0306    0.9462 H   0  0  0  0  0  0  0  0  0  0  0  0
    2.2888    3.6369    1.4518 H   0  0  0  0  0  0  0  0  0  0  0  0
    0.8522    6.2215    0.2247 H   0  0  0  0  0  0  0  0  0  0  0  0
    0.2542    4.5755    0.0730 H   0  0  0  0  0  0  0  0  0  0  0  0
    0.5576    5.5377   -1.3768 H   0  0  0  0  0  0  0  0  0  0  0  0
    0.9480  -10.2719    2.2242 H   0  0  0  0  0  0  0  0  0  0  0  0
   -1.6658   -9.3462    5.1633 H   0  0  0  0  0  0  0  0  0  0  0  0
  1  2  1  0  0  0  0
  1 32  1  0  0  0  0
  1 33  1  0  0  0  0
  2  3  1  0  0  0  0
  2 11  1  0  0  0  0
  2 34  1  1  0  0  0
  3  4  1  0  0  0  0
  3  9  1  0  0  0  0
  3 35  1  6  0  0  0
  4  5  1  0  0  0  0
  4 10  1  0  0  0  0
  4 36  1  1  0  0  0
  5  6  1  0  0  0  0
  5 37  1  0  0  0  0
  5 38  1  0  0  0  0
  6  1  1  0  0  0  0
  6  7  2  0  0  0  0
  6  8  2  0  0  0  0
  9 39  1  0  0  0  0
 10 12  1  0  0  0  0
 10 40  1  0  0  0  0
 11 19  1  0  0  0  0
 11 41  1  0  0  0  0
 11 42  1  0  0  0  0
 12 13  1  0  0  0  0
 12 43  1  0  0  0  0
 12 44  1  0  0  0  0
 13 14  2  0  0  0  0
 14 15  1  0  0  0  0
 14 45  1  0  0  0  0
 15 16  2  0  0  0  0
 15 25  1  0  0  0  0
 16 17  1  0  0  0  0
 16 46  1  0  0  0  0
 17 18  2  0  0  0  0
 17 47  1  0  0  0  0
 18 13  1  0  0  0  0
 18 48  1  0  0  0  0
 19 20  2  0  0  0  0
 20 21  1  0  0  0  0
 20 49  1  0  0  0  0
 21 22  2  0  0  0  0
 21 29  1  0  0  0  0
 22 23  1  0  0  0  0
 23 24  2  0  0  0  0
 23 50  1  0  0  0  0
 24 19  1  0  0  0  0
 24 51  1  0  0  0  0
 25 26  1  0  0  0  0
 25 27  1  0  0  0  0
 25 28  1  0  0  0  0
 26 52  1  0  0  0  0
 26 53  1  0  0  0  0
 26 54  1  0  0  0  0
 27 55  1  0  0  0  0
 27 56  1  0  0  0  0
 27 57  1  0  0  0  0
 28 58  1  0  0  0  0
 28 59  1  0  0  0  0
 28 60  1  0  0  0  0
 29 30  2  0  0  0  0
 29 61  1  0  0  0  0
 30 31  1  0  0  0  0
 31 22  1  0  0  0  0
 31 62  1  0  0  0  0
M  END
$$$$
Dataset (31)
 OpenBabel02101614293D

 71 74  0  0  0  0  0  0  0  0999 V2000
    0.6761   -5.2596    0.2317 C   0  0  0  0  0  0  0  0  0  0  0  0
    1.0565   -4.1979    1.3123 C   0  0  2  0  0  0  0  0  0  0  0  0
    1.7660   -2.9513    0.6613 C   0  0  1  0  0  0  0  0  0  0  0  0
    0.8945   -2.1502   -0.3721 C   0  0  2  0  0  0  0  0  0  0  0  0
    0.5118   -3.0084   -1.6126 C   0  0  0  0  0  0  0  0  0  0  0  0
   -0.3442   -4.5306   -1.0897 S   0  0  0  0  0  0  0  0  0  0  0  0
   -0.4737   -5.5527   -2.3170 O   0  0  0  0  0  0  0  0  0  0  0  0
   -1.7942   -4.1744   -0.5053 O   0  0  0  0  0  0  0  0  0  0  0  0
    2.1746   -2.0578    1.7007 O   0  0  0  0  0  0  0  0  0  0  0  0
    1.6338   -0.9304   -0.7997 N   0  0  0  0  0  0  0  0  0  0  0  0
    1.9187   -4.8624    2.4456 C   0  0  0  0  0  0  0  0  0  0  0  0
    0.8679    0.0867   -1.5571 C   0  0  0  0  0  0  0  0  0  0  0  0
    1.7399    1.2413   -1.8775 C   0  0  0  0  0  0  0  0  0  0  0  0
    1.7311    2.3938   -1.0631 C   0  0  0  0  0  0  0  0  0  0  0  0
    2.4964    3.5546   -1.3594 C   0  0  0  0  0  0  0  0  0  0  0  0
    3.3105    3.4968   -2.5209 C   0  0  0  0  0  0  0  0  0  0  0  0
    3.3628    2.3446   -3.3252 C   0  0  0  0  0  0  0  0  0  0  0  0
    2.5844    1.2188   -3.0078 C   0  0  0  0  0  0  0  0  0  0  0  0
    1.2158   -5.9902    3.1250 C   0  0  0  0  0  0  0  0  0  0  0  0
    1.3715   -7.3158    2.6420 C   0  0  0  0  0  0  0  0  0  0  0  0
    0.5448   -8.3267    3.1601 C   0  0  0  0  0  0  0  0  0  0  0  0
   -0.3469   -8.0721    4.1900 C   0  0  0  0  0  0  0  0  0  0  0  0
   -0.4623   -6.7899    4.7496 C   0  0  0  0  0  0  0  0  0  0  0  0
    0.3166   -5.7472    4.1999 C   0  0  0  0  0  0  0  0  0  0  0  0
    2.4076    4.7689   -0.4488 C   0  0  0  0  0  0  0  0  0  0  0  0
    3.2719    5.9928   -0.9193 C   0  0  0  0  0  0  0  0  0  0  0  0
    2.9050    4.3747    0.9849 C   0  0  0  0  0  0  0  0  0  0  0  0
    0.9173    5.2549   -0.3873 C   0  0  0  0  0  0  0  0  0  0  0  0
    0.3549   -9.6616    2.8182 C   0  0  0  0  0  0  0  0  0  0  0  0
   -0.5954  -10.1536    3.6429 N   0  0  0  0  0  0  0  0  0  0  0  0
   -0.9968   -9.2158    4.4494 N   0  0  0  0  0  0  0  0  0  0  0  0
    1.0289  -10.4070    1.7361 C   0  0  0  0  0  0  0  0  0  0  0  0
    2.4380  -10.8878    2.1656 C   0  0  0  0  0  0  0  0  0  0  0  0
    3.1942  -11.6313    1.0418 C   0  0  0  0  0  0  0  0  0  0  0  0
    1.5773   -5.6860   -0.2166 H   0  0  0  0  0  0  0  0  0  0  0  0
    0.0779   -6.0638    0.6574 H   0  0  0  0  0  0  0  0  0  0  0  0
    0.1305   -3.8411    1.7770 H   0  0  0  0  0  0  0  0  0  0  0  0
    2.6757   -3.2949    0.1590 H   0  0  0  0  0  0  0  0  0  0  0  0
   -0.0207   -1.8348    0.1395 H   0  0  0  0  0  0  0  0  0  0  0  0
   -0.1685   -2.4772   -2.2764 H   0  0  0  0  0  0  0  0  0  0  0  0
    1.4091   -3.2783   -2.1750 H   0  0  0  0  0  0  0  0  0  0  0  0
    2.7645   -1.4057    1.2670 H   0  0  0  0  0  0  0  0  0  0  0  0
    2.4183   -1.2295   -1.3787 H   0  0  0  0  0  0  0  0  0  0  0  0
    2.8593   -5.2147    2.0141 H   0  0  0  0  0  0  0  0  0  0  0  0
    2.1870   -4.1188    3.2001 H   0  0  0  0  0  0  0  0  0  0  0  0
    0.4853   -0.3162   -2.4953 H   0  0  0  0  0  0  0  0  0  0  0  0
    0.0065    0.4056   -0.9637 H   0  0  0  0  0  0  0  0  0  0  0  0
    1.1418    2.3776   -0.2293 H   0  0  0  0  0  0  0  0  0  0  0  0
    3.8806    4.2928   -2.8067 H   0  0  0  0  0  0  0  0  0  0  0  0
    3.9700    2.3299   -4.1472 H   0  0  0  0  0  0  0  0  0  0  0  0
    2.6302    0.3874   -3.6077 H   0  0  0  0  0  0  0  0  0  0  0  0
    2.0330   -7.5301    1.8916 H   0  0  0  0  0  0  0  0  0  0  0  0
   -1.1115   -6.6116    5.5189 H   0  0  0  0  0  0  0  0  0  0  0  0
    0.2095   -4.8009    4.5759 H   0  0  0  0  0  0  0  0  0  0  0  0
    3.1674    6.8365   -0.2320 H   0  0  0  0  0  0  0  0  0  0  0  0
    4.3331    5.7327   -0.9623 H   0  0  0  0  0  0  0  0  0  0  0  0
    2.9603    6.3341   -1.9102 H   0  0  0  0  0  0  0  0  0  0  0  0
    2.8989    5.2355    1.6579 H   0  0  0  0  0  0  0  0  0  0  0  0
    3.9253    3.9836    0.9427 H   0  0  0  0  0  0  0  0  0  0  0  0
    2.2708    3.6085    1.4349 H   0  0  0  0  0  0  0  0  0  0  0  0
    0.8183    6.1586    0.2176 H   0  0  0  0  0  0  0  0  0  0  0  0
    0.2625    4.5016    0.0546 H   0  0  0  0  0  0  0  0  0  0  0  0
    0.5450    5.4740   -1.3917 H   0  0  0  0  0  0  0  0  0  0  0  0
   -1.6780   -9.3261    5.1318 H   0  0  0  0  0  0  0  0  0  0  0  0
    0.4197  -11.2730    1.4686 H   0  0  0  0  0  0  0  0  0  0  0  0
    1.1007   -9.7671    0.8516 H   0  0  0  0  0  0  0  0  0  0  0  0
    2.3394  -11.5646    3.0197 H   0  0  0  0  0  0  0  0  0  0  0  0
    3.0399  -10.0290    2.4758 H   0  0  0  0  0  0  0  0  0  0  0  0
    3.3771  -10.9601    0.1991 H   0  0  0  0  0  0  0  0  0  0  0  0
    4.1565  -11.9868    1.4194 H   0  0  0  0  0  0  0  0  0  0  0  0
    2.6162  -12.4917    0.6960 H   0  0  0  0  0  0  0  0  0  0  0  0
  1  2  1  0  0  0  0
  1 35  1  0  0  0  0
  1 36  1  0  0  0  0
  2  3  1  0  0  0  0
  2 11  1  0  0  0  0
  2 37  1  1  0  0  0
  3  4  1  0  0  0  0
  3  9  1  0  0  0  0
  3 38  1  6  0  0  0
  4  5  1  0  0  0  0
  4 10  1  0  0  0  0
  4 39  1  1  0  0  0
  5  6  1  0  0  0  0
  5 40  1  0  0  0  0
  5 41  1  0  0  0  0
  6  1  1  0  0  0  0
  6  7  2  0  0  0  0
  6  8  2  0  0  0  0
  9 42  1  0  0  0  0
 10 12  1  0  0  0  0
 10 43  1  0  0  0  0
 11 19  1  0  0  0  0
 11 44  1  0  0  0  0
 11 45  1  0  0  0  0
 12 13  1  0  0  0  0
 12 46  1  0  0  0  0
 12 47  1  0  0  0  0
 13 14  2  0  0  0  0
 14 15  1  0  0  0  0
 14 48  1  0  0  0  0
 15 16  2  0  0  0  0
 15 25  1  0  0  0  0
 16 17  1  0  0  0  0
 16 49  1  0  0  0  0
 17 18  2  0  0  0  0
 17 50  1  0  0  0  0
 18 13  1  0  0  0  0
 18 51  1  0  0  0  0
 19 20  2  0  0  0  0
 20 21  1  0  0  0  0
 20 52  1  0  0  0  0
 21 22  2  0  0  0  0
 21 29  1  0  0  0  0
 22 23  1  0  0  0  0
 23 24  2  0  0  0  0
 23 53  1  0  0  0  0
 24 19  1  0  0  0  0
 24 54  1  0  0  0  0
 25 26  1  0  0  0  0
 25 27  1  0  0  0  0
 25 28  1  0  0  0  0
 26 55  1  0  0  0  0
 26 56  1  0  0  0  0
 26 57  1  0  0  0  0
 27 58  1  0  0  0  0
 27 59  1  0  0  0  0
 27 60  1  0  0  0  0
 28 61  1  0  0  0  0
 28 62  1  0  0  0  0
 28 63  1  0  0  0  0
 29 30  2  0  0  0  0
 29 32  1  0  0  0  0
 30 31  1  0  0  0  0
 31 22  1  0  0  0  0
 31 64  1  0  0  0  0
 32 33  1  0  0  0  0
 32 65  1  0  0  0  0
 32 66  1  0  0  0  0
 33 34  1  0  0  0  0
 33 67  1  0  0  0  0
 33 68  1  0  0  0  0
 34 69  1  0  0  0  0
 34 70  1  0  0  0  0
 34 71  1  0  0  0  0
M  END
$$$$
Dataset (32)
 OpenBabel02101614293D

 63 66  0  0  0  0  0  0  0  0999 V2000
    0.6571   -5.2856    0.2137 C   0  0  0  0  0  0  0  0  0  0  0  0
    1.0574   -4.2247    1.2878 C   0  0  2  0  0  0  0  0  0  0  0  0
    1.7761   -2.9758    0.6414 C   0  0  1  0  0  0  0  0  0  0  0  0
    0.9018   -2.1758   -0.3928 C   0  0  2  0  0  0  0  0  0  0  0  0
    0.5001   -3.0310   -1.6279 C   0  0  0  0  0  0  0  0  0  0  0  0
   -0.3667   -4.5477   -1.1016 S   0  0  0  0  0  0  0  0  0  0  0  0
   -0.5080   -5.5722   -2.3263 O   0  0  0  0  0  0  0  0  0  0  0  0
   -1.8122   -4.1818   -0.5137 O   0  0  0  0  0  0  0  0  0  0  0  0
    2.0861   -2.0419    1.7246 O   0  0  0  0  0  0  0  0  0  0  0  0
    1.6502   -0.9632   -0.8382 N   0  0  0  0  0  0  0  0  0  0  0  0
    1.9279   -4.9035    2.4091 C   0  0  0  0  0  0  0  0  0  0  0  0
    0.8815    0.0838   -1.5578 C   0  0  0  0  0  0  0  0  0  0  0  0
    1.7458    1.2509   -1.8721 C   0  0  0  0  0  0  0  0  0  0  0  0
    1.7272    2.4049   -1.0586 C   0  0  0  0  0  0  0  0  0  0  0  0
    2.4976    3.5662   -1.3502 C   0  0  0  0  0  0  0  0  0  0  0  0
    3.3206    3.5041   -2.5065 C   0  0  0  0  0  0  0  0  0  0  0  0
    3.3739    2.3597   -3.3165 C   0  0  0  0  0  0  0  0  0  0  0  0
    2.5921    1.2393   -3.0014 C   0  0  0  0  0  0  0  0  0  0  0  0
    1.2300   -6.0342    3.0980 C   0  0  0  0  0  0  0  0  0  0  0  0
    1.3919   -7.3685    2.6379 C   0  0  0  0  0  0  0  0  0  0  0  0
    0.5797   -8.3802    3.1769 C   0  0  0  0  0  0  0  0  0  0  0  0
   -0.3226   -8.1106    4.2018 C   0  0  0  0  0  0  0  0  0  0  0  0
   -0.4449   -6.8189    4.7348 C   0  0  0  0  0  0  0  0  0  0  0  0
    0.3278   -5.7835    4.1672 C   0  0  0  0  0  0  0  0  0  0  0  0
    2.4101    4.7852   -0.4438 C   0  0  0  0  0  0  0  0  0  0  0  0
    3.2757    6.0081   -0.9139 C   0  0  0  0  0  0  0  0  0  0  0  0
    2.9114    4.3942    0.9881 C   0  0  0  0  0  0  0  0  0  0  0  0
    0.9243    5.2828   -0.3832 C   0  0  0  0  0  0  0  0  0  0  0  0
    0.4469   -9.7262    2.8604 C   0  0  0  0  0  0  0  0  0  0  0  0
   -0.5428  -10.2304    3.6998 C   0  0  0  0  0  0  0  0  0  0  0  0
   -0.9814   -9.2416    4.5000 N   0  0  0  0  0  0  0  0  0  0  0  0
    1.5533   -5.7163   -0.2392 H   0  0  0  0  0  0  0  0  0  0  0  0
    0.0648   -6.0905    0.6498 H   0  0  0  0  0  0  0  0  0  0  0  0
    0.1369   -3.8673    1.7631 H   0  0  0  0  0  0  0  0  0  0  0  0
    2.6694   -3.3709    0.0847 H   0  0  0  0  0  0  0  0  0  0  0  0
   -0.0122   -1.8552    0.1199 H   0  0  0  0  0  0  0  0  0  0  0  0
   -0.1785   -2.4870   -2.2857 H   0  0  0  0  0  0  0  0  0  0  0  0
    1.3928   -3.3102   -2.1934 H   0  0  0  0  0  0  0  0  0  0  0  0
    2.6719   -1.3687    1.3189 H   0  0  0  0  0  0  0  0  0  0  0  0
    2.4107   -1.2753   -1.4456 H   0  0  0  0  0  0  0  0  0  0  0  0
    2.8662   -5.2575    1.9695 H   0  0  0  0  0  0  0  0  0  0  0  0
    2.2043   -4.1626    3.1639 H   0  0  0  0  0  0  0  0  0  0  0  0
    0.4769   -0.3045   -2.4916 H   0  0  0  0  0  0  0  0  0  0  0  0
    0.0303    0.3938   -0.9464 H   0  0  0  0  0  0  0  0  0  0  0  0
    1.1268    2.3903   -0.2327 H   0  0  0  0  0  0  0  0  0  0  0  0
    3.9029    4.2872   -2.7925 H   0  0  0  0  0  0  0  0  0  0  0  0
    3.9817    2.3431   -4.1393 H   0  0  0  0  0  0  0  0  0  0  0  0
    2.6382    0.4173   -3.6073 H   0  0  0  0  0  0  0  0  0  0  0  0
    2.0510   -7.5940    1.8894 H   0  0  0  0  0  0  0  0  0  0  0  0
   -1.0952   -6.6312    5.5008 H   0  0  0  0  0  0  0  0  0  0  0  0
    0.2120   -4.8348    4.5278 H   0  0  0  0  0  0  0  0  0  0  0  0
    3.1733    6.8550   -0.2298 H   0  0  0  0  0  0  0  0  0  0  0  0
    4.3358    5.7441   -0.9491 H   0  0  0  0  0  0  0  0  0  0  0  0
    2.9628    6.3464   -1.9054 H   0  0  0  0  0  0  0  0  0  0  0  0
    2.9048    5.2571    1.6586 H   0  0  0  0  0  0  0  0  0  0  0  0
    3.9332    4.0079    0.9406 H   0  0  0  0  0  0  0  0  0  0  0  0
    2.2798    3.6270    1.4406 H   0  0  0  0  0  0  0  0  0  0  0  0
    0.8325    6.1896    0.2190 H   0  0  0  0  0  0  0  0  0  0  0  0
    0.2648    4.5363    0.0623 H   0  0  0  0  0  0  0  0  0  0  0  0
    0.5551    5.5028   -1.3883 H   0  0  0  0  0  0  0  0  0  0  0  0
    0.9594  -10.2419    2.1453 H   0  0  0  0  0  0  0  0  0  0  0  0
   -0.8868  -11.1911    3.7058 H   0  0  0  0  0  0  0  0  0  0  0  0
   -1.6693   -9.3296    5.1760 H   0  0  0  0  0  0  0  0  0  0  0  0
  1  2  1  0  0  0  0
  1 32  1  0  0  0  0
  1 33  1  0  0  0  0
  2  3  1  0  0  0  0
  2 11  1  0  0  0  0
  2 34  1  1  0  0  0
  3  4  1  0  0  0  0
  3  9  1  0  0  0  0
  3 35  1  6  0  0  0
  4  5  1  0  0  0  0
  4 10  1  0  0  0  0
  4 36  1  1  0  0  0
  5  6  1  0  0  0  0
  5 37  1  0  0  0  0
  5 38  1  0  0  0  0
  6  1  1  0  0  0  0
  6  7  2  0  0  0  0
  6  8  2  0  0  0  0
  9 39  1  0  0  0  0
 10 12  1  0  0  0  0
 10 40  1  0  0  0  0
 11 19  1  0  0  0  0
 11 41  1  0  0  0  0
 11 42  1  0  0  0  0
 12 13  1  0  0  0  0
 12 43  1  0  0  0  0
 12 44  1  0  0  0  0
 13 14  2  0  0  0  0
 14 15  1  0  0  0  0
 14 45  1  0  0  0  0
 15 16  2  0  0  0  0
 15 25  1  0  0  0  0
 16 17  1  0  0  0  0
 16 46  1  0  0  0  0
 17 18  2  0  0  0  0
 17 47  1  0  0  0  0
 18 13  1  0  0  0  0
 18 48  1  0  0  0  0
 19 20  2  0  0  0  0
 20 21  1  0  0  0  0
 20 49  1  0  0  0  0
 21 22  2  0  0  0  0
 21 29  1  0  0  0  0
 22 23  1  0  0  0  0
 23 24  2  0  0  0  0
 23 50  1  0  0  0  0
 24 19  1  0  0  0  0
 24 51  1  0  0  0  0
 25 26  1  0  0  0  0
 25 27  1  0  0  0  0
 25 28  1  0  0  0  0
 26 52  1  0  0  0  0
 26 53  1  0  0  0  0
 26 54  1  0  0  0  0
 27 55  1  0  0  0  0
 27 56  1  0  0  0  0
 27 57  1  0  0  0  0
 28 58  1  0  0  0  0
 28 59  1  0  0  0  0
 28 60  1  0  0  0  0
 29 30  2  0  0  0  0
 29 61  1  0  0  0  0
 30 31  1  0  0  0  0
 30 62  1  0  0  0  0
 31 22  1  0  0  0  0
 31 63  1  0  0  0  0
M  END
$$$$
Dataset (33)
 OpenBabel02101614293D

 69 72  0  0  0  0  0  0  0  0999 V2000
   -3.3238   -7.5194    5.3343 C   0  0  0  0  0  0  0  0  0  0  0  0
   -4.8565   -7.8023    5.2462 C   0  0  2  0  0  0  0  0  0  0  0  0
   -5.5190   -7.8347    6.6775 C   0  0  1  0  0  0  0  0  0  0  0  0
   -5.4175   -6.4959    7.4967 C   0  0  2  0  0  0  0  0  0  0  0  0
   -3.9447   -6.0973    7.8026 C   0  0  0  0  0  0  0  0  0  0  0  0
   -2.9812   -5.9843    6.2564 S   0  0  0  0  0  0  0  0  0  0  0  0
   -1.4141   -5.8726    6.5750 O   0  0  0  0  0  0  0  0  0  0  0  0
   -3.4703   -4.7230    5.3949 O   0  0  0  0  0  0  0  0  0  0  0  0
   -6.9033   -8.1716    6.5470 O   0  0  0  0  0  0  0  0  0  0  0  0
   -6.1833   -6.6350    8.7715 N   0  0  0  0  0  0  0  0  0  0  0  0
   -5.1136   -9.1182    4.4243 C   0  0  0  0  0  0  0  0  0  0  0  0
   -6.4723   -5.3888    9.5275 C   0  0  0  0  0  0  0  0  0  0  0  0
   -7.2896   -5.6855   10.7329 C   0  0  0  0  0  0  0  0  0  0  0  0
   -8.6910   -5.5045   10.7191 C   0  0  0  0  0  0  0  0  0  0  0  0
   -9.5056   -5.7181   11.8661 C   0  0  0  0  0  0  0  0  0  0  0  0
   -8.8368   -6.1530   13.0435 C   0  0  0  0  0  0  0  0  0  0  0  0
   -7.4492   -6.3671   13.0749 C   0  0  0  0  0  0  0  0  0  0  0  0
   -6.6815   -6.1338   11.9250 C   0  0  0  0  0  0  0  0  0  0  0  0
   -4.5968   -9.0480    3.0209 C   0  0  0  0  0  0  0  0  0  0  0  0
   -3.2823   -9.4944    2.7202 C   0  0  0  0  0  0  0  0  0  0  0  0
   -2.7057   -9.2615    1.4560 C   0  0  0  0  0  0  0  0  0  0  0  0
   -3.5503   -8.6210    0.4539 C   0  0  0  0  0  0  0  0  0  0  0  0
   -4.8774   -8.2476    0.6986 C   0  0  0  0  0  0  0  0  0  0  0  0
   -5.3870   -8.4595    1.9960 C   0  0  0  0  0  0  0  0  0  0  0  0
  -11.0081   -5.4804   11.7871 C   0  0  0  0  0  0  0  0  0  0  0  0
  -11.7775   -5.7105   13.1369 C   0  0  0  0  0  0  0  0  0  0  0  0
  -11.6276   -6.4645   10.7361 C   0  0  0  0  0  0  0  0  0  0  0  0
  -11.2740   -3.9935   11.3646 C   0  0  0  0  0  0  0  0  0  0  0  0
   -1.3302   -9.5671    1.1087 C   0  0  0  0  0  0  0  0  0  0  0  0
   -1.4780   -9.0180   -0.2555 C   0  0  0  0  0  0  0  0  0  0  0  0
   -2.7325   -8.4922   -0.6158 N   0  0  0  0  0  0  0  0  0  0  0  0
   -0.1865  -10.1464    1.8354 C   0  0  0  0  0  0  0  0  0  0  0  0
   -0.2268  -11.6906    1.8677 C   0  0  0  0  0  0  0  0  0  0  0  0
   -2.8154   -8.3456    5.8354 H   0  0  0  0  0  0  0  0  0  0  0  0
   -2.8850   -7.3847    4.3467 H   0  0  0  0  0  0  0  0  0  0  0  0
   -5.3192   -6.9766    4.6934 H   0  0  0  0  0  0  0  0  0  0  0  0
   -5.0509   -8.6350    7.2579 H   0  0  0  0  0  0  0  0  0  0  0  0
   -5.8792   -5.7026    6.8975 H   0  0  0  0  0  0  0  0  0  0  0  0
   -3.8857   -5.1231    8.2887 H   0  0  0  0  0  0  0  0  0  0  0  0
   -3.4859   -6.8455    8.4535 H   0  0  0  0  0  0  0  0  0  0  0  0
   -7.2137   -8.3552    7.4591 H   0  0  0  0  0  0  0  0  0  0  0  0
   -5.6578   -7.2609    9.3867 H   0  0  0  0  0  0  0  0  0  0  0  0
   -4.6595   -9.9627    4.9514 H   0  0  0  0  0  0  0  0  0  0  0  0
   -6.1865   -9.3258    4.3902 H   0  0  0  0  0  0  0  0  0  0  0  0
   -5.5491   -4.9002    9.8449 H   0  0  0  0  0  0  0  0  0  0  0  0
   -6.9972   -4.6819    8.8784 H   0  0  0  0  0  0  0  0  0  0  0  0
   -9.1213   -5.2029    9.8426 H   0  0  0  0  0  0  0  0  0  0  0  0
   -9.3419   -6.3326   13.9093 H   0  0  0  0  0  0  0  0  0  0  0  0
   -6.9989   -6.6898   13.9360 H   0  0  0  0  0  0  0  0  0  0  0  0
   -5.6723   -6.2832   11.9670 H   0  0  0  0  0  0  0  0  0  0  0  0
   -2.7260   -9.9511    3.4461 H   0  0  0  0  0  0  0  0  0  0  0  0
   -5.4484   -7.8157   -0.0309 H   0  0  0  0  0  0  0  0  0  0  0  0
   -6.3458   -8.1598    2.1982 H   0  0  0  0  0  0  0  0  0  0  0  0
  -12.8488   -5.5231   13.0256 H   0  0  0  0  0  0  0  0  0  0  0  0
  -11.6616   -6.7396   13.4830 H   0  0  0  0  0  0  0  0  0  0  0  0
  -11.4058   -5.0405   13.9150 H   0  0  0  0  0  0  0  0  0  0  0  0
  -12.7127   -6.3574   10.6779 H   0  0  0  0  0  0  0  0  0  0  0  0
  -11.4042   -7.5004   11.0036 H   0  0  0  0  0  0  0  0  0  0  0  0
  -11.2344   -6.2852    9.7351 H   0  0  0  0  0  0  0  0  0  0  0  0
  -12.3417   -3.7658   11.3454 H   0  0  0  0  0  0  0  0  0  0  0  0
  -10.8872   -3.7808   10.3678 H   0  0  0  0  0  0  0  0  0  0  0  0
  -10.7916   -3.3065   12.0647 H   0  0  0  0  0  0  0  0  0  0  0  0
   -0.7245   -8.9647   -1.0081 H   0  0  0  0  0  0  0  0  0  0  0  0
   -2.9597   -8.0952   -1.4719 H   0  0  0  0  0  0  0  0  0  0  0  0
    0.7396   -9.8140    1.3586 H   0  0  0  0  0  0  0  0  0  0  0  0
   -0.1972   -9.7558    2.8558 H   0  0  0  0  0  0  0  0  0  0  0  0
   -0.1095  -12.2062    0.5988 F   0  0  0  0  0  0  0  0  0  0  0  0
    0.8246  -12.1588    2.6176 F   0  0  0  0  0  0  0  0  0  0  0  0
   -1.1562  -12.0477    2.3158 H   0  0  0  0  0  0  0  0  0  0  0  0
  1  2  1  0  0  0  0
  1 34  1  0  0  0  0
  1 35  1  0  0  0  0
  2  3  1  0  0  0  0
  2 11  1  0  0  0  0
  2 36  1  6  0  0  0
  3  4  1  0  0  0  0
  3  9  1  0  0  0  0
  3 37  1  1  0  0  0
  4  5  1  0  0  0  0
  4 10  1  0  0  0  0
  4 38  1  6  0  0  0
  5  6  1  0  0  0  0
  5 39  1  0  0  0  0
  5 40  1  0  0  0  0
  6  1  1  0  0  0  0
  6  7  2  0  0  0  0
  6  8  2  0  0  0  0
  9 41  1  0  0  0  0
 10 12  1  0  0  0  0
 10 42  1  0  0  0  0
 11 19  1  0  0  0  0
 11 43  1  0  0  0  0
 11 44  1  0  0  0  0
 12 13  1  0  0  0  0
 12 45  1  0  0  0  0
 12 46  1  0  0  0  0
 13 14  2  0  0  0  0
 14 15  1  0  0  0  0
 14 47  1  0  0  0  0
 15 16  2  0  0  0  0
 15 25  1  0  0  0  0
 16 17  1  0  0  0  0
 16 48  1  0  0  0  0
 17 18  2  0  0  0  0
 17 49  1  0  0  0  0
 18 13  1  0  0  0  0
 18 50  1  0  0  0  0
 19 20  2  0  0  0  0
 20 21  1  0  0  0  0
 20 51  1  0  0  0  0
 21 22  2  0  0  0  0
 21 29  1  0  0  0  0
 22 23  1  0  0  0  0
 23 24  2  0  0  0  0
 23 52  1  0  0  0  0
 24 19  1  0  0  0  0
 24 53  1  0  0  0  0
 25 26  1  0  0  0  0
 25 27  1  0  0  0  0
 25 28  1  0  0  0  0
 26 54  1  0  0  0  0
 26 55  1  0  0  0  0
 26 56  1  0  0  0  0
 27 57  1  0  0  0  0
 27 58  1  0  0  0  0
 27 59  1  0  0  0  0
 28 60  1  0  0  0  0
 28 61  1  0  0  0  0
 28 62  1  0  0  0  0
 29 30  2  0  0  0  0
 29 32  1  0  0  0  0
 30 31  1  0  0  0  0
 30 63  1  0  0  0  0
 31 22  1  0  0  0  0
 31 64  1  0  0  0  0
 32 33  1  0  0  0  0
 32 65  1  0  0  0  0
 32 66  1  0  0  0  0
 33 67  1  0  0  0  0
 33 68  1  0  0  0  0
 33 69  1  0  0  0  0
M  END
$$$$
Dataset (34)
 OpenBabel02101614293D

 69 72  0  0  0  0  0  0  0  0999 V2000
    0.6631   -5.2747    0.2231 C   0  0  0  0  0  0  0  0  0  0  0  0
    1.0429   -4.2134    1.3033 C   0  0  2  0  0  0  0  0  0  0  0  0
    1.7574   -2.9655    0.6570 C   0  0  1  0  0  0  0  0  0  0  0  0
    0.8920   -2.1644   -0.3825 C   0  0  2  0  0  0  0  0  0  0  0  0
    0.5085   -3.0227   -1.6229 C   0  0  0  0  0  0  0  0  0  0  0  0
   -0.3569   -4.5422   -1.0982 S   0  0  0  0  0  0  0  0  0  0  0  0
   -0.4886   -5.5659   -2.3247 O   0  0  0  0  0  0  0  0  0  0  0  0
   -1.8054   -4.1777   -0.5155 O   0  0  0  0  0  0  0  0  0  0  0  0
    2.1575   -2.0659    1.6950 O   0  0  0  0  0  0  0  0  0  0  0  0
    1.6405   -0.9482   -0.8149 N   0  0  0  0  0  0  0  0  0  0  0  0
    1.8973   -4.8835    2.4392 C   0  0  0  0  0  0  0  0  0  0  0  0
    0.8745    0.0843   -1.5574 C   0  0  0  0  0  0  0  0  0  0  0  0
    1.7436    1.2461   -1.8729 C   0  0  0  0  0  0  0  0  0  0  0  0
    1.7277    2.3996   -1.0586 C   0  0  0  0  0  0  0  0  0  0  0  0
    2.4944    3.5600   -1.3561 C   0  0  0  0  0  0  0  0  0  0  0  0
    3.3126    3.4984   -2.5173 C   0  0  0  0  0  0  0  0  0  0  0  0
    3.3683    2.3508   -3.3243 C   0  0  0  0  0  0  0  0  0  0  0  0
    2.5877    1.2302   -3.0036 C   0  0  0  0  0  0  0  0  0  0  0  0
    1.1763   -5.9897    3.1420 C   0  0  0  0  0  0  0  0  0  0  0  0
    1.3039   -7.3261    2.6797 C   0  0  0  0  0  0  0  0  0  0  0  0
    0.4999   -8.3577    3.2041 C   0  0  0  0  0  0  0  0  0  0  0  0
   -0.4115   -8.0018    4.2861 C   0  0  0  0  0  0  0  0  0  0  0  0
   -0.5012   -6.7074    4.8105 C   0  0  0  0  0  0  0  0  0  0  0  0
    0.2966   -5.7052    4.2216 C   0  0  0  0  0  0  0  0  0  0  0  0
    2.4090    4.7787   -0.4464 C   0  0  0  0  0  0  0  0  0  0  0  0
    3.2735    6.0035   -0.9138 C   0  0  0  0  0  0  0  0  0  0  0  0
    2.9096    4.3867    0.9865 C   0  0  0  0  0  0  0  0  0  0  0  0
    0.9214    5.2713   -0.3852 C   0  0  0  0  0  0  0  0  0  0  0  0
    0.4878   -9.7223    2.7106 C   0  0  0  0  0  0  0  0  0  0  0  0
   -0.5673  -10.1336    3.6609 C   0  0  0  0  0  0  0  0  0  0  0  0
   -1.0651   -9.1591    4.5461 N   0  0  0  0  0  0  0  0  0  0  0  0
    1.2034  -10.4322    1.6367 C   0  0  0  0  0  0  0  0  0  0  0  0
    2.5982  -10.9433    2.0736 C   0  0  0  0  0  0  0  0  0  0  0  0
    1.5639   -5.6966   -0.2276 H   0  0  0  0  0  0  0  0  0  0  0  0
    0.0702   -6.0827    0.6488 H   0  0  0  0  0  0  0  0  0  0  0  0
    0.1150   -3.8550    1.7641 H   0  0  0  0  0  0  0  0  0  0  0  0
    2.6715   -3.3071    0.1622 H   0  0  0  0  0  0  0  0  0  0  0  0
   -0.0255   -1.8448    0.1242 H   0  0  0  0  0  0  0  0  0  0  0  0
   -0.1664   -2.4864   -2.2908 H   0  0  0  0  0  0  0  0  0  0  0  0
    1.4096   -3.2968   -2.1783 H   0  0  0  0  0  0  0  0  0  0  0  0
    2.7481   -1.4141    1.2624 H   0  0  0  0  0  0  0  0  0  0  0  0
    2.4158   -1.2507   -1.4084 H   0  0  0  0  0  0  0  0  0  0  0  0
    2.8319   -5.2554    2.0091 H   0  0  0  0  0  0  0  0  0  0  0  0
    2.1828   -4.1312    3.1784 H   0  0  0  0  0  0  0  0  0  0  0  0
    0.4783   -0.3129   -2.4940 H   0  0  0  0  0  0  0  0  0  0  0  0
    0.0172    0.4031   -0.9576 H   0  0  0  0  0  0  0  0  0  0  0  0
    1.1328    2.3860   -0.2278 H   0  0  0  0  0  0  0  0  0  0  0  0
    3.8937    4.2862   -2.8011 H   0  0  0  0  0  0  0  0  0  0  0  0
    3.9775    2.3353   -4.1471 H   0  0  0  0  0  0  0  0  0  0  0  0
    2.6325    0.4061   -3.6072 H   0  0  0  0  0  0  0  0  0  0  0  0
    1.9561   -7.5413    1.9212 H   0  0  0  0  0  0  0  0  0  0  0  0
   -1.1380   -6.4929    5.5809 H   0  0  0  0  0  0  0  0  0  0  0  0
    0.2212   -4.7481    4.5775 H   0  0  0  0  0  0  0  0  0  0  0  0
    3.1720    6.8497   -0.2292 H   0  0  0  0  0  0  0  0  0  0  0  0
    4.3330    5.7424   -0.9555 H   0  0  0  0  0  0  0  0  0  0  0  0
    2.9634    6.3424   -1.9045 H   0  0  0  0  0  0  0  0  0  0  0  0
    2.9048    5.2454    1.6619 H   0  0  0  0  0  0  0  0  0  0  0  0
    3.9296    3.9965    0.9428 H   0  0  0  0  0  0  0  0  0  0  0  0
    2.2777    3.6214    1.4379 H   0  0  0  0  0  0  0  0  0  0  0  0
    0.8222    6.1765    0.2182 H   0  0  0  0  0  0  0  0  0  0  0  0
    0.2657    4.5212    0.0581 H   0  0  0  0  0  0  0  0  0  0  0  0
    0.5507    5.4886   -1.3903 H   0  0  0  0  0  0  0  0  0  0  0  0
   -1.0112  -11.1005    3.7457 H   0  0  0  0  0  0  0  0  0  0  0  0
   -1.7602   -9.2906    5.2102 H   0  0  0  0  0  0  0  0  0  0  0  0
    0.5914  -11.2808    1.3207 H   0  0  0  0  0  0  0  0  0  0  0  0
    1.3033   -9.7541    0.7855 H   0  0  0  0  0  0  0  0  0  0  0  0
    2.5235  -11.8541    3.1035 F   0  0  0  0  0  0  0  0  0  0  0  0
    3.3638   -9.8726    2.4766 F   0  0  0  0  0  0  0  0  0  0  0  0
    3.2363  -11.5464    1.0168 F   0  0  0  0  0  0  0  0  0  0  0  0
  1  2  1  0  0  0  0
  1 34  1  0  0  0  0
  1 35  1  0  0  0  0
  2  3  1  0  0  0  0
  2 11  1  0  0  0  0
  2 36  1  1  0  0  0
  3  4  1  0  0  0  0
  3  9  1  0  0  0  0
  3 37  1  6  0  0  0
  4  5  1  0  0  0  0
  4 10  1  0  0  0  0
  4 38  1  1  0  0  0
  5  6  1  0  0  0  0
  5 39  1  0  0  0  0
  5 40  1  0  0  0  0
  6  1  1  0  0  0  0
  6  7  2  0  0  0  0
  6  8  2  0  0  0  0
  9 41  1  0  0  0  0
 10 12  1  0  0  0  0
 10 42  1  0  0  0  0
 11 19  1  0  0  0  0
 11 43  1  0  0  0  0
 11 44  1  0  0  0  0
 12 13  1  0  0  0  0
 12 45  1  0  0  0  0
 12 46  1  0  0  0  0
 13 14  2  0  0  0  0
 14 15  1  0  0  0  0
 14 47  1  0  0  0  0
 15 16  2  0  0  0  0
 15 25  1  0  0  0  0
 16 17  1  0  0  0  0
 16 48  1  0  0  0  0
 17 18  2  0  0  0  0
 17 49  1  0  0  0  0
 18 13  1  0  0  0  0
 18 50  1  0  0  0  0
 19 20  2  0  0  0  0
 20 21  1  0  0  0  0
 20 51  1  0  0  0  0
 21 22  2  0  0  0  0
 21 29  1  0  0  0  0
 22 23  1  0  0  0  0
 23 24  2  0  0  0  0
 23 52  1  0  0  0  0
 24 19  1  0  0  0  0
 24 53  1  0  0  0  0
 25 26  1  0  0  0  0
 25 27  1  0  0  0  0
 25 28  1  0  0  0  0
 26 54  1  0  0  0  0
 26 55  1  0  0  0  0
 26 56  1  0  0  0  0
 27 57  1  0  0  0  0
 27 58  1  0  0  0  0
 27 59  1  0  0  0  0
 28 60  1  0  0  0  0
 28 61  1  0  0  0  0
 28 62  1  0  0  0  0
 29 30  2  0  0  0  0
 29 32  1  0  0  0  0
 30 31  1  0  0  0  0
 30 63  1  0  0  0  0
 31 22  1  0  0  0  0
 31 64  1  0  0  0  0
 32 33  1  0  0  0  0
 32 65  1  0  0  0  0
 32 66  1  0  0  0  0
 33 67  1  0  0  0  0
 33 68  1  0  0  0  0
 33 69  1  0  0  0  0
M  END
$$$$
Dataset (35)
 OpenBabel02101614293D

 69 72  0  0  0  0  0  0  0  0999 V2000
    2.5081  -10.8699    2.1339 C   0  0  0  0  0  0  0  0  0  0  0  0
    0.6760   -5.2556    0.2257 C   0  0  0  0  0  0  0  0  0  0  0  0
    1.0590   -4.1978    1.3096 C   0  0  2  0  0  0  0  0  0  0  0  0
    1.7681   -2.9499    0.6612 C   0  0  1  0  0  0  0  0  0  0  0  0
    0.8952   -2.1496   -0.3717 C   0  0  2  0  0  0  0  0  0  0  0  0
    0.5130   -3.0073   -1.6135 C   0  0  0  0  0  0  0  0  0  0  0  0
   -0.3449   -4.5273   -1.0940 S   0  0  0  0  0  0  0  0  0  0  0  0
   -0.4726   -5.5509   -2.3205 O   0  0  0  0  0  0  0  0  0  0  0  0
   -1.7936   -4.1695   -0.5073 O   0  0  0  0  0  0  0  0  0  0  0  0
    2.1753   -2.0550    1.6998 O   0  0  0  0  0  0  0  0  0  0  0  0
    1.6310   -0.9261   -0.7971 N   0  0  0  0  0  0  0  0  0  0  0  0
    1.9215   -4.8638    2.4426 C   0  0  0  0  0  0  0  0  0  0  0  0
    0.8657    0.0886   -1.5590 C   0  0  0  0  0  0  0  0  0  0  0  0
    1.7404    1.2393   -1.8801 C   0  0  0  0  0  0  0  0  0  0  0  0
    1.7327    2.3927   -1.0661 C   0  0  0  0  0  0  0  0  0  0  0  0
    2.4986    3.5532   -1.3633 C   0  0  0  0  0  0  0  0  0  0  0  0
    3.3118    3.4926   -2.5275 C   0  0  0  0  0  0  0  0  0  0  0  0
    3.3626    2.3386   -3.3309 C   0  0  0  0  0  0  0  0  0  0  0  0
    2.5843    1.2143   -3.0105 C   0  0  0  0  0  0  0  0  0  0  0  0
    1.2169   -5.9937    3.1189 C   0  0  0  0  0  0  0  0  0  0  0  0
    1.3774   -7.3196    2.6383 C   0  0  0  0  0  0  0  0  0  0  0  0
    0.5609   -8.3401    3.1587 C   0  0  0  0  0  0  0  0  0  0  0  0
   -0.3377   -8.0844    4.1928 C   0  0  0  0  0  0  0  0  0  0  0  0
   -0.4626   -6.7983    4.7408 C   0  0  0  0  0  0  0  0  0  0  0  0
    0.3118   -5.7531    4.1893 C   0  0  0  0  0  0  0  0  0  0  0  0
    2.4082    4.7698   -0.4492 C   0  0  0  0  0  0  0  0  0  0  0  0
    3.2718    5.9984   -0.9159 C   0  0  0  0  0  0  0  0  0  0  0  0
    2.9051    4.3744    0.9869 C   0  0  0  0  0  0  0  0  0  0  0  0
    0.9153    5.2548   -0.3868 C   0  0  0  0  0  0  0  0  0  0  0  0
    0.4096   -9.6778    2.7966 C   0  0  0  0  0  0  0  0  0  0  0  0
   -0.5688  -10.1909    3.6534 C   0  0  0  0  0  0  0  0  0  0  0  0
   -0.9947   -9.2201    4.4818 N   0  0  0  0  0  0  0  0  0  0  0  0
    1.1048  -10.3962    1.7054 C   0  0  0  0  0  0  0  0  0  0  0  0
    2.4300  -11.5742    2.9639 H   0  0  0  0  0  0  0  0  0  0  0  0
    2.9984  -11.3706    1.2982 H   0  0  0  0  0  0  0  0  0  0  0  0
    3.1225  -10.0225    2.4420 H   0  0  0  0  0  0  0  0  0  0  0  0
    1.5748   -5.6830   -0.2256 H   0  0  0  0  0  0  0  0  0  0  0  0
    0.0733   -6.0575    0.6470 H   0  0  0  0  0  0  0  0  0  0  0  0
    0.1346   -3.8411    1.7777 H   0  0  0  0  0  0  0  0  0  0  0  0
    2.6781   -3.2895    0.1583 H   0  0  0  0  0  0  0  0  0  0  0  0
   -0.0200   -1.8367    0.1408 H   0  0  0  0  0  0  0  0  0  0  0  0
   -0.1687   -2.4815   -2.2780 H   0  0  0  0  0  0  0  0  0  0  0  0
    1.4082   -3.2767   -2.1770 H   0  0  0  0  0  0  0  0  0  0  0  0
    2.7698   -1.4057    1.2684 H   0  0  0  0  0  0  0  0  0  0  0  0
    2.4186   -1.2231   -1.3742 H   0  0  0  0  0  0  0  0  0  0  0  0
    2.1913   -4.1228    3.2001 H   0  0  0  0  0  0  0  0  0  0  0  0
    2.8633   -5.2136    2.0110 H   0  0  0  0  0  0  0  0  0  0  0  0
    0.4807   -0.3176   -2.4949 H   0  0  0  0  0  0  0  0  0  0  0  0
    0.0040    0.4092   -0.9682 H   0  0  0  0  0  0  0  0  0  0  0  0
    1.1461    2.3776   -0.2309 H   0  0  0  0  0  0  0  0  0  0  0  0
    3.8804    4.2903   -2.8158 H   0  0  0  0  0  0  0  0  0  0  0  0
    3.9674    2.3207   -4.1545 H   0  0  0  0  0  0  0  0  0  0  0  0
    2.6324    0.3821   -3.6091 H   0  0  0  0  0  0  0  0  0  0  0  0
    2.0402   -7.5308    1.8875 H   0  0  0  0  0  0  0  0  0  0  0  0
   -1.1139   -6.6222    5.5080 H   0  0  0  0  0  0  0  0  0  0  0  0
    0.1999   -4.8088    4.5664 H   0  0  0  0  0  0  0  0  0  0  0  0
    3.1660    6.8408   -0.2272 H   0  0  0  0  0  0  0  0  0  0  0  0
    4.3334    5.7412   -0.9580 H   0  0  0  0  0  0  0  0  0  0  0  0
    2.9605    6.3430   -1.9052 H   0  0  0  0  0  0  0  0  0  0  0  0
    2.9001    5.2346    1.6609 H   0  0  0  0  0  0  0  0  0  0  0  0
    3.9251    3.9816    0.9459 H   0  0  0  0  0  0  0  0  0  0  0  0
    2.2710    3.6088    1.4387 H   0  0  0  0  0  0  0  0  0  0  0  0
    0.8147    6.1586    0.2178 H   0  0  0  0  0  0  0  0  0  0  0  0
    0.2599    4.5016    0.0555 H   0  0  0  0  0  0  0  0  0  0  0  0
    0.5416    5.4731   -1.3910 H   0  0  0  0  0  0  0  0  0  0  0  0
   -0.9181  -11.1528    3.6473 H   0  0  0  0  0  0  0  0  0  0  0  0
   -1.6781   -9.3256    5.1649 H   0  0  0  0  0  0  0  0  0  0  0  0
    0.5163  -11.2645    1.4005 H   0  0  0  0  0  0  0  0  0  0  0  0
    1.1875   -9.7373    0.8369 H   0  0  0  0  0  0  0  0  0  0  0  0
  1 34  1  0  0  0  0
  1 35  1  0  0  0  0
  1 36  1  0  0  0  0
  2  3  1  0  0  0  0
  2 37  1  0  0  0  0
  2 38  1  0  0  0  0
  3  4  1  0  0  0  0
  3 12  1  0  0  0  0
  3 39  1  1  0  0  0
  4  5  1  0  0  0  0
  4 10  1  0  0  0  0
  4 40  1  6  0  0  0
  5  6  1  0  0  0  0
  5 11  1  0  0  0  0
  5 41  1  1  0  0  0
  6  7  1  0  0  0  0
  6 42  1  0  0  0  0
  6 43  1  0  0  0  0
  7  2  1  0  0  0  0
  7  8  2  0  0  0  0
  7  9  2  0  0  0  0
 10 44  1  0  0  0  0
 11 13  1  0  0  0  0
 11 45  1  0  0  0  0
 12 20  1  0  0  0  0
 12 46  1  0  0  0  0
 12 47  1  0  0  0  0
 13 14  1  0  0  0  0
 13 48  1  0  0  0  0
 13 49  1  0  0  0  0
 14 15  2  0  0  0  0
 15 16  1  0  0  0  0
 15 50  1  0  0  0  0
 16 17  2  0  0  0  0
 16 26  1  0  0  0  0
 17 18  1  0  0  0  0
 17 51  1  0  0  0  0
 18 19  2  0  0  0  0
 18 52  1  0  0  0  0
 19 14  1  0  0  0  0
 19 53  1  0  0  0  0
 20 21  2  0  0  0  0
 21 22  1  0  0  0  0
 21 54  1  0  0  0  0
 22 23  2  0  0  0  0
 22 30  1  0  0  0  0
 23 24  1  0  0  0  0
 24 25  2  0  0  0  0
 24 55  1  0  0  0  0
 25 20  1  0  0  0  0
 25 56  1  0  0  0  0
 26 27  1  0  0  0  0
 26 28  1  0  0  0  0
 26 29  1  0  0  0  0
 27 57  1  0  0  0  0
 27 58  1  0  0  0  0
 27 59  1  0  0  0  0
 28 60  1  0  0  0  0
 28 61  1  0  0  0  0
 28 62  1  0  0  0  0
 29 63  1  0  0  0  0
 29 64  1  0  0  0  0
 29 65  1  0  0  0  0
 30 31  2  0  0  0  0
 30 33  1  0  0  0  0
 31 32  1  0  0  0  0
 31 66  1  0  0  0  0
 32 23  1  0  0  0  0
 32 67  1  0  0  0  0
 33  1  1  0  0  0  0
 33 68  1  0  0  0  0
 33 69  1  0  0  0  0
M  END
$$$$
Dataset (36)
 OpenBabel02101614293D

 78 82  0  0  0  0  0  0  0  0999 V2000
    0.6505    6.7200    0.7993 C   0  0  0  0  0  0  0  0  0  0  0  0
    0.6448    5.7304   -0.4089 C   0  0  2  0  0  0  0  0  0  0  0  0
    1.5460    4.4694   -0.1318 C   0  0  1  0  0  0  0  0  0  0  0  0
    1.1058    3.5958    1.0971 C   0  0  2  0  0  0  0  0  0  0  0  0
    1.1621    4.3760    2.4405 C   0  0  0  0  0  0  0  0  0  0  0  0
    0.1585    5.8943    2.3461 S   0  0  0  0  0  0  0  0  0  0  0  0
    0.4504    6.8564    3.5938 O   0  0  0  0  0  0  0  0  0  0  0  0
   -1.3994    5.5232    2.2761 O   0  0  0  0  0  0  0  0  0  0  0  0
    1.5495    3.6308   -1.2895 O   0  0  0  0  0  0  0  0  0  0  0  0
    1.9769    2.3859    1.1798 N   0  0  0  0  0  0  0  0  0  0  0  0
    1.0470    6.4891   -1.7240 C   0  0  0  0  0  0  0  0  0  0  0  0
    1.5071    1.2755    2.0462 C   0  0  0  0  0  0  0  0  0  0  0  0
    2.4291    0.1149    1.9445 C   0  0  0  0  0  0  0  0  0  0  0  0
    2.1319   -0.9869    1.1100 C   0  0  0  0  0  0  0  0  0  0  0  0
    2.9703   -2.1335    1.0197 C   0  0  0  0  0  0  0  0  0  0  0  0
    4.1565   -2.1139    1.8038 C   0  0  0  0  0  0  0  0  0  0  0  0
    4.4798   -1.0228    2.6256 C   0  0  0  0  0  0  0  0  0  0  0  0
    3.6221    0.0838    2.6966 C   0  0  0  0  0  0  0  0  0  0  0  0
    0.1186    7.6171   -2.0223 C   0  0  0  0  0  0  0  0  0  0  0  0
    0.4165    8.9268   -1.5698 C   0  0  0  0  0  0  0  0  0  0  0  0
   -0.5473    9.9482   -1.6866 C   0  0  0  0  0  0  0  0  0  0  0  0
   -1.7584    9.6850   -2.3183 C   0  0  0  0  0  0  0  0  0  0  0  0
   -2.0637    8.4134   -2.8285 C   0  0  0  0  0  0  0  0  0  0  0  0
   -1.1221    7.3770   -2.6649 C   0  0  0  0  0  0  0  0  0  0  0  0
    2.5771   -3.2980    0.1200 C   0  0  0  0  0  0  0  0  0  0  0  0
    3.5653   -4.5177    0.1699 C   0  0  0  0  0  0  0  0  0  0  0  0
    2.5379   -2.8058   -1.3667 C   0  0  0  0  0  0  0  0  0  0  0  0
    1.1711   -3.8469    0.5481 C   0  0  0  0  0  0  0  0  0  0  0  0
   -0.4960   11.3393   -1.1764 C   0  0  0  0  0  0  0  0  0  0  0  0
   -1.8856   11.8780   -1.6882 C   0  0  0  0  0  0  0  0  0  0  0  0
   -2.5149   10.7799   -2.3215 N   0  0  0  0  0  0  0  0  0  0  0  0
   -3.2044    8.1933   -3.4217 F   0  0  0  0  0  0  0  0  0  0  0  0
    0.7295   12.1086   -1.7824 C   0  0  0  0  0  0  0  0  0  0  0  0
    0.8868   13.5365   -1.1909 C   0  0  0  0  0  0  0  0  0  0  0  0
    0.9506   13.5249    0.3627 C   0  0  0  0  0  0  0  0  0  0  0  0
   -0.2480   12.7575    0.9869 C   0  0  0  0  0  0  0  0  0  0  0  0
   -0.4165   11.3327    0.3909 C   0  0  0  0  0  0  0  0  0  0  0  0
    2.1329   12.9533    0.7792 F   0  0  0  0  0  0  0  0  0  0  0  0
    0.9494   14.8223    0.8257 F   0  0  0  0  0  0  0  0  0  0  0  0
    1.6487    7.1427    0.9289 H   0  0  0  0  0  0  0  0  0  0  0  0
   -0.0606    7.5337    0.6594 H   0  0  0  0  0  0  0  0  0  0  0  0
   -0.3803    5.3668   -0.5422 H   0  0  0  0  0  0  0  0  0  0  0  0
    2.5760    4.8007    0.0197 H   0  0  0  0  0  0  0  0  0  0  0  0
    0.0732    3.2740    0.9215 H   0  0  0  0  0  0  0  0  0  0  0  0
    0.7692    3.7810    3.2636 H   0  0  0  0  0  0  0  0  0  0  0  0
    2.1920    4.6565    2.6629 H   0  0  0  0  0  0  0  0  0  0  0  0
    2.2354    2.9508   -1.1184 H   0  0  0  0  0  0  0  0  0  0  0  0
    2.8948    2.6849    1.5200 H   0  0  0  0  0  0  0  0  0  0  0  0
    2.0740    6.8561   -1.6300 H   0  0  0  0  0  0  0  0  0  0  0  0
    1.0424    5.8010   -2.5734 H   0  0  0  0  0  0  0  0  0  0  0  0
    1.4551    1.5934    3.0899 H   0  0  0  0  0  0  0  0  0  0  0  0
    0.4979    0.9816    1.7480 H   0  0  0  0  0  0  0  0  0  0  0  0
    1.2740   -0.9467    0.5572 H   0  0  0  0  0  0  0  0  0  0  0  0
    4.8130   -2.8941    1.7972 H   0  0  0  0  0  0  0  0  0  0  0  0
    5.3391   -1.0349    3.1806 H   0  0  0  0  0  0  0  0  0  0  0  0
    3.8719    0.8635    3.3096 H   0  0  0  0  0  0  0  0  0  0  0  0
    1.3096    9.1221   -1.1135 H   0  0  0  0  0  0  0  0  0  0  0  0
   -1.3512    6.4393   -3.0026 H   0  0  0  0  0  0  0  0  0  0  0  0
    3.2367   -5.3266   -0.4879 H   0  0  0  0  0  0  0  0  0  0  0  0
    4.5662   -4.2214   -0.1526 H   0  0  0  0  0  0  0  0  0  0  0  0
    3.6308   -4.9227    1.1831 H   0  0  0  0  0  0  0  0  0  0  0  0
    2.3007   -3.6269   -2.0474 H   0  0  0  0  0  0  0  0  0  0  0  0
    3.5092   -2.3959   -1.6560 H   0  0  0  0  0  0  0  0  0  0  0  0
    1.7856   -2.0294   -1.5177 H   0  0  0  0  0  0  0  0  0  0  0  0
    0.8884   -4.7199   -0.0455 H   0  0  0  0  0  0  0  0  0  0  0  0
    0.3848   -3.1019    0.4161 H   0  0  0  0  0  0  0  0  0  0  0  0
    1.1827   -4.1426    1.6006 H   0  0  0  0  0  0  0  0  0  0  0  0
   -1.7858   12.6893   -2.4122 H   0  0  0  0  0  0  0  0  0  0  0  0
   -2.5326   12.2187   -0.8774 H   0  0  0  0  0  0  0  0  0  0  0  0
   -3.4015   10.8211   -2.7112 H   0  0  0  0  0  0  0  0  0  0  0  0
    1.6537   11.5587   -1.5803 H   0  0  0  0  0  0  0  0  0  0  0  0
    0.6364   12.1789   -2.8701 H   0  0  0  0  0  0  0  0  0  0  0  0
    0.0461   14.1578   -1.5098 H   0  0  0  0  0  0  0  0  0  0  0  0
    1.7969   13.9931   -1.5918 H   0  0  0  0  0  0  0  0  0  0  0  0
   -0.1055   12.6709    2.0673 H   0  0  0  0  0  0  0  0  0  0  0  0
   -1.1647   13.3309    0.8267 H   0  0  0  0  0  0  0  0  0  0  0  0
   -1.3192   10.8800    0.8124 H   0  0  0  0  0  0  0  0  0  0  0  0
    0.4272   10.7197    0.7202 H   0  0  0  0  0  0  0  0  0  0  0  0
  1  2  1  0  0  0  0
  1 40  1  0  0  0  0
  1 41  1  0  0  0  0
  2  3  1  0  0  0  0
  2 11  1  0  0  0  0
  2 42  1  6  0  0  0
  3  4  1  0  0  0  0
  3  9  1  0  0  0  0
  3 43  1  1  0  0  0
  4  5  1  0  0  0  0
  4 10  1  0  0  0  0
  4 44  1  6  0  0  0
  5  6  1  0  0  0  0
  5 45  1  0  0  0  0
  5 46  1  0  0  0  0
  6  1  1  0  0  0  0
  6  7  2  0  0  0  0
  6  8  2  0  0  0  0
  9 47  1  0  0  0  0
 10 12  1  0  0  0  0
 10 48  1  0  0  0  0
 11 19  1  0  0  0  0
 11 49  1  0  0  0  0
 11 50  1  0  0  0  0
 12 13  1  0  0  0  0
 12 51  1  0  0  0  0
 12 52  1  0  0  0  0
 13 14  2  0  0  0  0
 14 15  1  0  0  0  0
 14 53  1  0  0  0  0
 15 16  2  0  0  0  0
 15 25  1  0  0  0  0
 16 17  1  0  0  0  0
 16 54  1  0  0  0  0
 17 18  2  0  0  0  0
 17 55  1  0  0  0  0
 18 13  1  0  0  0  0
 18 56  1  0  0  0  0
 19 20  2  0  0  0  0
 20 21  1  0  0  0  0
 20 57  1  0  0  0  0
 21 22  2  0  0  0  0
 21 29  1  0  0  0  0
 22 23  1  0  0  0  0
 23 24  2  0  0  0  0
 23 32  1  0  0  0  0
 24 19  1  0  0  0  0
 24 58  1  0  0  0  0
 25 26  1  0  0  0  0
 25 27  1  0  0  0  0
 25 28  1  0  0  0  0
 26 59  1  0  0  0  0
 26 60  1  0  0  0  0
 26 61  1  0  0  0  0
 27 62  1  0  0  0  0
 27 63  1  0  0  0  0
 27 64  1  0  0  0  0
 28 65  1  0  0  0  0
 28 66  1  0  0  0  0
 28 67  1  0  0  0  0
 29 30  1  0  0  0  0
 29 33  1  0  0  0  0
 30 31  1  0  0  0  0
 30 68  1  0  0  0  0
 30 69  1  0  0  0  0
 31 22  1  0  0  0  0
 31 70  1  0  0  0  0
 33 34  1  0  0  0  0
 33 71  1  0  0  0  0
 33 72  1  0  0  0  0
 34 35  1  0  0  0  0
 34 73  1  0  0  0  0
 34 74  1  0  0  0  0
 35 36  1  0  0  0  0
 35 38  1  0  0  0  0
 35 39  1  0  0  0  0
 36 37  1  0  0  0  0
 36 75  1  0  0  0  0
 36 76  1  0  0  0  0
 37 29  1  0  0  0  0
 37 77  1  0  0  0  0
 37 78  1  0  0  0  0
M  END
$$$$
Dataset (37)
 OpenBabel02101614293D

 72 76  0  0  0  0  0  0  0  0999 V2000
    0.7928    6.4727    0.7184 C   0  0  0  0  0  0  0  0  0  0  0  0
    2.2323    6.3127    0.1316 C   0  0  2  0  0  0  0  0  0  0  0  0
    3.1524    5.4572    1.0804 C   0  0  1  0  0  0  0  0  0  0  0  0
    2.6637    3.9842    1.3215 C   0  0  2  0  0  0  0  0  0  0  0  0
    1.2796    3.9199    2.0293 C   0  0  0  0  0  0  0  0  0  0  0  0
    0.0348    4.8574    1.0820 S   0  0  0  0  0  0  0  0  0  0  0  0
   -1.3011    5.0597    1.9435 O   0  0  0  0  0  0  0  0  0  0  0  0
   -0.2956    4.1009   -0.2925 O   0  0  0  0  0  0  0  0  0  0  0  0
    4.4734    5.4073    0.5340 O   0  0  0  0  0  0  0  0  0  0  0  0
    3.6829    3.2583    2.1323 N   0  0  0  0  0  0  0  0  0  0  0  0
    2.8479    7.7210   -0.1927 C   0  0  0  0  0  0  0  0  0  0  0  0
    3.5665    1.7815    2.1986 C   0  0  0  0  0  0  0  0  0  0  0  0
    4.6919    1.2168    2.9830 C   0  0  0  0  0  0  0  0  0  0  0  0
    5.8320    0.6916    2.3351 C   0  0  0  0  0  0  0  0  0  0  0  0
    6.9077    0.0880    3.0432 C   0  0  0  0  0  0  0  0  0  0  0  0
    6.7942    0.0599    4.4608 C   0  0  0  0  0  0  0  0  0  0  0  0
    5.6838    0.6012    5.1280 C   0  0  0  0  0  0  0  0  0  0  0  0
    4.6392    1.1769    4.3923 C   0  0  0  0  0  0  0  0  0  0  0  0
    2.0015    8.4951   -1.1478 C   0  0  0  0  0  0  0  0  0  0  0  0
    1.0088    9.3830   -0.6613 C   0  0  0  0  0  0  0  0  0  0  0  0
    0.0752    9.9399   -1.5564 C   0  0  0  0  0  0  0  0  0  0  0  0
    0.1723    9.6895   -2.9209 C   0  0  0  0  0  0  0  0  0  0  0  0
    1.1868    8.8697   -3.4413 C   0  0  0  0  0  0  0  0  0  0  0  0
    2.0943    8.2665   -2.5451 C   0  0  0  0  0  0  0  0  0  0  0  0
    8.0945   -0.4838    2.2780 C   0  0  0  0  0  0  0  0  0  0  0  0
    9.1836   -1.1643    3.1820 C   0  0  0  0  0  0  0  0  0  0  0  0
    8.8078    0.6726    1.4965 C   0  0  0  0  0  0  0  0  0  0  0  0
    7.5883   -1.5822    1.2793 C   0  0  0  0  0  0  0  0  0  0  0  0
   -1.1157   10.7726   -1.2765 C   0  0  0  0  0  0  0  0  0  0  0  0
   -1.6702   11.0564   -2.7123 C   0  0  0  0  0  0  0  0  0  0  0  0
   -0.8105   10.3233   -3.5710 N   0  0  0  0  0  0  0  0  0  0  0  0
    1.2668    8.6513   -4.7237 F   0  0  0  0  0  0  0  0  0  0  0  0
   -2.1272   10.1615   -0.2616 C   0  0  0  0  0  0  0  0  0  0  0  0
   -0.9001   11.9881   -0.3375 C   0  0  0  0  0  0  0  0  0  0  0  0
   -1.8368   11.3349    0.6971 C   0  0  0  0  0  0  0  0  0  0  0  0
    0.8256    7.0597    1.6387 H   0  0  0  0  0  0  0  0  0  0  0  0
    0.1214    6.9605    0.0131 H   0  0  0  0  0  0  0  0  0  0  0  0
    2.1485    5.7711   -0.8171 H   0  0  0  0  0  0  0  0  0  0  0  0
    3.2246    5.9680    2.0444 H   0  0  0  0  0  0  0  0  0  0  0  0
    2.5810    3.4970    0.3427 H   0  0  0  0  0  0  0  0  0  0  0  0
    0.9156    2.8949    2.1057 H   0  0  0  0  0  0  0  0  0  0  0  0
    1.3554    4.3463    3.0314 H   0  0  0  0  0  0  0  0  0  0  0  0
    5.0313    5.0259    1.2445 H   0  0  0  0  0  0  0  0  0  0  0  0
    3.6407    3.6244    3.0866 H   0  0  0  0  0  0  0  0  0  0  0  0
    2.9839    8.2802    0.7391 H   0  0  0  0  0  0  0  0  0  0  0  0
    3.8438    7.6027   -0.6292 H   0  0  0  0  0  0  0  0  0  0  0  0
    2.6287    1.4845    2.6690 H   0  0  0  0  0  0  0  0  0  0  0  0
    3.5620    1.3690    1.1865 H   0  0  0  0  0  0  0  0  0  0  0  0
    5.8688    0.7526    1.3165 H   0  0  0  0  0  0  0  0  0  0  0  0
    7.5159   -0.3526    5.0489 H   0  0  0  0  0  0  0  0  0  0  0  0
    5.6364    0.5731    6.1500 H   0  0  0  0  0  0  0  0  0  0  0  0
    3.8359    1.5593    4.8940 H   0  0  0  0  0  0  0  0  0  0  0  0
    0.9266    9.5765    0.3399 H   0  0  0  0  0  0  0  0  0  0  0  0
    2.8127    7.6391   -2.9139 H   0  0  0  0  0  0  0  0  0  0  0  0
   10.0100   -1.5618    2.5863 H   0  0  0  0  0  0  0  0  0  0  0  0
    9.6069   -0.4466    3.8887 H   0  0  0  0  0  0  0  0  0  0  0  0
    8.7539   -1.9963    3.7455 H   0  0  0  0  0  0  0  0  0  0  0  0
    9.6928    0.3095    0.9682 H   0  0  0  0  0  0  0  0  0  0  0  0
    9.1249    1.4599    2.1855 H   0  0  0  0  0  0  0  0  0  0  0  0
    8.1500    1.1228    0.7516 H   0  0  0  0  0  0  0  0  0  0  0  0
    8.4185   -2.0546    0.7491 H   0  0  0  0  0  0  0  0  0  0  0  0
    6.9229   -1.1661    0.5219 H   0  0  0  0  0  0  0  0  0  0  0  0
    7.0406   -2.3614    1.8157 H   0  0  0  0  0  0  0  0  0  0  0  0
   -1.6231   12.1136   -2.9778 H   0  0  0  0  0  0  0  0  0  0  0  0
   -2.6931   10.6984   -2.8480 H   0  0  0  0  0  0  0  0  0  0  0  0
   -0.9252   10.2865   -4.5327 H   0  0  0  0  0  0  0  0  0  0  0  0
   -1.7595    9.1823    0.1798 H   0  0  0  0  0  0  0  0  0  0  0  0
   -3.1985   10.2337   -0.6264 H   0  0  0  0  0  0  0  0  0  0  0  0
    0.1251   12.1060    0.0281 H   0  0  0  0  0  0  0  0  0  0  0  0
   -1.3010   12.9282   -0.7272 H   0  0  0  0  0  0  0  0  0  0  0  0
   -1.3149   11.0240    1.6061 H   0  0  0  0  0  0  0  0  0  0  0  0
   -2.7197   11.9416    0.9174 H   0  0  0  0  0  0  0  0  0  0  0  0
  1  2  1  0  0  0  0
  1 36  1  0  0  0  0
  1 37  1  0  0  0  0
  2  3  1  0  0  0  0
  2 11  1  0  0  0  0
  2 38  1  6  0  0  0
  3  4  1  0  0  0  0
  3  9  1  0  0  0  0
  3 39  1  1  0  0  0
  4  5  1  0  0  0  0
  4 10  1  0  0  0  0
  4 40  1  6  0  0  0
  5  6  1  0  0  0  0
  5 41  1  0  0  0  0
  5 42  1  0  0  0  0
  6  1  1  0  0  0  0
  6  7  2  0  0  0  0
  6  8  2  0  0  0  0
  9 43  1  0  0  0  0
 10 12  1  0  0  0  0
 10 44  1  0  0  0  0
 11 19  1  0  0  0  0
 11 45  1  0  0  0  0
 11 46  1  0  0  0  0
 12 13  1  0  0  0  0
 12 47  1  0  0  0  0
 12 48  1  0  0  0  0
 13 14  2  0  0  0  0
 14 15  1  0  0  0  0
 14 49  1  0  0  0  0
 15 16  2  0  0  0  0
 15 25  1  0  0  0  0
 16 17  1  0  0  0  0
 16 50  1  0  0  0  0
 17 18  2  0  0  0  0
 17 51  1  0  0  0  0
 18 13  1  0  0  0  0
 18 52  1  0  0  0  0
 19 20  2  0  0  0  0
 20 21  1  0  0  0  0
 20 53  1  0  0  0  0
 21 22  2  0  0  0  0
 21 29  1  0  0  0  0
 22 23  1  0  0  0  0
 23 24  2  0  0  0  0
 23 32  1  0  0  0  0
 24 19  1  0  0  0  0
 24 54  1  0  0  0  0
 25 26  1  0  0  0  0
 25 27  1  0  0  0  0
 25 28  1  0  0  0  0
 26 55  1  0  0  0  0
 26 56  1  0  0  0  0
 26 57  1  0  0  0  0
 27 58  1  0  0  0  0
 27 59  1  0  0  0  0
 27 60  1  0  0  0  0
 28 61  1  0  0  0  0
 28 62  1  0  0  0  0
 28 63  1  0  0  0  0
 29 30  1  0  0  0  0
 29 33  1  0  0  0  0
 29 34  1  0  0  0  0
 30 31  1  0  0  0  0
 30 64  1  0  0  0  0
 30 65  1  0  0  0  0
 31 22  1  0  0  0  0
 31 66  1  0  0  0  0
 33 35  1  0  0  0  0
 33 67  1  0  0  0  0
 33 68  1  0  0  0  0
 34 35  1  0  0  0  0
 34 69  1  0  0  0  0
 34 70  1  0  0  0  0
 35 71  1  0  0  0  0
 35 72  1  0  0  0  0
M  END
$$$$
Dataset (38)
 OpenBabel02101614293D

 74 76  0  0  0  0  0  0  0  0999 V2000
    0.5457    6.8586    1.3418 C   0  0  0  0  0  0  0  0  0  0  0  0
    1.9253    6.4948    0.7134 C   0  0  2  0  0  0  0  0  0  0  0  0
    2.8157    5.6586    1.7089 C   0  0  1  0  0  0  0  0  0  0  0  0
    2.2115    4.2770    2.1385 C   0  0  2  0  0  0  0  0  0  0  0  0
    0.8657    4.4141    2.9010 C   0  0  0  0  0  0  0  0  0  0  0  0
   -0.3311    5.3480    1.8816 S   0  0  0  0  0  0  0  0  0  0  0  0
   -1.6246    5.7249    2.7486 O   0  0  0  0  0  0  0  0  0  0  0  0
   -0.7545    4.4825    0.6006 O   0  0  0  0  0  0  0  0  0  0  0  0
    4.0875    5.4034    1.1047 O   0  0  0  0  0  0  0  0  0  0  0  0
    3.2100    3.5638    2.9864 N   0  0  0  0  0  0  0  0  0  0  0  0
    2.6477    7.7969    0.2227 C   0  0  0  0  0  0  0  0  0  0  0  0
    3.1136    2.0861    3.0280 C   0  0  0  0  0  0  0  0  0  0  0  0
    4.2382    1.5026    3.8061 C   0  0  0  0  0  0  0  0  0  0  0  0
    5.2378    0.7194    3.1801 C   0  0  0  0  0  0  0  0  0  0  0  0
    6.3026    0.1026    3.8950 C   0  0  0  0  0  0  0  0  0  0  0  0
    6.3185    0.3140    5.3000 C   0  0  0  0  0  0  0  0  0  0  0  0
    5.3510    1.1083    5.9405 C   0  0  0  0  0  0  0  0  0  0  0  0
    4.3197    1.7052    5.1994 C   0  0  0  0  0  0  0  0  0  0  0  0
    1.9866    8.5031   -0.9211 C   0  0  0  0  0  0  0  0  0  0  0  0
    2.0158    7.9099   -2.2042 C   0  0  0  0  0  0  0  0  0  0  0  0
    1.5325    8.5893   -3.3350 C   0  0  0  0  0  0  0  0  0  0  0  0
    0.9966    9.8899   -3.2258 C   0  0  0  0  0  0  0  0  0  0  0  0
    0.8919   10.4657   -1.9414 C   0  0  0  0  0  0  0  0  0  0  0  0
    1.3799    9.7766   -0.7654 C   0  0  0  0  0  0  0  0  0  0  0  0
    7.3509   -0.7161    3.1489 C   0  0  0  0  0  0  0  0  0  0  0  0
    8.4459   -1.3686    4.0648 C   0  0  0  0  0  0  0  0  0  0  0  0
    8.1078    0.2183    2.1445 C   0  0  0  0  0  0  0  0  0  0  0  0
    6.6637   -1.8940    2.3758 C   0  0  0  0  0  0  0  0  0  0  0  0
    0.6723   10.6493   -4.3176 N   0  0  0  0  0  0  0  0  0  0  0  0
    0.3576   11.6480   -1.7804 F   0  0  0  0  0  0  0  0  0  0  0  0
    0.1307   10.2608   -5.5102 C   0  0  0  0  0  0  0  0  0  0  0  0
   -0.3369    9.1124   -5.6904 O   0  0  0  0  0  0  0  0  0  0  0  0
    0.1019   11.2178   -6.6412 C   0  0  0  0  0  0  0  0  0  0  0  0
   -1.2651   11.6236   -7.0992 N   0  0  0  0  0  0  0  0  0  0  0  0
   -1.2203   12.4211   -8.3629 C   0  0  0  0  0  0  0  0  0  0  0  0
   -2.0661   12.3068   -6.0426 C   0  0  0  0  0  0  0  0  0  0  0  0
    0.6858    7.4945    2.2183 H   0  0  0  0  0  0  0  0  0  0  0  0
   -0.0879    7.3863    0.6275 H   0  0  0  0  0  0  0  0  0  0  0  0
    1.7440    5.8629   -0.1621 H   0  0  0  0  0  0  0  0  0  0  0  0
    3.0017    6.2591    2.6049 H   0  0  0  0  0  0  0  0  0  0  0  0
    2.0318    3.6974    1.2257 H   0  0  0  0  0  0  0  0  0  0  0  0
    0.4424    3.4357    3.1297 H   0  0  0  0  0  0  0  0  0  0  0  0
    1.0184    4.9516    3.8386 H   0  0  0  0  0  0  0  0  0  0  0  0
    4.6411    5.0227    1.8193 H   0  0  0  0  0  0  0  0  0  0  0  0
    3.1295    3.9178    3.9423 H   0  0  0  0  0  0  0  0  0  0  0  0
    2.7735    8.4717    1.0758 H   0  0  0  0  0  0  0  0  0  0  0  0
    3.6595    7.5468   -0.1099 H   0  0  0  0  0  0  0  0  0  0  0  0
    2.1704    1.7754    3.4839 H   0  0  0  0  0  0  0  0  0  0  0  0
    3.1265    1.7099    2.0023 H   0  0  0  0  0  0  0  0  0  0  0  0
    5.1837    0.5992    2.1681 H   0  0  0  0  0  0  0  0  0  0  0  0
    7.0383   -0.1013    5.8910 H   0  0  0  0  0  0  0  0  0  0  0  0
    5.3965    1.2515    6.9517 H   0  0  0  0  0  0  0  0  0  0  0  0
    3.6246    2.2809    5.6843 H   0  0  0  0  0  0  0  0  0  0  0  0
    2.4262    6.9810   -2.3339 H   0  0  0  0  0  0  0  0  0  0  0  0
    1.6173    8.1396   -4.2479 H   0  0  0  0  0  0  0  0  0  0  0  0
    1.3416   10.1461    0.2424 H   0  0  0  0  0  0  0  0  0  0  0  0
    9.1684   -1.9447    3.4801 H   0  0  0  0  0  0  0  0  0  0  0  0
    9.0031   -0.6052    4.6102 H   0  0  0  0  0  0  0  0  0  0  0  0
    7.9921   -2.0491    4.7873 H   0  0  0  0  0  0  0  0  0  0  0  0
    8.8866   -0.3262    1.6058 H   0  0  0  0  0  0  0  0  0  0  0  0
    8.5796    1.0473    2.6780 H   0  0  0  0  0  0  0  0  0  0  0  0
    7.4355    0.6410    1.3974 H   0  0  0  0  0  0  0  0  0  0  0  0
    7.4013   -2.5193    1.8666 H   0  0  0  0  0  0  0  0  0  0  0  0
    5.9739   -1.5316    1.6138 H   0  0  0  0  0  0  0  0  0  0  0  0
    6.1018   -2.5261    3.0677 H   0  0  0  0  0  0  0  0  0  0  0  0
    0.8630   11.5964   -4.2351 H   0  0  0  0  0  0  0  0  0  0  0  0
    0.6762   12.1128   -6.3847 H   0  0  0  0  0  0  0  0  0  0  0  0
    0.6243   10.7235   -7.4650 H   0  0  0  0  0  0  0  0  0  0  0  0
   -0.7399   11.8437   -9.1542 H   0  0  0  0  0  0  0  0  0  0  0  0
   -0.6666   13.3553   -8.2314 H   0  0  0  0  0  0  0  0  0  0  0  0
   -2.2292   12.6621   -8.7064 H   0  0  0  0  0  0  0  0  0  0  0  0
   -2.2629   11.6127   -5.2256 H   0  0  0  0  0  0  0  0  0  0  0  0
   -1.5378   13.1795   -5.6489 H   0  0  0  0  0  0  0  0  0  0  0  0
   -3.0373   12.6280   -6.4267 H   0  0  0  0  0  0  0  0  0  0  0  0
  1  2  1  0  0  0  0
  1 37  1  0  0  0  0
  1 38  1  0  0  0  0
  2  3  1  0  0  0  0
  2 11  1  0  0  0  0
  2 39  1  6  0  0  0
  3  4  1  0  0  0  0
  3  9  1  0  0  0  0
  3 40  1  1  0  0  0
  4  5  1  0  0  0  0
  4 10  1  0  0  0  0
  4 41  1  6  0  0  0
  5  6  1  0  0  0  0
  5 42  1  0  0  0  0
  5 43  1  0  0  0  0
  6  1  1  0  0  0  0
  6  7  2  0  0  0  0
  6  8  2  0  0  0  0
  9 44  1  0  0  0  0
 10 12  1  0  0  0  0
 10 45  1  0  0  0  0
 11 19  1  0  0  0  0
 11 46  1  0  0  0  0
 11 47  1  0  0  0  0
 12 13  1  0  0  0  0
 12 48  1  0  0  0  0
 12 49  1  0  0  0  0
 13 14  2  0  0  0  0
 14 15  1  0  0  0  0
 14 50  1  0  0  0  0
 15 16  2  0  0  0  0
 15 25  1  0  0  0  0
 16 17  1  0  0  0  0
 16 51  1  0  0  0  0
 17 18  2  0  0  0  0
 17 52  1  0  0  0  0
 18 13  1  0  0  0  0
 18 53  1  0  0  0  0
 19 20  2  0  0  0  0
 20 21  1  0  0  0  0
 20 54  1  0  0  0  0
 21 22  2  0  0  0  0
 21 55  1  0  0  0  0
 22 23  1  0  0  0  0
 23 24  2  0  0  0  0
 23 30  1  0  0  0  0
 24 19  1  0  0  0  0
 24 56  1  0  0  0  0
 25 26  1  0  0  0  0
 25 27  1  0  0  0  0
 25 28  1  0  0  0  0
 26 57  1  0  0  0  0
 26 58  1  0  0  0  0
 26 59  1  0  0  0  0
 27 60  1  0  0  0  0
 27 61  1  0  0  0  0
 27 62  1  0  0  0  0
 28 63  1  0  0  0  0
 28 64  1  0  0  0  0
 28 65  1  0  0  0  0
 29 22  1  0  0  0  0
 29 31  1  0  0  0  0
 29 66  1  0  0  0  0
 31 32  2  0  0  0  0
 31 33  1  0  0  0  0
 33 34  1  0  0  0  0
 33 67  1  0  0  0  0
 33 68  1  0  0  0  0
 34 35  1  0  0  0  0
 34 36  1  0  0  0  0
 35 69  1  0  0  0  0
 35 70  1  0  0  0  0
 35 71  1  0  0  0  0
 36 72  1  0  0  0  0
 36 73  1  0  0  0  0
 36 74  1  0  0  0  0
M  END
$$$$
Dataset (39)
 OpenBabel02101614293D

 67 69  0  0  0  0  0  0  0  0999 V2000
    0.7482    6.9917    1.0810 C   0  0  0  0  0  0  0  0  0  0  0  0
    2.0647    6.5463    0.3671 C   0  0  2  0  0  0  0  0  0  0  0  0
    2.9602    5.6550    1.3075 C   0  0  1  0  0  0  0  0  0  0  0  0
    2.2987    4.3124    1.7881 C   0  0  2  0  0  0  0  0  0  0  0  0
    1.0233    4.5514    2.6463 C   0  0  0  0  0  0  0  0  0  0  0  0
   -0.1814    5.5654    1.7270 S   0  0  0  0  0  0  0  0  0  0  0  0
   -1.3565    6.0652    2.6952 O   0  0  0  0  0  0  0  0  0  0  0  0
   -0.7841    4.7242    0.5019 O   0  0  0  0  0  0  0  0  0  0  0  0
    4.1770    5.3372    0.6261 O   0  0  0  0  0  0  0  0  0  0  0  0
    3.2952    3.5218    2.5689 N   0  0  0  0  0  0  0  0  0  0  0  0
    2.8336    7.8017   -0.1848 C   0  0  0  0  0  0  0  0  0  0  0  0
    2.9605    2.1052    2.8601 C   0  0  0  0  0  0  0  0  0  0  0  0
    4.0731    1.4500    3.5949 C   0  0  0  0  0  0  0  0  0  0  0  0
    5.0286    0.6674    2.9110 C   0  0  0  0  0  0  0  0  0  0  0  0
    6.0758   -0.0289    3.5775 C   0  0  0  0  0  0  0  0  0  0  0  0
    6.1329    0.1207    4.9903 C   0  0  0  0  0  0  0  0  0  0  0  0
    5.2106    0.9171    5.6901 C   0  0  0  0  0  0  0  0  0  0  0  0
    4.1864    1.5787    4.9970 C   0  0  0  0  0  0  0  0  0  0  0  0
    1.9970    8.6055   -1.1334 C   0  0  0  0  0  0  0  0  0  0  0  0
    1.2174    9.6895   -0.6410 C   0  0  0  0  0  0  0  0  0  0  0  0
    0.2100   10.2981   -1.4865 C   0  0  0  0  0  0  0  0  0  0  0  0
    0.1474    9.8209   -2.8894 C   0  0  0  0  0  0  0  0  0  0  0  0
    1.0254    8.7882   -3.4041 C   0  0  0  0  0  0  0  0  0  0  0  0
    1.9174    8.1995   -2.4906 C   0  0  0  0  0  0  0  0  0  0  0  0
    7.0551   -0.8758    2.7773 C   0  0  0  0  0  0  0  0  0  0  0  0
    8.1298   -1.6197    3.6484 C   0  0  0  0  0  0  0  0  0  0  0  0
    7.8329    0.0481    1.7774 C   0  0  0  0  0  0  0  0  0  0  0  0
    6.2623   -1.9793    1.9928 C   0  0  0  0  0  0  0  0  0  0  0  0
   -0.7513   10.2969   -3.8529 N   0  0  0  0  0  0  0  0  0  0  0  0
    0.9963    8.3754   -4.6453 F   0  0  0  0  0  0  0  0  0  0  0  0
   -0.7355   11.3010   -0.9372 C   0  0  0  0  0  0  0  0  0  0  0  0
   -2.0818   10.6563   -0.5270 C   0  0  0  0  0  0  0  0  0  0  0  0
    0.9759    7.6623    1.9119 H   0  0  0  0  0  0  0  0  0  0  0  0
    0.0692    7.4989    0.3963 H   0  0  0  0  0  0  0  0  0  0  0  0
    1.7843    5.9324   -0.4957 H   0  0  0  0  0  0  0  0  0  0  0  0
    3.2299    6.2477    2.1865 H   0  0  0  0  0  0  0  0  0  0  0  0
    2.0228    3.7390    0.8961 H   0  0  0  0  0  0  0  0  0  0  0  0
    0.5262    3.6143    2.8964 H   0  0  0  0  0  0  0  0  0  0  0  0
    1.2898    5.0676    3.5710 H   0  0  0  0  0  0  0  0  0  0  0  0
    4.7589    4.9430    1.3095 H   0  0  0  0  0  0  0  0  0  0  0  0
    3.4425    3.9989    3.4607 H   0  0  0  0  0  0  0  0  0  0  0  0
    3.7460    7.4853   -0.6988 H   0  0  0  0  0  0  0  0  0  0  0  0
    3.1633    8.4176    0.6579 H   0  0  0  0  0  0  0  0  0  0  0  0
    2.0532    2.0310    3.4625 H   0  0  0  0  0  0  0  0  0  0  0  0
    2.7643    1.5782    1.9224 H   0  0  0  0  0  0  0  0  0  0  0  0
    4.9489    0.6041    1.8940 H   0  0  0  0  0  0  0  0  0  0  0  0
    6.8493   -0.3443    5.5458 H   0  0  0  0  0  0  0  0  0  0  0  0
    5.2842    1.0118    6.7070 H   0  0  0  0  0  0  0  0  0  0  0  0
    3.5181    2.1463    5.5233 H   0  0  0  0  0  0  0  0  0  0  0  0
    1.4079    9.9474    0.3865 H   0  0  0  0  0  0  0  0  0  0  0  0
    2.5126    7.4352   -2.8220 H   0  0  0  0  0  0  0  0  0  0  0  0
    8.8052   -2.2153    3.0285 H   0  0  0  0  0  0  0  0  0  0  0  0
    8.7410   -0.9066    4.2069 H   0  0  0  0  0  0  0  0  0  0  0  0
    7.6510   -2.2970    4.3600 H   0  0  0  0  0  0  0  0  0  0  0  0
    8.5791   -0.5147    1.2122 H   0  0  0  0  0  0  0  0  0  0  0  0
    8.3490    0.8465    2.3170 H   0  0  0  0  0  0  0  0  0  0  0  0
    7.1636    0.5131    1.0519 H   0  0  0  0  0  0  0  0  0  0  0  0
    6.9349   -2.6419    1.4443 H   0  0  0  0  0  0  0  0  0  0  0  0
    5.5776   -1.5460    1.2624 H   0  0  0  0  0  0  0  0  0  0  0  0
    5.6731   -2.5889    2.6827 H   0  0  0  0  0  0  0  0  0  0  0  0
   -0.7312    9.9483   -4.7592 H   0  0  0  0  0  0  0  0  0  0  0  0
   -1.3908   10.9891   -3.6172 H   0  0  0  0  0  0  0  0  0  0  0  0
   -0.9193   12.0793   -1.6817 H   0  0  0  0  0  0  0  0  0  0  0  0
   -0.3007   11.7874   -0.0583 H   0  0  0  0  0  0  0  0  0  0  0  0
   -2.7499   11.4219   -0.1237 H   0  0  0  0  0  0  0  0  0  0  0  0
   -1.9199    9.8960    0.2430 H   0  0  0  0  0  0  0  0  0  0  0  0
   -2.5676   10.1929   -1.3905 H   0  0  0  0  0  0  0  0  0  0  0  0
  1  2  1  0  0  0  0
  1 33  1  0  0  0  0
  1 34  1  0  0  0  0
  2  3  1  0  0  0  0
  2 11  1  0  0  0  0
  2 35  1  6  0  0  0
  3  4  1  0  0  0  0
  3  9  1  0  0  0  0
  3 36  1  1  0  0  0
  4  5  1  0  0  0  0
  4 10  1  0  0  0  0
  4 37  1  6  0  0  0
  5  6  1  0  0  0  0
  5 38  1  0  0  0  0
  5 39  1  0  0  0  0
  6  1  1  0  0  0  0
  6  7  2  0  0  0  0
  6  8  2  0  0  0  0
  9 40  1  0  0  0  0
 10 12  1  0  0  0  0
 10 41  1  0  0  0  0
 11 19  1  0  0  0  0
 11 42  1  0  0  0  0
 11 43  1  0  0  0  0
 12 13  1  0  0  0  0
 12 44  1  0  0  0  0
 12 45  1  0  0  0  0
 13 14  2  0  0  0  0
 14 15  1  0  0  0  0
 14 46  1  0  0  0  0
 15 16  2  0  0  0  0
 15 25  1  0  0  0  0
 16 17  1  0  0  0  0
 16 47  1  0  0  0  0
 17 18  2  0  0  0  0
 17 48  1  0  0  0  0
 18 13  1  0  0  0  0
 18 49  1  0  0  0  0
 19 20  2  0  0  0  0
 20 21  1  0  0  0  0
 20 50  1  0  0  0  0
 21 22  2  0  0  0  0
 21 31  1  0  0  0  0
 22 23  1  0  0  0  0
 23 24  2  0  0  0  0
 23 30  1  0  0  0  0
 24 19  1  0  0  0  0
 24 51  1  0  0  0  0
 25 26  1  0  0  0  0
 25 27  1  0  0  0  0
 25 28  1  0  0  0  0
 26 52  1  0  0  0  0
 26 53  1  0  0  0  0
 26 54  1  0  0  0  0
 27 55  1  0  0  0  0
 27 56  1  0  0  0  0
 27 57  1  0  0  0  0
 28 58  1  0  0  0  0
 28 59  1  0  0  0  0
 28 60  1  0  0  0  0
 29 22  1  0  0  0  0
 29 61  1  0  0  0  0
 29 62  1  0  0  0  0
 31 32  1  0  0  0  0
 31 63  1  0  0  0  0
 31 64  1  0  0  0  0
 32 65  1  0  0  0  0
 32 66  1  0  0  0  0
 32 67  1  0  0  0  0
M  END
$$$$
Dataset (40)
 OpenBabel02101614293D

 72 74  0  0  0  0  0  0  0  0999 V2000
    0.4537    6.6953    0.9463 C   0  0  0  0  0  0  0  0  0  0  0  0
    1.8272    6.3721    0.2815 C   0  0  2  0  0  0  0  0  0  0  0  0
    2.7459    5.5083    1.2282 C   0  0  1  0  0  0  0  0  0  0  0  0
    2.1685    4.1039    1.6175 C   0  0  2  0  0  0  0  0  0  0  0  0
    0.8327    4.1909    2.4068 C   0  0  0  0  0  0  0  0  0  0  0  0
   -0.3912    5.1527    1.4496 S   0  0  0  0  0  0  0  0  0  0  0  0
   -1.6772    5.4783    2.3486 O   0  0  0  0  0  0  0  0  0  0  0  0
   -0.8239    4.3162    0.1515 O   0  0  0  0  0  0  0  0  0  0  0  0
    4.0000    5.2771    0.5788 O   0  0  0  0  0  0  0  0  0  0  0  0
    3.1791    3.3502    2.4157 N   0  0  0  0  0  0  0  0  0  0  0  0
    2.5391    7.6985   -0.1607 C   0  0  0  0  0  0  0  0  0  0  0  0
    3.0680    1.8717    2.3929 C   0  0  0  0  0  0  0  0  0  0  0  0
    4.1761    1.2431    3.1539 C   0  0  0  0  0  0  0  0  0  0  0  0
    5.1855    0.5054    2.4962 C   0  0  0  0  0  0  0  0  0  0  0  0
    6.2265   -0.1626    3.1955 C   0  0  0  0  0  0  0  0  0  0  0  0
    6.2086   -0.0538    4.6143 C   0  0  0  0  0  0  0  0  0  0  0  0
    5.2331    0.7015    5.2863 C   0  0  0  0  0  0  0  0  0  0  0  0
    4.2256    1.3515    4.5590 C   0  0  0  0  0  0  0  0  0  0  0  0
    1.8865    8.4820   -1.2603 C   0  0  0  0  0  0  0  0  0  0  0  0
    1.9076    7.9801   -2.5896 C   0  0  0  0  0  0  0  0  0  0  0  0
    1.4215    8.7863   -3.6941 C   0  0  0  0  0  0  0  0  0  0  0  0
    0.8834   10.1239   -3.3419 C   0  0  0  0  0  0  0  0  0  0  0  0
    0.8293   10.6047   -1.9727 C   0  0  0  0  0  0  0  0  0  0  0  0
    1.3279    9.7525   -0.9732 C   0  0  0  0  0  0  0  0  0  0  0  0
    7.2817   -0.9388    2.4179 C   0  0  0  0  0  0  0  0  0  0  0  0
    6.6050   -2.0455    1.5366 C   0  0  0  0  0  0  0  0  0  0  0  0
    8.0754    0.0396    1.4866 C   0  0  0  0  0  0  0  0  0  0  0  0
    8.3414   -1.6664    3.3182 C   0  0  0  0  0  0  0  0  0  0  0  0
    0.3922   11.1058   -4.2250 N   0  0  0  0  0  0  0  0  0  0  0  0
    0.3445   11.7775   -1.6485 F   0  0  0  0  0  0  0  0  0  0  0  0
    1.5379    8.2581   -5.0769 C   0  0  0  0  0  0  0  0  0  0  0  0
    0.6085    7.0471   -5.3200 C   0  0  0  0  0  0  0  0  0  0  0  0
   -0.5562   10.9488   -5.1852 C   0  0  0  0  0  0  0  0  0  0  0  0
   -0.9228   12.1117   -6.0122 C   0  0  0  0  0  0  0  0  0  0  0  0
   -1.1532    9.8611   -5.3574 O   0  0  0  0  0  0  0  0  0  0  0  0
    0.6043    7.3105    1.8381 H   0  0  0  0  0  0  0  0  0  0  0  0
   -0.2023    7.2320    0.2574 H   0  0  0  0  0  0  0  0  0  0  0  0
    1.6330    5.7789   -0.6169 H   0  0  0  0  0  0  0  0  0  0  0  0
    2.9479    6.0759    2.1420 H   0  0  0  0  0  0  0  0  0  0  0  0
    1.9829    3.5705    0.6789 H   0  0  0  0  0  0  0  0  0  0  0  0
    0.4143    3.1980    2.5803 H   0  0  0  0  0  0  0  0  0  0  0  0
    0.9920    4.6795    3.3714 H   0  0  0  0  0  0  0  0  0  0  0  0
    4.5551    4.8123    1.2402 H   0  0  0  0  0  0  0  0  0  0  0  0
    3.1132    3.6616    3.3880 H   0  0  0  0  0  0  0  0  0  0  0  0
    2.6807    8.3190    0.7300 H   0  0  0  0  0  0  0  0  0  0  0  0
    3.5467    7.4686   -0.5153 H   0  0  0  0  0  0  0  0  0  0  0  0
    2.1262    1.5507    2.8366 H   0  0  0  0  0  0  0  0  0  0  0  0
    3.0698    1.5290    1.3554 H   0  0  0  0  0  0  0  0  0  0  0  0
    5.1544    0.4558    1.4760 H   0  0  0  0  0  0  0  0  0  0  0  0
    6.9038   -0.5225    5.1952 H   0  0  0  0  0  0  0  0  0  0  0  0
    5.2540    0.7712    6.3077 H   0  0  0  0  0  0  0  0  0  0  0  0
    3.5216    1.8948    5.0612 H   0  0  0  0  0  0  0  0  0  0  0  0
    2.3345    6.9965   -2.6762 H   0  0  0  0  0  0  0  0  0  0  0  0
    1.2923   10.0797   -0.0051 H   0  0  0  0  0  0  0  0  0  0  0  0
    7.3530   -2.6305    0.9962 H   0  0  0  0  0  0  0  0  0  0  0  0
    5.9365   -1.6207    0.7867 H   0  0  0  0  0  0  0  0  0  0  0  0
    6.0228   -2.7309    2.1553 H   0  0  0  0  0  0  0  0  0  0  0  0
    8.8521   -0.4901    0.9304 H   0  0  0  0  0  0  0  0  0  0  0  0
    8.5578    0.8247    2.0718 H   0  0  0  0  0  0  0  0  0  0  0  0
    7.4259    0.5180    0.7524 H   0  0  0  0  0  0  0  0  0  0  0  0
    9.0680   -2.2161    2.7164 H   0  0  0  0  0  0  0  0  0  0  0  0
    8.8999   -0.9510    3.9247 H   0  0  0  0  0  0  0  0  0  0  0  0
    7.8611   -2.3850    3.9849 H   0  0  0  0  0  0  0  0  0  0  0  0
    0.7302   12.0073   -4.0981 H   0  0  0  0  0  0  0  0  0  0  0  0
    1.3059    9.0320   -5.8083 H   0  0  0  0  0  0  0  0  0  0  0  0
    2.5748    7.9589   -5.2572 H   0  0  0  0  0  0  0  0  0  0  0  0
    0.6819    6.7310   -6.3603 H   0  0  0  0  0  0  0  0  0  0  0  0
   -0.4305    7.3074   -5.1107 H   0  0  0  0  0  0  0  0  0  0  0  0
    0.8989    6.2102   -4.6835 H   0  0  0  0  0  0  0  0  0  0  0  0
   -1.7608   11.8795   -6.6743 H   0  0  0  0  0  0  0  0  0  0  0  0
   -1.2122   12.9424   -5.3655 H   0  0  0  0  0  0  0  0  0  0  0  0
   -0.0704   12.4187   -6.6219 H   0  0  0  0  0  0  0  0  0  0  0  0
  1  2  1  0  0  0  0
  1 36  1  0  0  0  0
  1 37  1  0  0  0  0
  2  3  1  0  0  0  0
  2 11  1  0  0  0  0
  2 38  1  6  0  0  0
  3  4  1  0  0  0  0
  3  9  1  0  0  0  0
  3 39  1  1  0  0  0
  4  5  1  0  0  0  0
  4 10  1  0  0  0  0
  4 40  1  6  0  0  0
  5  6  1  0  0  0  0
  5 41  1  0  0  0  0
  5 42  1  0  0  0  0
  6  1  1  0  0  0  0
  6  7  2  0  0  0  0
  6  8  2  0  0  0  0
  9 43  1  0  0  0  0
 10 12  1  0  0  0  0
 10 44  1  0  0  0  0
 11 19  1  0  0  0  0
 11 45  1  0  0  0  0
 11 46  1  0  0  0  0
 12 13  1  0  0  0  0
 12 47  1  0  0  0  0
 12 48  1  0  0  0  0
 13 14  2  0  0  0  0
 14 15  1  0  0  0  0
 14 49  1  0  0  0  0
 15 16  2  0  0  0  0
 15 25  1  0  0  0  0
 16 17  1  0  0  0  0
 16 50  1  0  0  0  0
 17 18  2  0  0  0  0
 17 51  1  0  0  0  0
 18 13  1  0  0  0  0
 18 52  1  0  0  0  0
 19 20  2  0  0  0  0
 20 21  1  0  0  0  0
 20 53  1  0  0  0  0
 21 22  2  0  0  0  0
 21 31  1  0  0  0  0
 22 23  1  0  0  0  0
 23 24  2  0  0  0  0
 23 30  1  0  0  0  0
 24 19  1  0  0  0  0
 24 54  1  0  0  0  0
 25 26  1  0  0  0  0
 25 27  1  0  0  0  0
 25 28  1  0  0  0  0
 26 55  1  0  0  0  0
 26 56  1  0  0  0  0
 26 57  1  0  0  0  0
 27 58  1  0  0  0  0
 27 59  1  0  0  0  0
 27 60  1  0  0  0  0
 28 61  1  0  0  0  0
 28 62  1  0  0  0  0
 28 63  1  0  0  0  0
 29 22  1  0  0  0  0
 29 33  1  0  0  0  0
 29 64  1  0  0  0  0
 31 32  1  0  0  0  0
 31 65  1  0  0  0  0
 31 66  1  0  0  0  0
 32 67  1  0  0  0  0
 32 68  1  0  0  0  0
 32 69  1  0  0  0  0
 33 34  1  0  0  0  0
 33 35  2  0  0  0  0
 34 70  1  0  0  0  0
 34 71  1  0  0  0  0
 34 72  1  0  0  0  0
M  END
$$$$
Dataset (41)
 OpenBabel02101614293D

 80 82  0  0  0  0  0  0  0  0999 V2000
    0.2686    6.4265    0.6386 C   0  0  0  0  0  0  0  0  0  0  0  0
    1.6793    6.1898    0.0152 C   0  0  2  0  0  0  0  0  0  0  0  0
    2.5949    5.2627    0.8971 C   0  0  1  0  0  0  0  0  0  0  0  0
    2.0286    3.8267    1.1426 C   0  0  2  0  0  0  0  0  0  0  0  0
    0.6971    3.8383    1.9435 C   0  0  0  0  0  0  0  0  0  0  0  0
   -0.5502    4.8501    1.0703 S   0  0  0  0  0  0  0  0  0  0  0  0
   -1.8145    5.1300    2.0155 O   0  0  0  0  0  0  0  0  0  0  0  0
   -1.0156    4.0878   -0.2611 O   0  0  0  0  0  0  0  0  0  0  0  0
    3.8655    5.1194    0.2524 O   0  0  0  0  0  0  0  0  0  0  0  0
    3.0549    3.0291    1.8693 N   0  0  0  0  0  0  0  0  0  0  0  0
    2.3861    7.5644   -0.2428 C   0  0  0  0  0  0  0  0  0  0  0  0
    2.9854    1.5584    1.7120 C   0  0  0  0  0  0  0  0  0  0  0  0
    4.0968    0.8983    2.4445 C   0  0  0  0  0  0  0  0  0  0  0  0
    5.1331    0.2130    1.7667 C   0  0  0  0  0  0  0  0  0  0  0  0
    6.1791   -0.4750    2.4442 C   0  0  0  0  0  0  0  0  0  0  0  0
    6.1467   -0.4292    3.8630 C   0  0  0  0  0  0  0  0  0  0  0  0
    5.1380    0.2608    4.5556 C   0  0  0  0  0  0  0  0  0  0  0  0
    4.1201    0.9203    3.8535 C   0  0  0  0  0  0  0  0  0  0  0  0
    1.8269    8.4088   -1.3416 C   0  0  0  0  0  0  0  0  0  0  0  0
    1.8974    7.9482   -2.6850 C   0  0  0  0  0  0  0  0  0  0  0  0
    1.4815    8.8044   -3.7781 C   0  0  0  0  0  0  0  0  0  0  0  0
    1.0073   10.1605   -3.4036 C   0  0  0  0  0  0  0  0  0  0  0  0
    0.9086   10.6028   -2.0257 C   0  0  0  0  0  0  0  0  0  0  0  0
    1.3168    9.6962   -1.0350 C   0  0  0  0  0  0  0  0  0  0  0  0
    7.2575   -1.2047    1.6527 C   0  0  0  0  0  0  0  0  0  0  0  0
    8.3163   -1.9669    2.5290 C   0  0  0  0  0  0  0  0  0  0  0  0
    8.0468   -0.1630    0.7881 C   0  0  0  0  0  0  0  0  0  0  0  0
    6.5926   -2.2816    0.7267 C   0  0  0  0  0  0  0  0  0  0  0  0
    0.6891   11.1954   -4.2991 N   0  0  0  0  0  0  0  0  0  0  0  0
    0.4811   11.7900   -1.6762 F   0  0  0  0  0  0  0  0  0  0  0  0
   -0.3038   11.2045   -5.2261 C   0  0  0  0  0  0  0  0  0  0  0  0
   -1.1771   10.3059   -5.2627 O   0  0  0  0  0  0  0  0  0  0  0  0
   -0.3329   12.3094   -6.2159 C   0  0  0  0  0  0  0  0  0  0  0  0
   -1.4243   13.3205   -6.0330 N   0  0  0  0  0  0  0  0  0  0  0  0
   -1.4023   14.3600   -7.1099 C   0  0  0  0  0  0  0  0  0  0  0  0
   -1.4559   13.9399   -4.6735 C   0  0  0  0  0  0  0  0  0  0  0  0
    1.6403    8.3381   -5.1798 C   0  0  0  0  0  0  0  0  0  0  0  0
    0.6793    7.1885   -5.5650 C   0  0  0  0  0  0  0  0  0  0  0  0
    0.3589    7.0130    1.5555 H   0  0  0  0  0  0  0  0  0  0  0  0
   -0.3783    6.9650   -0.0571 H   0  0  0  0  0  0  0  0  0  0  0  0
    1.5361    5.6817   -0.9428 H   0  0  0  0  0  0  0  0  0  0  0  0
    2.7728    5.7534    1.8594 H   0  0  0  0  0  0  0  0  0  0  0  0
    1.8478    3.3771    0.1589 H   0  0  0  0  0  0  0  0  0  0  0  0
    0.2974    2.8285    2.0510 H   0  0  0  0  0  0  0  0  0  0  0  0
    0.8594    4.2600    2.9376 H   0  0  0  0  0  0  0  0  0  0  0  0
    4.4488    4.6969    0.9156 H   0  0  0  0  0  0  0  0  0  0  0  0
    2.9716    3.2492    2.8638 H   0  0  0  0  0  0  0  0  0  0  0  0
    3.4355    7.4079   -0.4989 H   0  0  0  0  0  0  0  0  0  0  0  0
    2.4005    8.1100    0.7046 H   0  0  0  0  0  0  0  0  0  0  0  0
    2.0379    1.1779    2.0976 H   0  0  0  0  0  0  0  0  0  0  0  0
    3.0279    1.3147    0.6488 H   0  0  0  0  0  0  0  0  0  0  0  0
    5.1174    0.2146    0.7469 H   0  0  0  0  0  0  0  0  0  0  0  0
    6.8559   -0.8959    4.4271 H   0  0  0  0  0  0  0  0  0  0  0  0
    5.1396    0.2803    5.5760 H   0  0  0  0  0  0  0  0  0  0  0  0
    3.3897    1.4073    4.3806 H   0  0  0  0  0  0  0  0  0  0  0  0
    2.3090    6.9602   -2.7915 H   0  0  0  0  0  0  0  0  0  0  0  0
    1.2592   10.0036   -0.0597 H   0  0  0  0  0  0  0  0  0  0  0  0
    9.0652   -2.4622    1.9057 H   0  0  0  0  0  0  0  0  0  0  0  0
    8.8469   -1.2815    3.1924 H   0  0  0  0  0  0  0  0  0  0  0  0
    7.8375   -2.7347    3.1404 H   0  0  0  0  0  0  0  0  0  0  0  0
    8.8493   -0.6436    0.2247 H   0  0  0  0  0  0  0  0  0  0  0  0
    8.4917    0.6052    1.4251 H   0  0  0  0  0  0  0  0  0  0  0  0
    7.3994    0.3354    0.0657 H   0  0  0  0  0  0  0  0  0  0  0  0
    7.3449   -2.8447    0.1702 H   0  0  0  0  0  0  0  0  0  0  0  0
    5.9256   -1.8301   -0.0077 H   0  0  0  0  0  0  0  0  0  0  0  0
    6.0083   -2.9883    1.3210 H   0  0  0  0  0  0  0  0  0  0  0  0
    1.2461   11.9873   -4.2527 H   0  0  0  0  0  0  0  0  0  0  0  0
    0.6315   12.8281   -6.2057 H   0  0  0  0  0  0  0  0  0  0  0  0
   -0.4325   11.8458   -7.2023 H   0  0  0  0  0  0  0  0  0  0  0  0
   -1.4496   13.8922   -8.0954 H   0  0  0  0  0  0  0  0  0  0  0  0
   -0.4937   14.9675   -7.0579 H   0  0  0  0  0  0  0  0  0  0  0  0
   -2.2660   15.0237   -7.0248 H   0  0  0  0  0  0  0  0  0  0  0  0
   -1.6835   13.1827   -3.9216 H   0  0  0  0  0  0  0  0  0  0  0  0
   -0.4970   14.4011   -4.4242 H   0  0  0  0  0  0  0  0  0  0  0  0
   -2.2359   14.7022   -4.6067 H   0  0  0  0  0  0  0  0  0  0  0  0
    2.6713    7.9960   -5.3182 H   0  0  0  0  0  0  0  0  0  0  0  0
    1.4828    9.1621   -5.8793 H   0  0  0  0  0  0  0  0  0  0  0  0
    0.8477    6.9153   -6.6094 H   0  0  0  0  0  0  0  0  0  0  0  0
   -0.3608    7.5020   -5.4504 H   0  0  0  0  0  0  0  0  0  0  0  0
    0.8563    6.3047   -4.9475 H   0  0  0  0  0  0  0  0  0  0  0  0
  1  2  1  0  0  0  0
  1 39  1  0  0  0  0
  1 40  1  0  0  0  0
  2  3  1  0  0  0  0
  2 11  1  0  0  0  0
  2 41  1  6  0  0  0
  3  4  1  0  0  0  0
  3  9  1  0  0  0  0
  3 42  1  1  0  0  0
  4  5  1  0  0  0  0
  4 10  1  0  0  0  0
  4 43  1  6  0  0  0
  5  6  1  0  0  0  0
  5 44  1  0  0  0  0
  5 45  1  0  0  0  0
  6  1  1  0  0  0  0
  6  7  2  0  0  0  0
  6  8  2  0  0  0  0
  9 46  1  0  0  0  0
 10 12  1  0  0  0  0
 10 47  1  0  0  0  0
 11 19  1  0  0  0  0
 11 48  1  0  0  0  0
 11 49  1  0  0  0  0
 12 13  1  0  0  0  0
 12 50  1  0  0  0  0
 12 51  1  0  0  0  0
 13 14  2  0  0  0  0
 14 15  1  0  0  0  0
 14 52  1  0  0  0  0
 15 16  2  0  0  0  0
 15 25  1  0  0  0  0
 16 17  1  0  0  0  0
 16 53  1  0  0  0  0
 17 18  2  0  0  0  0
 17 54  1  0  0  0  0
 18 13  1  0  0  0  0
 18 55  1  0  0  0  0
 19 20  2  0  0  0  0
 20 21  1  0  0  0  0
 20 56  1  0  0  0  0
 21 22  2  0  0  0  0
 21 37  1  0  0  0  0
 22 23  1  0  0  0  0
 23 24  2  0  0  0  0
 23 30  1  0  0  0  0
 24 19  1  0  0  0  0
 24 57  1  0  0  0  0
 25 26  1  0  0  0  0
 25 27  1  0  0  0  0
 25 28  1  0  0  0  0
 26 58  1  0  0  0  0
 26 59  1  0  0  0  0
 26 60  1  0  0  0  0
 27 61  1  0  0  0  0
 27 62  1  0  0  0  0
 27 63  1  0  0  0  0
 28 64  1  0  0  0  0
 28 65  1  0  0  0  0
 28 66  1  0  0  0  0
 29 22  1  0  0  0  0
 29 31  1  0  0  0  0
 29 67  1  0  0  0  0
 31 32  2  0  0  0  0
 31 33  1  0  0  0  0
 33 34  1  0  0  0  0
 33 68  1  0  0  0  0
 33 69  1  0  0  0  0
 34 35  1  0  0  0  0
 34 36  1  0  0  0  0
 35 70  1  0  0  0  0
 35 71  1  0  0  0  0
 35 72  1  0  0  0  0
 36 73  1  0  0  0  0
 36 74  1  0  0  0  0
 36 75  1  0  0  0  0
 37 38  1  0  0  0  0
 37 76  1  0  0  0  0
 37 77  1  0  0  0  0
 38 78  1  0  0  0  0
 38 79  1  0  0  0  0
 38 80  1  0  0  0  0
M  END
$$$$
Dataset (42)
 OpenBabel02101614293D

 77 80  0  0  0  0  0  0  0  0999 V2000
    0.5591    6.9806    1.8369 C   0  0  0  0  0  0  0  0  0  0  0  0
    1.3805    6.6102    0.5610 C   0  0  2  0  0  0  0  0  0  0  0  0
    2.7157    5.8506    0.9197 C   0  0  1  0  0  0  0  0  0  0  0  0
    2.5296    4.4879    1.6838 C   0  0  2  0  0  0  0  0  0  0  0  0
    1.8308    4.6657    3.0620 C   0  0  0  0  0  0  0  0  0  0  0  0
    0.2273    5.5134    2.8665 S   0  0  0  0  0  0  0  0  0  0  0  0
   -0.3550    5.9613    4.2911 O   0  0  0  0  0  0  0  0  0  0  0  0
   -0.8126    4.5536    2.1123 O   0  0  0  0  0  0  0  0  0  0  0  0
    3.4406    5.5830   -0.2852 O   0  0  0  0  0  0  0  0  0  0  0  0
    3.8614    3.8354    1.8700 N   0  0  0  0  0  0  0  0  0  0  0  0
    1.6279    7.8947   -0.3120 C   0  0  0  0  0  0  0  0  0  0  0  0
    3.8607    2.4095    2.2867 C   0  0  0  0  0  0  0  0  0  0  0  0
    5.2456    1.8787    2.3628 C   0  0  0  0  0  0  0  0  0  0  0  0
    5.7968    1.1238    1.3025 C   0  0  0  0  0  0  0  0  0  0  0  0
    7.1006    0.5560    1.3570 C   0  0  0  0  0  0  0  0  0  0  0  0
    7.8469    0.8040    2.5417 C   0  0  0  0  0  0  0  0  0  0  0  0
    7.3280    1.5650    3.6006 C   0  0  0  0  0  0  0  0  0  0  0  0
    6.0362    2.0992    3.5089 C   0  0  0  0  0  0  0  0  0  0  0  0
    0.3552    8.5475   -0.7470 C   0  0  0  0  0  0  0  0  0  0  0  0
   -0.3805    8.0470   -1.8429 C   0  0  0  0  0  0  0  0  0  0  0  0
   -1.7068    8.4532   -2.1650 C   0  0  0  0  0  0  0  0  0  0  0  0
   -2.2237    9.5411   -1.3504 C   0  0  0  0  0  0  0  0  0  0  0  0
   -1.4573   10.1143   -0.3089 C   0  0  0  0  0  0  0  0  0  0  0  0
   -0.1826    9.6196   -0.0144 C   0  0  0  0  0  0  0  0  0  0  0  0
    7.6241   -0.2660    0.1870 C   0  0  0  0  0  0  0  0  0  0  0  0
    6.6661   -1.4807   -0.0715 C   0  0  0  0  0  0  0  0  0  0  0  0
    7.7045    0.6484   -1.0824 C   0  0  0  0  0  0  0  0  0  0  0  0
    9.0579   -0.8649    0.4106 C   0  0  0  0  0  0  0  0  0  0  0  0
   -3.4468   10.0903   -1.5183 N   0  0  0  0  0  0  0  0  0  0  0  0
   -1.9102   11.1031    0.4214 F   0  0  0  0  0  0  0  0  0  0  0  0
   -2.3808    7.6644   -3.3265 C   0  0  0  0  0  0  0  0  0  0  0  0
   -2.6804    6.1047   -3.1094 C   0  0  0  0  0  0  0  0  0  0  0  0
   -3.0686    5.6376   -1.6933 C   0  0  0  0  0  0  0  0  0  0  0  0
   -1.7775    5.1198   -2.3367 C   0  0  0  0  0  0  0  0  0  0  0  0
   -1.4820    7.8176   -4.6997 C   0  0  0  0  0  0  0  0  0  0  0  0
   -3.8600    8.2341   -3.7795 C   0  0  0  0  0  0  0  0  0  0  0  0
    1.1078    7.7080    2.4370 H   0  0  0  0  0  0  0  0  0  0  0  0
   -0.4104    7.4047    1.5799 H   0  0  0  0  0  0  0  0  0  0  0  0
    0.7738    5.9213   -0.0340 H   0  0  0  0  0  0  0  0  0  0  0  0
    3.3408    6.5126    1.5260 H   0  0  0  0  0  0  0  0  0  0  0  0
    1.9037    3.8400    1.0590 H   0  0  0  0  0  0  0  0  0  0  0  0
    1.6320    3.7028    3.5340 H   0  0  0  0  0  0  0  0  0  0  0  0
    2.4633    5.2597    3.7236 H   0  0  0  0  0  0  0  0  0  0  0  0
    4.3184    5.2567    0.0087 H   0  0  0  0  0  0  0  0  0  0  0  0
    4.3758    4.3728    2.5729 H   0  0  0  0  0  0  0  0  0  0  0  0
    2.2403    8.5984    0.2606 H   0  0  0  0  0  0  0  0  0  0  0  0
    2.2058    7.6374   -1.2030 H   0  0  0  0  0  0  0  0  0  0  0  0
    3.3844    2.2901    3.2605 H   0  0  0  0  0  0  0  0  0  0  0  0
    3.2735    1.8231    1.5750 H   0  0  0  0  0  0  0  0  0  0  0  0
    5.2227    0.9839    0.4704 H   0  0  0  0  0  0  0  0  0  0  0  0
    8.7877    0.4372    2.6678 H   0  0  0  0  0  0  0  0  0  0  0  0
    7.8885    1.7273    4.4413 H   0  0  0  0  0  0  0  0  0  0  0  0
    5.6735    2.6427    4.2918 H   0  0  0  0  0  0  0  0  0  0  0  0
    0.0831    7.3374   -2.4116 H   0  0  0  0  0  0  0  0  0  0  0  0
    0.3426   10.0286    0.7617 H   0  0  0  0  0  0  0  0  0  0  0  0
    7.0396   -2.1223   -0.8739 H   0  0  0  0  0  0  0  0  0  0  0  0
    5.6678   -1.1547   -0.3638 H   0  0  0  0  0  0  0  0  0  0  0  0
    6.5708   -2.0896    0.8312 H   0  0  0  0  0  0  0  0  0  0  0  0
    8.1179    0.1078   -1.9378 H   0  0  0  0  0  0  0  0  0  0  0  0
    8.3448    1.5128   -0.8873 H   0  0  0  0  0  0  0  0  0  0  0  0
    6.7213    1.0169   -1.3778 H   0  0  0  0  0  0  0  0  0  0  0  0
    9.3903   -1.4464   -0.4527 H   0  0  0  0  0  0  0  0  0  0  0  0
    9.7894   -0.0689    0.5688 H   0  0  0  0  0  0  0  0  0  0  0  0
    9.0679   -1.5286    1.2792 H   0  0  0  0  0  0  0  0  0  0  0  0
   -3.7535   10.7820   -0.9097 H   0  0  0  0  0  0  0  0  0  0  0  0
   -4.0255    9.8226   -2.2369 H   0  0  0  0  0  0  0  0  0  0  0  0
   -3.2612    5.5411   -3.8829 H   0  0  0  0  0  0  0  0  0  0  0  0
   -2.9242    6.3338   -0.8663 H   0  0  0  0  0  0  0  0  0  0  0  0
   -3.8729    4.9041   -1.6274 H   0  0  0  0  0  0  0  0  0  0  0  0
   -1.8226    4.0772   -2.6557 H   0  0  0  0  0  0  0  0  0  0  0  0
   -0.8801    5.4503   -1.8295 H   0  0  0  0  0  0  0  0  0  0  0  0
   -1.9649    7.4078   -5.6234 H   0  0  0  0  0  0  0  0  0  0  0  0
   -0.4927    7.3020   -4.6829 H   0  0  0  0  0  0  0  0  0  0  0  0
   -1.2261    8.8735   -4.9719 H   0  0  0  0  0  0  0  0  0  0  0  0
   -4.3236    7.6995   -4.6468 H   0  0  0  0  0  0  0  0  0  0  0  0
   -4.6539    8.1573   -2.9961 H   0  0  0  0  0  0  0  0  0  0  0  0
   -3.8743    9.3043   -4.1051 H   0  0  0  0  0  0  0  0  0  0  0  0
  1  2  1  0  0  0  0
  1 37  1  0  0  0  0
  1 38  1  0  0  0  0
  2  3  1  0  0  0  0
  2 11  1  0  0  0  0
  2 39  1  6  0  0  0
  3  4  1  0  0  0  0
  3  9  1  0  0  0  0
  3 40  1  1  0  0  0
  4  5  1  0  0  0  0
  4 10  1  0  0  0  0
  4 41  1  6  0  0  0
  5  6  1  0  0  0  0
  5 42  1  0  0  0  0
  5 43  1  0  0  0  0
  6  1  1  0  0  0  0
  6  7  2  0  0  0  0
  6  8  2  0  0  0  0
  9 44  1  0  0  0  0
 10 12  1  0  0  0  0
 10 45  1  0  0  0  0
 11 19  1  0  0  0  0
 11 46  1  0  0  0  0
 11 47  1  0  0  0  0
 12 13  1  0  0  0  0
 12 48  1  0  0  0  0
 12 49  1  0  0  0  0
 13 14  2  0  0  0  0
 14 15  1  0  0  0  0
 14 50  1  0  0  0  0
 15 16  2  0  0  0  0
 15 25  1  0  0  0  0
 16 17  1  0  0  0  0
 16 51  1  0  0  0  0
 17 18  2  0  0  0  0
 17 52  1  0  0  0  0
 18 13  1  0  0  0  0
 18 53  1  0  0  0  0
 19 20  2  0  0  0  0
 20 21  1  0  0  0  0
 20 54  1  0  0  0  0
 21 22  2  0  0  0  0
 21 31  1  0  0  0  0
 22 23  1  0  0  0  0
 23 24  2  0  0  0  0
 23 30  1  0  0  0  0
 24 19  1  0  0  0  0
 24 55  1  0  0  0  0
 25 26  1  0  0  0  0
 25 27  1  0  0  0  0
 25 28  1  0  0  0  0
 26 56  1  0  0  0  0
 26 57  1  0  0  0  0
 26 58  1  0  0  0  0
 27 59  1  0  0  0  0
 27 60  1  0  0  0  0
 27 61  1  0  0  0  0
 28 62  1  0  0  0  0
 28 63  1  0  0  0  0
 28 64  1  0  0  0  0
 29 22  1  0  0  0  0
 29 65  1  0  0  0  0
 29 66  1  0  0  0  0
 31 32  1  0  0  0  0
 31 35  1  0  0  0  0
 31 36  1  0  0  0  0
 32 33  1  0  0  0  0
 32 67  1  0  0  0  0
 33 34  1  0  0  0  0
 33 68  1  0  0  0  0
 33 69  1  0  0  0  0
 34 32  1  0  0  0  0
 34 70  1  0  0  0  0
 34 71  1  0  0  0  0
 35 72  1  0  0  0  0
 35 73  1  0  0  0  0
 35 74  1  0  0  0  0
 36 75  1  0  0  0  0
 36 76  1  0  0  0  0
 36 77  1  0  0  0  0
M  END
$$$$
Dataset (43)
 OpenBabel02101614293D

 77 80  0  0  0  0  0  0  0  0999 V2000
    0.5327    6.9327    1.1002 C   0  0  0  0  0  0  0  0  0  0  0  0
    1.8612    6.5015    0.4033 C   0  0  2  0  0  0  0  0  0  0  0  0
    2.7519    5.6040    1.3437 C   0  0  1  0  0  0  0  0  0  0  0  0
    2.0915    4.2669    1.8313 C   0  0  2  0  0  0  0  0  0  0  0  0
    0.7926    4.4909    2.6577 C   0  0  0  0  0  0  0  0  0  0  0  0
   -0.4019    5.4870    1.7066 S   0  0  0  0  0  0  0  0  0  0  0  0
   -1.6060    5.9581    2.6538 O   0  0  0  0  0  0  0  0  0  0  0  0
   -0.9685    4.6408    0.4681 O   0  0  0  0  0  0  0  0  0  0  0  0
    3.9454    5.2554    0.6353 O   0  0  0  0  0  0  0  0  0  0  0  0
    3.0763    3.4902    2.6416 N   0  0  0  0  0  0  0  0  0  0  0  0
    2.6472    7.7596   -0.1129 C   0  0  0  0  0  0  0  0  0  0  0  0
    2.7868    2.0459    2.8272 C   0  0  0  0  0  0  0  0  0  0  0  0
    3.8833    1.3600    3.5593 C   0  0  0  0  0  0  0  0  0  0  0  0
    4.8236    0.5425    2.8866 C   0  0  0  0  0  0  0  0  0  0  0  0
    5.8591   -0.1606    3.5644 C   0  0  0  0  0  0  0  0  0  0  0  0
    5.9103    0.0091    4.9742 C   0  0  0  0  0  0  0  0  0  0  0  0
    4.9895    0.8106    5.6663 C   0  0  0  0  0  0  0  0  0  0  0  0
    3.9836    1.4855    4.9612 C   0  0  0  0  0  0  0  0  0  0  0  0
    1.8894    8.5914   -1.0957 C   0  0  0  0  0  0  0  0  0  0  0  0
    1.8506    8.2400   -2.4634 C   0  0  0  0  0  0  0  0  0  0  0  0
    1.1174    8.9710   -3.4426 C   0  0  0  0  0  0  0  0  0  0  0  0
    0.4276   10.1329   -2.9743 C   0  0  0  0  0  0  0  0  0  0  0  0
    0.4573   10.4985   -1.6074 C   0  0  0  0  0  0  0  0  0  0  0  0
    1.1886    9.7397   -0.6805 C   0  0  0  0  0  0  0  0  0  0  0  0
    6.8458   -1.0284    2.7902 C   0  0  0  0  0  0  0  0  0  0  0  0
    7.8967   -1.7831    3.6834 C   0  0  0  0  0  0  0  0  0  0  0  0
    7.6616   -0.1291    1.8012 C   0  0  0  0  0  0  0  0  0  0  0  0
    6.0832   -2.1376    1.9858 C   0  0  0  0  0  0  0  0  0  0  0  0
   -0.2667   10.9581   -3.7858 N   0  0  0  0  0  0  0  0  0  0  0  0
   -0.1793   11.5527   -1.1638 F   0  0  0  0  0  0  0  0  0  0  0  0
    1.1623    8.5414   -4.9075 C   0  0  0  0  0  0  0  0  0  0  0  0
    2.2486    9.3703   -5.6631 C   0  0  0  0  0  0  0  0  0  0  0  0
    1.5546    6.9463   -5.1180 C   0  0  0  0  0  0  0  0  0  0  0  0
   -0.2695    8.6662   -5.7226 C   0  0  0  0  0  0  0  0  0  0  0  0
    2.8376   10.6228   -5.3371 C   0  0  0  0  0  0  0  0  0  0  0  0
    3.7816   10.9111   -6.3040 C   0  0  0  0  0  0  0  0  0  0  0  0
    3.7639    9.9017   -7.1762 N   0  0  0  0  0  0  0  0  0  0  0  0
    2.8854    9.0171   -6.8294 N   0  0  0  0  0  0  0  0  0  0  0  0
    0.7504    7.5822    1.9513 H   0  0  0  0  0  0  0  0  0  0  0  0
   -0.1214    7.4645    0.4108 H   0  0  0  0  0  0  0  0  0  0  0  0
    1.5987    5.8962   -0.4707 H   0  0  0  0  0  0  0  0  0  0  0  0
    3.0468    6.1932    2.2179 H   0  0  0  0  0  0  0  0  0  0  0  0
    1.8429    3.6898    0.9333 H   0  0  0  0  0  0  0  0  0  0  0  0
    0.3016    3.5484    2.8976 H   0  0  0  0  0  0  0  0  0  0  0  0
    1.0193    5.0158    3.5870 H   0  0  0  0  0  0  0  0  0  0  0  0
    4.5089    4.7900    1.2880 H   0  0  0  0  0  0  0  0  0  0  0  0
    3.1302    3.9243    3.5668 H   0  0  0  0  0  0  0  0  0  0  0  0
    2.9472    8.3708    0.7446 H   0  0  0  0  0  0  0  0  0  0  0  0
    3.5783    7.4455   -0.5943 H   0  0  0  0  0  0  0  0  0  0  0  0
    1.8633    1.9104    3.3929 H   0  0  0  0  0  0  0  0  0  0  0  0
    2.6351    1.5844    1.8487 H   0  0  0  0  0  0  0  0  0  0  0  0
    4.7431    0.4601    1.8722 H   0  0  0  0  0  0  0  0  0  0  0  0
    6.6267   -0.4415    5.5374 H   0  0  0  0  0  0  0  0  0  0  0  0
    5.0553    0.8966    6.6838 H   0  0  0  0  0  0  0  0  0  0  0  0
    3.3167    2.0592    5.4805 H   0  0  0  0  0  0  0  0  0  0  0  0
    2.3937    7.4220   -2.7325 H   0  0  0  0  0  0  0  0  0  0  0  0
    1.2032   10.0209    0.3066 H   0  0  0  0  0  0  0  0  0  0  0  0
    8.5678   -2.3965    3.0761 H   0  0  0  0  0  0  0  0  0  0  0  0
    8.5186   -1.0810    4.2429 H   0  0  0  0  0  0  0  0  0  0  0  0
    7.3995   -2.4464    4.3953 H   0  0  0  0  0  0  0  0  0  0  0  0
    8.3934   -0.7223    1.2482 H   0  0  0  0  0  0  0  0  0  0  0  0
    8.1996    0.6511    2.3447 H   0  0  0  0  0  0  0  0  0  0  0  0
    7.0172    0.3541    1.0664 H   0  0  0  0  0  0  0  0  0  0  0  0
    6.7859   -2.7915    1.4631 H   0  0  0  0  0  0  0  0  0  0  0  0
    5.4222   -1.7144    1.2295 H   0  0  0  0  0  0  0  0  0  0  0  0
    5.4807   -2.7551    2.6561 H   0  0  0  0  0  0  0  0  0  0  0  0
   -0.8453   11.6371   -3.4034 H   0  0  0  0  0  0  0  0  0  0  0  0
   -0.1761   10.9023   -4.7438 H   0  0  0  0  0  0  0  0  0  0  0  0
    0.9362    6.2338   -4.5164 H   0  0  0  0  0  0  0  0  0  0  0  0
    1.4511    6.5646   -6.1640 H   0  0  0  0  0  0  0  0  0  0  0  0
    2.6132    6.6849   -4.8724 H   0  0  0  0  0  0  0  0  0  0  0  0
   -1.1676    8.3389   -5.1415 H   0  0  0  0  0  0  0  0  0  0  0  0
   -0.3334    8.0652   -6.6638 H   0  0  0  0  0  0  0  0  0  0  0  0
   -0.5263    9.6837   -6.0999 H   0  0  0  0  0  0  0  0  0  0  0  0
    2.6147   11.2122   -4.5321 H   0  0  0  0  0  0  0  0  0  0  0  0
    4.3812   11.7347   -6.3427 H   0  0  0  0  0  0  0  0  0  0  0  0
    4.3322    9.8376   -7.9576 H   0  0  0  0  0  0  0  0  0  0  0  0
  1  2  1  0  0  0  0
  1 39  1  0  0  0  0
  1 40  1  0  0  0  0
  2  3  1  0  0  0  0
  2 11  1  0  0  0  0
  2 41  1  6  0  0  0
  3  4  1  0  0  0  0
  3  9  1  0  0  0  0
  3 42  1  1  0  0  0
  4  5  1  0  0  0  0
  4 10  1  0  0  0  0
  4 43  1  6  0  0  0
  5  6  1  0  0  0  0
  5 44  1  0  0  0  0
  5 45  1  0  0  0  0
  6  1  1  0  0  0  0
  6  7  2  0  0  0  0
  6  8  2  0  0  0  0
  9 46  1  0  0  0  0
 10 12  1  0  0  0  0
 10 47  1  0  0  0  0
 11 19  1  0  0  0  0
 11 48  1  0  0  0  0
 11 49  1  0  0  0  0
 12 13  1  0  0  0  0
 12 50  1  0  0  0  0
 12 51  1  0  0  0  0
 13 14  2  0  0  0  0
 14 15  1  0  0  0  0
 14 52  1  0  0  0  0
 15 16  2  0  0  0  0
 15 25  1  0  0  0  0
 16 17  1  0  0  0  0
 16 53  1  0  0  0  0
 17 18  2  0  0  0  0
 17 54  1  0  0  0  0
 18 13  1  0  0  0  0
 18 55  1  0  0  0  0
 19 20  2  0  0  0  0
 20 21  1  0  0  0  0
 20 56  1  0  0  0  0
 21 22  2  0  0  0  0
 21 31  1  0  0  0  0
 22 23  1  0  0  0  0
 23 24  2  0  0  0  0
 23 30  1  0  0  0  0
 24 19  1  0  0  0  0
 24 57  1  0  0  0  0
 25 26  1  0  0  0  0
 25 27  1  0  0  0  0
 25 28  1  0  0  0  0
 26 58  1  0  0  0  0
 26 59  1  0  0  0  0
 26 60  1  0  0  0  0
 27 61  1  0  0  0  0
 27 62  1  0  0  0  0
 27 63  1  0  0  0  0
 28 64  1  0  0  0  0
 28 65  1  0  0  0  0
 28 66  1  0  0  0  0
 29 22  1  0  0  0  0
 29 67  1  0  0  0  0
 29 68  1  0  0  0  0
 31 32  1  0  0  0  0
 31 33  1  0  0  0  0
 31 34  1  0  0  0  0
 32 35  1  0  0  0  0
 33 69  1  0  0  0  0
 33 70  1  0  0  0  0
 33 71  1  0  0  0  0
 34 72  1  0  0  0  0
 34 73  1  0  0  0  0
 34 74  1  0  0  0  0
 35 36  2  0  0  0  0
 35 75  1  0  0  0  0
 36 37  1  0  0  0  0
 36 76  1  0  0  0  0
 37 38  1  0  0  0  0
 37 77  1  0  0  0  0
 38 32  2  0  0  0  0
M  END
$$$$
Dataset (44)
 OpenBabel02101614293D

 77 80  0  0  0  0  0  0  0  0999 V2000
    0.5676    6.9532    1.0833 C   0  0  0  0  0  0  0  0  0  0  0  0
    1.8876    6.5025    0.3829 C   0  0  2  0  0  0  0  0  0  0  0  0
    2.7728    5.5908    1.3199 C   0  0  1  0  0  0  0  0  0  0  0  0
    2.1064    4.2514    1.8020 C   0  0  2  0  0  0  0  0  0  0  0  0
    0.8134    4.4986    2.6295 C   0  0  0  0  0  0  0  0  0  0  0  0
   -0.3771    5.5172    1.6914 S   0  0  0  0  0  0  0  0  0  0  0  0
   -1.5741    6.0071    2.6382 O   0  0  0  0  0  0  0  0  0  0  0  0
   -0.9488    4.6808    0.4491 O   0  0  0  0  0  0  0  0  0  0  0  0
    3.9836    5.2516    0.6388 O   0  0  0  0  0  0  0  0  0  0  0  0
    3.0888    3.4625    2.6123 N   0  0  0  0  0  0  0  0  0  0  0  0
    2.6670    7.7656   -0.1261 C   0  0  0  0  0  0  0  0  0  0  0  0
    2.7815    2.0256    2.8424 C   0  0  0  0  0  0  0  0  0  0  0  0
    3.8827    1.3424    3.5760 C   0  0  0  0  0  0  0  0  0  0  0  0
    4.8316    0.5400    2.8997 C   0  0  0  0  0  0  0  0  0  0  0  0
    5.8672   -0.1657    3.5743 C   0  0  0  0  0  0  0  0  0  0  0  0
    5.9197   -0.0094    4.9855 C   0  0  0  0  0  0  0  0  0  0  0  0
    4.9960    0.7897    5.6777 C   0  0  0  0  0  0  0  0  0  0  0  0
    3.9838    1.4610    4.9779 C   0  0  0  0  0  0  0  0  0  0  0  0
    1.9008    8.5956   -1.1087 C   0  0  0  0  0  0  0  0  0  0  0  0
    1.8593    8.2493   -2.4761 C   0  0  0  0  0  0  0  0  0  0  0  0
    1.1013    8.9697   -3.4453 C   0  0  0  0  0  0  0  0  0  0  0  0
    0.3847   10.1112   -2.9661 C   0  0  0  0  0  0  0  0  0  0  0  0
    0.4120   10.4703   -1.6001 C   0  0  0  0  0  0  0  0  0  0  0  0
    1.1782    9.7291   -0.6885 C   0  0  0  0  0  0  0  0  0  0  0  0
    6.8459   -1.0280    2.7890 C   0  0  0  0  0  0  0  0  0  0  0  0
    7.8944   -1.7873    3.6780 C   0  0  0  0  0  0  0  0  0  0  0  0
    7.6565   -0.1105    1.8108 C   0  0  0  0  0  0  0  0  0  0  0  0
    6.0575   -2.1263    1.9917 C   0  0  0  0  0  0  0  0  0  0  0  0
   -0.3086   10.9417   -3.7737 N   0  0  0  0  0  0  0  0  0  0  0  0
   -0.2498   11.5062   -1.1460 F   0  0  0  0  0  0  0  0  0  0  0  0
    1.1511    8.5573   -4.9115 C   0  0  0  0  0  0  0  0  0  0  0  0
    2.2430    9.3849   -5.6448 C   0  0  0  0  0  0  0  0  0  0  0  0
    1.5421    6.9651   -5.1306 C   0  0  0  0  0  0  0  0  0  0  0  0
   -0.2765    8.6744   -5.7356 C   0  0  0  0  0  0  0  0  0  0  0  0
    2.8232   10.6443   -5.3216 C   0  0  0  0  0  0  0  0  0  0  0  0
    3.8028   10.9473   -6.2507 C   0  0  0  0  0  0  0  0  0  0  0  0
    3.8252    9.8987   -7.1521 C   0  0  0  0  0  0  0  0  0  0  0  0
    2.8936    8.9871   -6.7933 O   0  0  0  0  0  0  0  0  0  0  0  0
    0.7952    7.5995    1.9338 H   0  0  0  0  0  0  0  0  0  0  0  0
   -0.0872    7.4933    0.3989 H   0  0  0  0  0  0  0  0  0  0  0  0
    1.6169    5.9083   -0.4967 H   0  0  0  0  0  0  0  0  0  0  0  0
    3.0579    6.1755    2.1990 H   0  0  0  0  0  0  0  0  0  0  0  0
    1.8392    3.6759    0.9093 H   0  0  0  0  0  0  0  0  0  0  0  0
    0.3166    3.5612    2.8771 H   0  0  0  0  0  0  0  0  0  0  0  0
    1.0617    5.0166    3.5571 H   0  0  0  0  0  0  0  0  0  0  0  0
    4.5515    4.8279    1.3179 H   0  0  0  0  0  0  0  0  0  0  0  0
    3.1756    3.9204    3.5232 H   0  0  0  0  0  0  0  0  0  0  0  0
    2.9511    8.3763    0.7353 H   0  0  0  0  0  0  0  0  0  0  0  0
    3.6051    7.4591   -0.5955 H   0  0  0  0  0  0  0  0  0  0  0  0
    1.8586    1.9204    3.4181 H   0  0  0  0  0  0  0  0  0  0  0  0
    2.6119    1.5386    1.8785 H   0  0  0  0  0  0  0  0  0  0  0  0
    4.7526    0.4710    1.8840 H   0  0  0  0  0  0  0  0  0  0  0  0
    6.6311   -0.4739    5.5470 H   0  0  0  0  0  0  0  0  0  0  0  0
    5.0567    0.8792    6.6944 H   0  0  0  0  0  0  0  0  0  0  0  0
    3.3136    2.0270    5.5042 H   0  0  0  0  0  0  0  0  0  0  0  0
    2.4261    7.4514   -2.7565 H   0  0  0  0  0  0  0  0  0  0  0  0
    1.1953   10.0140    0.2929 H   0  0  0  0  0  0  0  0  0  0  0  0
    8.5712   -2.3934    3.0701 H   0  0  0  0  0  0  0  0  0  0  0  0
    8.5069   -1.0799    4.2435 H   0  0  0  0  0  0  0  0  0  0  0  0
    7.3909   -2.4568    4.3814 H   0  0  0  0  0  0  0  0  0  0  0  0
    8.4036   -0.6839    1.2563 H   0  0  0  0  0  0  0  0  0  0  0  0
    8.1779    0.6712    2.3714 H   0  0  0  0  0  0  0  0  0  0  0  0
    7.0081    0.3750    1.0786 H   0  0  0  0  0  0  0  0  0  0  0  0
    6.7358   -2.7983    1.4600 H   0  0  0  0  0  0  0  0  0  0  0  0
    5.3904   -1.6898    1.2465 H   0  0  0  0  0  0  0  0  0  0  0  0
    5.4517   -2.7295    2.6741 H   0  0  0  0  0  0  0  0  0  0  0  0
   -0.8878   11.6225   -3.3926 H   0  0  0  0  0  0  0  0  0  0  0  0
   -0.2094   10.8897   -4.7303 H   0  0  0  0  0  0  0  0  0  0  0  0
    0.9185    6.2491   -4.5375 H   0  0  0  0  0  0  0  0  0  0  0  0
    1.4463    6.5978   -6.1829 H   0  0  0  0  0  0  0  0  0  0  0  0
    2.5967    6.6958   -4.8777 H   0  0  0  0  0  0  0  0  0  0  0  0
   -1.1696    8.2946   -5.1784 H   0  0  0  0  0  0  0  0  0  0  0  0
   -0.3065    8.1134   -6.7039 H   0  0  0  0  0  0  0  0  0  0  0  0
   -0.5677    9.6960   -6.0690 H   0  0  0  0  0  0  0  0  0  0  0  0
    2.5699   11.2335   -4.5295 H   0  0  0  0  0  0  0  0  0  0  0  0
    4.3962   11.7775   -6.2614 H   0  0  0  0  0  0  0  0  0  0  0  0
    4.4501    9.8180   -7.9548 H   0  0  0  0  0  0  0  0  0  0  0  0
  1  2  1  0  0  0  0
  1 39  1  0  0  0  0
  1 40  1  0  0  0  0
  2  3  1  0  0  0  0
  2 11  1  0  0  0  0
  2 41  1  6  0  0  0
  3  4  1  0  0  0  0
  3  9  1  0  0  0  0
  3 42  1  1  0  0  0
  4  5  1  0  0  0  0
  4 10  1  0  0  0  0
  4 43  1  6  0  0  0
  5  6  1  0  0  0  0
  5 44  1  0  0  0  0
  5 45  1  0  0  0  0
  6  1  1  0  0  0  0
  6  7  2  0  0  0  0
  6  8  2  0  0  0  0
  9 46  1  0  0  0  0
 10 12  1  0  0  0  0
 10 47  1  0  0  0  0
 11 19  1  0  0  0  0
 11 48  1  0  0  0  0
 11 49  1  0  0  0  0
 12 13  1  0  0  0  0
 12 50  1  0  0  0  0
 12 51  1  0  0  0  0
 13 14  2  0  0  0  0
 14 15  1  0  0  0  0
 14 52  1  0  0  0  0
 15 16  2  0  0  0  0
 15 25  1  0  0  0  0
 16 17  1  0  0  0  0
 16 53  1  0  0  0  0
 17 18  2  0  0  0  0
 17 54  1  0  0  0  0
 18 13  1  0  0  0  0
 18 55  1  0  0  0  0
 19 20  2  0  0  0  0
 20 21  1  0  0  0  0
 20 56  1  0  0  0  0
 21 22  2  0  0  0  0
 21 31  1  0  0  0  0
 22 23  1  0  0  0  0
 23 24  2  0  0  0  0
 23 30  1  0  0  0  0
 24 19  1  0  0  0  0
 24 57  1  0  0  0  0
 25 26  1  0  0  0  0
 25 27  1  0  0  0  0
 25 28  1  0  0  0  0
 26 58  1  0  0  0  0
 26 59  1  0  0  0  0
 26 60  1  0  0  0  0
 27 61  1  0  0  0  0
 27 62  1  0  0  0  0
 27 63  1  0  0  0  0
 28 64  1  0  0  0  0
 28 65  1  0  0  0  0
 28 66  1  0  0  0  0
 29 22  1  0  0  0  0
 29 67  1  0  0  0  0
 29 68  1  0  0  0  0
 31 32  1  0  0  0  0
 31 33  1  0  0  0  0
 31 34  1  0  0  0  0
 32 35  2  0  0  0  0
 33 69  1  0  0  0  0
 33 70  1  0  0  0  0
 33 71  1  0  0  0  0
 34 72  1  0  0  0  0
 34 73  1  0  0  0  0
 34 74  1  0  0  0  0
 35 36  1  0  0  0  0
 35 75  1  0  0  0  0
 36 37  2  0  0  0  0
 36 76  1  0  0  0  0
 37 38  1  0  0  0  0
 37 77  1  0  0  0  0
 38 32  1  0  0  0  0
M  END
$$$$
Dataset (45)
 OpenBabel02101614293D

 77 80  0  0  0  0  0  0  0  0999 V2000
    0.5731    6.9572    1.0809 C   0  0  0  0  0  0  0  0  0  0  0  0
    1.8945    6.5088    0.3826 C   0  0  2  0  0  0  0  0  0  0  0  0
    2.7758    5.5939    1.3212 C   0  0  1  0  0  0  0  0  0  0  0  0
    2.1077    4.2542    1.8018 C   0  0  2  0  0  0  0  0  0  0  0  0
    0.8173    4.5020    2.6313 C   0  0  0  0  0  0  0  0  0  0  0  0
   -0.3703    5.5203    1.6902 S   0  0  0  0  0  0  0  0  0  0  0  0
   -1.5692    6.0121    2.6335 O   0  0  0  0  0  0  0  0  0  0  0  0
   -0.9476    4.6866    0.4481 O   0  0  0  0  0  0  0  0  0  0  0  0
    3.9874    5.2550    0.6399 O   0  0  0  0  0  0  0  0  0  0  0  0
    3.0893    3.4627    2.6064 N   0  0  0  0  0  0  0  0  0  0  0  0
    2.6763    7.7732   -0.1248 C   0  0  0  0  0  0  0  0  0  0  0  0
    2.7775    2.0276    2.8411 C   0  0  0  0  0  0  0  0  0  0  0  0
    3.8753    1.3450    3.5791 C   0  0  0  0  0  0  0  0  0  0  0  0
    4.8271    0.5451    2.9049 C   0  0  0  0  0  0  0  0  0  0  0  0
    5.8625   -0.1611    3.5808 C   0  0  0  0  0  0  0  0  0  0  0  0
    5.9133   -0.0067    4.9925 C   0  0  0  0  0  0  0  0  0  0  0  0
    4.9890    0.7940    5.6818 C   0  0  0  0  0  0  0  0  0  0  0  0
    3.9767    1.4656    4.9810 C   0  0  0  0  0  0  0  0  0  0  0  0
    1.9112    8.5997   -1.1115 C   0  0  0  0  0  0  0  0  0  0  0  0
    1.8820    8.2550   -2.4800 C   0  0  0  0  0  0  0  0  0  0  0  0
    1.1122    8.9630   -3.4487 C   0  0  0  0  0  0  0  0  0  0  0  0
    0.3948   10.1068   -2.9769 C   0  0  0  0  0  0  0  0  0  0  0  0
    0.4153   10.4662   -1.6104 C   0  0  0  0  0  0  0  0  0  0  0  0
    1.1759    9.7259   -0.6951 C   0  0  0  0  0  0  0  0  0  0  0  0
    6.8410   -1.0239    2.7962 C   0  0  0  0  0  0  0  0  0  0  0  0
    7.8898   -1.7844    3.6835 C   0  0  0  0  0  0  0  0  0  0  0  0
    7.6516   -0.1084    1.8172 C   0  0  0  0  0  0  0  0  0  0  0  0
    6.0528   -2.1208    1.9985 C   0  0  0  0  0  0  0  0  0  0  0  0
   -0.2939   10.9385   -3.7874 N   0  0  0  0  0  0  0  0  0  0  0  0
   -0.2556   11.4956   -1.1586 F   0  0  0  0  0  0  0  0  0  0  0  0
    1.1543    8.5302   -4.9095 C   0  0  0  0  0  0  0  0  0  0  0  0
    2.2698    9.3387   -5.6601 C   0  0  0  0  0  0  0  0  0  0  0  0
    1.4779    6.9171   -5.0860 C   0  0  0  0  0  0  0  0  0  0  0  0
   -0.2687    8.6712   -5.7379 C   0  0  0  0  0  0  0  0  0  0  0  0
    2.9883    8.9914   -6.8362 C   0  0  0  0  0  0  0  0  0  0  0  0
    3.9129    9.9822   -7.1279 C   0  0  0  0  0  0  0  0  0  0  0  0
    3.8123   10.9697   -6.2170 O   0  0  0  0  0  0  0  0  0  0  0  0
    2.8434   10.6056   -5.3459 C   0  0  0  0  0  0  0  0  0  0  0  0
    0.8002    7.6047    1.9299 H   0  0  0  0  0  0  0  0  0  0  0  0
   -0.0777    7.4987    0.3943 H   0  0  0  0  0  0  0  0  0  0  0  0
    1.6264    5.9138   -0.4974 H   0  0  0  0  0  0  0  0  0  0  0  0
    3.0610    6.1774    2.2013 H   0  0  0  0  0  0  0  0  0  0  0  0
    1.8408    3.6810    0.9077 H   0  0  0  0  0  0  0  0  0  0  0  0
    0.3215    3.5645    2.8774 H   0  0  0  0  0  0  0  0  0  0  0  0
    1.0659    5.0224    3.5571 H   0  0  0  0  0  0  0  0  0  0  0  0
    4.5567    4.8347    1.3195 H   0  0  0  0  0  0  0  0  0  0  0  0
    3.1840    3.9230    3.5150 H   0  0  0  0  0  0  0  0  0  0  0  0
    2.9548    8.3854    0.7393 H   0  0  0  0  0  0  0  0  0  0  0  0
    3.6182    7.4650   -0.5894 H   0  0  0  0  0  0  0  0  0  0  0  0
    1.8575    1.9258    3.4198 H   0  0  0  0  0  0  0  0  0  0  0  0
    2.6044    1.5364    1.8797 H   0  0  0  0  0  0  0  0  0  0  0  0
    4.7513    0.4778    1.8892 H   0  0  0  0  0  0  0  0  0  0  0  0
    6.6231   -0.4733    5.5564 H   0  0  0  0  0  0  0  0  0  0  0  0
    5.0508    0.8835    6.6983 H   0  0  0  0  0  0  0  0  0  0  0  0
    3.3084    2.0350    5.5049 H   0  0  0  0  0  0  0  0  0  0  0  0
    2.4603    7.4645   -2.7597 H   0  0  0  0  0  0  0  0  0  0  0  0
    1.1852   10.0082    0.2873 H   0  0  0  0  0  0  0  0  0  0  0  0
    8.5640   -2.3894    3.0723 H   0  0  0  0  0  0  0  0  0  0  0  0
    8.5050   -1.0790    4.2481 H   0  0  0  0  0  0  0  0  0  0  0  0
    7.3879   -2.4560    4.3855 H   0  0  0  0  0  0  0  0  0  0  0  0
    8.3983   -0.6840    1.2646 H   0  0  0  0  0  0  0  0  0  0  0  0
    8.1727    0.6744    2.3760 H   0  0  0  0  0  0  0  0  0  0  0  0
    7.0021    0.3743    1.0841 H   0  0  0  0  0  0  0  0  0  0  0  0
    6.7323   -2.7920    1.4676 H   0  0  0  0  0  0  0  0  0  0  0  0
    5.3874   -1.6826    1.2527 H   0  0  0  0  0  0  0  0  0  0  0  0
    5.4464   -2.7243    2.6797 H   0  0  0  0  0  0  0  0  0  0  0  0
   -0.8772   11.6163   -3.4074 H   0  0  0  0  0  0  0  0  0  0  0  0
   -0.1828   10.8950   -4.7440 H   0  0  0  0  0  0  0  0  0  0  0  0
    0.8477    6.2459   -4.4489 H   0  0  0  0  0  0  0  0  0  0  0  0
    1.3368    6.5164   -6.1204 H   0  0  0  0  0  0  0  0  0  0  0  0
    2.5284    6.6179   -4.8543 H   0  0  0  0  0  0  0  0  0  0  0  0
   -1.1710    8.3156   -5.1791 H   0  0  0  0  0  0  0  0  0  0  0  0
   -0.3079    8.1036   -6.7021 H   0  0  0  0  0  0  0  0  0  0  0  0
   -0.5359    9.6963   -6.0800 H   0  0  0  0  0  0  0  0  0  0  0  0
    2.8616    8.1378   -7.3813 H   0  0  0  0  0  0  0  0  0  0  0  0
    4.5686    9.9706   -7.9085 H   0  0  0  0  0  0  0  0  0  0  0  0
    2.5650   11.1815   -4.5507 H   0  0  0  0  0  0  0  0  0  0  0  0
  1  2  1  0  0  0  0
  1 39  1  0  0  0  0
  1 40  1  0  0  0  0
  2  3  1  0  0  0  0
  2 11  1  0  0  0  0
  2 41  1  6  0  0  0
  3  4  1  0  0  0  0
  3  9  1  0  0  0  0
  3 42  1  1  0  0  0
  4  5  1  0  0  0  0
  4 10  1  0  0  0  0
  4 43  1  6  0  0  0
  5  6  1  0  0  0  0
  5 44  1  0  0  0  0
  5 45  1  0  0  0  0
  6  1  1  0  0  0  0
  6  7  2  0  0  0  0
  6  8  2  0  0  0  0
  9 46  1  0  0  0  0
 10 12  1  0  0  0  0
 10 47  1  0  0  0  0
 11 19  1  0  0  0  0
 11 48  1  0  0  0  0
 11 49  1  0  0  0  0
 12 13  1  0  0  0  0
 12 50  1  0  0  0  0
 12 51  1  0  0  0  0
 13 14  2  0  0  0  0
 14 15  1  0  0  0  0
 14 52  1  0  0  0  0
 15 16  2  0  0  0  0
 15 25  1  0  0  0  0
 16 17  1  0  0  0  0
 16 53  1  0  0  0  0
 17 18  2  0  0  0  0
 17 54  1  0  0  0  0
 18 13  1  0  0  0  0
 18 55  1  0  0  0  0
 19 20  2  0  0  0  0
 20 21  1  0  0  0  0
 20 56  1  0  0  0  0
 21 22  2  0  0  0  0
 21 31  1  0  0  0  0
 22 23  1  0  0  0  0
 23 24  2  0  0  0  0
 23 30  1  0  0  0  0
 24 19  1  0  0  0  0
 24 57  1  0  0  0  0
 25 26  1  0  0  0  0
 25 27  1  0  0  0  0
 25 28  1  0  0  0  0
 26 58  1  0  0  0  0
 26 59  1  0  0  0  0
 26 60  1  0  0  0  0
 27 61  1  0  0  0  0
 27 62  1  0  0  0  0
 27 63  1  0  0  0  0
 28 64  1  0  0  0  0
 28 65  1  0  0  0  0
 28 66  1  0  0  0  0
 29 22  1  0  0  0  0
 29 67  1  0  0  0  0
 29 68  1  0  0  0  0
 31 32  1  0  0  0  0
 31 33  1  0  0  0  0
 31 34  1  0  0  0  0
 32 35  1  0  0  0  0
 33 69  1  0  0  0  0
 33 70  1  0  0  0  0
 33 71  1  0  0  0  0
 34 72  1  0  0  0  0
 34 73  1  0  0  0  0
 34 74  1  0  0  0  0
 35 36  2  0  0  0  0
 35 75  1  0  0  0  0
 36 37  1  0  0  0  0
 36 76  1  0  0  0  0
 37 38  1  0  0  0  0
 38 32  2  0  0  0  0
 38 77  1  0  0  0  0
M  END
$$$$
Dataset (46)
 OpenBabel02101614293D

 79 81  0  0  0  0  0  0  0  0999 V2000
    0.4928    6.7079    1.5987 C   0  0  0  0  0  0  0  0  0  0  0  0
   -0.0228    5.6179    0.6053 C   0  0  2  0  0  0  0  0  0  0  0  0
    1.0388    4.4733    0.3973 C   0  0  1  0  0  0  0  0  0  0  0  0
    1.4146    3.6747    1.6955 C   0  0  2  0  0  0  0  0  0  0  0  0
    2.0759    4.5696    2.7814 C   0  0  0  0  0  0  0  0  0  0  0  0
    0.9954    5.9803    3.1918 S   0  0  0  0  0  0  0  0  0  0  0  0
    1.7859    7.0660    4.0662 O   0  0  0  0  0  0  0  0  0  0  0  0
   -0.3018    5.4697    3.9837 O   0  0  0  0  0  0  0  0  0  0  0  0
    0.5434    3.5427   -0.5692 O   0  0  0  0  0  0  0  0  0  0  0  0
    2.3326    2.5588    1.3266 N   0  0  0  0  0  0  0  0  0  0  0  0
   -0.4735    6.2785   -0.7471 C   0  0  0  0  0  0  0  0  0  0  0  0
    2.5391    1.4879    2.3322 C   0  0  0  0  0  0  0  0  0  0  0  0
    3.4084    0.4201    1.7754 C   0  0  0  0  0  0  0  0  0  0  0  0
    2.8542   -0.7642    1.2389 C   0  0  0  0  0  0  0  0  0  0  0  0
    3.6495   -1.8343    0.7428 C   0  0  0  0  0  0  0  0  0  0  0  0
    5.0578   -1.6452    0.7874 C   0  0  0  0  0  0  0  0  0  0  0  0
    5.6315   -0.4656    1.2931 C   0  0  0  0  0  0  0  0  0  0  0  0
    4.8118    0.5612    1.7838 C   0  0  0  0  0  0  0  0  0  0  0  0
   -1.5402    7.3048   -0.5456 C   0  0  0  0  0  0  0  0  0  0  0  0
   -1.2109    8.6647   -0.3462 C   0  0  0  0  0  0  0  0  0  0  0  0
   -2.1480    9.6437    0.0967 C   0  0  0  0  0  0  0  0  0  0  0  0
   -3.5073    9.2001    0.1949 C   0  0  0  0  0  0  0  0  0  0  0  0
   -3.8657    7.8612   -0.0876 C   0  0  0  0  0  0  0  0  0  0  0  0
   -2.8881    6.9196   -0.4376 C   0  0  0  0  0  0  0  0  0  0  0  0
    2.9818   -3.0938    0.2049 C   0  0  0  0  0  0  0  0  0  0  0  0
    2.0838   -3.7300    1.3226 C   0  0  0  0  0  0  0  0  0  0  0  0
    2.1090   -2.7222   -1.0423 C   0  0  0  0  0  0  0  0  0  0  0  0
    3.9810   -4.2132   -0.2565 C   0  0  0  0  0  0  0  0  0  0  0  0
   -4.5287   10.0013    0.5729 N   0  0  0  0  0  0  0  0  0  0  0  0
   -5.1054    7.4513   -0.0085 F   0  0  0  0  0  0  0  0  0  0  0  0
   -1.6875   11.0575    0.4859 C   0  0  0  0  0  0  0  0  0  0  0  0
   -2.0622   11.4100    1.9857 C   0  0  0  0  0  0  0  0  0  0  0  0
   -2.3480   12.0950   -0.4948 C   0  0  0  0  0  0  0  0  0  0  0  0
   -0.1318   11.3104    0.3641 C   0  0  0  0  0  0  0  0  0  0  0  0
   -1.5672   10.4174    3.0854 C   0  0  0  0  0  0  0  0  0  0  0  0
   -2.0828   10.7414    4.5136 C   0  0  0  0  0  0  0  0  0  0  0  0
   -1.5539    9.8491    5.4153 F   0  0  0  0  0  0  0  0  0  0  0  0
   -3.4507   10.6414    4.5917 F   0  0  0  0  0  0  0  0  0  0  0  0
   -1.7154   12.0057    4.9125 F   0  0  0  0  0  0  0  0  0  0  0  0
    1.3495    7.2309    1.1691 H   0  0  0  0  0  0  0  0  0  0  0  0
   -0.2826    7.4362    1.8342 H   0  0  0  0  0  0  0  0  0  0  0  0
   -0.9116    5.1566    1.0488 H   0  0  0  0  0  0  0  0  0  0  0  0
    1.9464    4.9132   -0.0252 H   0  0  0  0  0  0  0  0  0  0  0  0
    0.4914    3.2503    2.1053 H   0  0  0  0  0  0  0  0  0  0  0  0
    2.2479    4.0172    3.7041 H   0  0  0  0  0  0  0  0  0  0  0  0
    3.0290    4.9550    2.4155 H   0  0  0  0  0  0  0  0  0  0  0  0
    1.3080    2.9711   -0.7948 H   0  0  0  0  0  0  0  0  0  0  0  0
    3.2439    2.9656    1.1054 H   0  0  0  0  0  0  0  0  0  0  0  0
   -0.8527    5.5122   -1.4286 H   0  0  0  0  0  0  0  0  0  0  0  0
    0.3939    6.7277   -1.2399 H   0  0  0  0  0  0  0  0  0  0  0  0
    3.0098    1.8853    3.2339 H   0  0  0  0  0  0  0  0  0  0  0  0
    1.5712    1.0737    2.6290 H   0  0  0  0  0  0  0  0  0  0  0  0
    1.8373   -0.8423    1.2153 H   0  0  0  0  0  0  0  0  0  0  0  0
    5.7015   -2.3611    0.4521 H   0  0  0  0  0  0  0  0  0  0  0  0
    6.6484   -0.3548    1.3078 H   0  0  0  0  0  0  0  0  0  0  0  0
    5.2471    1.4091    2.1543 H   0  0  0  0  0  0  0  0  0  0  0  0
   -0.2332    8.9097   -0.4861 H   0  0  0  0  0  0  0  0  0  0  0  0
   -3.1626    5.9460   -0.5998 H   0  0  0  0  0  0  0  0  0  0  0  0
    1.6340   -4.6677    0.9877 H   0  0  0  0  0  0  0  0  0  0  0  0
    1.2656   -3.0685    1.6114 H   0  0  0  0  0  0  0  0  0  0  0  0
    2.6789   -3.9398    2.2153 H   0  0  0  0  0  0  0  0  0  0  0  0
    1.6488   -3.6098   -1.4833 H   0  0  0  0  0  0  0  0  0  0  0  0
    2.7250   -2.2450   -1.8090 H   0  0  0  0  0  0  0  0  0  0  0  0
    1.3029   -2.0346   -0.7809 H   0  0  0  0  0  0  0  0  0  0  0  0
    3.4492   -5.0934   -0.6271 H   0  0  0  0  0  0  0  0  0  0  0  0
    4.6221   -3.8546   -1.0649 H   0  0  0  0  0  0  0  0  0  0  0  0
    4.6129   -4.5355    0.5746 H   0  0  0  0  0  0  0  0  0  0  0  0
   -4.3754   10.9246    0.8069 H   0  0  0  0  0  0  0  0  0  0  0  0
   -5.4312    9.6481    0.6200 H   0  0  0  0  0  0  0  0  0  0  0  0
   -1.6743   12.4025    2.2310 H   0  0  0  0  0  0  0  0  0  0  0  0
   -3.1389   11.5078    2.0954 H   0  0  0  0  0  0  0  0  0  0  0  0
   -1.9582   13.0957   -0.2912 H   0  0  0  0  0  0  0  0  0  0  0  0
   -3.4593   12.1811   -0.2975 H   0  0  0  0  0  0  0  0  0  0  0  0
   -2.0271   11.8474   -1.5574 H   0  0  0  0  0  0  0  0  0  0  0  0
    0.1371   12.3201    0.6883 H   0  0  0  0  0  0  0  0  0  0  0  0
    0.4373   10.6108    0.9803 H   0  0  0  0  0  0  0  0  0  0  0  0
    0.2106   11.2035   -0.6683 H   0  0  0  0  0  0  0  0  0  0  0  0
   -1.8896    9.4047    2.8334 H   0  0  0  0  0  0  0  0  0  0  0  0
   -0.4755   10.4279    3.1168 H   0  0  0  0  0  0  0  0  0  0  0  0
  1  2  1  0  0  0  0
  1 40  1  0  0  0  0
  1 41  1  0  0  0  0
  2  3  1  0  0  0  0
  2 11  1  0  0  0  0
  2 42  1  1  0  0  0
  3  4  1  0  0  0  0
  3  9  1  0  0  0  0
  3 43  1  6  0  0  0
  4  5  1  0  0  0  0
  4 10  1  0  0  0  0
  4 44  1  1  0  0  0
  5  6  1  0  0  0  0
  5 45  1  0  0  0  0
  5 46  1  0  0  0  0
  6  1  1  0  0  0  0
  6  7  2  0  0  0  0
  6  8  2  0  0  0  0
  9 47  1  0  0  0  0
 10 12  1  0  0  0  0
 10 48  1  0  0  0  0
 11 19  1  0  0  0  0
 11 49  1  0  0  0  0
 11 50  1  0  0  0  0
 12 13  1  0  0  0  0
 12 51  1  0  0  0  0
 12 52  1  0  0  0  0
 13 14  2  0  0  0  0
 14 15  1  0  0  0  0
 14 53  1  0  0  0  0
 15 16  2  0  0  0  0
 15 25  1  0  0  0  0
 16 17  1  0  0  0  0
 16 54  1  0  0  0  0
 17 18  2  0  0  0  0
 17 55  1  0  0  0  0
 18 13  1  0  0  0  0
 18 56  1  0  0  0  0
 19 20  2  0  0  0  0
 20 21  1  0  0  0  0
 20 57  1  0  0  0  0
 21 22  2  0  0  0  0
 21 31  1  0  0  0  0
 22 23  1  0  0  0  0
 23 24  2  0  0  0  0
 23 30  1  0  0  0  0
 24 19  1  0  0  0  0
 24 58  1  0  0  0  0
 25 26  1  0  0  0  0
 25 27  1  0  0  0  0
 25 28  1  0  0  0  0
 26 59  1  0  0  0  0
 26 60  1  0  0  0  0
 26 61  1  0  0  0  0
 27 62  1  0  0  0  0
 27 63  1  0  0  0  0
 27 64  1  0  0  0  0
 28 65  1  0  0  0  0
 28 66  1  0  0  0  0
 28 67  1  0  0  0  0
 29 22  1  0  0  0  0
 29 68  1  0  0  0  0
 29 69  1  0  0  0  0
 31 32  1  0  0  0  0
 31 33  1  0  0  0  0
 31 34  1  0  0  0  0
 32 35  1  0  0  0  0
 32 70  1  0  0  0  0
 32 71  1  0  0  0  0
 33 72  1  0  0  0  0
 33 73  1  0  0  0  0
 33 74  1  0  0  0  0
 34 75  1  0  0  0  0
 34 76  1  0  0  0  0
 34 77  1  0  0  0  0
 35 36  1  0  0  0  0
 35 78  1  0  0  0  0
 35 79  1  0  0  0  0
 36 37  1  0  0  0  0
 36 38  1  0  0  0  0
 36 39  1  0  0  0  0
M  END
$$$$
Dataset (47)
 OpenBabel02101614293D

 80 82  0  0  0  0  0  0  0  0999 V2000
    6.1721   -2.5069    3.2074 C   0  0  0  0  0  0  0  0  0  0  0  0
    4.8299   -3.2452    3.5037 C   0  0  2  0  0  0  0  0  0  0  0  0
    3.6589   -2.2149    3.7139 C   0  0  1  0  0  0  0  0  0  0  0  0
    3.3361   -1.3099    2.4709 C   0  0  2  0  0  0  0  0  0  0  0  0
    4.5301   -0.3985    2.0644 C   0  0  0  0  0  0  0  0  0  0  0  0
    6.0258   -1.4004    1.7679 S   0  0  0  0  0  0  0  0  0  0  0  0
    7.3234   -0.4665    1.6573 O   0  0  0  0  0  0  0  0  0  0  0  0
    5.8509   -2.2752    0.4354 O   0  0  0  0  0  0  0  0  0  0  0  0
    2.4703   -2.9252    4.0706 O   0  0  0  0  0  0  0  0  0  0  0  0
    2.1387   -0.4786    2.7813 N   0  0  0  0  0  0  0  0  0  0  0  0
    5.0012   -4.2302    4.7155 C   0  0  0  0  0  0  0  0  0  0  0  0
    1.4951    0.2384    1.6550 C   0  0  0  0  0  0  0  0  0  0  0  0
    0.2606    0.9030    2.1368 C   0  0  0  0  0  0  0  0  0  0  0  0
   -0.9958    0.2668    2.0163 C   0  0  0  0  0  0  0  0  0  0  0  0
   -2.2113    0.8825    2.4261 C   0  0  0  0  0  0  0  0  0  0  0  0
   -2.1033    2.1816    2.9955 C   0  0  0  0  0  0  0  0  0  0  0  0
   -0.8611    2.8214    3.1516 C   0  0  0  0  0  0  0  0  0  0  0  0
    0.3144    2.1851    2.7249 C   0  0  0  0  0  0  0  0  0  0  0  0
    6.0462   -5.2669    4.4582 C   0  0  0  0  0  0  0  0  0  0  0  0
    7.3884   -5.0605    4.8509 C   0  0  0  0  0  0  0  0  0  0  0  0
    8.4674   -5.8877    4.4200 C   0  0  0  0  0  0  0  0  0  0  0  0
    8.0957   -7.0645    3.6922 C   0  0  0  0  0  0  0  0  0  0  0  0
    6.7453   -7.3301    3.3672 C   0  0  0  0  0  0  0  0  0  0  0  0
    5.7356   -6.4279    3.7290 C   0  0  0  0  0  0  0  0  0  0  0  0
   -3.5333    0.1491    2.2433 C   0  0  0  0  0  0  0  0  0  0  0  0
   -3.7359   -0.1792    0.7237 C   0  0  0  0  0  0  0  0  0  0  0  0
   -3.5120   -1.1744    3.0824 C   0  0  0  0  0  0  0  0  0  0  0  0
   -4.7947    0.9617    2.7038 C   0  0  0  0  0  0  0  0  0  0  0  0
    8.9831   -7.9807    3.2421 N   0  0  0  0  0  0  0  0  0  0  0  0
    6.3958   -8.3993    2.6982 F   0  0  0  0  0  0  0  0  0  0  0  0
    9.9280   -5.4857    4.6771 C   0  0  0  0  0  0  0  0  0  0  0  0
   10.7672   -5.3599    3.3357 C   0  0  0  0  0  0  0  0  0  0  0  0
   10.5852   -6.5611    5.6207 C   0  0  0  0  0  0  0  0  0  0  0  0
   10.1039   -4.1130    5.4378 C   0  0  0  0  0  0  0  0  0  0  0  0
   10.2591   -4.3797    2.2241 C   0  0  1  0  0  0  0  0  0  0  0  0
   11.1713   -4.3392    0.9659 C   0  0  0  0  0  0  0  0  0  0  0  0
   10.7048   -3.4058    0.0690 F   0  0  0  0  0  0  0  0  0  0  0  0
   11.1996   -5.5553    0.3232 F   0  0  0  0  0  0  0  0  0  0  0  0
   12.4607   -3.9876    1.2843 F   0  0  0  0  0  0  0  0  0  0  0  0
    8.9528   -4.7240    1.7675 O   0  0  0  0  0  0  0  0  0  0  0  0
    6.4800   -1.9177    4.0732 H   0  0  0  0  0  0  0  0  0  0  0  0
    6.9638   -3.2049    2.9595 H   0  0  0  0  0  0  0  0  0  0  0  0
    4.5753   -3.8503    2.6267 H   0  0  0  0  0  0  0  0  0  0  0  0
    3.9099   -1.5701    4.5617 H   0  0  0  0  0  0  0  0  0  0  0  0
    3.0956   -1.9697    1.6299 H   0  0  0  0  0  0  0  0  0  0  0  0
    4.3245    0.1484    1.1439 H   0  0  0  0  0  0  0  0  0  0  0  0
    4.7378    0.3177    2.8629 H   0  0  0  0  0  0  0  0  0  0  0  0
    1.8402   -2.2397    4.3772 H   0  0  0  0  0  0  0  0  0  0  0  0
    2.4134    0.2139    3.4814 H   0  0  0  0  0  0  0  0  0  0  0  0
    4.0552   -4.7358    4.9236 H   0  0  0  0  0  0  0  0  0  0  0  0
    5.2452   -3.6568    5.6143 H   0  0  0  0  0  0  0  0  0  0  0  0
    2.1675    0.9897    1.2362 H   0  0  0  0  0  0  0  0  0  0  0  0
    1.2547   -0.4643    0.8520 H   0  0  0  0  0  0  0  0  0  0  0  0
   -1.0153   -0.6719    1.6134 H   0  0  0  0  0  0  0  0  0  0  0  0
   -2.9224    2.6971    3.3156 H   0  0  0  0  0  0  0  0  0  0  0  0
   -0.8136    3.7507    3.5743 H   0  0  0  0  0  0  0  0  0  0  0  0
    1.2123    2.6647    2.8405 H   0  0  0  0  0  0  0  0  0  0  0  0
    7.5605   -4.2380    5.4251 H   0  0  0  0  0  0  0  0  0  0  0  0
    4.7697   -6.6122    3.4449 H   0  0  0  0  0  0  0  0  0  0  0  0
   -4.6979   -0.6626    0.5430 H   0  0  0  0  0  0  0  0  0  0  0  0
   -2.9649   -0.8552    0.3526 H   0  0  0  0  0  0  0  0  0  0  0  0
   -3.6964    0.7369    0.1282 H   0  0  0  0  0  0  0  0  0  0  0  0
   -4.4613   -1.7091    3.0092 H   0  0  0  0  0  0  0  0  0  0  0  0
   -3.3262   -0.9549    4.1372 H   0  0  0  0  0  0  0  0  0  0  0  0
   -2.7325   -1.8546    2.7373 H   0  0  0  0  0  0  0  0  0  0  0  0
   -5.7142    0.3918    2.5457 H   0  0  0  0  0  0  0  0  0  0  0  0
   -4.7347    1.2036    3.7668 H   0  0  0  0  0  0  0  0  0  0  0  0
   -4.8805    1.8937    2.1414 H   0  0  0  0  0  0  0  0  0  0  0  0
    9.9280   -7.8845    3.4056 H   0  0  0  0  0  0  0  0  0  0  0  0
    8.6729   -8.7520    2.7425 H   0  0  0  0  0  0  0  0  0  0  0  0
   10.8877   -6.3353    2.8709 H   0  0  0  0  0  0  0  0  0  0  0  0
   11.7826   -5.0500    3.5994 H   0  0  0  0  0  0  0  0  0  0  0  0
   11.5972   -6.2472    5.8951 H   0  0  0  0  0  0  0  0  0  0  0  0
   10.7363   -7.5396    5.0722 H   0  0  0  0  0  0  0  0  0  0  0  0
    9.9948   -6.6059    6.5930 H   0  0  0  0  0  0  0  0  0  0  0  0
   11.1573   -3.8596    5.5769 H   0  0  0  0  0  0  0  0  0  0  0  0
    9.6411   -3.2915    4.8889 H   0  0  0  0  0  0  0  0  0  0  0  0
    9.6514   -4.1483    6.4320 H   0  0  0  0  0  0  0  0  0  0  0  0
   10.2126   -3.3662    2.6267 H   0  0  0  0  0  0  0  0  0  0  0  0
    8.3600   -4.5433    2.5217 H   0  0  0  0  0  0  0  0  0  0  0  0
  1  2  1  0  0  0  0
  1 41  1  0  0  0  0
  1 42  1  0  0  0  0
  2  3  1  0  0  0  0
  2 11  1  0  0  0  0
  2 43  1  6  0  0  0
  3  4  1  0  0  0  0
  3  9  1  0  0  0  0
  3 44  1  1  0  0  0
  4  5  1  0  0  0  0
  4 10  1  0  0  0  0
  4 45  1  6  0  0  0
  5  6  1  0  0  0  0
  5 46  1  0  0  0  0
  5 47  1  0  0  0  0
  6  1  1  0  0  0  0
  6  7  2  0  0  0  0
  6  8  2  0  0  0  0
  9 48  1  0  0  0  0
 10 12  1  0  0  0  0
 10 49  1  0  0  0  0
 11 19  1  0  0  0  0
 11 50  1  0  0  0  0
 11 51  1  0  0  0  0
 12 13  1  0  0  0  0
 12 52  1  0  0  0  0
 12 53  1  0  0  0  0
 13 14  2  0  0  0  0
 14 15  1  0  0  0  0
 14 54  1  0  0  0  0
 15 16  2  0  0  0  0
 15 25  1  0  0  0  0
 16 17  1  0  0  0  0
 16 55  1  0  0  0  0
 17 18  2  0  0  0  0
 17 56  1  0  0  0  0
 18 13  1  0  0  0  0
 18 57  1  0  0  0  0
 19 20  2  0  0  0  0
 20 21  1  0  0  0  0
 20 58  1  0  0  0  0
 21 22  2  0  0  0  0
 21 31  1  0  0  0  0
 22 23  1  0  0  0  0
 23 24  2  0  0  0  0
 23 30  1  0  0  0  0
 24 19  1  0  0  0  0
 24 59  1  0  0  0  0
 25 26  1  0  0  0  0
 25 27  1  0  0  0  0
 25 28  1  0  0  0  0
 26 60  1  0  0  0  0
 26 61  1  0  0  0  0
 26 62  1  0  0  0  0
 27 63  1  0  0  0  0
 27 64  1  0  0  0  0
 27 65  1  0  0  0  0
 28 66  1  0  0  0  0
 28 67  1  0  0  0  0
 28 68  1  0  0  0  0
 29 22  1  0  0  0  0
 29 69  1  0  0  0  0
 29 70  1  0  0  0  0
 31 32  1  0  0  0  0
 31 33  1  0  0  0  0
 31 34  1  0  0  0  0
 32 35  1  0  0  0  0
 32 71  1  0  0  0  0
 32 72  1  0  0  0  0
 33 73  1  0  0  0  0
 33 74  1  0  0  0  0
 33 75  1  0  0  0  0
 34 76  1  0  0  0  0
 34 77  1  0  0  0  0
 34 78  1  0  0  0  0
 35 36  1  0  0  0  0
 35 40  1  0  0  0  0
 35 79  1  1  0  0  0
 36 37  1  0  0  0  0
 36 38  1  0  0  0  0
 36 39  1  0  0  0  0
 40 80  1  0  0  0  0
M  END
$$$$
Dataset (48)
 OpenBabel02101614293D

 83 85  0  0  0  0  0  0  0  0999 V2000
    2.8461   -2.6149    0.7139 C   0  0  0  0  0  0  0  0  0  0  0  0
    3.6895   -2.5799   -0.5995 C   0  0  2  0  0  0  0  0  0  0  0  0
    4.6035   -3.8551   -0.7253 C   0  0  1  0  0  0  0  0  0  0  0  0
    3.8398   -5.2240   -0.7879 C   0  0  2  0  0  0  0  0  0  0  0  0
    2.9565   -5.5100    0.4581 C   0  0  0  0  0  0  0  0  0  0  0  0
    1.8170   -4.1207    0.7752 S   0  0  0  0  0  0  0  0  0  0  0  0
    1.1352   -4.2750    2.2171 O   0  0  0  0  0  0  0  0  0  0  0  0
    0.6943   -4.0517   -0.3677 O   0  0  0  0  0  0  0  0  0  0  0  0
    5.3809   -3.7485   -1.9220 O   0  0  0  0  0  0  0  0  0  0  0  0
    4.8359   -6.3204   -0.9463 N   0  0  0  0  0  0  0  0  0  0  0  0
    4.5130   -1.2463   -0.6910 C   0  0  0  0  0  0  0  0  0  0  0  0
    4.3347   -7.6083   -1.4774 C   0  0  0  0  0  0  0  0  0  0  0  0
    5.4546   -8.5740   -1.5842 C   0  0  0  0  0  0  0  0  0  0  0  0
    6.0294   -8.8791   -2.8370 C   0  0  0  0  0  0  0  0  0  0  0  0
    7.0782   -9.8262   -2.9930 C   0  0  0  0  0  0  0  0  0  0  0  0
    7.5341  -10.4663   -1.8090 C   0  0  0  0  0  0  0  0  0  0  0  0
    6.9892  -10.1629   -0.5483 C   0  0  0  0  0  0  0  0  0  0  0  0
    5.9603   -9.2163   -0.4346 C   0  0  0  0  0  0  0  0  0  0  0  0
    3.6558   -0.0441   -0.9190 C   0  0  0  0  0  0  0  0  0  0  0  0
    3.1563    0.7191    0.1600 C   0  0  0  0  0  0  0  0  0  0  0  0
    2.2674    1.8211   -0.0034 C   0  0  0  0  0  0  0  0  0  0  0  0
    1.9808    2.1982   -1.3540 C   0  0  0  0  0  0  0  0  0  0  0  0
    2.4996    1.4666   -2.4462 C   0  0  0  0  0  0  0  0  0  0  0  0
    3.3173    0.3496   -2.2267 C   0  0  0  0  0  0  0  0  0  0  0  0
    7.6486  -10.0998   -4.3779 C   0  0  0  0  0  0  0  0  0  0  0  0
    8.7924  -11.1754   -4.4121 C   0  0  0  0  0  0  0  0  0  0  0  0
    8.2531   -8.7749   -4.9593 C   0  0  0  0  0  0  0  0  0  0  0  0
    6.5107  -10.6240   -5.3208 C   0  0  0  0  0  0  0  0  0  0  0  0
    1.2200    3.2649   -1.6892 N   0  0  0  0  0  0  0  0  0  0  0  0
    2.2441    1.8030   -3.6863 F   0  0  0  0  0  0  0  0  0  0  0  0
    1.6822    2.6167    1.2134 C   0  0  0  0  0  0  0  0  0  0  0  0
    0.0717    2.5212    1.1559 C   0  0  0  0  0  0  0  0  0  0  0  0
    2.0391    1.9017    2.6143 C   0  0  0  0  0  0  0  0  0  0  0  0
    2.2118    4.1949    1.2579 C   0  0  0  0  0  0  0  0  0  0  0  0
   -0.6379    1.1316    0.9664 C   0  0  1  0  0  0  0  0  0  0  0  0
   -2.0537    1.1165    1.6287 C   0  0  0  0  0  0  0  0  0  0  0  0
   -2.7201   -0.0608    1.3955 F   0  0  0  0  0  0  0  0  0  0  0  0
   -2.8448    2.1410    1.1605 F   0  0  0  0  0  0  0  0  0  0  0  0
   -1.9607    1.2422    2.9960 F   0  0  0  0  0  0  0  0  0  0  0  0
   -0.7660    0.8683   -0.4530 O   0  0  0  0  0  0  0  0  0  0  0  0
   -0.5940   -0.4950   -0.8865 C   0  0  0  0  0  0  0  0  0  0  0  0
    3.5052   -2.6109    1.5854 H   0  0  0  0  0  0  0  0  0  0  0  0
    2.1697   -1.7644    0.7855 H   0  0  0  0  0  0  0  0  0  0  0  0
    2.9950   -2.5912   -1.4475 H   0  0  0  0  0  0  0  0  0  0  0  0
    5.3015   -3.8682    0.1170 H   0  0  0  0  0  0  0  0  0  0  0  0
    3.1963   -5.1926   -1.6733 H   0  0  0  0  0  0  0  0  0  0  0  0
    2.3529   -6.4048    0.3122 H   0  0  0  0  0  0  0  0  0  0  0  0
    3.5855   -5.6512    1.3386 H   0  0  0  0  0  0  0  0  0  0  0  0
    6.0001   -4.5075   -1.9029 H   0  0  0  0  0  0  0  0  0  0  0  0
    5.2559   -6.4943   -0.0303 H   0  0  0  0  0  0  0  0  0  0  0  0
    5.1072   -1.1168    0.2194 H   0  0  0  0  0  0  0  0  0  0  0  0
    5.2349   -1.3034   -1.5113 H   0  0  0  0  0  0  0  0  0  0  0  0
    3.5682   -8.0323   -0.8278 H   0  0  0  0  0  0  0  0  0  0  0  0
    3.8750   -7.4340   -2.4538 H   0  0  0  0  0  0  0  0  0  0  0  0
    5.6686   -8.3907   -3.6578 H   0  0  0  0  0  0  0  0  0  0  0  0
    8.2758  -11.1652   -1.8351 H   0  0  0  0  0  0  0  0  0  0  0  0
    7.3410  -10.6339    0.2886 H   0  0  0  0  0  0  0  0  0  0  0  0
    5.5753   -9.0048    0.4898 H   0  0  0  0  0  0  0  0  0  0  0  0
    3.4657    0.4390    1.0880 H   0  0  0  0  0  0  0  0  0  0  0  0
    3.6749   -0.1737   -3.0307 H   0  0  0  0  0  0  0  0  0  0  0  0
    9.1697  -11.3167   -5.4288 H   0  0  0  0  0  0  0  0  0  0  0  0
    9.6364  -10.8706   -3.7882 H   0  0  0  0  0  0  0  0  0  0  0  0
    8.4289  -12.1437   -4.0576 H   0  0  0  0  0  0  0  0  0  0  0  0
    8.7066   -8.9449   -5.9390 H   0  0  0  0  0  0  0  0  0  0  0  0
    9.0229   -8.3789   -4.2909 H   0  0  0  0  0  0  0  0  0  0  0  0
    7.4902   -8.0051   -5.0890 H   0  0  0  0  0  0  0  0  0  0  0  0
    6.8989  -10.8525   -6.3165 H   0  0  0  0  0  0  0  0  0  0  0  0
    5.7173   -9.8858   -5.4490 H   0  0  0  0  0  0  0  0  0  0  0  0
    6.0624  -11.5336   -4.9114 H   0  0  0  0  0  0  0  0  0  0  0  0
    1.0582    3.4693   -2.6246 H   0  0  0  0  0  0  0  0  0  0  0  0
    0.8379    3.8364   -1.0129 H   0  0  0  0  0  0  0  0  0  0  0  0
   -0.2995    3.1829    0.3759 H   0  0  0  0  0  0  0  0  0  0  0  0
   -0.2963    2.9886    2.0721 H   0  0  0  0  0  0  0  0  0  0  0  0
    1.5197    2.3856    3.4454 H   0  0  0  0  0  0  0  0  0  0  0  0
    1.7851    0.8426    2.6355 H   0  0  0  0  0  0  0  0  0  0  0  0
    3.1068    2.0036    2.8142 H   0  0  0  0  0  0  0  0  0  0  0  0
    1.8596    4.6802    2.1704 H   0  0  0  0  0  0  0  0  0  0  0  0
    1.8501    4.7707    0.4090 H   0  0  0  0  0  0  0  0  0  0  0  0
    3.3026    4.2153    1.2559 H   0  0  0  0  0  0  0  0  0  0  0  0
   -0.0445    0.3584    1.4550 H   0  0  0  0  0  0  0  0  0  0  0  0
   -0.9281   -0.5744   -1.9215 H   0  0  0  0  0  0  0  0  0  0  0  0
   -1.1722   -1.1973   -0.2864 H   0  0  0  0  0  0  0  0  0  0  0  0
    0.4588   -0.7728   -0.8442 H   0  0  0  0  0  0  0  0  0  0  0  0
  1  2  1  0  0  0  0
  1 42  1  0  0  0  0
  1 43  1  0  0  0  0
  2  3  1  0  0  0  0
  2 11  1  0  0  0  0
  2 44  1  6  0  0  0
  3  4  1  0  0  0  0
  3  9  1  0  0  0  0
  3 45  1  1  0  0  0
  4  5  1  0  0  0  0
  4 10  1  0  0  0  0
  4 46  1  6  0  0  0
  5  6  1  0  0  0  0
  5 47  1  0  0  0  0
  5 48  1  0  0  0  0
  6  1  1  0  0  0  0
  6  7  2  0  0  0  0
  6  8  2  0  0  0  0
  9 49  1  0  0  0  0
 10 12  1  0  0  0  0
 10 50  1  0  0  0  0
 11 19  1  0  0  0  0
 11 51  1  0  0  0  0
 11 52  1  0  0  0  0
 12 13  1  0  0  0  0
 12 53  1  0  0  0  0
 12 54  1  0  0  0  0
 13 14  2  0  0  0  0
 14 15  1  0  0  0  0
 14 55  1  0  0  0  0
 15 16  2  0  0  0  0
 15 25  1  0  0  0  0
 16 17  1  0  0  0  0
 16 56  1  0  0  0  0
 17 18  2  0  0  0  0
 17 57  1  0  0  0  0
 18 13  1  0  0  0  0
 18 58  1  0  0  0  0
 19 20  2  0  0  0  0
 20 21  1  0  0  0  0
 20 59  1  0  0  0  0
 21 22  2  0  0  0  0
 21 31  1  0  0  0  0
 22 23  1  0  0  0  0
 23 24  2  0  0  0  0
 23 30  1  0  0  0  0
 24 19  1  0  0  0  0
 24 60  1  0  0  0  0
 25 26  1  0  0  0  0
 25 27  1  0  0  0  0
 25 28  1  0  0  0  0
 26 61  1  0  0  0  0
 26 62  1  0  0  0  0
 26 63  1  0  0  0  0
 27 64  1  0  0  0  0
 27 65  1  0  0  0  0
 27 66  1  0  0  0  0
 28 67  1  0  0  0  0
 28 68  1  0  0  0  0
 28 69  1  0  0  0  0
 29 22  1  0  0  0  0
 29 70  1  0  0  0  0
 29 71  1  0  0  0  0
 31 32  1  0  0  0  0
 31 33  1  0  0  0  0
 31 34  1  0  0  0  0
 32 35  1  0  0  0  0
 32 72  1  0  0  0  0
 32 73  1  0  0  0  0
 33 74  1  0  0  0  0
 33 75  1  0  0  0  0
 33 76  1  0  0  0  0
 34 77  1  0  0  0  0
 34 78  1  0  0  0  0
 34 79  1  0  0  0  0
 35 36  1  0  0  0  0
 35 40  1  0  0  0  0
 35 80  1  1  0  0  0
 36 37  1  0  0  0  0
 36 38  1  0  0  0  0
 36 39  1  0  0  0  0
 40 41  1  0  0  0  0
 41 81  1  0  0  0  0
 41 82  1  0  0  0  0
 41 83  1  0  0  0  0
M  END
$$$$
Dataset (49)
 OpenBabel02101614293D

 69 71  0  0  0  0  0  0  0  0999 V2000
   -4.1857   -3.3239    7.0440 C   0  0  0  0  0  0  0  0  0  0  0  0
   -4.1795   -3.0145    5.6721 C   0  0  0  0  0  0  0  0  0  0  0  0
   -3.5469   -1.8436    5.2135 C   0  0  0  0  0  0  0  0  0  0  0  0
   -2.9486   -0.9408    6.1242 C   0  0  0  0  0  0  0  0  0  0  0  0
   -3.0272   -1.2304    7.5087 C   0  0  0  0  0  0  0  0  0  0  0  0
   -3.5771   -2.4469    7.9654 C   0  0  0  0  0  0  0  0  0  0  0  0
   -2.1647    0.2341    5.6316 C   0  0  0  0  0  0  0  0  0  0  0  0
    0.0568   -0.7091    6.5289 C   0  0  0  0  0  0  0  0  0  0  0  0
   -0.6757   -0.1284    5.2770 C   0  0  2  0  0  0  0  0  0  0  0  0
    0.1262    1.0805    4.6604 C   0  0  1  0  0  0  0  0  0  0  0  0
    1.5549    0.7122    4.1212 C   0  0  2  0  0  0  0  0  0  0  0  0
    2.5054    0.2527    5.2650 C   0  0  0  0  0  0  0  0  0  0  0  0
    1.7817   -1.1608    6.1576 S   0  0  0  0  0  0  0  0  0  0  0  0
   -0.6224    1.6631    3.5913 O   0  0  0  0  0  0  0  0  0  0  0  0
    2.1348    1.8810    3.4009 N   0  0  0  0  0  0  0  0  0  0  0  0
    3.3652    1.6432    2.6066 C   0  0  0  0  0  0  0  0  0  0  0  0
    3.7819    2.8941    1.9289 C   0  0  0  0  0  0  0  0  0  0  0  0
    3.4217    3.1343    0.5852 C   0  0  0  0  0  0  0  0  0  0  0  0
    3.8462    4.2809   -0.1375 C   0  0  0  0  0  0  0  0  0  0  0  0
    4.6504    5.2104    0.5745 C   0  0  0  0  0  0  0  0  0  0  0  0
    4.9860    5.0110    1.9268 C   0  0  0  0  0  0  0  0  0  0  0  0
    4.5538    3.8606    2.6053 C   0  0  0  0  0  0  0  0  0  0  0  0
    3.4436    4.4497   -1.5956 C   0  0  0  0  0  0  0  0  0  0  0  0
    4.0138    5.7422   -2.2855 C   0  0  0  0  0  0  0  0  0  0  0  0
    1.8793    4.5265   -1.6912 C   0  0  0  0  0  0  0  0  0  0  0  0
    3.9669    3.2200   -2.4193 C   0  0  0  0  0  0  0  0  0  0  0  0
    2.5864   -1.4383    7.5155 O   0  0  0  0  0  0  0  0  0  0  0  0
    1.7993   -2.4637    5.2223 O   0  0  0  0  0  0  0  0  0  0  0  0
   -3.4844   -2.7861    9.2916 O   0  0  0  0  0  0  0  0  0  0  0  0
   -2.2695   -3.5185    9.5845 C   0  0  0  0  0  0  0  0  0  0  0  0
   -2.1990   -3.8365   11.0971 C   0  0  0  0  0  0  0  0  0  0  0  0
   -0.9721   -4.6944   11.4872 C   0  0  0  0  0  0  0  0  0  0  0  0
   -4.6204   -4.1936    7.3675 H   0  0  0  0  0  0  0  0  0  0  0  0
   -4.6189   -3.6524    5.0051 H   0  0  0  0  0  0  0  0  0  0  0  0
   -3.5146   -1.6602    4.2076 H   0  0  0  0  0  0  0  0  0  0  0  0
   -2.6315   -0.5791    8.1921 H   0  0  0  0  0  0  0  0  0  0  0  0
   -2.6716    0.6404    4.7510 H   0  0  0  0  0  0  0  0  0  0  0  0
   -2.1695    1.0304    6.3814 H   0  0  0  0  0  0  0  0  0  0  0  0
    0.0555    0.0247    7.3382 H   0  0  0  0  0  0  0  0  0  0  0  0
   -0.4142   -1.6262    6.8781 H   0  0  0  0  0  0  0  0  0  0  0  0
   -0.7130   -0.9138    4.5140 H   0  0  0  0  0  0  0  0  0  0  0  0
    0.2340    1.8569    5.4243 H   0  0  0  0  0  0  0  0  0  0  0  0
    1.4407   -0.1058    3.4029 H   0  0  0  0  0  0  0  0  0  0  0  0
    2.6724    1.0703    5.9700 H   0  0  0  0  0  0  0  0  0  0  0  0
    3.4687   -0.0835    4.8843 H   0  0  0  0  0  0  0  0  0  0  0  0
   -0.7533    0.9371    2.9465 H   0  0  0  0  0  0  0  0  0  0  0  0
    2.3423    2.6027    4.0914 H   0  0  0  0  0  0  0  0  0  0  0  0
    4.1892    1.3086    3.2391 H   0  0  0  0  0  0  0  0  0  0  0  0
    3.1752    0.8489    1.8776 H   0  0  0  0  0  0  0  0  0  0  0  0
    2.8324    2.4429    0.1254 H   0  0  0  0  0  0  0  0  0  0  0  0
    5.0092    6.0535    0.1222 H   0  0  0  0  0  0  0  0  0  0  0  0
    5.5548    5.7040    2.4165 H   0  0  0  0  0  0  0  0  0  0  0  0
    4.8111    3.7287    3.5891 H   0  0  0  0  0  0  0  0  0  0  0  0
    3.6914    5.8056   -3.3282 H   0  0  0  0  0  0  0  0  0  0  0  0
    3.6651    6.6460   -1.7805 H   0  0  0  0  0  0  0  0  0  0  0  0
    5.1060    5.7408   -2.2811 H   0  0  0  0  0  0  0  0  0  0  0  0
    1.5548    4.6962   -2.7209 H   0  0  0  0  0  0  0  0  0  0  0  0
    1.4957    5.3458   -1.0762 H   0  0  0  0  0  0  0  0  0  0  0  0
    1.4032    3.6031   -1.3513 H   0  0  0  0  0  0  0  0  0  0  0  0
    3.7392    3.3305   -3.4814 H   0  0  0  0  0  0  0  0  0  0  0  0
    3.5123    2.2821   -2.0915 H   0  0  0  0  0  0  0  0  0  0  0  0
    5.0502    3.1198   -2.3132 H   0  0  0  0  0  0  0  0  0  0  0  0
   -2.2521   -4.4599    9.0237 H   0  0  0  0  0  0  0  0  0  0  0  0
   -1.3866   -2.9284    9.3125 H   0  0  0  0  0  0  0  0  0  0  0  0
   -2.1617   -2.8972   11.6546 H   0  0  0  0  0  0  0  0  0  0  0  0
   -3.1065   -4.3693   11.3906 H   0  0  0  0  0  0  0  0  0  0  0  0
   -0.9850   -4.8910   12.5610 H   0  0  0  0  0  0  0  0  0  0  0  0
   -0.0449   -4.1729   11.2422 H   0  0  0  0  0  0  0  0  0  0  0  0
   -0.9900   -5.6511   10.9615 H   0  0  0  0  0  0  0  0  0  0  0  0
  1  2  2  0  0  0  0
  1 33  1  0  0  0  0
  2  3  1  0  0  0  0
  2 34  1  0  0  0  0
  3  4  2  0  0  0  0
  3 35  1  0  0  0  0
  4  5  1  0  0  0  0
  4  7  1  0  0  0  0
  5  6  2  0  0  0  0
  5 36  1  0  0  0  0
  6  1  1  0  0  0  0
  6 29  1  0  0  0  0
  7 37  1  0  0  0  0
  7 38  1  0  0  0  0
  8  9  1  0  0  0  0
  8 39  1  0  0  0  0
  8 40  1  0  0  0  0
  9 10  1  0  0  0  0
  9  7  1  0  0  0  0
  9 41  1  6  0  0  0
 10 11  1  0  0  0  0
 10 14  1  0  0  0  0
 10 42  1  1  0  0  0
 11 12  1  0  0  0  0
 11 15  1  0  0  0  0
 11 43  1  6  0  0  0
 12 13  1  0  0  0  0
 12 44  1  0  0  0  0
 12 45  1  0  0  0  0
 13  8  1  0  0  0  0
 13 27  2  0  0  0  0
 13 28  2  0  0  0  0
 14 46  1  0  0  0  0
 15 16  1  0  0  0  0
 15 47  1  0  0  0  0
 16 17  1  0  0  0  0
 16 48  1  0  0  0  0
 16 49  1  0  0  0  0
 17 18  2  0  0  0  0
 18 19  1  0  0  0  0
 18 50  1  0  0  0  0
 19 20  2  0  0  0  0
 19 23  1  0  0  0  0
 20 21  1  0  0  0  0
 20 51  1  0  0  0  0
 21 22  2  0  0  0  0
 21 52  1  0  0  0  0
 22 17  1  0  0  0  0
 22 53  1  0  0  0  0
 23 24  1  0  0  0  0
 23 25  1  0  0  0  0
 23 26  1  0  0  0  0
 24 54  1  0  0  0  0
 24 55  1  0  0  0  0
 24 56  1  0  0  0  0
 25 57  1  0  0  0  0
 25 58  1  0  0  0  0
 25 59  1  0  0  0  0
 26 60  1  0  0  0  0
 26 61  1  0  0  0  0
 26 62  1  0  0  0  0
 29 30  1  0  0  0  0
 30 31  1  0  0  0  0
 30 63  1  0  0  0  0
 30 64  1  0  0  0  0
 31 32  1  0  0  0  0
 31 65  1  0  0  0  0
 31 66  1  0  0  0  0
 32 67  1  0  0  0  0
 32 68  1  0  0  0  0
 32 69  1  0  0  0  0
M  END
$$$$
Dataset (50)
 OpenBabel02101614293D

 71 73  0  0  0  0  0  0  0  0999 V2000
   -1.8591   -5.3583    8.2213 C   0  0  0  0  0  0  0  0  0  0  0  0
   -0.6195   -5.9364    7.8840 C   0  0  0  0  0  0  0  0  0  0  0  0
    0.0522   -5.5482    6.7093 C   0  0  0  0  0  0  0  0  0  0  0  0
   -0.5182   -4.5986    5.8295 C   0  0  0  0  0  0  0  0  0  0  0  0
   -1.7890   -4.0657    6.1516 C   0  0  0  0  0  0  0  0  0  0  0  0
   -2.4266   -4.3858    7.3682 C   0  0  0  0  0  0  0  0  0  0  0  0
    0.2344   -4.1102    4.6338 C   0  0  0  0  0  0  0  0  0  0  0  0
    0.3870   -1.7099    5.5374 C   0  0  0  0  0  0  0  0  0  0  0  0
    1.1967   -2.9110    4.9561 C   0  0  2  0  0  0  0  0  0  0  0  0
    2.0586   -2.4791    3.7093 C   0  0  1  0  0  0  0  0  0  0  0  0
    3.1543   -1.3925    4.0009 C   0  0  2  0  0  0  0  0  0  0  0  0
    2.5376   -0.0440    4.4643 C   0  0  0  0  0  0  0  0  0  0  0  0
    1.4749   -0.2973    5.9271 S   0  0  0  0  0  0  0  0  0  0  0  0
    2.7031   -3.6259    3.1476 O   0  0  0  0  0  0  0  0  0  0  0  0
    3.9890   -1.1807    2.7828 N   0  0  0  0  0  0  0  0  0  0  0  0
    5.2655   -0.4442    2.9630 C   0  0  0  0  0  0  0  0  0  0  0  0
    6.0313   -0.3948    1.6921 C   0  0  0  0  0  0  0  0  0  0  0  0
    7.0923   -1.2954    1.4496 C   0  0  0  0  0  0  0  0  0  0  0  0
    7.8827   -1.2499    0.2674 C   0  0  0  0  0  0  0  0  0  0  0  0
    7.5384   -0.2528   -0.6870 C   0  0  0  0  0  0  0  0  0  0  0  0
    6.4774    0.6412   -0.4757 C   0  0  0  0  0  0  0  0  0  0  0  0
    5.7294    0.5701    0.7073 C   0  0  0  0  0  0  0  0  0  0  0  0
    9.0249   -2.2381    0.0748 C   0  0  0  0  0  0  0  0  0  0  0  0
    9.8383   -2.0379   -1.2529 C   0  0  0  0  0  0  0  0  0  0  0  0
    8.4434   -3.6924    0.0391 C   0  0  0  0  0  0  0  0  0  0  0  0
   10.0463   -2.0901    1.2550 C   0  0  0  0  0  0  0  0  0  0  0  0
    0.5941    1.0095    6.2185 O   0  0  0  0  0  0  0  0  0  0  0  0
    2.3778   -0.6530    7.2032 O   0  0  0  0  0  0  0  0  0  0  0  0
   -3.5762   -3.7223    7.7151 O   0  0  0  0  0  0  0  0  0  0  0  0
   -3.2920   -2.4985    8.4356 C   0  0  0  0  0  0  0  0  0  0  0  0
   -4.6151   -1.7833    8.7974 C   0  0  0  0  0  0  0  0  0  0  0  0
   -4.3892   -0.4962    9.6251 C   0  0  0  0  0  0  0  0  0  0  0  0
   -2.4849   -5.7277    9.3606 N   0  0  0  0  0  0  0  0  0  0  0  0
   -0.1944   -6.6344    8.5000 H   0  0  0  0  0  0  0  0  0  0  0  0
    0.9666   -5.9601    6.5075 H   0  0  0  0  0  0  0  0  0  0  0  0
   -2.2430   -3.4005    5.5202 H   0  0  0  0  0  0  0  0  0  0  0  0
    0.8081   -4.9461    4.2250 H   0  0  0  0  0  0  0  0  0  0  0  0
   -0.4659   -3.8115    3.8480 H   0  0  0  0  0  0  0  0  0  0  0  0
   -0.3659   -1.3814    4.8171 H   0  0  0  0  0  0  0  0  0  0  0  0
   -0.1136   -1.9830    6.4667 H   0  0  0  0  0  0  0  0  0  0  0  0
    1.8911   -3.2541    5.7324 H   0  0  0  0  0  0  0  0  0  0  0  0
    1.3833   -2.0979    2.9378 H   0  0  0  0  0  0  0  0  0  0  0  0
    3.7956   -1.7796    4.7994 H   0  0  0  0  0  0  0  0  0  0  0  0
    1.9386    0.3879    3.6600 H   0  0  0  0  0  0  0  0  0  0  0  0
    3.3103    0.6697    4.7478 H   0  0  0  0  0  0  0  0  0  0  0  0
    3.2838   -3.9751    3.8554 H   0  0  0  0  0  0  0  0  0  0  0  0
    3.4246   -0.6730    2.0980 H   0  0  0  0  0  0  0  0  0  0  0  0
    5.0794    0.5782    3.2933 H   0  0  0  0  0  0  0  0  0  0  0  0
    5.8586   -0.9279    3.7441 H   0  0  0  0  0  0  0  0  0  0  0  0
    7.2890   -2.0011    2.1626 H   0  0  0  0  0  0  0  0  0  0  0  0
    8.0491   -0.1494   -1.5634 H   0  0  0  0  0  0  0  0  0  0  0  0
    6.2524    1.3451   -1.1850 H   0  0  0  0  0  0  0  0  0  0  0  0
    4.9660    1.2347    0.8479 H   0  0  0  0  0  0  0  0  0  0  0  0
   10.6475   -2.7679   -1.3408 H   0  0  0  0  0  0  0  0  0  0  0  0
    9.1919   -2.1585   -2.1261 H   0  0  0  0  0  0  0  0  0  0  0  0
   10.2860   -1.0409   -1.2843 H   0  0  0  0  0  0  0  0  0  0  0  0
    9.2301   -4.4300   -0.1396 H   0  0  0  0  0  0  0  0  0  0  0  0
    7.7026   -3.7866   -0.7602 H   0  0  0  0  0  0  0  0  0  0  0  0
    7.9595   -3.9565    0.9810 H   0  0  0  0  0  0  0  0  0  0  0  0
   10.9075   -2.7496    1.1222 H   0  0  0  0  0  0  0  0  0  0  0  0
    9.5949   -2.3435    2.2152 H   0  0  0  0  0  0  0  0  0  0  0  0
   10.4118   -1.0611    1.3145 H   0  0  0  0  0  0  0  0  0  0  0  0
   -2.7476   -2.7155    9.3624 H   0  0  0  0  0  0  0  0  0  0  0  0
   -2.6853   -1.8182    7.8251 H   0  0  0  0  0  0  0  0  0  0  0  0
   -5.1442   -1.5216    7.8762 H   0  0  0  0  0  0  0  0  0  0  0  0
   -5.2470   -2.4654    9.3738 H   0  0  0  0  0  0  0  0  0  0  0  0
   -5.3496   -0.0308    9.8575 H   0  0  0  0  0  0  0  0  0  0  0  0
   -3.7837    0.2179    9.0618 H   0  0  0  0  0  0  0  0  0  0  0  0
   -3.8808   -0.7302   10.5638 H   0  0  0  0  0  0  0  0  0  0  0  0
   -2.0768   -6.3834    9.9487 H   0  0  0  0  0  0  0  0  0  0  0  0
   -3.3445   -5.3412    9.5954 H   0  0  0  0  0  0  0  0  0  0  0  0
  1  2  2  0  0  0  0
  1 33  1  0  0  0  0
  2  3  1  0  0  0  0
  2 34  1  0  0  0  0
  3  4  2  0  0  0  0
  3 35  1  0  0  0  0
  4  5  1  0  0  0  0
  4  7  1  0  0  0  0
  5  6  2  0  0  0  0
  5 36  1  0  0  0  0
  6  1  1  0  0  0  0
  6 29  1  0  0  0  0
  7 37  1  0  0  0  0
  7 38  1  0  0  0  0
  8  9  1  0  0  0  0
  8 39  1  0  0  0  0
  8 40  1  0  0  0  0
  9 10  1  0  0  0  0
  9  7  1  0  0  0  0
  9 41  1  1  0  0  0
 10 11  1  0  0  0  0
 10 14  1  0  0  0  0
 10 42  1  6  0  0  0
 11 12  1  0  0  0  0
 11 15  1  0  0  0  0
 11 43  1  1  0  0  0
 12 13  1  0  0  0  0
 12 44  1  0  0  0  0
 12 45  1  0  0  0  0
 13  8  1  0  0  0  0
 13 27  2  0  0  0  0
 13 28  2  0  0  0  0
 14 46  1  0  0  0  0
 15 16  1  0  0  0  0
 15 47  1  0  0  0  0
 16 17  1  0  0  0  0
 16 48  1  0  0  0  0
 16 49  1  0  0  0  0
 17 18  2  0  0  0  0
 18 19  1  0  0  0  0
 18 50  1  0  0  0  0
 19 20  2  0  0  0  0
 19 23  1  0  0  0  0
 20 21  1  0  0  0  0
 20 51  1  0  0  0  0
 21 22  2  0  0  0  0
 21 52  1  0  0  0  0
 22 17  1  0  0  0  0
 22 53  1  0  0  0  0
 23 24  1  0  0  0  0
 23 25  1  0  0  0  0
 23 26  1  0  0  0  0
 24 54  1  0  0  0  0
 24 55  1  0  0  0  0
 24 56  1  0  0  0  0
 25 57  1  0  0  0  0
 25 58  1  0  0  0  0
 25 59  1  0  0  0  0
 26 60  1  0  0  0  0
 26 61  1  0  0  0  0
 26 62  1  0  0  0  0
 29 30  1  0  0  0  0
 30 31  1  0  0  0  0
 30 63  1  0  0  0  0
 30 64  1  0  0  0  0
 31 32  1  0  0  0  0
 31 65  1  0  0  0  0
 31 66  1  0  0  0  0
 32 67  1  0  0  0  0
 32 68  1  0  0  0  0
 32 69  1  0  0  0  0
 33 70  1  0  0  0  0
 33 71  1  0  0  0  0
M  END
$$$$
Dataset (51)
 OpenBabel02101614293D

 68 70  0  0  0  0  0  0  0  0999 V2000
   -1.8640   -5.3501    8.2305 C   0  0  0  0  0  0  0  0  0  0  0  0
   -0.6220   -5.9272    7.8998 C   0  0  0  0  0  0  0  0  0  0  0  0
    0.0503   -5.5403    6.7250 C   0  0  0  0  0  0  0  0  0  0  0  0
   -0.5212   -4.5955    5.8423 C   0  0  0  0  0  0  0  0  0  0  0  0
   -1.7955   -4.0646    6.1572 C   0  0  0  0  0  0  0  0  0  0  0  0
   -2.4363   -4.3850    7.3725 C   0  0  0  0  0  0  0  0  0  0  0  0
    0.2333   -4.1134    4.6438 C   0  0  0  0  0  0  0  0  0  0  0  0
    0.3930   -1.7118    5.5287 C   0  0  0  0  0  0  0  0  0  0  0  0
    1.2011   -2.9143    4.9510 C   0  0  2  0  0  0  0  0  0  0  0  0
    2.0604   -2.4779    3.7027 C   0  0  1  0  0  0  0  0  0  0  0  0
    3.1622   -1.3967    3.9998 C   0  0  2  0  0  0  0  0  0  0  0  0
    2.5437   -0.0437    4.4572 C   0  0  0  0  0  0  0  0  0  0  0  0
    1.4782   -0.2999    5.9177 S   0  0  0  0  0  0  0  0  0  0  0  0
    2.6959   -3.6252    3.1311 O   0  0  0  0  0  0  0  0  0  0  0  0
    4.0097   -1.1948    2.7881 N   0  0  0  0  0  0  0  0  0  0  0  0
    5.2757   -0.4383    2.9692 C   0  0  0  0  0  0  0  0  0  0  0  0
    6.0327   -0.3863    1.6919 C   0  0  0  0  0  0  0  0  0  0  0  0
    7.0885   -1.2909    1.4411 C   0  0  0  0  0  0  0  0  0  0  0  0
    7.8818   -1.2444    0.2616 C   0  0  0  0  0  0  0  0  0  0  0  0
    7.5434   -0.2419   -0.6867 C   0  0  0  0  0  0  0  0  0  0  0  0
    6.4748    0.6469   -0.4742 C   0  0  0  0  0  0  0  0  0  0  0  0
    5.7215    0.5765    0.7087 C   0  0  0  0  0  0  0  0  0  0  0  0
    9.0222   -2.2365    0.0728 C   0  0  0  0  0  0  0  0  0  0  0  0
    9.8409   -2.0398   -1.2537 C   0  0  0  0  0  0  0  0  0  0  0  0
    8.4375   -3.6917    0.0404 C   0  0  0  0  0  0  0  0  0  0  0  0
   10.0356   -2.0846    1.2615 C   0  0  0  0  0  0  0  0  0  0  0  0
    0.5949    1.0060    6.2053 O   0  0  0  0  0  0  0  0  0  0  0  0
    2.3758   -0.6618    7.1971 O   0  0  0  0  0  0  0  0  0  0  0  0
   -3.5916   -3.7278    7.7155 O   0  0  0  0  0  0  0  0  0  0  0  0
   -3.3262   -2.5013    8.4357 C   0  0  0  0  0  0  0  0  0  0  0  0
   -2.4883   -5.7191    9.3676 N   0  0  0  0  0  0  0  0  0  0  0  0
   -4.6451   -1.7831    8.7923 C   0  0  0  0  0  0  0  0  0  0  0  0
   -0.1924   -6.6212    8.5176 H   0  0  0  0  0  0  0  0  0  0  0  0
    0.9673   -5.9448    6.5186 H   0  0  0  0  0  0  0  0  0  0  0  0
   -2.2420   -3.3945    5.5243 H   0  0  0  0  0  0  0  0  0  0  0  0
    0.8043   -4.9520    4.2351 H   0  0  0  0  0  0  0  0  0  0  0  0
   -0.4678   -3.8118    3.8599 H   0  0  0  0  0  0  0  0  0  0  0  0
   -0.3614   -1.3823    4.8118 H   0  0  0  0  0  0  0  0  0  0  0  0
   -0.0986   -1.9771    6.4628 H   0  0  0  0  0  0  0  0  0  0  0  0
    1.9018   -3.2520    5.7227 H   0  0  0  0  0  0  0  0  0  0  0  0
    1.3881   -2.0795    2.9375 H   0  0  0  0  0  0  0  0  0  0  0  0
    3.7990   -1.7854    4.8024 H   0  0  0  0  0  0  0  0  0  0  0  0
    1.9486    0.3882    3.6493 H   0  0  0  0  0  0  0  0  0  0  0  0
    3.3115    0.6739    4.7446 H   0  0  0  0  0  0  0  0  0  0  0  0
    3.2637   -3.9897    3.8416 H   0  0  0  0  0  0  0  0  0  0  0  0
    3.4475   -0.6987    2.0933 H   0  0  0  0  0  0  0  0  0  0  0  0
    5.0828    0.5855    3.2980 H   0  0  0  0  0  0  0  0  0  0  0  0
    5.8768   -0.9172    3.7477 H   0  0  0  0  0  0  0  0  0  0  0  0
    7.2812   -2.0020    2.1478 H   0  0  0  0  0  0  0  0  0  0  0  0
    8.0635   -0.1397   -1.5580 H   0  0  0  0  0  0  0  0  0  0  0  0
    6.2475    1.3484   -1.1825 H   0  0  0  0  0  0  0  0  0  0  0  0
    4.9515    1.2366    0.8525 H   0  0  0  0  0  0  0  0  0  0  0  0
   10.6477   -2.7716   -1.3376 H   0  0  0  0  0  0  0  0  0  0  0  0
    9.2012   -2.1565   -2.1319 H   0  0  0  0  0  0  0  0  0  0  0  0
   10.2939   -1.0459   -1.2885 H   0  0  0  0  0  0  0  0  0  0  0  0
    9.2178   -4.4356   -0.1379 H   0  0  0  0  0  0  0  0  0  0  0  0
    7.6919   -3.7881   -0.7529 H   0  0  0  0  0  0  0  0  0  0  0  0
    7.9565   -3.9524    0.9836 H   0  0  0  0  0  0  0  0  0  0  0  0
   10.8996   -2.7420    1.1416 H   0  0  0  0  0  0  0  0  0  0  0  0
    9.5766   -2.3359    2.2184 H   0  0  0  0  0  0  0  0  0  0  0  0
   10.3976   -1.0553    1.3251 H   0  0  0  0  0  0  0  0  0  0  0  0
   -2.7821   -2.7103    9.3626 H   0  0  0  0  0  0  0  0  0  0  0  0
   -2.7209   -1.8225    7.8266 H   0  0  0  0  0  0  0  0  0  0  0  0
   -2.0827   -6.3758    9.9546 H   0  0  0  0  0  0  0  0  0  0  0  0
   -3.3437   -5.3285    9.6036 H   0  0  0  0  0  0  0  0  0  0  0  0
   -4.3922   -0.6433    9.5167 F   0  0  0  0  0  0  0  0  0  0  0  0
   -5.3228   -1.4262    7.6528 F   0  0  0  0  0  0  0  0  0  0  0  0
   -5.4520   -2.6004    9.5449 F   0  0  0  0  0  0  0  0  0  0  0  0
  1  2  2  0  0  0  0
  1 31  1  0  0  0  0
  2  3  1  0  0  0  0
  2 33  1  0  0  0  0
  3  4  2  0  0  0  0
  3 34  1  0  0  0  0
  4  5  1  0  0  0  0
  4  7  1  0  0  0  0
  5  6  2  0  0  0  0
  5 35  1  0  0  0  0
  6  1  1  0  0  0  0
  6 29  1  0  0  0  0
  7 36  1  0  0  0  0
  7 37  1  0  0  0  0
  8  9  1  0  0  0  0
  8 38  1  0  0  0  0
  8 39  1  0  0  0  0
  9 10  1  0  0  0  0
  9  7  1  0  0  0  0
  9 40  1  1  0  0  0
 10 11  1  0  0  0  0
 10 14  1  0  0  0  0
 10 41  1  6  0  0  0
 11 12  1  0  0  0  0
 11 15  1  0  0  0  0
 11 42  1  1  0  0  0
 12 13  1  0  0  0  0
 12 43  1  0  0  0  0
 12 44  1  0  0  0  0
 13  8  1  0  0  0  0
 13 27  2  0  0  0  0
 13 28  2  0  0  0  0
 14 45  1  0  0  0  0
 15 16  1  0  0  0  0
 15 46  1  0  0  0  0
 16 17  1  0  0  0  0
 16 47  1  0  0  0  0
 16 48  1  0  0  0  0
 17 18  2  0  0  0  0
 18 19  1  0  0  0  0
 18 49  1  0  0  0  0
 19 20  2  0  0  0  0
 19 23  1  0  0  0  0
 20 21  1  0  0  0  0
 20 50  1  0  0  0  0
 21 22  2  0  0  0  0
 21 51  1  0  0  0  0
 22 17  1  0  0  0  0
 22 52  1  0  0  0  0
 23 24  1  0  0  0  0
 23 25  1  0  0  0  0
 23 26  1  0  0  0  0
 24 53  1  0  0  0  0
 24 54  1  0  0  0  0
 24 55  1  0  0  0  0
 25 56  1  0  0  0  0
 25 57  1  0  0  0  0
 25 58  1  0  0  0  0
 26 59  1  0  0  0  0
 26 60  1  0  0  0  0
 26 61  1  0  0  0  0
 29 30  1  0  0  0  0
 30 32  1  0  0  0  0
 30 62  1  0  0  0  0
 30 63  1  0  0  0  0
 31 64  1  0  0  0  0
 31 65  1  0  0  0  0
 32 66  1  0  0  0  0
 32 67  1  0  0  0  0
 32 68  1  0  0  0  0
M  END
$$$$
Dataset (52)
 OpenBabel02101614293D

 71 73  0  0  0  0  0  0  0  0999 V2000
   -4.0349   -3.8951    5.6065 C   0  0  0  0  0  0  0  0  0  0  0  0
   -3.3604   -3.4387    6.7596 C   0  0  0  0  0  0  0  0  0  0  0  0
   -2.7408   -2.1736    6.7652 C   0  0  0  0  0  0  0  0  0  0  0  0
   -2.7693   -1.3422    5.6202 C   0  0  0  0  0  0  0  0  0  0  0  0
   -3.4864   -1.7895    4.4861 C   0  0  0  0  0  0  0  0  0  0  0  0
   -4.0880   -3.0672    4.4617 C   0  0  0  0  0  0  0  0  0  0  0  0
   -2.0089   -0.0529    5.5906 C   0  0  0  0  0  0  0  0  0  0  0  0
    0.2703   -1.2115    5.7214 C   0  0  0  0  0  0  0  0  0  0  0  0
   -0.5882   -0.1767    4.9306 C   0  0  2  0  0  0  0  0  0  0  0  0
    0.1538    1.2091    4.8007 C   0  0  1  0  0  0  0  0  0  0  0  0
    1.5213    1.1732    4.0229 C   0  0  2  0  0  0  0  0  0  0  0  0
    2.5826    0.2986    4.7515 C   0  0  0  0  0  0  0  0  0  0  0  0
    1.9380   -1.3907    5.0041 S   0  0  0  0  0  0  0  0  0  0  0  0
   -0.7056    2.1486    4.1487 O   0  0  0  0  0  0  0  0  0  0  0  0
    2.0360    2.5655    3.8431 N   0  0  0  0  0  0  0  0  0  0  0  0
    3.1481    2.7563    2.8728 C   0  0  0  0  0  0  0  0  0  0  0  0
    3.4931    4.1966    2.7472 C   0  0  0  0  0  0  0  0  0  0  0  0
    2.9940    4.9699    1.6742 C   0  0  0  0  0  0  0  0  0  0  0  0
    3.3392    6.3372    1.4798 C   0  0  0  0  0  0  0  0  0  0  0  0
    4.2093    6.9098    2.4466 C   0  0  0  0  0  0  0  0  0  0  0  0
    4.6961    6.1712    3.5375 C   0  0  0  0  0  0  0  0  0  0  0  0
    4.3407    4.8224    3.6865 C   0  0  0  0  0  0  0  0  0  0  0  0
    2.7821    7.1036    0.2866 C   0  0  0  0  0  0  0  0  0  0  0  0
    3.2858    8.5867    0.1735 C   0  0  0  0  0  0  0  0  0  0  0  0
    1.2195    7.1569    0.3984 C   0  0  0  0  0  0  0  0  0  0  0  0
    3.2105    6.3763   -1.0354 C   0  0  0  0  0  0  0  0  0  0  0  0
    2.8803   -2.2043    6.0124 O   0  0  0  0  0  0  0  0  0  0  0  0
    1.8324   -2.1555    3.5992 O   0  0  0  0  0  0  0  0  0  0  0  0
   -4.7273   -3.4847    3.3223 O   0  0  0  0  0  0  0  0  0  0  0  0
   -3.8506   -4.1347    2.3774 C   0  0  0  0  0  0  0  0  0  0  0  0
   -4.6673   -4.6001    1.1491 C   0  0  0  0  0  0  0  0  0  0  0  0
   -3.8011   -5.3310    0.0982 C   0  0  0  0  0  0  0  0  0  0  0  0
   -4.6109   -5.1176    5.5929 N   0  0  0  0  0  0  0  0  0  0  0  0
   -3.2819   -4.1822    7.8313 F   0  0  0  0  0  0  0  0  0  0  0  0
   -2.2420   -1.8666    7.6057 H   0  0  0  0  0  0  0  0  0  0  0  0
   -3.5586   -1.1916    3.6578 H   0  0  0  0  0  0  0  0  0  0  0  0
   -2.6073    0.6849    5.0520 H   0  0  0  0  0  0  0  0  0  0  0  0
   -1.8903    0.3367    6.6052 H   0  0  0  0  0  0  0  0  0  0  0  0
    0.3748   -0.8983    6.7624 H   0  0  0  0  0  0  0  0  0  0  0  0
   -0.1888   -2.2001    5.6984 H   0  0  0  0  0  0  0  0  0  0  0  0
   -0.7311   -0.5628    3.9158 H   0  0  0  0  0  0  0  0  0  0  0  0
    0.3390    1.6012    5.8055 H   0  0  0  0  0  0  0  0  0  0  0  0
    1.3268    0.7449    3.0333 H   0  0  0  0  0  0  0  0  0  0  0  0
    2.8275    0.7414    5.7212 H   0  0  0  0  0  0  0  0  0  0  0  0
    3.4978    0.2091    4.1660 H   0  0  0  0  0  0  0  0  0  0  0  0
   -0.8792    1.7724    3.2602 H   0  0  0  0  0  0  0  0  0  0  0  0
    2.3578    2.8991    4.7542 H   0  0  0  0  0  0  0  0  0  0  0  0
    4.0436    2.2144    3.1860 H   0  0  0  0  0  0  0  0  0  0  0  0
    2.8547    2.3516    1.8986 H   0  0  0  0  0  0  0  0  0  0  0  0
    2.3603    4.5131    1.0167 H   0  0  0  0  0  0  0  0  0  0  0  0
    4.5073    7.8820    2.3868 H   0  0  0  0  0  0  0  0  0  0  0  0
    5.3114    6.6198    4.2212 H   0  0  0  0  0  0  0  0  0  0  0  0
    4.7111    4.2976    4.4815 H   0  0  0  0  0  0  0  0  0  0  0  0
    2.8618    9.0883   -0.6984 H   0  0  0  0  0  0  0  0  0  0  0  0
    2.9993    9.1656    1.0541 H   0  0  0  0  0  0  0  0  0  0  0  0
    4.3732    8.6209    0.0767 H   0  0  0  0  0  0  0  0  0  0  0  0
    0.7769    7.7356   -0.4159 H   0  0  0  0  0  0  0  0  0  0  0  0
    0.9186    7.6193    1.3422 H   0  0  0  0  0  0  0  0  0  0  0  0
    0.7795    6.1598    0.3593 H   0  0  0  0  0  0  0  0  0  0  0  0
    2.8769    6.9202   -1.9221 H   0  0  0  0  0  0  0  0  0  0  0  0
    2.7869    5.3736   -1.1003 H   0  0  0  0  0  0  0  0  0  0  0  0
    4.2988    6.2833   -1.0840 H   0  0  0  0  0  0  0  0  0  0  0  0
   -3.0712   -3.4448    2.0423 H   0  0  0  0  0  0  0  0  0  0  0  0
   -3.3716   -5.0055    2.8339 H   0  0  0  0  0  0  0  0  0  0  0  0
   -5.4623   -5.2723    1.4810 H   0  0  0  0  0  0  0  0  0  0  0  0
   -5.1323   -3.7304    0.6787 H   0  0  0  0  0  0  0  0  0  0  0  0
   -4.4195   -5.6427   -0.7459 H   0  0  0  0  0  0  0  0  0  0  0  0
   -3.3400   -6.2178    0.5378 H   0  0  0  0  0  0  0  0  0  0  0  0
   -3.0166   -4.6675   -0.2714 H   0  0  0  0  0  0  0  0  0  0  0  0
   -5.1072   -5.4145    4.8136 H   0  0  0  0  0  0  0  0  0  0  0  0
   -4.5319   -5.6995    6.3653 H   0  0  0  0  0  0  0  0  0  0  0  0
  1  2  2  0  0  0  0
  1 33  1  0  0  0  0
  2  3  1  0  0  0  0
  2 34  1  0  0  0  0
  3  4  2  0  0  0  0
  3 35  1  0  0  0  0
  4  5  1  0  0  0  0
  4  7  1  0  0  0  0
  5  6  2  0  0  0  0
  5 36  1  0  0  0  0
  6  1  1  0  0  0  0
  6 29  1  0  0  0  0
  7 37  1  0  0  0  0
  7 38  1  0  0  0  0
  8  9  1  0  0  0  0
  8 39  1  0  0  0  0
  8 40  1  0  0  0  0
  9 10  1  0  0  0  0
  9  7  1  0  0  0  0
  9 41  1  6  0  0  0
 10 11  1  0  0  0  0
 10 14  1  0  0  0  0
 10 42  1  1  0  0  0
 11 12  1  0  0  0  0
 11 15  1  0  0  0  0
 11 43  1  6  0  0  0
 12 13  1  0  0  0  0
 12 44  1  0  0  0  0
 12 45  1  0  0  0  0
 13  8  1  0  0  0  0
 13 27  2  0  0  0  0
 13 28  2  0  0  0  0
 14 46  1  0  0  0  0
 15 16  1  0  0  0  0
 15 47  1  0  0  0  0
 16 17  1  0  0  0  0
 16 48  1  0  0  0  0
 16 49  1  0  0  0  0
 17 18  2  0  0  0  0
 18 19  1  0  0  0  0
 18 50  1  0  0  0  0
 19 20  2  0  0  0  0
 19 23  1  0  0  0  0
 20 21  1  0  0  0  0
 20 51  1  0  0  0  0
 21 22  2  0  0  0  0
 21 52  1  0  0  0  0
 22 17  1  0  0  0  0
 22 53  1  0  0  0  0
 23 24  1  0  0  0  0
 23 25  1  0  0  0  0
 23 26  1  0  0  0  0
 24 54  1  0  0  0  0
 24 55  1  0  0  0  0
 24 56  1  0  0  0  0
 25 57  1  0  0  0  0
 25 58  1  0  0  0  0
 25 59  1  0  0  0  0
 26 60  1  0  0  0  0
 26 61  1  0  0  0  0
 26 62  1  0  0  0  0
 29 30  1  0  0  0  0
 30 31  1  0  0  0  0
 30 63  1  0  0  0  0
 30 64  1  0  0  0  0
 31 32  1  0  0  0  0
 31 65  1  0  0  0  0
 31 66  1  0  0  0  0
 32 67  1  0  0  0  0
 32 68  1  0  0  0  0
 32 69  1  0  0  0  0
 33 70  1  0  0  0  0
 33 71  1  0  0  0  0
M  END
$$$$
Dataset (53)
 OpenBabel02101614293D

 68 70  0  0  0  0  0  0  0  0999 V2000
   -4.0335   -3.8973    5.5919 C   0  0  0  0  0  0  0  0  0  0  0  0
   -3.3718   -3.4385    6.7518 C   0  0  0  0  0  0  0  0  0  0  0  0
   -2.7544   -2.1746    6.7567 C   0  0  0  0  0  0  0  0  0  0  0  0
   -2.7584   -1.3522    5.6032 C   0  0  0  0  0  0  0  0  0  0  0  0
   -3.4549   -1.8083    4.4603 C   0  0  0  0  0  0  0  0  0  0  0  0
   -4.0827   -3.0729    4.4445 C   0  0  0  0  0  0  0  0  0  0  0  0
   -2.0002   -0.0633    5.5765 C   0  0  0  0  0  0  0  0  0  0  0  0
    0.2800   -1.2213    5.7222 C   0  0  0  0  0  0  0  0  0  0  0  0
   -0.5770   -0.1890    4.9247 C   0  0  2  0  0  0  0  0  0  0  0  0
    0.1540    1.2026    4.7986 C   0  0  1  0  0  0  0  0  0  0  0  0
    1.5243    1.1729    4.0315 C   0  0  2  0  0  0  0  0  0  0  0  0
    2.5842    0.2940    4.7517 C   0  0  0  0  0  0  0  0  0  0  0  0
    1.9475   -1.3981    5.0031 S   0  0  0  0  0  0  0  0  0  0  0  0
   -0.7052    2.1370    4.1404 O   0  0  0  0  0  0  0  0  0  0  0  0
    2.0423    2.5637    3.8650 N   0  0  0  0  0  0  0  0  0  0  0  0
    3.1390    2.7603    2.8823 C   0  0  0  0  0  0  0  0  0  0  0  0
    3.4844    4.1986    2.7466 C   0  0  0  0  0  0  0  0  0  0  0  0
    2.9901    4.9660    1.6673 C   0  0  0  0  0  0  0  0  0  0  0  0
    3.3346    6.3345    1.4769 C   0  0  0  0  0  0  0  0  0  0  0  0
    4.1993    6.9114    2.4485 C   0  0  0  0  0  0  0  0  0  0  0  0
    4.6901    6.1733    3.5343 C   0  0  0  0  0  0  0  0  0  0  0  0
    4.3360    4.8245    3.6822 C   0  0  0  0  0  0  0  0  0  0  0  0
    2.7815    7.1019    0.2840 C   0  0  0  0  0  0  0  0  0  0  0  0
    3.2866    8.5854    0.1758 C   0  0  0  0  0  0  0  0  0  0  0  0
    1.2196    7.1601    0.3936 C   0  0  0  0  0  0  0  0  0  0  0  0
    3.2091    6.3852   -1.0437 C   0  0  0  0  0  0  0  0  0  0  0  0
    2.8945   -2.2145    6.0065 O   0  0  0  0  0  0  0  0  0  0  0  0
    1.8453   -2.1578    3.5956 O   0  0  0  0  0  0  0  0  0  0  0  0
   -4.7460   -3.4814    3.3145 O   0  0  0  0  0  0  0  0  0  0  0  0
   -3.8833   -4.1363    2.3606 C   0  0  0  0  0  0  0  0  0  0  0  0
   -4.7128   -4.5893    1.1438 C   0  0  0  0  0  0  0  0  0  0  0  0
   -4.6052   -5.1221    5.5748 N   0  0  0  0  0  0  0  0  0  0  0  0
   -3.3086   -4.1777    7.8291 F   0  0  0  0  0  0  0  0  0  0  0  0
   -2.2687   -1.8683    7.6037 H   0  0  0  0  0  0  0  0  0  0  0  0
   -3.5006   -1.2240    3.6210 H   0  0  0  0  0  0  0  0  0  0  0  0
   -2.5976    0.6738    5.0334 H   0  0  0  0  0  0  0  0  0  0  0  0
   -1.8882    0.3287    6.5919 H   0  0  0  0  0  0  0  0  0  0  0  0
    0.3833   -0.9009    6.7616 H   0  0  0  0  0  0  0  0  0  0  0  0
   -0.1797   -2.2106    5.7077 H   0  0  0  0  0  0  0  0  0  0  0  0
   -0.7163   -0.5791    3.9097 H   0  0  0  0  0  0  0  0  0  0  0  0
    0.3252    1.5977    5.8043 H   0  0  0  0  0  0  0  0  0  0  0  0
    1.3339    0.7516    3.0391 H   0  0  0  0  0  0  0  0  0  0  0  0
    2.8291    0.7290    5.7225 H   0  0  0  0  0  0  0  0  0  0  0  0
    3.4975    0.2111    4.1645 H   0  0  0  0  0  0  0  0  0  0  0  0
   -0.8626    1.7644    3.2475 H   0  0  0  0  0  0  0  0  0  0  0  0
    2.3722    2.8881    4.7769 H   0  0  0  0  0  0  0  0  0  0  0  0
    4.0336    2.2180    3.1908 H   0  0  0  0  0  0  0  0  0  0  0  0
    2.8373    2.3522    1.9145 H   0  0  0  0  0  0  0  0  0  0  0  0
    2.3633    4.5064    1.0038 H   0  0  0  0  0  0  0  0  0  0  0  0
    4.4952    7.8862    2.3927 H   0  0  0  0  0  0  0  0  0  0  0  0
    5.3096    6.6188    4.2173 H   0  0  0  0  0  0  0  0  0  0  0  0
    4.7125    4.3014    4.4747 H   0  0  0  0  0  0  0  0  0  0  0  0
    2.8654    9.0918   -0.6970 H   0  0  0  0  0  0  0  0  0  0  0  0
    2.9953    9.1591    1.0588 H   0  0  0  0  0  0  0  0  0  0  0  0
    4.3751    8.6155    0.0825 H   0  0  0  0  0  0  0  0  0  0  0  0
    0.7854    7.7397   -0.4242 H   0  0  0  0  0  0  0  0  0  0  0  0
    0.9226    7.6281    1.3364 H   0  0  0  0  0  0  0  0  0  0  0  0
    0.7752    6.1638    0.3571 H   0  0  0  0  0  0  0  0  0  0  0  0
    2.8726    6.9392   -1.9227 H   0  0  0  0  0  0  0  0  0  0  0  0
    2.7865    5.3821   -1.1164 H   0  0  0  0  0  0  0  0  0  0  0  0
    4.2979    6.2969   -1.0932 H   0  0  0  0  0  0  0  0  0  0  0  0
   -3.0998   -3.4546    2.0131 H   0  0  0  0  0  0  0  0  0  0  0  0
   -3.4103   -5.0192    2.8032 H   0  0  0  0  0  0  0  0  0  0  0  0
   -5.1745   -3.7261    0.6604 H   0  0  0  0  0  0  0  0  0  0  0  0
   -4.0706   -5.0949    0.4194 H   0  0  0  0  0  0  0  0  0  0  0  0
   -5.4961   -5.2810    1.4600 H   0  0  0  0  0  0  0  0  0  0  0  0
   -5.0741   -5.4307    4.7840 H   0  0  0  0  0  0  0  0  0  0  0  0
   -4.5356   -5.7065    6.3459 H   0  0  0  0  0  0  0  0  0  0  0  0
  1  2  2  0  0  0  0
  1 32  1  0  0  0  0
  2  3  1  0  0  0  0
  2 33  1  0  0  0  0
  3  4  2  0  0  0  0
  3 34  1  0  0  0  0
  4  5  1  0  0  0  0
  4  7  1  0  0  0  0
  5  6  2  0  0  0  0
  5 35  1  0  0  0  0
  6  1  1  0  0  0  0
  6 29  1  0  0  0  0
  7 36  1  0  0  0  0
  7 37  1  0  0  0  0
  8  9  1  0  0  0  0
  8 38  1  0  0  0  0
  8 39  1  0  0  0  0
  9 10  1  0  0  0  0
  9  7  1  0  0  0  0
  9 40  1  6  0  0  0
 10 11  1  0  0  0  0
 10 14  1  0  0  0  0
 10 41  1  1  0  0  0
 11 12  1  0  0  0  0
 11 15  1  0  0  0  0
 11 42  1  6  0  0  0
 12 13  1  0  0  0  0
 12 43  1  0  0  0  0
 12 44  1  0  0  0  0
 13  8  1  0  0  0  0
 13 27  2  0  0  0  0
 13 28  2  0  0  0  0
 14 45  1  0  0  0  0
 15 16  1  0  0  0  0
 15 46  1  0  0  0  0
 16 17  1  0  0  0  0
 16 47  1  0  0  0  0
 16 48  1  0  0  0  0
 17 18  2  0  0  0  0
 18 19  1  0  0  0  0
 18 49  1  0  0  0  0
 19 20  2  0  0  0  0
 19 23  1  0  0  0  0
 20 21  1  0  0  0  0
 20 50  1  0  0  0  0
 21 22  2  0  0  0  0
 21 51  1  0  0  0  0
 22 17  1  0  0  0  0
 22 52  1  0  0  0  0
 23 24  1  0  0  0  0
 23 25  1  0  0  0  0
 23 26  1  0  0  0  0
 24 53  1  0  0  0  0
 24 54  1  0  0  0  0
 24 55  1  0  0  0  0
 25 56  1  0  0  0  0
 25 57  1  0  0  0  0
 25 58  1  0  0  0  0
 26 59  1  0  0  0  0
 26 60  1  0  0  0  0
 26 61  1  0  0  0  0
 29 30  1  0  0  0  0
 30 31  1  0  0  0  0
 30 62  1  0  0  0  0
 30 63  1  0  0  0  0
 31 64  1  0  0  0  0
 31 65  1  0  0  0  0
 31 66  1  0  0  0  0
 32 67  1  0  0  0  0
 32 68  1  0  0  0  0
M  END
$$$$
Dataset (54)
 OpenBabel02101614293D

 72 75  0  0  0  0  0  0  0  0999 V2000
   -3.9378   -3.8504    5.6652 C   0  0  0  0  0  0  0  0  0  0  0  0
   -3.4961   -3.3385    6.9035 C   0  0  0  0  0  0  0  0  0  0  0  0
   -2.9087   -2.0606    6.9728 C   0  0  0  0  0  0  0  0  0  0  0  0
   -2.7406   -1.2731    5.8098 C   0  0  0  0  0  0  0  0  0  0  0  0
   -3.2410   -1.7707    4.5860 C   0  0  0  0  0  0  0  0  0  0  0  0
   -3.8048   -3.0620    4.4985 C   0  0  0  0  0  0  0  0  0  0  0  0
   -1.9805    0.0152    5.8475 C   0  0  0  0  0  0  0  0  0  0  0  0
    0.2392   -1.1366    6.3924 C   0  0  0  0  0  0  0  0  0  0  0  0
   -0.4773   -0.1501    5.4169 C   0  0  2  0  0  0  0  0  0  0  0  0
    0.2751    1.2313    5.3090 C   0  0  1  0  0  0  0  0  0  0  0  0
    1.7536    1.1595    4.7847 C   0  0  2  0  0  0  0  0  0  0  0  0
    2.6737    0.3355    5.7285 C   0  0  0  0  0  0  0  0  0  0  0  0
    2.0011   -1.3440    5.9723 S   0  0  0  0  0  0  0  0  0  0  0  0
   -0.4559    2.1012    4.4419 O   0  0  0  0  0  0  0  0  0  0  0  0
    2.2966    2.5421    4.6193 N   0  0  0  0  0  0  0  0  0  0  0  0
    3.5431    2.6959    3.8247 C   0  0  0  0  0  0  0  0  0  0  0  0
    3.9003    4.1304    3.6564 C   0  0  0  0  0  0  0  0  0  0  0  0
    3.5992    4.8255    2.4618 C   0  0  0  0  0  0  0  0  0  0  0  0
    3.9652    6.1840    2.2456 C   0  0  0  0  0  0  0  0  0  0  0  0
    4.6446    6.8333    3.3110 C   0  0  0  0  0  0  0  0  0  0  0  0
    4.9421    6.1685    4.5127 C   0  0  0  0  0  0  0  0  0  0  0  0
    4.5727    4.8269    4.6829 C   0  0  0  0  0  0  0  0  0  0  0  0
    3.6260    6.8659    0.9260 C   0  0  0  0  0  0  0  0  0  0  0  0
    4.1357    8.3478    0.8074 C   0  0  0  0  0  0  0  0  0  0  0  0
    2.0688    6.9076    0.7584 C   0  0  0  0  0  0  0  0  0  0  0  0
    4.2803    6.0744   -0.2596 C   0  0  0  0  0  0  0  0  0  0  0  0
    2.7632   -2.0919    7.1680 O   0  0  0  0  0  0  0  0  0  0  0  0
    2.1339   -2.1872    4.6153 O   0  0  0  0  0  0  0  0  0  0  0  0
   -4.2258   -3.5261    3.2788 O   0  0  0  0  0  0  0  0  0  0  0  0
   -3.2188   -4.3000    2.5884 C   0  0  0  0  0  0  0  0  0  0  0  0
   -4.4745   -5.0910    5.5935 N   0  0  0  0  0  0  0  0  0  0  0  0
   -3.5963   -4.0480    7.9959 F   0  0  0  0  0  0  0  0  0  0  0  0
   -2.0721   -3.5045    1.9180 C   0  0  0  0  0  0  0  0  0  0  0  0
   -2.5550   -3.9516    0.5285 C   0  0  0  0  0  0  0  0  0  0  0  0
   -3.6961   -4.7457    1.1889 C   0  0  0  0  0  0  0  0  0  0  0  0
   -2.5676   -1.7243    7.8768 H   0  0  0  0  0  0  0  0  0  0  0  0
   -3.1803   -1.1933    3.7445 H   0  0  0  0  0  0  0  0  0  0  0  0
   -2.0179    0.4427    6.8543 H   0  0  0  0  0  0  0  0  0  0  0  0
   -2.4852    0.7335    5.1943 H   0  0  0  0  0  0  0  0  0  0  0  0
    0.1734   -0.7663    7.4174 H   0  0  0  0  0  0  0  0  0  0  0  0
   -0.2107   -2.1290    6.3511 H   0  0  0  0  0  0  0  0  0  0  0  0
   -0.4707   -0.6014    4.4177 H   0  0  0  0  0  0  0  0  0  0  0  0
    0.2741    1.7067    6.2937 H   0  0  0  0  0  0  0  0  0  0  0  0
    1.7323    0.6732    3.8037 H   0  0  0  0  0  0  0  0  0  0  0  0
    2.7458    0.8279    6.7016 H   0  0  0  0  0  0  0  0  0  0  0  0
    3.6752    0.2266    5.3103 H   0  0  0  0  0  0  0  0  0  0  0  0
   -0.4579    1.6584    3.5672 H   0  0  0  0  0  0  0  0  0  0  0  0
    2.4667    2.9281    5.5512 H   0  0  0  0  0  0  0  0  0  0  0  0
    4.3733    2.1838    4.3152 H   0  0  0  0  0  0  0  0  0  0  0  0
    3.4087    2.2258    2.8473 H   0  0  0  0  0  0  0  0  0  0  0  0
    3.1017    4.3169    1.7309 H   0  0  0  0  0  0  0  0  0  0  0  0
    4.9425    7.8054    3.2401 H   0  0  0  0  0  0  0  0  0  0  0  0
    5.4332    6.6597    5.2635 H   0  0  0  0  0  0  0  0  0  0  0  0
    4.8088    4.3593    5.5612 H   0  0  0  0  0  0  0  0  0  0  0  0
    3.8682    8.7878   -0.1579 H   0  0  0  0  0  0  0  0  0  0  0  0
    3.6928    8.9751    1.5856 H   0  0  0  0  0  0  0  0  0  0  0  0
    5.2248    8.3923    0.8998 H   0  0  0  0  0  0  0  0  0  0  0  0
    1.7834    7.4311   -0.1573 H   0  0  0  0  0  0  0  0  0  0  0  0
    1.6109    7.4301    1.6026 H   0  0  0  0  0  0  0  0  0  0  0  0
    1.6397    5.9049    0.7088 H   0  0  0  0  0  0  0  0  0  0  0  0
    4.1009    6.5702   -1.2167 H   0  0  0  0  0  0  0  0  0  0  0  0
    3.8809    5.0624   -0.3423 H   0  0  0  0  0  0  0  0  0  0  0  0
    5.3615    5.9997   -0.1159 H   0  0  0  0  0  0  0  0  0  0  0  0
   -2.8539   -5.1553    3.1715 H   0  0  0  0  0  0  0  0  0  0  0  0
   -4.5211   -5.6512    6.3861 H   0  0  0  0  0  0  0  0  0  0  0  0
   -4.8083   -5.4323    4.7474 H   0  0  0  0  0  0  0  0  0  0  0  0
   -1.0799   -3.8873    2.1747 H   0  0  0  0  0  0  0  0  0  0  0  0
   -2.1390   -2.4231    2.0450 H   0  0  0  0  0  0  0  0  0  0  0  0
   -1.8325   -4.5827    0.0059 H   0  0  0  0  0  0  0  0  0  0  0  0
   -2.9089   -3.1235   -0.0936 H   0  0  0  0  0  0  0  0  0  0  0  0
   -3.6093   -5.8238    1.0273 H   0  0  0  0  0  0  0  0  0  0  0  0
   -4.6847   -4.3655    0.9147 H   0  0  0  0  0  0  0  0  0  0  0  0
  1  2  2  0  0  0  0
  1 31  1  0  0  0  0
  2  3  1  0  0  0  0
  2 32  1  0  0  0  0
  3  4  2  0  0  0  0
  3 36  1  0  0  0  0
  4  5  1  0  0  0  0
  4  7  1  0  0  0  0
  5  6  2  0  0  0  0
  5 37  1  0  0  0  0
  6  1  1  0  0  0  0
  6 29  1  0  0  0  0
  7 38  1  0  0  0  0
  7 39  1  0  0  0  0
  8  9  1  0  0  0  0
  8 40  1  0  0  0  0
  8 41  1  0  0  0  0
  9 10  1  0  0  0  0
  9  7  1  0  0  0  0
  9 42  1  6  0  0  0
 10 11  1  0  0  0  0
 10 14  1  0  0  0  0
 10 43  1  1  0  0  0
 11 12  1  0  0  0  0
 11 15  1  0  0  0  0
 11 44  1  6  0  0  0
 12 13  1  0  0  0  0
 12 45  1  0  0  0  0
 12 46  1  0  0  0  0
 13  8  1  0  0  0  0
 13 27  2  0  0  0  0
 13 28  2  0  0  0  0
 14 47  1  0  0  0  0
 15 16  1  0  0  0  0
 15 48  1  0  0  0  0
 16 17  1  0  0  0  0
 16 49  1  0  0  0  0
 16 50  1  0  0  0  0
 17 18  2  0  0  0  0
 18 19  1  0  0  0  0
 18 51  1  0  0  0  0
 19 20  2  0  0  0  0
 19 23  1  0  0  0  0
 20 21  1  0  0  0  0
 20 52  1  0  0  0  0
 21 22  2  0  0  0  0
 21 53  1  0  0  0  0
 22 17  1  0  0  0  0
 22 54  1  0  0  0  0
 23 24  1  0  0  0  0
 23 25  1  0  0  0  0
 23 26  1  0  0  0  0
 24 55  1  0  0  0  0
 24 56  1  0  0  0  0
 24 57  1  0  0  0  0
 25 58  1  0  0  0  0
 25 59  1  0  0  0  0
 25 60  1  0  0  0  0
 26 61  1  0  0  0  0
 26 62  1  0  0  0  0
 26 63  1  0  0  0  0
 29 30  1  0  0  0  0
 30 33  1  0  0  0  0
 30 64  1  0  0  0  0
 31 65  1  0  0  0  0
 31 66  1  0  0  0  0
 33 34  1  0  0  0  0
 33 67  1  0  0  0  0
 33 68  1  0  0  0  0
 34 35  1  0  0  0  0
 34 69  1  0  0  0  0
 34 70  1  0  0  0  0
 35 30  1  0  0  0  0
 35 71  1  0  0  0  0
 35 72  1  0  0  0  0
M  END
$$$$
Dataset (55)
 OpenBabel02101614293D

 70 73  0  0  0  0  0  0  0  0999 V2000
   -4.0764   -4.1122    5.6238 C   0  0  0  0  0  0  0  0  0  0  0  0
   -3.9675   -3.3619    4.4323 C   0  0  0  0  0  0  0  0  0  0  0  0
   -3.3104   -2.1177    4.4379 C   0  0  0  0  0  0  0  0  0  0  0  0
   -2.7762   -1.5901    5.6353 C   0  0  0  0  0  0  0  0  0  0  0  0
   -2.9609   -2.3132    6.8360 C   0  0  0  0  0  0  0  0  0  0  0  0
   -3.5377   -3.5978    6.8274 C   0  0  0  0  0  0  0  0  0  0  0  0
   -1.9165   -0.3692    5.6139 C   0  0  0  0  0  0  0  0  0  0  0  0
    0.1591   -1.7306    6.2677 C   0  0  0  0  0  0  0  0  0  0  0  0
   -0.4257   -0.7055    5.2471 C   0  0  2  0  0  0  0  0  0  0  0  0
    0.4845    0.5704    5.1303 C   0  0  1  0  0  0  0  0  0  0  0  0
    1.9375    0.2932    4.6027 C   0  0  2  0  0  0  0  0  0  0  0  0
    2.7590   -0.5940    5.5808 C   0  0  0  0  0  0  0  0  0  0  0  0
    1.8874   -2.1648    5.8915 S   0  0  0  0  0  0  0  0  0  0  0  0
   -0.1368    1.5216    4.2637 O   0  0  0  0  0  0  0  0  0  0  0  0
    2.6363    1.5891    4.3702 N   0  0  0  0  0  0  0  0  0  0  0  0
    3.9091    1.5385    3.6079 C   0  0  0  0  0  0  0  0  0  0  0  0
    4.4375    2.9084    3.4022 C   0  0  0  0  0  0  0  0  0  0  0  0
    4.2023    3.5972    2.1921 C   0  0  0  0  0  0  0  0  0  0  0  0
    4.7353    4.8893    1.9272 C   0  0  0  0  0  0  0  0  0  0  0  0
    5.5118    5.4790    2.9614 C   0  0  0  0  0  0  0  0  0  0  0  0
    5.7347    4.8246    4.1841 C   0  0  0  0  0  0  0  0  0  0  0  0
    5.2001    3.5473    4.4027 C   0  0  0  0  0  0  0  0  0  0  0  0
    4.4599    5.5641    0.5893 C   0  0  0  0  0  0  0  0  0  0  0  0
    5.1423    6.9673    0.4177 C   0  0  0  0  0  0  0  0  0  0  0  0
    2.9167    5.7834    0.4302 C   0  0  0  0  0  0  0  0  0  0  0  0
    4.9974    4.6532   -0.5672 C   0  0  0  0  0  0  0  0  0  0  0  0
    2.5387   -2.9378    7.1350 O   0  0  0  0  0  0  0  0  0  0  0  0
    1.9284   -3.0883    4.5820 O   0  0  0  0  0  0  0  0  0  0  0  0
   -3.5423   -4.3230    7.9918 O   0  0  0  0  0  0  0  0  0  0  0  0
   -2.4384   -5.2557    8.0699 C   0  0  0  0  0  0  0  0  0  0  0  0
   -4.6832   -5.3201    5.6101 N   0  0  0  0  0  0  0  0  0  0  0  0
   -4.4560   -3.8148    3.3067 F   0  0  0  0  0  0  0  0  0  0  0  0
   -2.3448   -5.9382    9.4382 C   0  0  0  0  0  0  0  0  0  0  0  0
   -1.0178   -5.4333    9.6487 O   0  0  0  0  0  0  0  0  0  0  0  0
   -1.0465   -4.7026    8.4142 C   0  0  0  0  0  0  0  0  0  0  0  0
   -3.2024   -1.6043    3.5596 H   0  0  0  0  0  0  0  0  0  0  0  0
   -2.6100   -1.9331    7.7196 H   0  0  0  0  0  0  0  0  0  0  0  0
   -1.9442    0.1321    6.5865 H   0  0  0  0  0  0  0  0  0  0  0  0
   -2.3319    0.3361    4.8896 H   0  0  0  0  0  0  0  0  0  0  0  0
    0.1104   -1.3278    7.2814 H   0  0  0  0  0  0  0  0  0  0  0  0
   -0.3873   -2.6706    6.2363 H   0  0  0  0  0  0  0  0  0  0  0  0
   -0.4350   -1.1834    4.2612 H   0  0  0  0  0  0  0  0  0  0  0  0
    0.5560    1.0436    6.1130 H   0  0  0  0  0  0  0  0  0  0  0  0
    1.8483   -0.2255    3.6431 H   0  0  0  0  0  0  0  0  0  0  0  0
    2.9034   -0.0698    6.5281 H   0  0  0  0  0  0  0  0  0  0  0  0
    3.7352   -0.8498    5.1702 H   0  0  0  0  0  0  0  0  0  0  0  0
   -0.2323    1.0687    3.3998 H   0  0  0  0  0  0  0  0  0  0  0  0
    2.8348    2.0080    5.2802 H   0  0  0  0  0  0  0  0  0  0  0  0
    4.6656    0.9558    4.1362 H   0  0  0  0  0  0  0  0  0  0  0  0
    3.7419    1.0479    2.6451 H   0  0  0  0  0  0  0  0  0  0  0  0
    3.6243    3.1362    1.4868 H   0  0  0  0  0  0  0  0  0  0  0  0
    5.9334    6.4016    2.8523 H   0  0  0  0  0  0  0  0  0  0  0  0
    6.2895    5.2836    4.9130 H   0  0  0  0  0  0  0  0  0  0  0  0
    5.3767    3.0826    5.2967 H   0  0  0  0  0  0  0  0  0  0  0  0
    4.9170    7.4054   -0.5583 H   0  0  0  0  0  0  0  0  0  0  0  0
    4.7934    7.6687    1.1781 H   0  0  0  0  0  0  0  0  0  0  0  0
    6.2279    6.8842    0.4977 H   0  0  0  0  0  0  0  0  0  0  0  0
    2.6808    6.3039   -0.5009 H   0  0  0  0  0  0  0  0  0  0  0  0
    2.5262    6.3790    1.2595 H   0  0  0  0  0  0  0  0  0  0  0  0
    2.3759    4.8370    0.4136 H   0  0  0  0  0  0  0  0  0  0  0  0
    4.8629    5.1241   -1.5436 H   0  0  0  0  0  0  0  0  0  0  0  0
    4.4768    3.6959   -0.6020 H   0  0  0  0  0  0  0  0  0  0  0  0
    6.0629    4.4506   -0.4294 H   0  0  0  0  0  0  0  0  0  0  0  0
   -2.4141   -5.9924    7.2584 H   0  0  0  0  0  0  0  0  0  0  0  0
   -5.0431   -5.6728    4.7808 H   0  0  0  0  0  0  0  0  0  0  0  0
   -4.7613   -5.8406    6.4256 H   0  0  0  0  0  0  0  0  0  0  0  0
   -2.3672   -7.0301    9.3826 H   0  0  0  0  0  0  0  0  0  0  0  0
   -3.0520   -5.5419   10.1739 H   0  0  0  0  0  0  0  0  0  0  0  0
   -0.2667   -5.0292    7.7189 H   0  0  0  0  0  0  0  0  0  0  0  0
   -1.0270   -3.6242    8.5929 H   0  0  0  0  0  0  0  0  0  0  0  0
  1  2  2  0  0  0  0
  1 31  1  0  0  0  0
  2  3  1  0  0  0  0
  2 32  1  0  0  0  0
  3  4  2  0  0  0  0
  3 36  1  0  0  0  0
  4  5  1  0  0  0  0
  4  7  1  0  0  0  0
  5  6  2  0  0  0  0
  5 37  1  0  0  0  0
  6  1  1  0  0  0  0
  6 29  1  0  0  0  0
  7 38  1  0  0  0  0
  7 39  1  0  0  0  0
  8  9  1  0  0  0  0
  8 40  1  0  0  0  0
  8 41  1  0  0  0  0
  9 10  1  0  0  0  0
  9  7  1  0  0  0  0
  9 42  1  6  0  0  0
 10 11  1  0  0  0  0
 10 14  1  0  0  0  0
 10 43  1  1  0  0  0
 11 12  1  0  0  0  0
 11 15  1  0  0  0  0
 11 44  1  6  0  0  0
 12 13  1  0  0  0  0
 12 45  1  0  0  0  0
 12 46  1  0  0  0  0
 13  8  1  0  0  0  0
 13 27  2  0  0  0  0
 13 28  2  0  0  0  0
 14 47  1  0  0  0  0
 15 16  1  0  0  0  0
 15 48  1  0  0  0  0
 16 17  1  0  0  0  0
 16 49  1  0  0  0  0
 16 50  1  0  0  0  0
 17 18  2  0  0  0  0
 18 19  1  0  0  0  0
 18 51  1  0  0  0  0
 19 20  2  0  0  0  0
 19 23  1  0  0  0  0
 20 21  1  0  0  0  0
 20 52  1  0  0  0  0
 21 22  2  0  0  0  0
 21 53  1  0  0  0  0
 22 17  1  0  0  0  0
 22 54  1  0  0  0  0
 23 24  1  0  0  0  0
 23 25  1  0  0  0  0
 23 26  1  0  0  0  0
 24 55  1  0  0  0  0
 24 56  1  0  0  0  0
 24 57  1  0  0  0  0
 25 58  1  0  0  0  0
 25 59  1  0  0  0  0
 25 60  1  0  0  0  0
 26 61  1  0  0  0  0
 26 62  1  0  0  0  0
 26 63  1  0  0  0  0
 29 30  1  0  0  0  0
 30 33  1  0  0  0  0
 30 64  1  0  0  0  0
 31 65  1  0  0  0  0
 31 66  1  0  0  0  0
 33 34  1  0  0  0  0
 33 67  1  0  0  0  0
 33 68  1  0  0  0  0
 34 35  1  0  0  0  0
 35 30  1  0  0  0  0
 35 69  1  0  0  0  0
 35 70  1  0  0  0  0
M  END
$$$$
Dataset (56)
 OpenBabel02101614293D

 62 64  0  0  0  0  0  0  0  0999 V2000
   -4.0028   -3.9266    5.7718 C   0  0  0  0  0  0  0  0  0  0  0  0
   -4.0149   -3.2157    4.5533 C   0  0  0  0  0  0  0  0  0  0  0  0
   -3.3910   -1.9554    4.4627 C   0  0  0  0  0  0  0  0  0  0  0  0
   -2.7557   -1.3769    5.5858 C   0  0  0  0  0  0  0  0  0  0  0  0
   -2.7898   -2.0797    6.8127 C   0  0  0  0  0  0  0  0  0  0  0  0
   -3.3924   -3.3485    6.9046 C   0  0  0  0  0  0  0  0  0  0  0  0
   -2.0139   -0.0853    5.4658 C   0  0  0  0  0  0  0  0  0  0  0  0
    0.2690   -1.1699    5.9530 C   0  0  0  0  0  0  0  0  0  0  0  0
   -0.5359   -0.2614    4.9686 C   0  0  2  0  0  0  0  0  0  0  0  0
    0.1774    1.1246    4.7374 C   0  0  1  0  0  0  0  0  0  0  0  0
    1.6104    1.0351    4.1032 C   0  0  2  0  0  0  0  0  0  0  0  0
    2.6195    0.2669    5.0043 C   0  0  0  0  0  0  0  0  0  0  0  0
    1.9924   -1.3995    5.4007 S   0  0  0  0  0  0  0  0  0  0  0  0
   -0.6273    1.9505    3.8902 O   0  0  0  0  0  0  0  0  0  0  0  0
    2.1187    2.4113    3.8204 N   0  0  0  0  0  0  0  0  0  0  0  0
    3.2865    2.5069    2.9052 C   0  0  0  0  0  0  0  0  0  0  0  0
    3.6328    3.9228    2.6186 C   0  0  0  0  0  0  0  0  0  0  0  0
    3.2288    4.5446    1.4138 C   0  0  0  0  0  0  0  0  0  0  0  0
    3.5758    5.8851    1.0872 C   0  0  0  0  0  0  0  0  0  0  0  0
    4.3487    6.5913    2.0489 C   0  0  0  0  0  0  0  0  0  0  0  0
    4.7564    5.9926    3.2523 C   0  0  0  0  0  0  0  0  0  0  0  0
    4.4000    4.6670    3.5390 C   0  0  0  0  0  0  0  0  0  0  0  0
    3.1192    6.4922   -0.2319 C   0  0  0  0  0  0  0  0  0  0  0  0
    3.6184    7.9597   -0.4725 C   0  0  0  0  0  0  0  0  0  0  0  0
    1.5542    6.5368   -0.2634 C   0  0  0  0  0  0  0  0  0  0  0  0
    3.6584    5.6398   -1.4331 C   0  0  0  0  0  0  0  0  0  0  0  0
    2.8687   -2.0636    6.5668 O   0  0  0  0  0  0  0  0  0  0  0  0
    2.0326   -2.3184    4.0877 O   0  0  0  0  0  0  0  0  0  0  0  0
   -3.3585   -4.0059    8.0906 O   0  0  0  0  0  0  0  0  0  0  0  0
   -4.5588   -5.1545    5.8535 N   0  0  0  0  0  0  0  0  0  0  0  0
   -4.5912   -3.7138    3.4920 F   0  0  0  0  0  0  0  0  0  0  0  0
   -3.3918   -1.4595    3.5653 H   0  0  0  0  0  0  0  0  0  0  0  0
   -2.3415   -1.6810    7.6421 H   0  0  0  0  0  0  0  0  0  0  0  0
   -2.0077    0.4381    6.4273 H   0  0  0  0  0  0  0  0  0  0  0  0
   -2.5596    0.5600    4.7722 H   0  0  0  0  0  0  0  0  0  0  0  0
    0.2858   -0.7222    6.9498 H   0  0  0  0  0  0  0  0  0  0  0  0
   -0.1652   -2.1673    6.0243 H   0  0  0  0  0  0  0  0  0  0  0  0
   -0.5739   -0.7741    4.0020 H   0  0  0  0  0  0  0  0  0  0  0  0
    0.2506    1.6447    5.6969 H   0  0  0  0  0  0  0  0  0  0  0  0
    1.5117    0.4984    3.1529 H   0  0  0  0  0  0  0  0  0  0  0  0
    2.7801    0.8144    5.9347 H   0  0  0  0  0  0  0  0  0  0  0  0
    3.5776    0.1385    4.5017 H   0  0  0  0  0  0  0  0  0  0  0  0
   -0.6898    1.4700    3.0380 H   0  0  0  0  0  0  0  0  0  0  0  0
    2.3810    2.8342    4.7139 H   0  0  0  0  0  0  0  0  0  0  0  0
    4.1637    2.0252    3.3431 H   0  0  0  0  0  0  0  0  0  0  0  0
    3.0581    1.9766    1.9760 H   0  0  0  0  0  0  0  0  0  0  0  0
    2.6678    3.9965    0.7572 H   0  0  0  0  0  0  0  0  0  0  0  0
    4.6337    7.5594    1.8984 H   0  0  0  0  0  0  0  0  0  0  0  0
    5.3203    6.5233    3.9214 H   0  0  0  0  0  0  0  0  0  0  0  0
    4.7164    4.2464    4.4167 H   0  0  0  0  0  0  0  0  0  0  0  0
    3.2688    8.3483   -1.4317 H   0  0  0  0  0  0  0  0  0  0  0  0
    3.2473    8.6297    0.3058 H   0  0  0  0  0  0  0  0  0  0  0  0
    4.7099    8.0013   -0.4788 H   0  0  0  0  0  0  0  0  0  0  0  0
    1.1922    7.0050   -1.1817 H   0  0  0  0  0  0  0  0  0  0  0  0
    1.1736    7.1132    0.5830 H   0  0  0  0  0  0  0  0  0  0  0  0
    1.1172    5.5382   -0.2139 H   0  0  0  0  0  0  0  0  0  0  0  0
    3.3854    6.0903   -2.3910 H   0  0  0  0  0  0  0  0  0  0  0  0
    3.2547    4.6262   -1.4300 H   0  0  0  0  0  0  0  0  0  0  0  0
    4.7480    5.5694   -1.3928 H   0  0  0  0  0  0  0  0  0  0  0  0
   -2.4820   -4.4459    8.1004 H   0  0  0  0  0  0  0  0  0  0  0  0
   -4.9781   -5.5542    5.0772 H   0  0  0  0  0  0  0  0  0  0  0  0
   -4.5361   -5.6477    6.6871 H   0  0  0  0  0  0  0  0  0  0  0  0
  1  2  2  0  0  0  0
  1 30  1  0  0  0  0
  2  3  1  0  0  0  0
  2 31  1  0  0  0  0
  3  4  2  0  0  0  0
  3 32  1  0  0  0  0
  4  5  1  0  0  0  0
  4  7  1  0  0  0  0
  5  6  2  0  0  0  0
  5 33  1  0  0  0  0
  6  1  1  0  0  0  0
  6 29  1  0  0  0  0
  7 34  1  0  0  0  0
  7 35  1  0  0  0  0
  8  9  1  0  0  0  0
  8 36  1  0  0  0  0
  8 37  1  0  0  0  0
  9 10  1  0  0  0  0
  9  7  1  0  0  0  0
  9 38  1  6  0  0  0
 10 11  1  0  0  0  0
 10 14  1  0  0  0  0
 10 39  1  1  0  0  0
 11 12  1  0  0  0  0
 11 15  1  0  0  0  0
 11 40  1  6  0  0  0
 12 13  1  0  0  0  0
 12 41  1  0  0  0  0
 12 42  1  0  0  0  0
 13  8  1  0  0  0  0
 13 27  2  0  0  0  0
 13 28  2  0  0  0  0
 14 43  1  0  0  0  0
 15 16  1  0  0  0  0
 15 44  1  0  0  0  0
 16 17  1  0  0  0  0
 16 45  1  0  0  0  0
 16 46  1  0  0  0  0
 17 18  2  0  0  0  0
 18 19  1  0  0  0  0
 18 47  1  0  0  0  0
 19 20  2  0  0  0  0
 19 23  1  0  0  0  0
 20 21  1  0  0  0  0
 20 48  1  0  0  0  0
 21 22  2  0  0  0  0
 21 49  1  0  0  0  0
 22 17  1  0  0  0  0
 22 50  1  0  0  0  0
 23 24  1  0  0  0  0
 23 25  1  0  0  0  0
 23 26  1  0  0  0  0
 24 51  1  0  0  0  0
 24 52  1  0  0  0  0
 24 53  1  0  0  0  0
 25 54  1  0  0  0  0
 25 55  1  0  0  0  0
 25 56  1  0  0  0  0
 26 57  1  0  0  0  0
 26 58  1  0  0  0  0
 26 59  1  0  0  0  0
 29 60  1  0  0  0  0
 30 61  1  0  0  0  0
 30 62  1  0  0  0  0
M  END
$$$$
Dataset (57)
 OpenBabel02101614293D

 68 70  0  0  0  0  0  0  0  0999 V2000
   -3.4103   -2.3920    4.8333 C   0  0  0  0  0  0  0  0  0  0  0  0
   -2.8960   -1.2628    5.5056 C   0  0  0  0  0  0  0  0  0  0  0  0
   -3.2474    0.0326    5.0793 C   0  0  0  0  0  0  0  0  0  0  0  0
   -4.0954    0.2337    3.9638 C   0  0  0  0  0  0  0  0  0  0  0  0
   -4.6372   -0.9071    3.3268 C   0  0  0  0  0  0  0  0  0  0  0  0
   -4.2986   -2.2123    3.7479 C   0  0  0  0  0  0  0  0  0  0  0  0
   -4.3717    1.6090    3.4432 C   0  0  0  0  0  0  0  0  0  0  0  0
   -1.9553    1.9643    2.6637 C   0  0  0  0  0  0  0  0  0  0  0  0
   -3.4555    2.0118    2.2326 C   0  0  2  0  0  0  0  0  0  0  0  0
   -3.8434    3.4134    1.6222 C   0  0  1  0  0  0  0  0  0  0  0  0
   -3.0574    3.8223    0.3247 C   0  0  2  0  0  0  0  0  0  0  0  0
   -1.5307    3.9662    0.5789 C   0  0  0  0  0  0  0  0  0  0  0  0
   -0.8487    2.4292    1.2893 S   0  0  0  0  0  0  0  0  0  0  0  0
   -5.2407    3.4347    1.3193 O   0  0  0  0  0  0  0  0  0  0  0  0
   -3.6076    5.1003   -0.2208 N   0  0  0  0  0  0  0  0  0  0  0  0
   -3.2351    5.4573   -1.6143 C   0  0  0  0  0  0  0  0  0  0  0  0
   -3.9363    6.6895   -2.0593 C   0  0  0  0  0  0  0  0  0  0  0  0
   -5.0898    6.6195   -2.8751 C   0  0  0  0  0  0  0  0  0  0  0  0
   -5.7627    7.7777   -3.3590 C   0  0  0  0  0  0  0  0  0  0  0  0
   -5.2235    9.0328   -2.9630 C   0  0  0  0  0  0  0  0  0  0  0  0
   -4.0875    9.1262   -2.1431 C   0  0  0  0  0  0  0  0  0  0  0  0
   -3.4481    7.9622   -1.6945 C   0  0  0  0  0  0  0  0  0  0  0  0
   -6.9894    7.6306   -4.2492 C   0  0  0  0  0  0  0  0  0  0  0  0
   -7.5960    8.9897   -4.7502 C   0  0  0  0  0  0  0  0  0  0  0  0
   -8.1182    6.8987   -3.4473 C   0  0  0  0  0  0  0  0  0  0  0  0
   -6.6157    6.8105   -5.5323 C   0  0  0  0  0  0  0  0  0  0  0  0
    0.6386    2.6718    1.8353 O   0  0  0  0  0  0  0  0  0  0  0  0
   -0.8495    1.2729    0.1786 O   0  0  0  0  0  0  0  0  0  0  0  0
   -4.8405   -3.2938    3.0975 O   0  0  0  0  0  0  0  0  0  0  0  0
   -3.0508   -3.6373    5.2209 N   0  0  0  0  0  0  0  0  0  0  0  0
   -2.0756   -1.3960    6.5165 F   0  0  0  0  0  0  0  0  0  0  0  0
   -4.0807   -3.6978    1.9390 C   0  0  0  0  0  0  0  0  0  0  0  0
   -4.7468   -4.9334    1.3000 C   0  0  0  0  0  0  0  0  0  0  0  0
   -4.0395   -5.3531    0.1986 F   0  0  0  0  0  0  0  0  0  0  0  0
   -2.8468    0.8345    5.5720 H   0  0  0  0  0  0  0  0  0  0  0  0
   -5.2768   -0.7952    2.5364 H   0  0  0  0  0  0  0  0  0  0  0  0
   -5.4248    1.6585    3.1492 H   0  0  0  0  0  0  0  0  0  0  0  0
   -4.2449    2.3453    4.2439 H   0  0  0  0  0  0  0  0  0  0  0  0
   -1.7804    2.6534    3.4931 H   0  0  0  0  0  0  0  0  0  0  0  0
   -1.6649    0.9599    2.9783 H   0  0  0  0  0  0  0  0  0  0  0  0
   -3.6036    1.2605    1.4482 H   0  0  0  0  0  0  0  0  0  0  0  0
   -3.6845    4.1820    2.3846 H   0  0  0  0  0  0  0  0  0  0  0  0
   -3.2144    3.0311   -0.4157 H   0  0  0  0  0  0  0  0  0  0  0  0
   -1.3455    4.7875    1.2742 H   0  0  0  0  0  0  0  0  0  0  0  0
   -0.9919    4.1627   -0.3478 H   0  0  0  0  0  0  0  0  0  0  0  0
   -5.3738    2.7340    0.6473 H   0  0  0  0  0  0  0  0  0  0  0  0
   -3.3049    5.8600    0.3929 H   0  0  0  0  0  0  0  0  0  0  0  0
   -2.1602    5.6224   -1.6919 H   0  0  0  0  0  0  0  0  0  0  0  0
   -3.4772    4.6240   -2.2786 H   0  0  0  0  0  0  0  0  0  0  0  0
   -5.4400    5.6925   -3.1213 H   0  0  0  0  0  0  0  0  0  0  0  0
   -5.6425    9.9134   -3.2622 H   0  0  0  0  0  0  0  0  0  0  0  0
   -3.7211   10.0442   -1.8759 H   0  0  0  0  0  0  0  0  0  0  0  0
   -2.6164    8.0527   -1.1071 H   0  0  0  0  0  0  0  0  0  0  0  0
   -8.4710    8.8252   -5.3864 H   0  0  0  0  0  0  0  0  0  0  0  0
   -7.9160    9.6059   -3.9060 H   0  0  0  0  0  0  0  0  0  0  0  0
   -6.8609    9.5483   -5.3363 H   0  0  0  0  0  0  0  0  0  0  0  0
   -9.0316    6.8146   -4.0408 H   0  0  0  0  0  0  0  0  0  0  0  0
   -8.3560    7.4540   -2.5352 H   0  0  0  0  0  0  0  0  0  0  0  0
   -7.8214    5.8872   -3.1601 H   0  0  0  0  0  0  0  0  0  0  0  0
   -7.4641    6.7360   -6.2164 H   0  0  0  0  0  0  0  0  0  0  0  0
   -6.3096    5.7912   -5.2894 H   0  0  0  0  0  0  0  0  0  0  0  0
   -5.7918    7.2932   -6.0655 H   0  0  0  0  0  0  0  0  0  0  0  0
   -3.4201   -4.4131    4.7688 H   0  0  0  0  0  0  0  0  0  0  0  0
   -2.4085   -3.7617    5.9404 H   0  0  0  0  0  0  0  0  0  0  0  0
   -4.0497   -2.8900    1.1988 H   0  0  0  0  0  0  0  0  0  0  0  0
   -3.0558   -3.9607    2.2224 H   0  0  0  0  0  0  0  0  0  0  0  0
   -5.7647   -4.6900    0.9873 H   0  0  0  0  0  0  0  0  0  0  0  0
   -4.7816   -5.7520    2.0222 H   0  0  0  0  0  0  0  0  0  0  0  0
  1  2  2  0  0  0  0
  1 30  1  0  0  0  0
  2  3  1  0  0  0  0
  2 31  1  0  0  0  0
  3  4  2  0  0  0  0
  3 35  1  0  0  0  0
  4  5  1  0  0  0  0
  4  7  1  0  0  0  0
  5  6  2  0  0  0  0
  5 36  1  0  0  0  0
  6  1  1  0  0  0  0
  6 29  1  0  0  0  0
  7 37  1  0  0  0  0
  7 38  1  0  0  0  0
  8  9  1  0  0  0  0
  8 39  1  0  0  0  0
  8 40  1  0  0  0  0
  9 10  1  0  0  0  0
  9  7  1  0  0  0  0
  9 41  1  6  0  0  0
 10 11  1  0  0  0  0
 10 14  1  0  0  0  0
 10 42  1  1  0  0  0
 11 12  1  0  0  0  0
 11 15  1  0  0  0  0
 11 43  1  6  0  0  0
 12 13  1  0  0  0  0
 12 44  1  0  0  0  0
 12 45  1  0  0  0  0
 13  8  1  0  0  0  0
 13 27  2  0  0  0  0
 13 28  2  0  0  0  0
 14 46  1  0  0  0  0
 15 16  1  0  0  0  0
 15 47  1  0  0  0  0
 16 17  1  0  0  0  0
 16 48  1  0  0  0  0
 16 49  1  0  0  0  0
 17 18  2  0  0  0  0
 18 19  1  0  0  0  0
 18 50  1  0  0  0  0
 19 20  2  0  0  0  0
 19 23  1  0  0  0  0
 20 21  1  0  0  0  0
 20 51  1  0  0  0  0
 21 22  2  0  0  0  0
 21 52  1  0  0  0  0
 22 17  1  0  0  0  0
 22 53  1  0  0  0  0
 23 24  1  0  0  0  0
 23 25  1  0  0  0  0
 23 26  1  0  0  0  0
 24 54  1  0  0  0  0
 24 55  1  0  0  0  0
 24 56  1  0  0  0  0
 25 57  1  0  0  0  0
 25 58  1  0  0  0  0
 25 59  1  0  0  0  0
 26 60  1  0  0  0  0
 26 61  1  0  0  0  0
 26 62  1  0  0  0  0
 29 32  1  0  0  0  0
 30 63  1  0  0  0  0
 30 64  1  0  0  0  0
 32 33  1  0  0  0  0
 32 65  1  0  0  0  0
 32 66  1  0  0  0  0
 33 34  1  0  0  0  0
 33 67  1  0  0  0  0
 33 68  1  0  0  0  0
M  END
$$$$
Dataset (58)
 OpenBabel02101614293D

 68 70  0  0  0  0  0  0  0  0999 V2000
   -1.9089   -5.3380    8.2084 C   0  0  0  0  0  0  0  0  0  0  0  0
   -2.5235   -4.4475    7.3011 C   0  0  0  0  0  0  0  0  0  0  0  0
   -1.8566   -4.0778    6.1178 C   0  0  0  0  0  0  0  0  0  0  0  0
   -0.5590   -4.5659    5.8314 C   0  0  0  0  0  0  0  0  0  0  0  0
    0.0329   -5.4811    6.7329 C   0  0  0  0  0  0  0  0  0  0  0  0
   -0.6245   -5.8555    7.9241 C   0  0  0  0  0  0  0  0  0  0  0  0
    0.1923   -4.0770    4.6330 C   0  0  0  0  0  0  0  0  0  0  0  0
    0.3844   -1.6922    5.5319 C   0  0  0  0  0  0  0  0  0  0  0  0
    1.1820   -2.8982    4.9481 C   0  0  2  0  0  0  0  0  0  0  0  0
    2.0497   -2.4688    3.7034 C   0  0  1  0  0  0  0  0  0  0  0  0
    3.1567   -1.3931    4.0008 C   0  0  2  0  0  0  0  0  0  0  0  0
    2.5438   -0.0380    4.4601 C   0  0  0  0  0  0  0  0  0  0  0  0
    1.4806   -0.2905    5.9228 S   0  0  0  0  0  0  0  0  0  0  0  0
    2.6844   -3.6209    3.1416 O   0  0  0  0  0  0  0  0  0  0  0  0
    4.0048   -1.1915    2.7877 N   0  0  0  0  0  0  0  0  0  0  0  0
    5.2753   -0.4401    2.9668 C   0  0  0  0  0  0  0  0  0  0  0  0
    6.0339   -0.3891    1.6900 C   0  0  0  0  0  0  0  0  0  0  0  0
    7.0926   -1.2927    1.4404 C   0  0  0  0  0  0  0  0  0  0  0  0
    7.8851   -1.2445    0.2603 C   0  0  0  0  0  0  0  0  0  0  0  0
    7.5452   -0.2432   -0.6897 C   0  0  0  0  0  0  0  0  0  0  0  0
    6.4765    0.6460   -0.4771 C   0  0  0  0  0  0  0  0  0  0  0  0
    5.7244    0.5743    0.7061 C   0  0  0  0  0  0  0  0  0  0  0  0
    9.0258   -2.2379    0.0709 C   0  0  0  0  0  0  0  0  0  0  0  0
    9.8449   -2.0425   -1.2558 C   0  0  0  0  0  0  0  0  0  0  0  0
    8.4400   -3.6931    0.0373 C   0  0  0  0  0  0  0  0  0  0  0  0
   10.0401   -2.0854    1.2589 C   0  0  0  0  0  0  0  0  0  0  0  0
    0.6084    1.0222    6.2132 O   0  0  0  0  0  0  0  0  0  0  0  0
    2.3801   -0.6617    7.1973 O   0  0  0  0  0  0  0  0  0  0  0  0
   -0.0109   -6.7309    8.7842 O   0  0  0  0  0  0  0  0  0  0  0  0
   -2.5452   -5.6882    9.3485 N   0  0  0  0  0  0  0  0  0  0  0  0
   -3.7074   -3.9470    7.5443 F   0  0  0  0  0  0  0  0  0  0  0  0
    0.8480   -6.0796    9.7426 C   0  0  0  0  0  0  0  0  0  0  0  0
    1.4655   -7.1292   10.6889 C   0  0  0  0  0  0  0  0  0  0  0  0
    2.2926   -6.5204   11.6013 F   0  0  0  0  0  0  0  0  0  0  0  0
    0.4899   -7.8099   11.3751 F   0  0  0  0  0  0  0  0  0  0  0  0
   -2.3115   -3.4286    5.4687 H   0  0  0  0  0  0  0  0  0  0  0  0
    0.9594   -5.8694    6.5350 H   0  0  0  0  0  0  0  0  0  0  0  0
    0.7391   -4.9217    4.2063 H   0  0  0  0  0  0  0  0  0  0  0  0
   -0.5088   -3.7483    3.8595 H   0  0  0  0  0  0  0  0  0  0  0  0
   -0.3688   -1.3541    4.8180 H   0  0  0  0  0  0  0  0  0  0  0  0
   -0.1105   -1.9607    6.4639 H   0  0  0  0  0  0  0  0  0  0  0  0
    1.8762   -3.2511    5.7183 H   0  0  0  0  0  0  0  0  0  0  0  0
    1.3832   -2.0695    2.9339 H   0  0  0  0  0  0  0  0  0  0  0  0
    3.7926   -1.7839    4.8025 H   0  0  0  0  0  0  0  0  0  0  0  0
    1.9496    0.3966    3.6520 H   0  0  0  0  0  0  0  0  0  0  0  0
    3.3155    0.6772    4.7459 H   0  0  0  0  0  0  0  0  0  0  0  0
    3.2536   -3.9781    3.8549 H   0  0  0  0  0  0  0  0  0  0  0  0
    3.4436   -0.6913    2.0951 H   0  0  0  0  0  0  0  0  0  0  0  0
    5.0860    0.5841    3.2984 H   0  0  0  0  0  0  0  0  0  0  0  0
    5.8759   -0.9214    3.7449 H   0  0  0  0  0  0  0  0  0  0  0  0
    7.2862   -2.0027    2.1491 H   0  0  0  0  0  0  0  0  0  0  0  0
    8.0622   -0.1426   -1.5627 H   0  0  0  0  0  0  0  0  0  0  0  0
    6.2489    1.3470   -1.1869 H   0  0  0  0  0  0  0  0  0  0  0  0
    4.9549    1.2359    0.8503 H   0  0  0  0  0  0  0  0  0  0  0  0
   10.6527   -2.7738   -1.3416 H   0  0  0  0  0  0  0  0  0  0  0  0
    9.2056   -2.1586   -2.1345 H   0  0  0  0  0  0  0  0  0  0  0  0
   10.2974   -1.0484   -1.2918 H   0  0  0  0  0  0  0  0  0  0  0  0
    9.2181   -4.4402   -0.1403 H   0  0  0  0  0  0  0  0  0  0  0  0
    7.6941   -3.7887   -0.7561 H   0  0  0  0  0  0  0  0  0  0  0  0
    7.9584   -3.9535    0.9796 H   0  0  0  0  0  0  0  0  0  0  0  0
   10.9057   -2.7422    1.1414 H   0  0  0  0  0  0  0  0  0  0  0  0
    9.5816   -2.3362    2.2157 H   0  0  0  0  0  0  0  0  0  0  0  0
   10.4010   -1.0552    1.3223 H   0  0  0  0  0  0  0  0  0  0  0  0
   -2.1408   -6.3212    9.9625 H   0  0  0  0  0  0  0  0  0  0  0  0
   -3.4079   -5.3011    9.5637 H   0  0  0  0  0  0  0  0  0  0  0  0
    1.6615   -5.5588    9.2302 H   0  0  0  0  0  0  0  0  0  0  0  0
    0.2874   -5.3537   10.3396 H   0  0  0  0  0  0  0  0  0  0  0  0
    2.0530   -7.8479   10.1156 H   0  0  0  0  0  0  0  0  0  0  0  0
  1  2  2  0  0  0  0
  1 30  1  0  0  0  0
  2  3  1  0  0  0  0
  2 31  1  0  0  0  0
  3  4  2  0  0  0  0
  3 36  1  0  0  0  0
  4  5  1  0  0  0  0
  4  7  1  0  0  0  0
  5  6  2  0  0  0  0
  5 37  1  0  0  0  0
  6  1  1  0  0  0  0
  6 29  1  0  0  0  0
  7 38  1  0  0  0  0
  7 39  1  0  0  0  0
  8  9  1  0  0  0  0
  8 40  1  0  0  0  0
  8 41  1  0  0  0  0
  9 10  1  0  0  0  0
  9  7  1  0  0  0  0
  9 42  1  1  0  0  0
 10 11  1  0  0  0  0
 10 14  1  0  0  0  0
 10 43  1  6  0  0  0
 11 12  1  0  0  0  0
 11 15  1  0  0  0  0
 11 44  1  1  0  0  0
 12 13  1  0  0  0  0
 12 45  1  0  0  0  0
 12 46  1  0  0  0  0
 13  8  1  0  0  0  0
 13 27  2  0  0  0  0
 13 28  2  0  0  0  0
 14 47  1  0  0  0  0
 15 16  1  0  0  0  0
 15 48  1  0  0  0  0
 16 17  1  0  0  0  0
 16 49  1  0  0  0  0
 16 50  1  0  0  0  0
 17 18  2  0  0  0  0
 18 19  1  0  0  0  0
 18 51  1  0  0  0  0
 19 20  2  0  0  0  0
 19 23  1  0  0  0  0
 20 21  1  0  0  0  0
 20 52  1  0  0  0  0
 21 22  2  0  0  0  0
 21 53  1  0  0  0  0
 22 17  1  0  0  0  0
 22 54  1  0  0  0  0
 23 24  1  0  0  0  0
 23 25  1  0  0  0  0
 23 26  1  0  0  0  0
 24 55  1  0  0  0  0
 24 56  1  0  0  0  0
 24 57  1  0  0  0  0
 25 58  1  0  0  0  0
 25 59  1  0  0  0  0
 25 60  1  0  0  0  0
 26 61  1  0  0  0  0
 26 62  1  0  0  0  0
 26 63  1  0  0  0  0
 29 32  1  0  0  0  0
 30 64  1  0  0  0  0
 30 65  1  0  0  0  0
 32 33  1  0  0  0  0
 32 66  1  0  0  0  0
 32 67  1  0  0  0  0
 33 34  1  0  0  0  0
 33 35  1  0  0  0  0
 33 68  1  0  0  0  0
M  END
$$$$
Dataset (59)
 OpenBabel02101614293D

 68 70  0  0  0  0  0  0  0  0999 V2000
   -1.9166   -5.3517    8.2012 C   0  0  0  0  0  0  0  0  0  0  0  0
   -2.5382   -4.4789    7.2832 C   0  0  0  0  0  0  0  0  0  0  0  0
   -1.8660   -4.0991    6.1062 C   0  0  0  0  0  0  0  0  0  0  0  0
   -0.5578   -4.5623    5.8261 C   0  0  0  0  0  0  0  0  0  0  0  0
    0.0377   -5.4666    6.7367 C   0  0  0  0  0  0  0  0  0  0  0  0
   -0.6274   -5.8600    7.9186 C   0  0  0  0  0  0  0  0  0  0  0  0
    0.1939   -4.0687    4.6311 C   0  0  0  0  0  0  0  0  0  0  0  0
    0.3780   -1.6785    5.5447 C   0  0  0  0  0  0  0  0  0  0  0  0
    1.1757   -2.8872    4.9598 C   0  0  2  0  0  0  0  0  0  0  0  0
    2.0458   -2.4638    3.7138 C   0  0  1  0  0  0  0  0  0  0  0  0
    3.1454   -1.3791    4.0018 C   0  0  2  0  0  0  0  0  0  0  0  0
    2.5347   -0.0287    4.4727 C   0  0  0  0  0  0  0  0  0  0  0  0
    1.4769   -0.2776    5.9393 S   0  0  0  0  0  0  0  0  0  0  0  0
    2.6927   -3.6147    3.1651 O   0  0  0  0  0  0  0  0  0  0  0  0
    3.9785   -1.1671    2.7791 N   0  0  0  0  0  0  0  0  0  0  0  0
    5.2659   -0.4469    2.9587 C   0  0  0  0  0  0  0  0  0  0  0  0
    6.0339   -0.3995    1.6873 C   0  0  0  0  0  0  0  0  0  0  0  0
    7.0984   -1.2982    1.4454 C   0  0  0  0  0  0  0  0  0  0  0  0
    7.8869   -1.2528    0.2605 C   0  0  0  0  0  0  0  0  0  0  0  0
    7.5395   -0.2580   -0.6950 C   0  0  0  0  0  0  0  0  0  0  0  0
    6.4783    0.6357   -0.4808 C   0  0  0  0  0  0  0  0  0  0  0  0
    5.7300    0.5656    0.7026 C   0  0  0  0  0  0  0  0  0  0  0  0
    9.0304   -2.2399    0.0706 C   0  0  0  0  0  0  0  0  0  0  0  0
    9.8461   -2.0430   -1.2576 C   0  0  0  0  0  0  0  0  0  0  0  0
    8.4510   -3.6951    0.0345 C   0  0  0  0  0  0  0  0  0  0  0  0
   10.0565   -2.0945    1.2478 C   0  0  0  0  0  0  0  0  0  0  0  0
    0.6123    1.0386    6.2386 O   0  0  0  0  0  0  0  0  0  0  0  0
    2.3883   -0.6428    7.2066 O   0  0  0  0  0  0  0  0  0  0  0  0
   -0.0148   -6.7353    8.7804 O   0  0  0  0  0  0  0  0  0  0  0  0
   -2.5454   -5.6869    9.3520 N   0  0  0  0  0  0  0  0  0  0  0  0
   -3.7294   -3.9909    7.5177 F   0  0  0  0  0  0  0  0  0  0  0  0
    0.8496   -6.0846    9.7360 C   0  0  0  0  0  0  0  0  0  0  0  0
    1.4705   -7.1344   10.6837 C   0  0  0  0  0  0  0  0  0  0  0  0
    2.2868   -6.5235   11.6044 F   0  0  0  0  0  0  0  0  0  0  0  0
    0.4886   -7.8117   11.3662 F   0  0  0  0  0  0  0  0  0  0  0  0
    2.2251   -8.0412    9.9790 F   0  0  0  0  0  0  0  0  0  0  0  0
   -2.3324   -3.4555    5.4629 H   0  0  0  0  0  0  0  0  0  0  0  0
    0.9707   -5.8408    6.5484 H   0  0  0  0  0  0  0  0  0  0  0  0
    0.7480   -4.9091    4.2024 H   0  0  0  0  0  0  0  0  0  0  0  0
   -0.5062   -3.7423    3.8557 H   0  0  0  0  0  0  0  0  0  0  0  0
   -0.3679   -1.3365    4.8244 H   0  0  0  0  0  0  0  0  0  0  0  0
   -0.1281   -1.9468    6.4721 H   0  0  0  0  0  0  0  0  0  0  0  0
    1.8641   -3.2421    5.7350 H   0  0  0  0  0  0  0  0  0  0  0  0
    1.3785   -2.0876    2.9333 H   0  0  0  0  0  0  0  0  0  0  0  0
    3.7890   -1.7686    4.7974 H   0  0  0  0  0  0  0  0  0  0  0  0
    1.9310    0.4054    3.6726 H   0  0  0  0  0  0  0  0  0  0  0  0
    3.3133    0.6808    4.7538 H   0  0  0  0  0  0  0  0  0  0  0  0
    3.2748   -3.9502    3.8782 H   0  0  0  0  0  0  0  0  0  0  0  0
    3.4164   -0.6458    2.1022 H   0  0  0  0  0  0  0  0  0  0  0  0
    5.0903    0.5776    3.2924 H   0  0  0  0  0  0  0  0  0  0  0  0
    5.8522   -0.9413    3.7385 H   0  0  0  0  0  0  0  0  0  0  0  0
    7.2992   -1.9994    2.1626 H   0  0  0  0  0  0  0  0  0  0  0  0
    8.0482   -0.1563   -1.5725 H   0  0  0  0  0  0  0  0  0  0  0  0
    6.2543    1.3419   -1.1870 H   0  0  0  0  0  0  0  0  0  0  0  0
    4.9689    1.2341    0.8422 H   0  0  0  0  0  0  0  0  0  0  0  0
   10.6564   -2.7738   -1.3430 H   0  0  0  0  0  0  0  0  0  0  0  0
    9.2021   -2.1677   -2.1315 H   0  0  0  0  0  0  0  0  0  0  0  0
   10.2964   -1.0475   -1.2915 H   0  0  0  0  0  0  0  0  0  0  0  0
    9.2412   -4.4280   -0.1449 H   0  0  0  0  0  0  0  0  0  0  0  0
    7.7124   -3.7896   -0.7662 H   0  0  0  0  0  0  0  0  0  0  0  0
    7.9656   -3.9632    0.9751 H   0  0  0  0  0  0  0  0  0  0  0  0
   10.9160   -2.7542    1.1068 H   0  0  0  0  0  0  0  0  0  0  0  0
    9.6117   -2.3496    2.2111 H   0  0  0  0  0  0  0  0  0  0  0  0
   10.4244   -1.0666    1.3071 H   0  0  0  0  0  0  0  0  0  0  0  0
   -2.1262   -6.3021    9.9750 H   0  0  0  0  0  0  0  0  0  0  0  0
   -3.4148   -5.3089    9.5667 H   0  0  0  0  0  0  0  0  0  0  0  0
    1.6562   -5.5534    9.2204 H   0  0  0  0  0  0  0  0  0  0  0  0
    0.2840   -5.3640   10.3355 H   0  0  0  0  0  0  0  0  0  0  0  0
  1  2  2  0  0  0  0
  1 30  1  0  0  0  0
  2  3  1  0  0  0  0
  2 31  1  0  0  0  0
  3  4  2  0  0  0  0
  3 37  1  0  0  0  0
  4  5  1  0  0  0  0
  4  7  1  0  0  0  0
  5  6  2  0  0  0  0
  5 38  1  0  0  0  0
  6  1  1  0  0  0  0
  6 29  1  0  0  0  0
  7 39  1  0  0  0  0
  7 40  1  0  0  0  0
  8  9  1  0  0  0  0
  8 41  1  0  0  0  0
  8 42  1  0  0  0  0
  9 10  1  0  0  0  0
  9  7  1  0  0  0  0
  9 43  1  1  0  0  0
 10 11  1  0  0  0  0
 10 14  1  0  0  0  0
 10 44  1  6  0  0  0
 11 12  1  0  0  0  0
 11 15  1  0  0  0  0
 11 45  1  1  0  0  0
 12 13  1  0  0  0  0
 12 46  1  0  0  0  0
 12 47  1  0  0  0  0
 13  8  1  0  0  0  0
 13 27  2  0  0  0  0
 13 28  2  0  0  0  0
 14 48  1  0  0  0  0
 15 16  1  0  0  0  0
 15 49  1  0  0  0  0
 16 17  1  0  0  0  0
 16 50  1  0  0  0  0
 16 51  1  0  0  0  0
 17 18  2  0  0  0  0
 18 19  1  0  0  0  0
 18 52  1  0  0  0  0
 19 20  2  0  0  0  0
 19 23  1  0  0  0  0
 20 21  1  0  0  0  0
 20 53  1  0  0  0  0
 21 22  2  0  0  0  0
 21 54  1  0  0  0  0
 22 17  1  0  0  0  0
 22 55  1  0  0  0  0
 23 24  1  0  0  0  0
 23 25  1  0  0  0  0
 23 26  1  0  0  0  0
 24 56  1  0  0  0  0
 24 57  1  0  0  0  0
 24 58  1  0  0  0  0
 25 59  1  0  0  0  0
 25 60  1  0  0  0  0
 25 61  1  0  0  0  0
 26 62  1  0  0  0  0
 26 63  1  0  0  0  0
 26 64  1  0  0  0  0
 29 32  1  0  0  0  0
 30 65  1  0  0  0  0
 30 66  1  0  0  0  0
 32 33  1  0  0  0  0
 32 67  1  0  0  0  0
 32 68  1  0  0  0  0
 33 34  1  0  0  0  0
 33 35  1  0  0  0  0
 33 36  1  0  0  0  0
M  END
$$$$
Dataset (60)
 OpenBabel02101614293D

 71 73  0  0  0  0  0  0  0  0999 V2000
   -1.9707   -5.3440    8.2056 C   0  0  0  0  0  0  0  0  0  0  0  0
   -2.5633   -4.4523    7.2377 C   0  0  0  0  0  0  0  0  0  0  0  0
   -1.8784   -4.0798    6.0684 C   0  0  0  0  0  0  0  0  0  0  0  0
   -0.5772   -4.5626    5.8056 C   0  0  0  0  0  0  0  0  0  0  0  0
   -0.0068   -5.4716    6.7237 C   0  0  0  0  0  0  0  0  0  0  0  0
   -0.6749   -5.8385    7.9129 C   0  0  0  0  0  0  0  0  0  0  0  0
    0.1955   -4.0736    4.6205 C   0  0  0  0  0  0  0  0  0  0  0  0
    0.3778   -1.6894    5.5440 C   0  0  0  0  0  0  0  0  0  0  0  0
    1.1788   -2.8941    4.9561 C   0  0  2  0  0  0  0  0  0  0  0  0
    2.0525   -2.4646    3.7144 C   0  0  1  0  0  0  0  0  0  0  0  0
    3.1519   -1.3805    4.0038 C   0  0  2  0  0  0  0  0  0  0  0  0
    2.5367   -0.0324    4.4709 C   0  0  0  0  0  0  0  0  0  0  0  0
    1.4766   -0.2861    5.9347 S   0  0  0  0  0  0  0  0  0  0  0  0
    2.6983   -3.6154    3.1645 O   0  0  0  0  0  0  0  0  0  0  0  0
    3.9856   -1.1624    2.7833 N   0  0  0  0  0  0  0  0  0  0  0  0
    5.2722   -0.4400    2.9585 C   0  0  0  0  0  0  0  0  0  0  0  0
    6.0412   -0.3920    1.6865 C   0  0  0  0  0  0  0  0  0  0  0  0
    7.1036   -1.2926    1.4440 C   0  0  0  0  0  0  0  0  0  0  0  0
    7.8925   -1.2538    0.2592 C   0  0  0  0  0  0  0  0  0  0  0  0
    7.5458   -0.2615   -0.6983 C   0  0  0  0  0  0  0  0  0  0  0  0
    6.4870    0.6350   -0.4863 C   0  0  0  0  0  0  0  0  0  0  0  0
    5.7410    0.5709    0.6995 C   0  0  0  0  0  0  0  0  0  0  0  0
    9.0351   -2.2420    0.0673 C   0  0  0  0  0  0  0  0  0  0  0  0
    9.8494   -2.0433   -1.2614 C   0  0  0  0  0  0  0  0  0  0  0  0
    8.4498   -3.6951    0.0315 C   0  0  0  0  0  0  0  0  0  0  0  0
   10.0573   -2.0923    1.2475 C   0  0  0  0  0  0  0  0  0  0  0  0
    0.6043    1.0245    6.2353 O   0  0  0  0  0  0  0  0  0  0  0  0
    2.3802   -0.6551    7.2072 O   0  0  0  0  0  0  0  0  0  0  0  0
   -0.0354   -6.6948    8.7728 O   0  0  0  0  0  0  0  0  0  0  0  0
   -2.5371   -5.7665    9.4194 N   0  0  0  0  0  0  0  0  0  0  0  0
   -3.7526   -3.9662    7.4692 F   0  0  0  0  0  0  0  0  0  0  0  0
    0.8289   -6.0121    9.7078 C   0  0  0  0  0  0  0  0  0  0  0  0
    1.4550   -7.0589   10.6626 C   0  0  0  0  0  0  0  0  0  0  0  0
    2.3897   -6.4433   11.7376 C   0  0  0  0  0  0  0  0  0  0  0  0
    2.9023   -7.4350   12.5388 F   0  0  0  0  0  0  0  0  0  0  0  0
    1.7074   -5.5647   12.5465 F   0  0  0  0  0  0  0  0  0  0  0  0
    3.4494   -5.7854   11.1582 F   0  0  0  0  0  0  0  0  0  0  0  0
   -2.3272   -3.4236    5.4239 H   0  0  0  0  0  0  0  0  0  0  0  0
    0.9144   -5.8720    6.5342 H   0  0  0  0  0  0  0  0  0  0  0  0
    0.7503   -4.9167    4.2001 H   0  0  0  0  0  0  0  0  0  0  0  0
   -0.4953   -3.7456    3.8371 H   0  0  0  0  0  0  0  0  0  0  0  0
   -0.3742   -1.3514    4.8268 H   0  0  0  0  0  0  0  0  0  0  0  0
   -0.1271   -1.9673    6.4708 H   0  0  0  0  0  0  0  0  0  0  0  0
    1.8624   -3.2549    5.7323 H   0  0  0  0  0  0  0  0  0  0  0  0
    1.3847   -2.0854    2.9359 H   0  0  0  0  0  0  0  0  0  0  0  0
    3.7939   -1.7688    4.8005 H   0  0  0  0  0  0  0  0  0  0  0  0
    1.9352    0.4002    3.6687 H   0  0  0  0  0  0  0  0  0  0  0  0
    3.3110    0.6807    4.7528 H   0  0  0  0  0  0  0  0  0  0  0  0
    3.2842   -3.9516    3.8744 H   0  0  0  0  0  0  0  0  0  0  0  0
    3.4216   -0.6433    2.1072 H   0  0  0  0  0  0  0  0  0  0  0  0
    5.0950    0.5828    3.2939 H   0  0  0  0  0  0  0  0  0  0  0  0
    5.8617   -0.9311    3.7374 H   0  0  0  0  0  0  0  0  0  0  0  0
    7.3028   -1.9941    2.1591 H   0  0  0  0  0  0  0  0  0  0  0  0
    8.0543   -0.1610   -1.5761 H   0  0  0  0  0  0  0  0  0  0  0  0
    6.2610    1.3368   -1.1965 H   0  0  0  0  0  0  0  0  0  0  0  0
    4.9810    1.2388    0.8387 H   0  0  0  0  0  0  0  0  0  0  0  0
   10.6592   -2.7735   -1.3495 H   0  0  0  0  0  0  0  0  0  0  0  0
    9.2032   -2.1654   -2.1345 H   0  0  0  0  0  0  0  0  0  0  0  0
   10.2980   -1.0465   -1.2939 H   0  0  0  0  0  0  0  0  0  0  0  0
    9.2341   -4.4351   -0.1478 H   0  0  0  0  0  0  0  0  0  0  0  0
    7.7094   -3.7863   -0.7684 H   0  0  0  0  0  0  0  0  0  0  0  0
    7.9637   -3.9581    0.9730 H   0  0  0  0  0  0  0  0  0  0  0  0
   10.9204   -2.7495    1.1150 H   0  0  0  0  0  0  0  0  0  0  0  0
    9.6075   -2.3456    2.2088 H   0  0  0  0  0  0  0  0  0  0  0  0
   10.4215   -1.0628    1.3066 H   0  0  0  0  0  0  0  0  0  0  0  0
   -2.0697   -6.4002    9.9911 H   0  0  0  0  0  0  0  0  0  0  0  0
   -3.4009   -5.4183    9.6921 H   0  0  0  0  0  0  0  0  0  0  0  0
    1.6296   -5.4843    9.1766 H   0  0  0  0  0  0  0  0  0  0  0  0
    0.2614   -5.2848   10.3003 H   0  0  0  0  0  0  0  0  0  0  0  0
    0.6452   -7.5986   11.1650 H   0  0  0  0  0  0  0  0  0  0  0  0
    2.0247   -7.7829   10.0697 H   0  0  0  0  0  0  0  0  0  0  0  0
  1  2  2  0  0  0  0
  1 30  1  0  0  0  0
  2  3  1  0  0  0  0
  2 31  1  0  0  0  0
  3  4  2  0  0  0  0
  3 38  1  0  0  0  0
  4  5  1  0  0  0  0
  4  7  1  0  0  0  0
  5  6  2  0  0  0  0
  5 39  1  0  0  0  0
  6  1  1  0  0  0  0
  6 29  1  0  0  0  0
  7 40  1  0  0  0  0
  7 41  1  0  0  0  0
  8  9  1  0  0  0  0
  8 42  1  0  0  0  0
  8 43  1  0  0  0  0
  9 10  1  0  0  0  0
  9  7  1  0  0  0  0
  9 44  1  1  0  0  0
 10 11  1  0  0  0  0
 10 14  1  0  0  0  0
 10 45  1  6  0  0  0
 11 12  1  0  0  0  0
 11 15  1  0  0  0  0
 11 46  1  1  0  0  0
 12 13  1  0  0  0  0
 12 47  1  0  0  0  0
 12 48  1  0  0  0  0
 13  8  1  0  0  0  0
 13 27  2  0  0  0  0
 13 28  2  0  0  0  0
 14 49  1  0  0  0  0
 15 16  1  0  0  0  0
 15 50  1  0  0  0  0
 16 17  1  0  0  0  0
 16 51  1  0  0  0  0
 16 52  1  0  0  0  0
 17 18  2  0  0  0  0
 18 19  1  0  0  0  0
 18 53  1  0  0  0  0
 19 20  2  0  0  0  0
 19 23  1  0  0  0  0
 20 21  1  0  0  0  0
 20 54  1  0  0  0  0
 21 22  2  0  0  0  0
 21 55  1  0  0  0  0
 22 17  1  0  0  0  0
 22 56  1  0  0  0  0
 23 24  1  0  0  0  0
 23 25  1  0  0  0  0
 23 26  1  0  0  0  0
 24 57  1  0  0  0  0
 24 58  1  0  0  0  0
 24 59  1  0  0  0  0
 25 60  1  0  0  0  0
 25 61  1  0  0  0  0
 25 62  1  0  0  0  0
 26 63  1  0  0  0  0
 26 64  1  0  0  0  0
 26 65  1  0  0  0  0
 29 32  1  0  0  0  0
 30 66  1  0  0  0  0
 30 67  1  0  0  0  0
 32 33  1  0  0  0  0
 32 68  1  0  0  0  0
 32 69  1  0  0  0  0
 33 34  1  0  0  0  0
 33 70  1  0  0  0  0
 33 71  1  0  0  0  0
 34 35  1  0  0  0  0
 34 36  1  0  0  0  0
 34 37  1  0  0  0  0
M  END
$$$$
Dataset (61)
 OpenBabel02101614293D

 71 73  0  0  0  0  0  0  0  0999 V2000
   -1.8819   -5.3331    8.1874 C   0  0  0  0  0  0  0  0  0  0  0  0
   -2.5402   -4.4671    7.2345 C   0  0  0  0  0  0  0  0  0  0  0  0
   -1.9175   -4.1032    6.0285 C   0  0  0  0  0  0  0  0  0  0  0  0
   -0.6208   -4.5668    5.7206 C   0  0  0  0  0  0  0  0  0  0  0  0
   -0.0013   -5.4680    6.6120 C   0  0  0  0  0  0  0  0  0  0  0  0
   -0.5957   -5.8167    7.8410 C   0  0  0  0  0  0  0  0  0  0  0  0
    0.1282   -4.0473    4.5376 C   0  0  0  0  0  0  0  0  0  0  0  0
    0.3630   -1.6921    5.5358 C   0  0  0  0  0  0  0  0  0  0  0  0
    1.1355   -2.8991    4.9109 C   0  0  2  0  0  0  0  0  0  0  0  0
    2.0303   -2.4720    3.6854 C   0  0  1  0  0  0  0  0  0  0  0  0
    3.1225   -1.3875    3.9905 C   0  0  2  0  0  0  0  0  0  0  0  0
    2.5190   -0.0418    4.4871 C   0  0  0  0  0  0  0  0  0  0  0  0
    1.4762   -0.3103    5.9594 S   0  0  0  0  0  0  0  0  0  0  0  0
    2.7011   -3.6221    3.1590 O   0  0  0  0  0  0  0  0  0  0  0  0
    3.9467   -1.1599    2.7646 N   0  0  0  0  0  0  0  0  0  0  0  0
    5.2434   -0.4618    2.9565 C   0  0  0  0  0  0  0  0  0  0  0  0
    6.0223   -0.4123    1.6917 C   0  0  0  0  0  0  0  0  0  0  0  0
    7.0973   -1.3015    1.4526 C   0  0  0  0  0  0  0  0  0  0  0  0
    7.8854   -1.2576    0.2678 C   0  0  0  0  0  0  0  0  0  0  0  0
    7.5303   -0.2684   -0.6890 C   0  0  0  0  0  0  0  0  0  0  0  0
    6.4697    0.6282   -0.4701 C   0  0  0  0  0  0  0  0  0  0  0  0
    5.7180    0.5554    0.7122 C   0  0  0  0  0  0  0  0  0  0  0  0
    9.0332   -2.2423    0.0733 C   0  0  0  0  0  0  0  0  0  0  0  0
    9.8421   -2.0423   -1.2575 C   0  0  0  0  0  0  0  0  0  0  0  0
    8.4628   -3.7005    0.0333 C   0  0  0  0  0  0  0  0  0  0  0  0
   10.0733   -2.1048    1.2393 C   0  0  0  0  0  0  0  0  0  0  0  0
    0.6228    1.0081    6.2806 O   0  0  0  0  0  0  0  0  0  0  0  0
    2.3920   -0.6944    7.2185 O   0  0  0  0  0  0  0  0  0  0  0  0
    0.1158   -6.6516    8.6696 O   0  0  0  0  0  0  0  0  0  0  0  0
   -2.3768   -5.7469    9.4316 N   0  0  0  0  0  0  0  0  0  0  0  0
   -3.7260   -3.9980    7.5106 F   0  0  0  0  0  0  0  0  0  0  0  0
    0.9103   -6.0242    9.7151 C   0  0  0  0  0  0  0  0  0  0  0  0
    2.1201   -5.1940    9.1645 C   0  0  0  0  0  0  0  0  0  0  0  0
    2.8562   -5.9130    8.2518 F   0  0  0  0  0  0  0  0  0  0  0  0
    1.6855   -4.0379    8.5599 F   0  0  0  0  0  0  0  0  0  0  0  0
    2.9707   -4.7801   10.1615 F   0  0  0  0  0  0  0  0  0  0  0  0
    1.3217   -7.1705   10.6906 C   0  0  0  0  0  0  0  0  0  0  0  0
    0.2010   -7.8253   11.1469 F   0  0  0  0  0  0  0  0  0  0  0  0
    2.1328   -8.0988   10.0788 F   0  0  0  0  0  0  0  0  0  0  0  0
    1.9694   -6.6936   11.8062 F   0  0  0  0  0  0  0  0  0  0  0  0
   -2.3991   -3.4661    5.3883 H   0  0  0  0  0  0  0  0  0  0  0  0
    0.9201   -5.8459    6.3818 H   0  0  0  0  0  0  0  0  0  0  0  0
    0.6632   -4.8817    4.0770 H   0  0  0  0  0  0  0  0  0  0  0  0
   -0.5683   -3.6778    3.7801 H   0  0  0  0  0  0  0  0  0  0  0  0
   -0.3819   -1.3214    4.8277 H   0  0  0  0  0  0  0  0  0  0  0  0
   -0.1425   -1.9790    6.4593 H   0  0  0  0  0  0  0  0  0  0  0  0
    1.8126   -3.2912    5.6771 H   0  0  0  0  0  0  0  0  0  0  0  0
    1.3800   -2.0979    2.8900 H   0  0  0  0  0  0  0  0  0  0  0  0
    3.7701   -1.7898    4.7774 H   0  0  0  0  0  0  0  0  0  0  0  0
    1.9037    0.4062    3.7035 H   0  0  0  0  0  0  0  0  0  0  0  0
    3.3011    0.6626    4.7705 H   0  0  0  0  0  0  0  0  0  0  0  0
    3.2837   -3.9394    3.8816 H   0  0  0  0  0  0  0  0  0  0  0  0
    3.3837   -0.6142    2.1070 H   0  0  0  0  0  0  0  0  0  0  0  0
    5.0793    0.5626    3.2992 H   0  0  0  0  0  0  0  0  0  0  0  0
    5.8149   -0.9755    3.7337 H   0  0  0  0  0  0  0  0  0  0  0  0
    7.3095   -1.9988    2.1676 H   0  0  0  0  0  0  0  0  0  0  0  0
    8.0345   -0.1759   -1.5713 H   0  0  0  0  0  0  0  0  0  0  0  0
    6.2452    1.3379   -1.1716 H   0  0  0  0  0  0  0  0  0  0  0  0
    4.9550    1.2221    0.8574 H   0  0  0  0  0  0  0  0  0  0  0  0
   10.6546   -2.7695   -1.3422 H   0  0  0  0  0  0  0  0  0  0  0  0
    9.1985   -2.1712   -2.1300 H   0  0  0  0  0  0  0  0  0  0  0  0
   10.2878   -1.0459   -1.2949 H   0  0  0  0  0  0  0  0  0  0  0  0
    9.2579   -4.4287   -0.1429 H   0  0  0  0  0  0  0  0  0  0  0  0
    7.7287   -3.7996   -0.7704 H   0  0  0  0  0  0  0  0  0  0  0  0
    7.9754   -3.9729    0.9706 H   0  0  0  0  0  0  0  0  0  0  0  0
   10.9284   -2.7675    1.0842 H   0  0  0  0  0  0  0  0  0  0  0  0
    9.6411   -2.3632    2.2068 H   0  0  0  0  0  0  0  0  0  0  0  0
   10.4477   -1.0799    1.2985 H   0  0  0  0  0  0  0  0  0  0  0  0
   -1.8585   -6.3515    9.9868 H   0  0  0  0  0  0  0  0  0  0  0  0
   -3.2343   -5.4195    9.7482 H   0  0  0  0  0  0  0  0  0  0  0  0
    0.2816   -5.3395   10.2960 H   0  0  0  0  0  0  0  0  0  0  0  0
  1  2  2  0  0  0  0
  1 30  1  0  0  0  0
  2  3  1  0  0  0  0
  2 31  1  0  0  0  0
  3  4  2  0  0  0  0
  3 41  1  0  0  0  0
  4  5  1  0  0  0  0
  4  7  1  0  0  0  0
  5  6  2  0  0  0  0
  5 42  1  0  0  0  0
  6  1  1  0  0  0  0
  6 29  1  0  0  0  0
  7 43  1  0  0  0  0
  7 44  1  0  0  0  0
  8  9  1  0  0  0  0
  8 45  1  0  0  0  0
  8 46  1  0  0  0  0
  9 10  1  0  0  0  0
  9  7  1  0  0  0  0
  9 47  1  1  0  0  0
 10 11  1  0  0  0  0
 10 14  1  0  0  0  0
 10 48  1  6  0  0  0
 11 12  1  0  0  0  0
 11 15  1  0  0  0  0
 11 49  1  1  0  0  0
 12 13  1  0  0  0  0
 12 50  1  0  0  0  0
 12 51  1  0  0  0  0
 13  8  1  0  0  0  0
 13 27  2  0  0  0  0
 13 28  2  0  0  0  0
 14 52  1  0  0  0  0
 15 16  1  0  0  0  0
 15 53  1  0  0  0  0
 16 17  1  0  0  0  0
 16 54  1  0  0  0  0
 16 55  1  0  0  0  0
 17 18  2  0  0  0  0
 18 19  1  0  0  0  0
 18 56  1  0  0  0  0
 19 20  2  0  0  0  0
 19 23  1  0  0  0  0
 20 21  1  0  0  0  0
 20 57  1  0  0  0  0
 21 22  2  0  0  0  0
 21 58  1  0  0  0  0
 22 17  1  0  0  0  0
 22 59  1  0  0  0  0
 23 24  1  0  0  0  0
 23 25  1  0  0  0  0
 23 26  1  0  0  0  0
 24 60  1  0  0  0  0
 24 61  1  0  0  0  0
 24 62  1  0  0  0  0
 25 63  1  0  0  0  0
 25 64  1  0  0  0  0
 25 65  1  0  0  0  0
 26 66  1  0  0  0  0
 26 67  1  0  0  0  0
 26 68  1  0  0  0  0
 29 32  1  0  0  0  0
 30 69  1  0  0  0  0
 30 70  1  0  0  0  0
 32 33  1  0  0  0  0
 32 37  1  0  0  0  0
 32 71  1  0  0  0  0
 33 34  1  0  0  0  0
 33 35  1  0  0  0  0
 33 36  1  0  0  0  0
 37 38  1  0  0  0  0
 37 39  1  0  0  0  0
 37 40  1  0  0  0  0
M  END
$$$$
Dataset (62)
 OpenBabel02101614293D

 72 74  0  0  0  0  0  0  0  0999 V2000
   -4.4831    0.3136   -0.8391 C   0  0  0  0  0  0  0  0  0  0  0  0
   -5.8899    0.3575   -0.9421 C   0  0  0  0  0  0  0  0  0  0  0  0
   -6.6123    1.4016   -0.3333 C   0  0  0  0  0  0  0  0  0  0  0  0
   -5.9503    2.4112    0.4052 C   0  0  0  0  0  0  0  0  0  0  0  0
   -4.5388    2.3781    0.4726 C   0  0  0  0  0  0  0  0  0  0  0  0
   -3.8068    1.3312   -0.1275 C   0  0  0  0  0  0  0  0  0  0  0  0
   -6.7279    3.4493    1.1496 C   0  0  0  0  0  0  0  0  0  0  0  0
   -7.7088    1.7471    2.7871 C   0  0  0  0  0  0  0  0  0  0  0  0
   -6.9421    3.1013    2.6653 C   0  0  2  0  0  0  0  0  0  0  0  0
   -7.6638    4.2625    3.4527 C   0  0  1  0  0  0  0  0  0  0  0  0
   -7.7767    4.0241    5.0034 C   0  0  2  0  0  0  0  0  0  0  0  0
   -8.6507    2.7854    5.3551 C   0  0  0  0  0  0  0  0  0  0  0  0
   -7.9944    1.2968    4.5299 S   0  0  0  0  0  0  0  0  0  0  0  0
   -6.8738    5.4824    3.2743 O   0  0  0  0  0  0  0  0  0  0  0  0
   -8.3348    5.2477    5.6548 N   0  0  0  0  0  0  0  0  0  0  0  0
   -8.2241    5.3309    7.1349 C   0  0  0  0  0  0  0  0  0  0  0  0
   -8.7429    6.6315    7.6307 C   0  0  0  0  0  0  0  0  0  0  0  0
   -7.8612    7.6914    7.9423 C   0  0  0  0  0  0  0  0  0  0  0  0
   -8.3056    8.9366    8.4683 C   0  0  0  0  0  0  0  0  0  0  0  0
   -9.7079    9.0782    8.6523 C   0  0  0  0  0  0  0  0  0  0  0  0
  -10.6063    8.0486    8.3288 C   0  0  0  0  0  0  0  0  0  0  0  0
  -10.1270    6.8314    7.8212 C   0  0  0  0  0  0  0  0  0  0  0  0
   -7.2973   10.0299    8.7994 C   0  0  0  0  0  0  0  0  0  0  0  0
   -6.2726    9.4820    9.8544 C   0  0  0  0  0  0  0  0  0  0  0  0
   -6.5556   10.4562    7.4846 C   0  0  0  0  0  0  0  0  0  0  0  0
   -7.9336   11.3288    9.4121 C   0  0  0  0  0  0  0  0  0  0  0  0
   -9.0502    0.0944    4.6174 O   0  0  0  0  0  0  0  0  0  0  0  0
   -6.6018    0.8674    5.1987 O   0  0  0  0  0  0  0  0  0  0  0  0
   -2.4408    1.3246   -0.0124 O   0  0  0  0  0  0  0  0  0  0  0  0
   -3.7912   -0.6970   -1.4108 N   0  0  0  0  0  0  0  0  0  0  0  0
   -6.5471   -0.5721   -1.5833 F   0  0  0  0  0  0  0  0  0  0  0  0
   -1.9681    0.6599    1.1788 C   0  0  0  0  0  0  0  0  0  0  0  0
   -0.4261    0.6838    1.2071 C   0  0  0  0  0  0  0  0  0  0  0  0
    0.0817    0.0024    0.0436 O   0  0  0  0  0  0  0  0  0  0  0  0
    1.5163   -0.0233   -0.0301 C   0  0  0  0  0  0  0  0  0  0  0  0
   -7.6341    1.4123   -0.4081 H   0  0  0  0  0  0  0  0  0  0  0  0
   -4.0333    3.1130    0.9766 H   0  0  0  0  0  0  0  0  0  0  0  0
   -7.7062    3.5928    0.6813 H   0  0  0  0  0  0  0  0  0  0  0  0
   -6.2026    4.4026    1.0534 H   0  0  0  0  0  0  0  0  0  0  0  0
   -8.6766    1.8111    2.2832 H   0  0  0  0  0  0  0  0  0  0  0  0
   -7.1378    0.9298    2.3434 H   0  0  0  0  0  0  0  0  0  0  0  0
   -5.9521    2.9659    3.1131 H   0  0  0  0  0  0  0  0  0  0  0  0
   -8.7139    4.3248    3.0542 H   0  0  0  0  0  0  0  0  0  0  0  0
   -6.7638    3.8615    5.3893 H   0  0  0  0  0  0  0  0  0  0  0  0
   -9.6815    2.9535    5.0341 H   0  0  0  0  0  0  0  0  0  0  0  0
   -8.6463    2.5830    6.4251 H   0  0  0  0  0  0  0  0  0  0  0  0
   -5.9889    5.2794    3.6435 H   0  0  0  0  0  0  0  0  0  0  0  0
   -9.3264    5.3062    5.4106 H   0  0  0  0  0  0  0  0  0  0  0  0
   -8.7889    4.5312    7.6177 H   0  0  0  0  0  0  0  0  0  0  0  0
   -7.1784    5.2057    7.4270 H   0  0  0  0  0  0  0  0  0  0  0  0
   -6.8643    7.5428    7.7784 H   0  0  0  0  0  0  0  0  0  0  0  0
  -10.1132    9.9364    9.0219 H   0  0  0  0  0  0  0  0  0  0  0  0
  -11.6114    8.1874    8.4651 H   0  0  0  0  0  0  0  0  0  0  0  0
  -10.7943    6.0886    7.5983 H   0  0  0  0  0  0  0  0  0  0  0  0
   -5.5589   10.2491   10.1619 H   0  0  0  0  0  0  0  0  0  0  0  0
   -5.6921    8.6484    9.4572 H   0  0  0  0  0  0  0  0  0  0  0  0
   -6.7966    9.1287   10.7466 H   0  0  0  0  0  0  0  0  0  0  0  0
   -5.8504   11.2705    7.6646 H   0  0  0  0  0  0  0  0  0  0  0  0
   -7.2740   10.7923    6.7323 H   0  0  0  0  0  0  0  0  0  0  0  0
   -5.9883    9.6281    7.0580 H   0  0  0  0  0  0  0  0  0  0  0  0
   -7.1735   12.0809    9.6365 H   0  0  0  0  0  0  0  0  0  0  0  0
   -8.6453   11.7806    8.7176 H   0  0  0  0  0  0  0  0  0  0  0  0
   -8.4579   11.1017   10.3431 H   0  0  0  0  0  0  0  0  0  0  0  0
   -4.2643   -1.4130   -1.8644 H   0  0  0  0  0  0  0  0  0  0  0  0
   -2.8213   -0.7133   -1.3696 H   0  0  0  0  0  0  0  0  0  0  0  0
   -2.3428    1.1630    2.0758 H   0  0  0  0  0  0  0  0  0  0  0  0
   -2.3027   -0.3818    1.1996 H   0  0  0  0  0  0  0  0  0  0  0  0
   -0.0892    1.7253    1.2217 H   0  0  0  0  0  0  0  0  0  0  0  0
   -0.0795    0.1884    2.1205 H   0  0  0  0  0  0  0  0  0  0  0  0
    1.9264    0.9882   -0.0738 H   0  0  0  0  0  0  0  0  0  0  0  0
    1.8024   -0.5483   -0.9406 H   0  0  0  0  0  0  0  0  0  0  0  0
    1.9438   -0.5555    0.8225 H   0  0  0  0  0  0  0  0  0  0  0  0
  1  2  2  0  0  0  0
  1 30  1  0  0  0  0
  2  3  1  0  0  0  0
  2 31  1  0  0  0  0
  3  4  2  0  0  0  0
  3 36  1  0  0  0  0
  4  5  1  0  0  0  0
  4  7  1  0  0  0  0
  5  6  2  0  0  0  0
  5 37  1  0  0  0  0
  6  1  1  0  0  0  0
  6 29  1  0  0  0  0
  7 38  1  0  0  0  0
  7 39  1  0  0  0  0
  8  9  1  0  0  0  0
  8 40  1  0  0  0  0
  8 41  1  0  0  0  0
  9 10  1  0  0  0  0
  9  7  1  0  0  0  0
  9 42  1  1  0  0  0
 10 11  1  0  0  0  0
 10 14  1  0  0  0  0
 10 43  1  6  0  0  0
 11 12  1  0  0  0  0
 11 15  1  0  0  0  0
 11 44  1  1  0  0  0
 12 13  1  0  0  0  0
 12 45  1  0  0  0  0
 12 46  1  0  0  0  0
 13  8  1  0  0  0  0
 13 27  2  0  0  0  0
 13 28  2  0  0  0  0
 14 47  1  0  0  0  0
 15 16  1  0  0  0  0
 15 48  1  0  0  0  0
 16 17  1  0  0  0  0
 16 49  1  0  0  0  0
 16 50  1  0  0  0  0
 17 18  2  0  0  0  0
 18 19  1  0  0  0  0
 18 51  1  0  0  0  0
 19 20  2  0  0  0  0
 19 23  1  0  0  0  0
 20 21  1  0  0  0  0
 20 52  1  0  0  0  0
 21 22  2  0  0  0  0
 21 53  1  0  0  0  0
 22 17  1  0  0  0  0
 22 54  1  0  0  0  0
 23 24  1  0  0  0  0
 23 25  1  0  0  0  0
 23 26  1  0  0  0  0
 24 55  1  0  0  0  0
 24 56  1  0  0  0  0
 24 57  1  0  0  0  0
 25 58  1  0  0  0  0
 25 59  1  0  0  0  0
 25 60  1  0  0  0  0
 26 61  1  0  0  0  0
 26 62  1  0  0  0  0
 26 63  1  0  0  0  0
 29 32  1  0  0  0  0
 30 64  1  0  0  0  0
 30 65  1  0  0  0  0
 32 33  1  0  0  0  0
 32 66  1  0  0  0  0
 32 67  1  0  0  0  0
 33 34  1  0  0  0  0
 33 68  1  0  0  0  0
 33 69  1  0  0  0  0
 34 35  1  0  0  0  0
 35 70  1  0  0  0  0
 35 71  1  0  0  0  0
 35 72  1  0  0  0  0
M  END
$$$$
Dataset (63)
 OpenBabel02101614293D

 71 73  0  0  0  0  0  0  0  0999 V2000
   -3.9260   -3.8591    5.6789 C   0  0  0  0  0  0  0  0  0  0  0  0
   -3.5146   -3.2864    6.9385 C   0  0  0  0  0  0  0  0  0  0  0  0
   -2.9404   -2.0055    7.0058 C   0  0  0  0  0  0  0  0  0  0  0  0
   -2.7334   -1.2473    5.8338 C   0  0  0  0  0  0  0  0  0  0  0  0
   -3.1853   -1.7744    4.6073 C   0  0  0  0  0  0  0  0  0  0  0  0
   -3.7493   -3.0644    4.5192 C   0  0  0  0  0  0  0  0  0  0  0  0
   -1.9842    0.0466    5.8693 C   0  0  0  0  0  0  0  0  0  0  0  0
    0.2329   -1.0951    6.4558 C   0  0  0  0  0  0  0  0  0  0  0  0
   -0.4725   -0.1126    5.4664 C   0  0  2  0  0  0  0  0  0  0  0  0
    0.2734    1.2743    5.3724 C   0  0  1  0  0  0  0  0  0  0  0  0
    1.7647    1.2116    4.8852 C   0  0  2  0  0  0  0  0  0  0  0  0
    2.6682    0.3814    5.8402 C   0  0  0  0  0  0  0  0  0  0  0  0
    2.0006   -1.3008    6.0648 S   0  0  0  0  0  0  0  0  0  0  0  0
   -0.4362    2.1392    4.4827 O   0  0  0  0  0  0  0  0  0  0  0  0
    2.3002    2.5996    4.7428 N   0  0  0  0  0  0  0  0  0  0  0  0
    3.5502    2.7625    3.9539 C   0  0  0  0  0  0  0  0  0  0  0  0
    3.9029    4.1992    3.7886 C   0  0  0  0  0  0  0  0  0  0  0  0
    3.6220    4.8923    2.5863 C   0  0  0  0  0  0  0  0  0  0  0  0
    3.9779    6.2548    2.3777 C   0  0  0  0  0  0  0  0  0  0  0  0
    4.6295    6.9121    3.4551 C   0  0  0  0  0  0  0  0  0  0  0  0
    4.9124    6.2449    4.6597 C   0  0  0  0  0  0  0  0  0  0  0  0
    4.5521    4.8998    4.8274 C   0  0  0  0  0  0  0  0  0  0  0  0
    3.6598    6.9361    1.0541 C   0  0  0  0  0  0  0  0  0  0  0  0
    4.1603    8.4220    0.9474 C   0  0  0  0  0  0  0  0  0  0  0  0
    2.1065    6.9684    0.8583 C   0  0  0  0  0  0  0  0  0  0  0  0
    4.3378    6.1566   -0.1264 C   0  0  0  0  0  0  0  0  0  0  0  0
    2.7484   -2.0475    7.2708 O   0  0  0  0  0  0  0  0  0  0  0  0
    2.1620   -2.1379    4.7075 O   0  0  0  0  0  0  0  0  0  0  0  0
   -4.1207   -3.5128    3.2754 O   0  0  0  0  0  0  0  0  0  0  0  0
   -4.4813   -5.1294    5.4735 N   0  0  0  0  0  0  0  0  0  0  0  0
   -3.6605   -3.9809    8.0316 F   0  0  0  0  0  0  0  0  0  0  0  0
   -3.1167   -4.2811    2.5674 C   0  0  0  0  0  0  0  0  0  0  0  0
   -1.8814   -3.4352    2.1506 C   0  0  0  0  0  0  0  0  0  0  0  0
   -3.8178   -4.8758    1.3233 C   0  0  0  0  0  0  0  0  0  0  0  0
   -2.6418   -1.6375    7.9136 H   0  0  0  0  0  0  0  0  0  0  0  0
   -3.0780   -1.2202    3.7539 H   0  0  0  0  0  0  0  0  0  0  0  0
   -2.4847    0.7502    5.1965 H   0  0  0  0  0  0  0  0  0  0  0  0
   -2.0449    0.4831    6.8719 H   0  0  0  0  0  0  0  0  0  0  0  0
    0.1467   -0.7218    7.4788 H   0  0  0  0  0  0  0  0  0  0  0  0
   -0.2040   -2.0933    6.4096 H   0  0  0  0  0  0  0  0  0  0  0  0
   -0.4402   -0.5640    4.4692 H   0  0  0  0  0  0  0  0  0  0  0  0
    0.2481    1.7523    6.3551 H   0  0  0  0  0  0  0  0  0  0  0  0
    1.7705    0.7348    3.8987 H   0  0  0  0  0  0  0  0  0  0  0  0
    2.7204    0.8626    6.8176 H   0  0  0  0  0  0  0  0  0  0  0  0
    3.6762    0.2798    5.4400 H   0  0  0  0  0  0  0  0  0  0  0  0
   -0.4065    1.6921    3.6110 H   0  0  0  0  0  0  0  0  0  0  0  0
    2.4717    2.9675    5.6810 H   0  0  0  0  0  0  0  0  0  0  0  0
    4.3823    2.2575    4.4490 H   0  0  0  0  0  0  0  0  0  0  0  0
    3.4213    2.2893    2.9767 H   0  0  0  0  0  0  0  0  0  0  0  0
    3.1476    4.3797    1.8407 H   0  0  0  0  0  0  0  0  0  0  0  0
    4.9174    7.8890    3.3904 H   0  0  0  0  0  0  0  0  0  0  0  0
    5.3919    6.7384    5.4165 H   0  0  0  0  0  0  0  0  0  0  0  0
    4.7801    4.4305    5.7075 H   0  0  0  0  0  0  0  0  0  0  0  0
    3.9072    8.8587   -0.0222 H   0  0  0  0  0  0  0  0  0  0  0  0
    3.6985    9.0471    1.7154 H   0  0  0  0  0  0  0  0  0  0  0  0
    5.2463    8.4775    1.0579 H   0  0  0  0  0  0  0  0  0  0  0  0
    1.8412    7.4891   -0.0640 H   0  0  0  0  0  0  0  0  0  0  0  0
    1.6299    7.4898    1.6919 H   0  0  0  0  0  0  0  0  0  0  0  0
    1.6801    5.9649    0.8012 H   0  0  0  0  0  0  0  0  0  0  0  0
    4.1649    6.6619   -1.0794 H   0  0  0  0  0  0  0  0  0  0  0  0
    3.9492    5.1415   -0.2274 H   0  0  0  0  0  0  0  0  0  0  0  0
    5.4173    6.0901    0.0293 H   0  0  0  0  0  0  0  0  0  0  0  0
   -4.7481   -5.4107    4.5861 H   0  0  0  0  0  0  0  0  0  0  0  0
   -4.5897   -5.7398    6.2205 H   0  0  0  0  0  0  0  0  0  0  0  0
   -2.7717   -5.1249    3.1771 H   0  0  0  0  0  0  0  0  0  0  0  0
   -2.1981   -2.5277    1.6298 H   0  0  0  0  0  0  0  0  0  0  0  0
   -1.2248   -4.0107    1.4970 H   0  0  0  0  0  0  0  0  0  0  0  0
   -1.3010   -3.1528    3.0301 H   0  0  0  0  0  0  0  0  0  0  0  0
   -4.1972   -4.0816    0.6764 H   0  0  0  0  0  0  0  0  0  0  0  0
   -4.6567   -5.5049    1.6283 H   0  0  0  0  0  0  0  0  0  0  0  0
   -3.1190   -5.4917    0.7556 H   0  0  0  0  0  0  0  0  0  0  0  0
  1  2  2  0  0  0  0
  1 30  1  0  0  0  0
  2  3  1  0  0  0  0
  2 31  1  0  0  0  0
  3  4  2  0  0  0  0
  3 35  1  0  0  0  0
  4  5  1  0  0  0  0
  4  7  1  0  0  0  0
  5  6  2  0  0  0  0
  5 36  1  0  0  0  0
  6  1  1  0  0  0  0
  6 29  1  0  0  0  0
  7 37  1  0  0  0  0
  7 38  1  0  0  0  0
  8  9  1  0  0  0  0
  8 39  1  0  0  0  0
  8 40  1  0  0  0  0
  9 10  1  0  0  0  0
  9  7  1  0  0  0  0
  9 41  1  6  0  0  0
 10 11  1  0  0  0  0
 10 14  1  0  0  0  0
 10 42  1  1  0  0  0
 11 12  1  0  0  0  0
 11 15  1  0  0  0  0
 11 43  1  6  0  0  0
 12 13  1  0  0  0  0
 12 44  1  0  0  0  0
 12 45  1  0  0  0  0
 13  8  1  0  0  0  0
 13 27  2  0  0  0  0
 13 28  2  0  0  0  0
 14 46  1  0  0  0  0
 15 16  1  0  0  0  0
 15 47  1  0  0  0  0
 16 17  1  0  0  0  0
 16 48  1  0  0  0  0
 16 49  1  0  0  0  0
 17 18  2  0  0  0  0
 18 19  1  0  0  0  0
 18 50  1  0  0  0  0
 19 20  2  0  0  0  0
 19 23  1  0  0  0  0
 20 21  1  0  0  0  0
 20 51  1  0  0  0  0
 21 22  2  0  0  0  0
 21 52  1  0  0  0  0
 22 17  1  0  0  0  0
 22 53  1  0  0  0  0
 23 24  1  0  0  0  0
 23 25  1  0  0  0  0
 23 26  1  0  0  0  0
 24 54  1  0  0  0  0
 24 55  1  0  0  0  0
 24 56  1  0  0  0  0
 25 57  1  0  0  0  0
 25 58  1  0  0  0  0
 25 59  1  0  0  0  0
 26 60  1  0  0  0  0
 26 61  1  0  0  0  0
 26 62  1  0  0  0  0
 29 32  1  0  0  0  0
 30 63  1  0  0  0  0
 30 64  1  0  0  0  0
 32 33  1  0  0  0  0
 32 34  1  0  0  0  0
 32 65  1  0  0  0  0
 33 66  1  0  0  0  0
 33 67  1  0  0  0  0
 33 68  1  0  0  0  0
 34 69  1  0  0  0  0
 34 70  1  0  0  0  0
 34 71  1  0  0  0  0
M  END
$$$$
Dataset (64)
 OpenBabel02101614293D

 71 73  0  0  0  0  0  0  0  0999 V2000
   -2.0841   -5.3755    8.1487 C   0  0  0  0  0  0  0  0  0  0  0  0
   -2.6604   -4.5258    7.1341 C   0  0  0  0  0  0  0  0  0  0  0  0
   -1.9224   -4.1307    6.0060 C   0  0  0  0  0  0  0  0  0  0  0  0
   -0.5837   -4.5486    5.8371 C   0  0  0  0  0  0  0  0  0  0  0  0
   -0.0147   -5.3891    6.8202 C   0  0  0  0  0  0  0  0  0  0  0  0
   -0.7423   -5.7902    7.9620 C   0  0  0  0  0  0  0  0  0  0  0  0
    0.2217   -4.0839    4.6652 C   0  0  0  0  0  0  0  0  0  0  0  0
    0.3772   -1.6898    5.5595 C   0  0  0  0  0  0  0  0  0  0  0  0
    1.1922   -2.8918    4.9856 C   0  0  2  0  0  0  0  0  0  0  0  0
    2.0590   -2.4645    3.7367 C   0  0  1  0  0  0  0  0  0  0  0  0
    3.1458   -1.3627    4.0098 C   0  0  2  0  0  0  0  0  0  0  0  0
    2.5221   -0.0217    4.4913 C   0  0  0  0  0  0  0  0  0  0  0  0
    1.4661   -0.2816    5.9575 S   0  0  0  0  0  0  0  0  0  0  0  0
    2.7242   -3.6071    3.1932 O   0  0  0  0  0  0  0  0  0  0  0  0
    3.9648   -1.1340    2.7761 N   0  0  0  0  0  0  0  0  0  0  0  0
    5.2682   -0.4375    2.9516 C   0  0  0  0  0  0  0  0  0  0  0  0
    6.0458   -0.3963    1.6819 C   0  0  0  0  0  0  0  0  0  0  0  0
    7.1144   -1.2927    1.4435 C   0  0  0  0  0  0  0  0  0  0  0  0
    7.9002   -1.2600    0.2549 C   0  0  0  0  0  0  0  0  0  0  0  0
    7.5497   -0.2770   -0.7095 C   0  0  0  0  0  0  0  0  0  0  0  0
    6.4928    0.6218   -0.4949 C   0  0  0  0  0  0  0  0  0  0  0  0
    5.7468    0.5660    0.6932 C   0  0  0  0  0  0  0  0  0  0  0  0
    9.0444   -2.2445    0.0618 C   0  0  0  0  0  0  0  0  0  0  0  0
    9.8565   -2.0471   -1.2688 C   0  0  0  0  0  0  0  0  0  0  0  0
    8.4629   -3.6971    0.0247 C   0  0  0  0  0  0  0  0  0  0  0  0
   10.0760   -2.1006    1.2335 C   0  0  0  0  0  0  0  0  0  0  0  0
    0.5925    1.0270    6.2622 O   0  0  0  0  0  0  0  0  0  0  0  0
    2.3791   -0.6456    7.2246 O   0  0  0  0  0  0  0  0  0  0  0  0
   -0.1457   -6.6142    8.8860 O   0  0  0  0  0  0  0  0  0  0  0  0
   -2.7200   -5.8353    9.3125 N   0  0  0  0  0  0  0  0  0  0  0  0
   -3.8910   -4.1180    7.2735 F   0  0  0  0  0  0  0  0  0  0  0  0
    0.8260   -6.0005    9.7699 C   0  0  1  0  0  0  0  0  0  0  0  0
    0.1935   -4.9328   10.7081 C   0  0  0  0  0  0  0  0  0  0  0  0
    1.4860   -7.1560   10.5730 C   0  0  0  0  0  0  0  0  0  0  0  0
    2.0963   -8.0398    9.7152 F   0  0  0  0  0  0  0  0  0  0  0  0
    0.5564   -7.8537   11.3092 F   0  0  0  0  0  0  0  0  0  0  0  0
    2.4542   -6.6911   11.4309 F   0  0  0  0  0  0  0  0  0  0  0  0
   -2.3611   -3.5164    5.3142 H   0  0  0  0  0  0  0  0  0  0  0  0
    0.9477   -5.7146    6.7084 H   0  0  0  0  0  0  0  0  0  0  0  0
    0.7948   -4.9346    4.2845 H   0  0  0  0  0  0  0  0  0  0  0  0
   -0.4509   -3.7805    3.8567 H   0  0  0  0  0  0  0  0  0  0  0  0
   -0.3674   -1.3590    4.8304 H   0  0  0  0  0  0  0  0  0  0  0  0
   -0.1360   -1.9563    6.4853 H   0  0  0  0  0  0  0  0  0  0  0  0
    1.8824   -3.2325    5.7653 H   0  0  0  0  0  0  0  0  0  0  0  0
    1.3879   -2.0999    2.9547 H   0  0  0  0  0  0  0  0  0  0  0  0
    3.8053   -1.7430    4.7978 H   0  0  0  0  0  0  0  0  0  0  0  0
    1.9096    0.4083    3.6971 H   0  0  0  0  0  0  0  0  0  0  0  0
    3.2981    0.6927    4.7658 H   0  0  0  0  0  0  0  0  0  0  0  0
    3.3229   -3.9199    3.9028 H   0  0  0  0  0  0  0  0  0  0  0  0
    3.3999   -0.5819    2.1254 H   0  0  0  0  0  0  0  0  0  0  0  0
    5.1077    0.5878    3.2923 H   0  0  0  0  0  0  0  0  0  0  0  0
    5.8431   -0.9487    3.7284 H   0  0  0  0  0  0  0  0  0  0  0  0
    7.3251   -1.9857    2.1646 H   0  0  0  0  0  0  0  0  0  0  0  0
    8.0556   -0.1925   -1.5922 H   0  0  0  0  0  0  0  0  0  0  0  0
    6.2684    1.3248   -1.2027 H   0  0  0  0  0  0  0  0  0  0  0  0
[truncated: 70,331 more chars]
